# Supplementary material for: Integrative analysis of competitive endogenous RNA network reveals the regulatory role of non-coding RNAs in high-glucose-induced human retinal endothelial cells
Source: PeerJ. 2020 Jun 29;8:e9452. doi: 10.7717/peerj.9452 (PMC7331629; doi:10.7717/peerj.9452)
Supplement: Supplemental Information 2 [file peerj-08-9452-s002.xls]

## Sheet: DE lncRNAs
ID	logFC	AveExpr	t	P.Value	adj.P.Val	B
uc003xve.3	3.20581	8.42615	15.4854	1.14566e-05	0.022238	3.80834
TCONS_00016459	-3.29455	10.5159	-14.1878	1.81658e-05	0.022238	3.48306
ENST00000565968	2.8894	6.03779	14.0328	1.92452e-05	0.022238	3.44077
ENST00000522897	2.77102	9.05381	13.578	2.288e-05	0.022238	3.31202
uc003vqq.3	2.94104	7.6274	13.4478	2.4066e-05	0.022238	3.27384
ENST00000444038	-2.83586	8.06011	-13.2879	2.56233e-05	0.022238	3.22612
TCONS_00007282	-2.65565	6.42824	-13.1158	2.74354e-05	0.022238	3.17367
ENST00000507948	-2.77994	6.37817	-13.1016	2.75913e-05	0.022238	3.1693
ENST00000420168	2.91009	8.91794	12.9292	2.9572e-05	0.022238	3.11558
TCONS_00019478	-2.99392	5.72456	-12.5545	3.44882e-05	0.022238	2.99476
uc.431+	2.70665	5.98263	12.1469	4.09729e-05	0.022238	2.85674
ENST00000443776	-2.50615	9.34513	-12.1319	4.1237e-05	0.022238	2.85154
ENST00000454439	2.43212	8.54206	11.6191	5.16364e-05	0.022238	2.66712
NR_027084	-2.91668	11.6116	-11.5678	5.28382e-05	0.022238	2.648
ENST00000552768	-2.52422	10.5958	-11.5548	5.315e-05	0.022238	2.6431
TCONS_00004039	2.46766	5.36104	11.1057	6.5293e-05	0.022238	2.46989
NR_046600	-3.08579	7.40093	-11.0455	6.71589e-05	0.022238	2.44588
TCONS_00001564	-2.22088	5.28053	-10.9989	6.86461e-05	0.022238	2.42718
ENST00000517998	2.24964	10.3693	10.974	6.94578e-05	0.022238	2.41712
ENST00000513704	2.20443	10.4938	10.9459	7.03852e-05	0.022238	2.40576
ENST00000554458	2.21246	8.84219	10.9331	7.0812e-05	0.022238	2.40058
ENST00000582893	2.36116	5.2204	10.9176	7.13362e-05	0.022238	2.39425
ENST00000446962	-2.22506	6.42252	-10.8828	7.25237e-05	0.022238	2.38007
uc010nxf.2	2.18277	6.36817	10.8303	7.43628e-05	0.022238	2.35852
uc003uyq.3	-3.00221	11.5583	-10.8259	7.45184e-05	0.022238	2.35671
ENST00000433499	2.18808	7.68648	10.8217	7.46671e-05	0.022238	2.355
ENST00000532358	-2.22079	5.57302	-10.5451	8.53623e-05	0.022238	2.23885
NR_037867	2.1669	7.59106	10.4587	8.9065e-05	0.022238	2.20171
uc010fib.1	2.10685	5.61255	10.4298	9.03458e-05	0.022238	2.18918
ENST00000436570	-2.60696	11.336	-10.4251	9.05536e-05	0.022238	2.18717
ENST00000430181	2.73621	6.28086	10.3857	9.23397e-05	0.022238	2.17
ENST00000413669	2.08487	8.89969	10.2965	9.65412e-05	0.022238	2.13079
uc002mbg.1	2.11249	8.27793	10.2384	9.93946e-05	0.022238	2.10504
ENST00000455074	2.1607	7.88667	10.1852	0.000102102	0.022238	2.08122
ENST00000527440	-2.52958	5.46311	-10.165	0.000103151	0.022238	2.07214
ENST00000529696	2.31954	8.72899	10.0978	0.00010673	0.022238	2.04181
ENST00000559214	-2.07425	6.20602	-10.0782	0.000107801	0.022238	2.03291
ENST00000565238	2.03499	5.42285	10.0622	0.000108685	0.022238	2.02562
ENST00000435042	2.14337	6.74163	10.0403	0.000109912	0.022238	2.0156
NR_033972	2.03886	6.08021	10.0305	0.000110466	0.022238	2.01111
ENST00000561669	2.17886	7.56436	9.99762	0.000112347	0.022238	1.99601
uc003mwn.1	2.25854	6.89759	9.9801	0.000113364	0.022238	1.98794
ENST00000419863	2.14248	8.86331	9.95063	0.0001151	0.022238	1.97433
ENST00000565893	2.424	7.19587	9.94834	0.000115236	0.022238	1.97326
ENST00000446249	-2.31178	11.0998	-9.92285	0.000116765	0.022238	1.96144
ENST00000448433	-2.1996	9.30078	-9.87237	0.000119865	0.022238	1.93789
TCONS_00027703	-1.97673	7.77512	-9.86247	0.000120483	0.022238	1.93326
ENST00000431459	2.6397	5.85976	9.83233	0.000122391	0.022238	1.9191
ENST00000356047	2.01188	6.5985	9.78773	0.000125281	0.022238	1.89805
ENST00000560376	-2.09834	8.39195	-9.77863	0.00012588	0.022238	1.89374
ENST00000560242	-2.00406	7.75867	-9.77323	0.000126237	0.022238	1.89118
ENST00000433869	-2.6713	5.31387	-9.68334	0.000132363	0.022238	1.84828
ENST00000559298	1.97644	7.96914	9.67885	0.000132678	0.022238	1.84612
chr1:47977525-47990050-	1.93425	8.42526	9.66976	0.000133318	0.022238	1.84175
ENST00000496067	-2.5197	6.74107	-9.65523	0.00013435	0.022238	1.83475
ENST00000433317	-1.94333	6.13737	-9.63588	0.000135738	0.022238	1.82541
ENST00000517908	1.99651	8.41577	9.63443	0.000135843	0.022238	1.82471
ENST00000564165	1.92541	6.96249	9.63031	0.000136141	0.022238	1.82272
ENST00000579467	2.01699	8.08586	9.61048	0.000137586	0.022238	1.81311
TCONS_00027491	-2.27501	8.99235	-9.58739	0.000139291	0.022238	1.80189
ENST00000535745	2.18982	6.05581	9.56939	0.000140638	0.022238	1.79312
AK123125	-1.92447	6.38568	-9.56493	0.000140975	0.022238	1.79095
ENST00000552675	1.96904	10.8198	9.55297	0.00014188	0.022238	1.78511
ENST00000441146	1.92206	5.58627	9.535	0.000143254	0.022238	1.77631
ENST00000562284	2.03276	7.97279	9.51225	0.000145016	0.022238	1.76515
ENST00000422980	2.0541	6.85326	9.50256	0.000145774	0.022238	1.76038
chr13:57331500-57346525+	1.93238	6.66773	9.48543	0.000147127	0.022238	1.75193
ENST00000439450	-1.92116	7.0868	-9.47014	0.000148345	0.022238	1.74438
uc003jdh.3	-1.93792	5.55899	-9.44565	0.000150323	0.022238	1.73225
ENST00000583117	2.34315	7.66315	9.4233	0.000152155	0.022238	1.72114
ENST00000562945	1.91324	7.96094	9.41716	0.000152663	0.022238	1.71809
ENST00000534388	1.92731	6.30603	9.41632	0.000152733	0.022238	1.71767
ENST00000450264	-1.9229	5.49111	-9.37888	0.000155874	0.022238	1.69897
BG925420	1.89115	6.65173	9.37463	0.000156236	0.022238	1.69684
NR_038838	-2.01504	7.78598	-9.37014	0.000156619	0.022238	1.69459
ENST00000571884	-2.38473	10.8475	-9.36101	0.000157401	0.022238	1.69001
HMlincRNA133-	1.96089	7.06517	9.34185	0.000159057	0.022238	1.68038
ENST00000443103	-1.91284	5.86883	-9.33653	0.000159521	0.022238	1.6777
ENST00000556653	2.11103	8.67911	9.32994	0.000160097	0.022238	1.67438
TCONS_00027288	2.05538	7.99672	9.29712	0.000163004	0.022238	1.65779
ENST00000427278	1.87437	7.56008	9.28179	0.000164383	0.022238	1.65002
ENST00000556850	2.20146	8.23431	9.27115	0.000165349	0.022238	1.64462
NR_046428	-1.92273	5.77452	-9.26651	0.000165771	0.022238	1.64226
ENST00000415141	1.91013	5.89283	9.25739	0.000166607	0.022238	1.63761
ENST00000482142	1.85146	10.9627	9.22981	0.000169163	0.022238	1.62354
TCONS_00024495	1.8956	7.86934	9.21012	0.000171015	0.022238	1.61347
ENST00000412497	1.84267	8.26618	9.19342	0.000172606	0.022238	1.60489
TCONS_00003694	2.71218	5.94472	9.19139	0.000172801	0.022238	1.60385
ENST00000389600	1.90664	9.03494	9.17365	0.000174511	0.022238	1.59472
TCONS_00013804	2.29218	5.576	9.17184	0.000174686	0.022238	1.59379
ENST00000454503	-2.00004	6.25113	-9.15603	0.00017623	0.022238	1.58563
TCONS_00023311	-2.03055	7.47285	-9.1547	0.00017636	0.022238	1.58495
ENST00000433684	1.88828	5.9175	9.14663	0.000177155	0.022238	1.58077
ENST00000432431	-2.13255	8.05628	-9.13615	0.000178194	0.022238	1.57535
ENST00000576302	1.8578	6.43505	9.11919	0.000179888	0.022238	1.56656
ENST00000453549	-2.00378	5.96372	-9.11719	0.000180089	0.022238	1.56552
TCONS_00019636	1.84008	8.10837	9.11658	0.000180151	0.022238	1.5652
TCONS_00026273	-1.83565	8.17626	-9.11076	0.000180739	0.022238	1.56217
ENST00000575924	2.18361	9.12626	9.10197	0.00018163	0.022238	1.5576
ENST00000420130	-1.97264	5.80612	-9.09775	0.000182059	0.022238	1.55541
ENST00000427071	-1.91225	8.00803	-9.07209	0.000184697	0.022238	1.54202
ENST00000445039	1.93037	6.87339	9.05425	0.000186558	0.022238	1.53269
TCONS_00016774	1.98025	7.58544	9.0146	0.000190773	0.022238	1.51186
TCONS_00006219	1.81095	8.6727	9.01339	0.000190903	0.022238	1.51122
ENST00000429151	-1.95491	8.32212	-9.0008	0.000192265	0.022238	1.50458
NR_045667	1.82511	8.56779	8.99965	0.000192391	0.022238	1.50397
ENST00000522132	1.84161	6.02654	8.99744	0.000192632	0.022238	1.50281
TCONS_00019803	1.88215	7.15989	8.99667	0.000192716	0.022238	1.5024
uc001azk.2	-2.10892	9.21892	-8.99656	0.000192727	0.022238	1.50234
ENST00000565327	1.80785	6.7208	8.99559	0.000192833	0.022238	1.50183
ENST00000426067	1.81594	6.62034	8.99432	0.000192972	0.022238	1.50116
ENST00000525133	2.34778	7.54017	8.97626	0.000194955	0.022238	1.49161
TCONS_00005051	1.86986	8.62853	8.96548	0.00019615	0.022238	1.48589
ENST00000419069	1.96932	7.54455	8.93241	0.000199871	0.022238	1.46831
ENST00000537525	1.81308	7.48706	8.91592	0.000201757	0.022238	1.45951
TCONS_00019475	1.81818	5.63185	8.91232	0.000202173	0.022238	1.45759
uc021qoq.1	-1.80424	5.54939	-8.90215	0.000203349	0.022238	1.45215
ENST00000546981	1.82076	6.49538	8.90131	0.000203446	0.022238	1.4517
TCONS_00023667	1.83033	8.65881	8.89868	0.000203753	0.022238	1.45029
ENST00000559654	1.83838	8.82408	8.89542	0.000204132	0.022238	1.44855
ENST00000426364	2.06139	6.04234	8.88984	0.000204784	0.022238	1.44556
ENST00000444800	1.99568	6.23284	8.88605	0.000205228	0.022238	1.44352
ENST00000425205	1.83177	7.41381	8.86379	0.00020786	0.022238	1.43156
ENST00000561909	1.7876	6.9427	8.85228	0.000209237	0.022238	1.42537
AV731389	-2.30035	6.511	-8.84658	0.000209922	0.022238	1.4223
ENST00000406231	-1.95443	6.522	-8.8292	0.00021203	0.022238	1.41291
chr12:53675775-53689275-	2.23053	8.58737	8.82638	0.000212373	0.022238	1.41138
ENST00000531077	1.85302	10.8754	8.80002	0.000215623	0.022238	1.3971
chr11:113400350-113410875-	-1.90695	6.84248	-8.78132	0.000217963	0.022238	1.38693
ENST00000315776	-1.88736	8.73458	-8.77686	0.000218526	0.022238	1.3845
TCONS_00002581	1.76723	6.12866	8.76774	0.000219682	0.022238	1.37953
ENST00000568097	1.86082	8.76949	8.76716	0.000219756	0.022238	1.37921
uc003jms.1	1.76333	9.36689	8.76377	0.000220187	0.022238	1.37737
ENST00000584339	1.74543	5.31002	8.72968	0.000224584	0.022238	1.35871
NR_024560	1.84745	10.3716	8.7248	0.000225222	0.022238	1.35604
ENST00000504636	1.74946	6.35882	8.72259	0.000225511	0.022238	1.35482
TCONS_00021993	1.78917	7.04532	8.72143	0.000225663	0.022238	1.35419
ENST00000567395	1.89078	7.18997	8.7137	0.00022668	0.022238	1.34994
ENST00000421320	1.75693	8.55845	8.69231	0.000229522	0.022238	1.33817
uc002mij.2	1.9481	6.98367	8.69057	0.000229755	0.022238	1.33721
ENST00000566929	1.88647	5.16316	8.67719	0.000231556	0.022238	1.32983
NR_026662	-2.19123	5.62983	-8.65377	0.00023475	0.022238	1.31686
ENST00000432032	1.93019	9.67223	8.64362	0.00023615	0.022238	1.31123
TCONS_00009989	1.77392	5.68062	8.63011	0.000238027	0.022238	1.30373
ENST00000582990	1.72851	8.30223	8.62706	0.000238454	0.022238	1.30203
TCONS_00014916	-1.85437	7.32079	-8.62257	0.000239083	0.022238	1.29953
TCONS_00023943	1.76712	7.37232	8.59529	0.00024295	0.022238	1.28432
ENST00000418743	1.77917	8.30953	8.58231	0.000244816	0.022238	1.27705
ENST00000564862	-1.8386	5.91991	-8.57812	0.000245422	0.022238	1.27471
NR_027428	1.72054	6.76953	8.57412	0.000246002	0.022238	1.27247
ENST00000430178	-1.88146	8.75546	-8.56346	0.000247556	0.022238	1.26648
TCONS_00014011	1.79555	7.58963	8.522	0.000253709	0.022238	1.24314
TCONS_00011947	-2.01187	5.11361	-8.52055	0.000253927	0.022238	1.24232
TCONS_00021505	-2.14001	6.80659	-8.49298	0.000258123	0.022238	1.22671
CD514953	-1.79459	5.85974	-8.46069	0.000263141	0.022238	1.20836
ENST00000569752	1.72885	9.48207	8.45688	0.00026374	0.022238	1.20619
ENST00000432162	1.85021	6.86037	8.45497	0.000264041	0.022238	1.2051
ENST00000501818	1.70859	8.0809	8.4541	0.000264178	0.022238	1.2046
ENST00000441272	1.70858	8.51321	8.45233	0.000264457	0.022238	1.20359
ENST00000436492	-1.87774	7.46234	-8.44294	0.000265947	0.022238	1.19823
TCONS_00022761	1.74172	10.3987	8.43545	0.000267142	0.022238	1.19395
HMlincRNA1103+	-1.79613	6.53683	-8.43265	0.00026759	0.022238	1.19235
NR_036442	-2.28735	5.71847	-8.4061	0.000271885	0.022238	1.17714
ENST00000415661	1.80847	8.43712	8.40218	0.000272527	0.022238	1.17488
ENST00000567668	1.76603	10.5249	8.39249	0.000274118	0.022238	1.16931
TCONS_00013806	1.7868	7.96569	8.39202	0.000274197	0.022238	1.16904
ENST00000439558	-1.75564	7.09333	-8.39189	0.000274218	0.022238	1.16897
AA584156	-1.74291	8.16862	-8.3755	0.000276938	0.022238	1.15952
TCONS_00019998	1.68945	6.87541	8.37327	0.00027731	0.022238	1.15824
uc010nwj.3	1.67676	6.6221	8.35649	0.000280131	0.022238	1.14855
ENST00000441773	-1.70197	9.25431	-8.35534	0.000280325	0.022238	1.14788
TCONS_00018150	1.73019	8.6249	8.35447	0.000280472	0.022238	1.14738
ENST00000455671	1.73116	8.9145	8.35313	0.0002807	0.022238	1.1466
ENST00000424982	1.66974	9.15208	8.3484	0.000281503	0.022238	1.14387
uc010ocg.1	-2.15807	6.71895	-8.34782	0.000281601	0.022238	1.14353
ENST00000533590	1.66923	8.81705	8.34555	0.000281989	0.022238	1.14221
NR_028327	-1.9618	6.00093	-8.34274	0.000282468	0.022238	1.14058
chr10:44057525-44069225+	1.77167	7.71802	8.34149	0.000282682	0.022238	1.13986
ENST00000275590	1.71902	8.4392	8.3364	0.000283553	0.022238	1.13691
TCONS_00016583	1.68242	9.08884	8.33466	0.000283851	0.022238	1.1359
uc002edq.3	2.01844	10.02	8.32873	0.000284872	0.022238	1.13246
ENST00000444663	1.66752	8.7024	8.32058	0.000286283	0.022238	1.12772
TCONS_00023648	1.66901	6.89916	8.31913	0.000286534	0.022238	1.12688
chr1:54356225-54366425+	1.95646	7.18623	8.31791	0.000286745	0.022238	1.12617
TCONS_00003962	1.6893	9.07807	8.31695	0.000286912	0.022238	1.12562
ENST00000444862	1.81812	5.02108	8.31486	0.000287276	0.022238	1.1244
ENST00000440801	-1.78494	7.51294	-8.31171	0.000287827	0.022238	1.12256
ENST00000520496	2.14227	8.48671	8.29628	0.000290535	0.022238	1.11357
ENST00000424313	2.09342	10.3437	8.29173	0.000291339	0.022238	1.11092
TCONS_00013542	1.70441	7.20006	8.2904	0.000291576	0.022238	1.11014
ENST00000431307	-1.65808	9.05562	-8.28212	0.000293047	0.022238	1.10531
ENST00000425939	2.1839	7.83673	8.27067	0.000295097	0.022238	1.09861
ENST00000490269	-1.66768	6.95774	-8.27066	0.0002951	0.022238	1.0986
ENST00000431095	1.69226	5.57745	8.26885	0.000295424	0.022238	1.09754
ENST00000558967	-1.74724	7.09304	-8.26497	0.000296124	0.022238	1.09527
ENST00000579095	1.70608	9.48377	8.2636	0.000296372	0.022238	1.09446
ENST00000358393	-2.12138	11.0663	-8.25813	0.000297361	0.022238	1.09126
TCONS_00019425	1.96926	6.89996	8.24497	0.00029976	0.022238	1.08353
TCONS_00008278	1.78904	7.07778	8.23718	0.000301192	0.022238	1.07895
HMlincRNA825-	1.66372	7.75298	8.22737	0.000303003	0.022238	1.07318
TCONS_00015151	1.87959	5.19732	8.22462	0.000303515	0.022238	1.07156
ENST00000431432	-1.86253	5.24057	-8.22222	0.00030396	0.022238	1.07015
TCONS_00015168	1.67157	7.55966	8.22032	0.000304315	0.022238	1.06902
AV722915	1.76776	10.8078	8.2148	0.000305346	0.022238	1.06577
ENST00000527426	1.64858	9.50624	8.20037	0.00030806	0.022238	1.05724
ENST00000510509	-1.81027	7.98624	-8.19412	0.000309244	0.022238	1.05354
ENST00000521507	-1.75179	9.07469	-8.19232	0.000309587	0.022238	1.05247
TCONS_00012639	-1.71495	6.76599	-8.1744	0.000313017	0.022238	1.04185
ENST00000412381	-1.85841	7.02741	-8.17407	0.000313081	0.022238	1.04165
TCONS_00028111	-1.85515	8.35465	-8.16258	0.000315304	0.022238	1.03483
chr1:105438075-105481400-	1.6784	7.7417	8.15585	0.000316615	0.022238	1.03082
NR_029415	-1.69169	7.15149	-8.15437	0.000316904	0.022238	1.02994
ENST00000442627	1.88699	5.25561	8.15171	0.000317425	0.022238	1.02836
ENST00000434273	1.67014	10.5674	8.14958	0.000317842	0.022238	1.02709
TCONS_00014873	1.63027	7.47858	8.14253	0.000319228	0.022238	1.02289
ENST00000419481	1.63492	9.58981	8.14202	0.00031933	0.022238	1.02258
NR_024389	-1.71826	4.72532	-8.14168	0.000319397	0.022238	1.02238
TCONS_00025086	1.64228	7.96095	8.14152	0.000319427	0.022238	1.02229
ENST00000446741	1.63123	7.18824	8.131	0.000321512	0.022238	1.016
ENST00000428429	-1.68259	6.57777	-8.12635	0.000322436	0.022238	1.01323
ENST00000510550	1.63206	7.04673	8.1247	0.000322767	0.022238	1.01224
ENST00000562268	1.79976	4.83918	8.12103	0.000323501	0.022238	1.01004
TCONS_00027397	-1.63303	5.20861	-8.10818	0.000326085	0.022238	1.00235
ENST00000456037	1.6554	5.29488	8.10029	0.000327686	0.022238	0.997616
ENST00000428244	-1.72568	7.61199	-8.09423	0.00032892	0.022238	0.993981
BQ448447	1.85304	6.35978	8.09203	0.000329369	0.022238	0.99266
ENST00000436845	1.75304	8.87359	8.08743	0.000330312	0.022238	0.989895
TCONS_00016488	-1.75913	4.90346	-8.08334	0.000331152	0.022238	0.987436
ENST00000454490	1.65464	6.8091	8.08073	0.000331691	0.022238	0.985862
ENST00000514619	1.64685	11.2766	8.07908	0.000332031	0.022238	0.984871
ENST00000585275	1.63521	9.02884	8.07898	0.000332051	0.022238	0.984812
TCONS_00013641	-1.71096	7.13038	-8.07474	0.000332927	0.022238	0.982261
TCONS_00019506	-1.78648	5.8896	-8.06702	0.000334531	0.022238	0.977607
BF377574R	-1.64243	7.17652	-8.06698	0.00033454	0.022238	0.977581
NR_038217	-1.72122	6.47161	-8.06233	0.00033551	0.022238	0.974778
ENST00000457760	-1.67091	9.08732	-8.05894	0.000336219	0.022238	0.972731
ENST00000548135	1.81788	6.72566	8.0489	0.00033833	0.022238	0.966669
ENST00000413794	-1.87631	6.23053	-8.03906	0.000340416	0.022238	0.960712
ENST00000582752	1.60889	8.55884	8.0358	0.000341109	0.022238	0.958738
ENST00000466740	-1.9702	7.41277	-8.03385	0.000341525	0.022238	0.957557
uc003ifc.3	1.68124	9.80582	8.02723	0.000342941	0.022238	0.953545
ENST00000436488	1.70121	9.78962	8.02706	0.000342977	0.022238	0.953442
ENST00000412838	1.64434	7.83094	8.0261	0.000343184	0.022238	0.952859
ENST00000499583	1.60704	6.29075	8.02551	0.00034331	0.022238	0.952502
HMlincRNA1607+	1.70673	5.74225	8.01239	0.00034614	0.022238	0.944538
TCONS_00021370	-1.6804	6.43524	-8.0076	0.000347182	0.022238	0.941621
ENST00000444220	-1.63995	8.25968	-8.00581	0.000347572	0.022238	0.940532
uc001vwd.3	1.60126	5.85223	8.00336	0.000348105	0.022238	0.939044
ENST00000414596	-1.66294	6.7137	-8.00178	0.00034845	0.022238	0.938082
AK093610	1.91521	6.4314	7.99238	0.000350511	0.022238	0.932356
ENST00000581648	1.59968	7.2572	7.98988	0.000351061	0.022238	0.930834
ENST00000540625	1.80085	7.04741	7.98534	0.000352063	0.022238	0.928065
TCONS_00013620	2.02169	9.36133	7.9648	0.000356641	0.022238	0.915512
ENST00000441672	1.64711	8.25222	7.96313	0.000357016	0.022238	0.91449
ENST00000570024	1.69536	8.48652	7.96091	0.000357515	0.022238	0.913133
ENST00000418821	1.61608	7.0109	7.95635	0.000358543	0.022238	0.910339
TCONS_00019653	-2.14698	6.13595	-7.95051	0.000359865	0.022238	0.90676
ENST00000452528	1.61524	9.80175	7.94721	0.000360616	0.022238	0.904734
ENST00000523884	-1.772	4.7396	-7.94404	0.000361337	0.022238	0.902789
TCONS_00004125	1.65864	8.48736	7.94278	0.000361624	0.022238	0.902016
TCONS_00016212	2.06109	7.74535	7.93403	0.000363628	0.022238	0.896639
ENST00000415582	-1.92179	5.7258	-7.92969	0.000364626	0.022238	0.893973
NR_033854	1.65203	8.79764	7.92373	0.000366004	0.022238	0.8903
ENST00000503037	1.65431	5.53004	7.92173	0.000366467	0.022238	0.88907
NR_047684	1.60552	7.40099	7.91953	0.000366977	0.022238	0.887716
ENST00000514843	1.63721	7.17831	7.91515	0.000367996	0.022238	0.885015
ENST00000423629	2.089	6.5818	7.8943	0.00037289	0.022238	0.872145
chr14:101121575-101132150-	-1.6031	7.11241	-7.89098	0.000373677	0.022238	0.870089
TCONS_00023722	1.59319	7.99543	7.88813	0.000374353	0.022238	0.868328
ENST00000499554	1.68505	8.27746	7.88627	0.000374796	0.022238	0.867175
TCONS_00003908	-1.72687	5.87467	-7.88619	0.000374814	0.022238	0.867127
ENST00000545731	1.58358	9.87231	7.88554	0.000374969	0.022238	0.866724
TCONS_00001181	-1.85048	8.86619	-7.88264	0.00037566	0.022238	0.86493
ENST00000513631	1.67624	5.15443	7.88199	0.000375816	0.022238	0.864525
TCONS_00018277	1.63739	5.0017	7.88155	0.000375919	0.022238	0.864257
uc002rvb.3	1.78029	7.04455	7.87638	0.000377158	0.022238	0.861049
uc.85+	-2.12083	6.12495	-7.86868	0.000379009	0.022238	0.856274
TCONS_00013900	-1.77519	8.31118	-7.85668	0.000381915	0.022238	0.848821
uc009vjs.1	1.63703	5.28056	7.85512	0.000382295	0.022238	0.847849
TCONS_00026972	-1.70451	6.24483	-7.8538	0.000382617	0.022238	0.847029
TCONS_00021409	-1.73073	9.44757	-7.85207	0.00038304	0.022238	0.845951
TCONS_00009190	-1.95947	11.8451	-7.84983	0.000383585	0.022238	0.844562
TCONS_00029720	-2.1004	5.64576	-7.83454	0.000387346	0.022238	0.835034
ENST00000561358	1.59708	6.20897	7.8294	0.00038862	0.022238	0.831829
ENST00000417510	-2.21759	10.4828	-7.81939	0.000391115	0.022238	0.825575
ENST00000452834	1.57318	5.46238	7.81892	0.000391233	0.022238	0.825279
TCONS_00024434	-1.93185	5.69288	-7.81192	0.000392988	0.022238	0.820905
HMlincRNA1397+	1.80153	7.29942	7.81192	0.000392989	0.022238	0.820903
uc003kuo.3	1.56687	8.5985	7.80467	0.000394819	0.022238	0.816362
ENST00000380981	-1.84093	7.54926	-7.80331	0.000395161	0.022238	0.815513
TCONS_00018449	-2.00126	7.12517	-7.80185	0.000395532	0.022238	0.814595
ENST00000454426	1.62983	8.53673	7.79811	0.000396483	0.022238	0.812249
ENST00000417213	1.80198	7.94914	7.79173	0.000398107	0.022238	0.80825
NR_033711	-1.99309	7.38283	-7.78127	0.000400791	0.022238	0.801677
ENST00000465795	1.66037	5.91334	7.7808	0.000400912	0.022238	0.80138
ENST00000424640	1.62348	5.74746	7.77573	0.00040222	0.022238	0.798192
TCONS_00028427	1.68101	5.01305	7.77144	0.000403329	0.022238	0.795497
NR_033302	-1.55813	6.08652	-7.76462	0.000405102	0.022238	0.791201
ENST00000570835	1.71763	5.56425	7.76459	0.000405111	0.022238	0.79118
ENST00000431097	-1.86604	5.37574	-7.7632	0.000405473	0.022238	0.790306
ENST00000573935	1.60349	7.49023	7.75841	0.000406726	0.022238	0.787284
ENST00000520085	-2.10414	12.4467	-7.75813	0.000406798	0.022238	0.787111
NR_038399	1.76239	5.4905	7.74714	0.00040969	0.022238	0.780172
TCONS_00017455	1.58156	9.08763	7.74502	0.000410251	0.022238	0.778831
ENST00000568775	1.56382	7.23255	7.73786	0.000412151	0.022238	0.774303
ENST00000552418	1.6571	5.62565	7.73728	0.000412305	0.022238	0.773937
uc002ags.1	-1.85812	7.09775	-7.73691	0.000412402	0.022238	0.773705
ENST00000562782	-1.71311	9.80649	-7.73491	0.000412935	0.022238	0.772439
chr10:102320175-102331900-	-2.20321	6.03793	-7.73145	0.000413859	0.022238	0.770248
TCONS_00006208	-1.54852	8.15717	-7.72902	0.00041451	0.022238	0.768707
ENST00000440189	2.00775	6.62133	7.72516	0.000415544	0.022238	0.766264
TCONS_00023573	1.62197	10.5855	7.72276	0.000416191	0.022238	0.764738
ENST00000518779	-1.79235	6.83748	-7.71651	0.000417875	0.022238	0.760778
HMlincRNA51+	1.57221	6.93923	7.71496	0.000418296	0.022238	0.759791
ENST00000428440	1.66671	5.70945	7.70951	0.000419773	0.022238	0.756332
ENST00000535440	-1.70608	7.16287	-7.70209	0.000421796	0.022238	0.751616
TCONS_00006193	-1.65141	5.92188	-7.69899	0.000422643	0.022238	0.749647
NR_038409	1.54591	5.86929	7.69866	0.000422734	0.022238	0.749436
TCONS_00013447	-2.00458	6.33831	-7.69273	0.000424363	0.022238	0.74566
ENST00000554245	1.57475	5.25734	7.68858	0.000425509	0.022238	0.743013
ENST00000441570	1.66721	12.5845	7.68405	0.000426761	0.022238	0.740127
ENST00000573860	1.55806	4.90859	7.68347	0.000426921	0.022238	0.739759
NR_024620	-2.20248	5.31029	-7.6829	0.00042708	0.022238	0.739394
ENST00000514201	1.84631	8.7291	7.68152	0.000427462	0.022238	0.738516
ENST00000481582	1.55554	7.00049	7.68071	0.000427688	0.022238	0.737997
ENST00000580780	1.62999	5.84689	7.67965	0.000427982	0.022238	0.737321
uc.400-	-1.81719	6.90383	-7.67716	0.000428675	0.022238	0.735732
TCONS_00024026	-1.6235	5.46633	-7.67631	0.00042891	0.022238	0.735193
ENST00000432994	1.54997	7.77242	7.67537	0.000429173	0.022238	0.734592
ENST00000537965	1.54819	8.33822	7.6736	0.000429668	0.022238	0.73346
ENST00000567002	1.5377	8.22132	7.67288	0.000429869	0.022238	0.733001
ENST00000433012	-2.13337	6.29609	-7.6717	0.000430198	0.022238	0.732249
TCONS_00024701	1.60236	8.6087	7.66948	0.000430821	0.022238	0.730826
ENST00000422082	1.5593	5.74361	7.66772	0.000431315	0.022238	0.7297
ENST00000548030	-1.83024	9.17213	-7.66704	0.000431504	0.022238	0.729271
ENST00000447250	1.66761	8.10444	7.65768	0.000434141	0.022238	0.723282
ENST00000330048	-1.88874	8.40891	-7.65598	0.000434623	0.022238	0.722193
NR_038864	1.68153	7.89711	7.64631	0.00043737	0.022238	0.715997
ENST00000522471	-1.57105	4.67579	-7.64256	0.000438442	0.022238	0.71359
ENST00000420549	1.59704	7.59583	7.64155	0.000438729	0.022238	0.712946
ENST00000524338	-1.69349	6.70821	-7.63941	0.000439342	0.022238	0.711572
ENST00000582093	-2.01797	6.56856	-7.63773	0.000439826	0.022238	0.71049
ENST00000435444	-1.65958	7.41985	-7.62517	0.000443447	0.022238	0.702423
TCONS_00028267	-1.90872	7.66157	-7.6226	0.000444193	0.022238	0.700768
NR_033664	-1.90563	6.57926	-7.61603	0.000446106	0.022238	0.696539
ENST00000523063	1.67839	7.12181	7.61436	0.000446594	0.022238	0.695464
NR_028302	-1.59205	8.39036	-7.61361	0.000446812	0.022238	0.694983
ENST00000521055	-1.6405	8.30783	-7.60356	0.000449765	0.022238	0.688498
ENST00000558427	1.90514	6.52384	7.6022	0.000450164	0.022238	0.687623
chr2:68059800-68077075+	-1.66194	8.71395	-7.59639	0.000451883	0.022238	0.683869
uc003lqr.3	-1.6205	6.94753	-7.5946	0.000452413	0.022238	0.682714
ENST00000482003	1.55019	7.47028	7.59438	0.000452479	0.022238	0.682571
CV329709	1.65049	5.44634	7.59418	0.000452537	0.022238	0.682444
TCONS_00006092	1.59776	9.44581	7.59278	0.000452954	0.022238	0.681537
ENST00000506717	1.61554	6.28036	7.59061	0.000453599	0.022238	0.680136
ENST00000455128	1.54691	7.72289	7.58945	0.000453945	0.022238	0.679384
ENST00000418607	-1.78292	6.48483	-7.58411	0.000455538	0.022238	0.675933
NR_033861	-1.78416	8.89525	-7.58243	0.00045604	0.022238	0.674847
TCONS_00010341	-1.88979	6.60921	-7.58143	0.00045634	0.022238	0.674198
ENST00000444499	1.73285	6.45904	7.5729	0.000458906	0.022238	0.668671
ENST00000549359	1.57312	6.89023	7.57243	0.000459049	0.022238	0.668365
TCONS_00004595	-1.62682	8.30722	-7.57201	0.000459175	0.022238	0.668094
ENST00000420237	1.54912	7.44157	7.5679	0.000460417	0.022238	0.66543
NR_046769	-1.92937	5.56072	-7.56749	0.000460541	0.022238	0.665165
ENST00000432418	1.5995	9.19479	7.56635	0.000460888	0.022238	0.664422
ENST00000563472	-1.75924	5.99372	-7.56567	0.000461092	0.022238	0.663985
ENST00000507934	1.53473	6.74866	7.56561	0.000461111	0.022238	0.663944
ENST00000521148	1.85203	8.17644	7.56332	0.000461808	0.022238	0.662457
TCONS_00007999	-1.5748	5.28177	-7.55259	0.000465083	0.022238	0.655485
AL713779R	1.72357	8.61742	7.54395	0.000467739	0.022238	0.649866
ENST00000452766	1.55441	7.31147	7.54238	0.000468222	0.022238	0.648847
TCONS_00004320	1.72671	6.236	7.53898	0.000469275	0.022238	0.646631
TCONS_00021431	-2.08688	6.10462	-7.52891	0.000472404	0.022238	0.640069
ENST00000417786	-1.68952	4.87225	-7.52497	0.000473638	0.022238	0.637494
ENST00000583161	-1.56835	6.58823	-7.52459	0.000473756	0.022238	0.637247
uc009vjd.2	-1.59697	5.49932	-7.51263	0.000477518	0.022238	0.629434
TCONS_00025566	1.65092	6.80486	7.51246	0.000477573	0.022238	0.629321
ENST00000560727	1.57378	7.43604	7.51187	0.000477759	0.022238	0.628937
ENST00000438401	1.60613	9.66122	7.51102	0.000478028	0.022238	0.62838
ENST00000419624	-1.54761	5.59993	-7.50919	0.000478607	0.022238	0.627184
ENST00000444982	1.72022	5.95023	7.50759	0.000479114	0.022238	0.626139
ENST00000438380	-1.5389	5.56497	-7.50476	0.000480013	0.022238	0.624286
ENST00000435257	1.50351	5.50261	7.50298	0.000480581	0.022238	0.623118
HMlincRNA1302+	-1.9205	7.34037	-7.50269	0.000480672	0.022238	0.622931
ENST00000562525	-1.71595	6.68547	-7.49674	0.000482574	0.022238	0.619026
R82333	1.68577	8.35263	7.48962	0.000484856	0.022238	0.614363
ENST00000419664	-2.35468	8.56238	-7.47479	0.000489658	0.022238	0.604617
NR_046111	1.56354	6.57729	7.47342	0.000490103	0.022238	0.603718
ENST00000425776	-1.78251	7.54672	-7.47309	0.00049021	0.022238	0.603502
ENST00000577140	1.60956	6.54882	7.47236	0.00049045	0.022238	0.603016
ENST00000448475	-1.50319	7.74001	-7.47058	0.00049103	0.022238	0.601848
ENST00000536492	-1.61846	4.94528	-7.47033	0.000491111	0.022238	0.601686
TCONS_00026338	1.53093	6.69557	7.46326	0.000493427	0.022238	0.597029
uc002shv.1	1.55656	6.39959	7.4632	0.000493447	0.022238	0.596988
chr5:158012750-158032025-	1.51395	6.4184	7.46255	0.000493662	0.022238	0.596558
ENST00000433388	1.51834	7.61313	7.46088	0.00049421	0.022238	0.595461
ENST00000561577	-1.58741	5.08068	-7.46017	0.000494444	0.022238	0.594992
ENST00000433000	-1.63426	4.86951	-7.45922	0.000494758	0.022238	0.594364
ENST00000488310	1.61519	8.27795	7.4589	0.000494861	0.022238	0.594157
ENST00000452657	1.58695	6.73016	7.45378	0.000496553	0.022238	0.590779
ENST00000449215	-1.75489	8.7026	-7.45208	0.000497116	0.022238	0.589657
ENST00000511241	1.82042	8.5968	7.44823	0.000498392	0.022238	0.587118
ENST00000519499	1.54926	7.15394	7.44108	0.000500777	0.022238	0.582392
uc010azc.3	-2.23812	6.93503	-7.43774	0.000501895	0.022238	0.580183
ENST00000564048	1.59574	7.43607	7.4363	0.000502376	0.022238	0.579234
TCONS_00004167	1.51655	8.93083	7.43464	0.000502933	0.022238	0.578136
ENST00000563243	1.49199	5.48367	7.43445	0.000502999	0.022238	0.578006
uc021sxw.1	1.5643	7.43533	7.43368	0.000503256	0.022238	0.5775
TCONS_00022208	1.50466	8.43828	7.43345	0.000503333	0.022238	0.577349
TCONS_00009928	-1.60012	5.93845	-7.42321	0.000506789	0.022238	0.570568
HMlincRNA1110-	2.31325	6.31201	7.42119	0.000507474	0.022238	0.56923
ENST00000573207	-1.74385	5.89507	-7.41861	0.00050835	0.022238	0.567519
ENST00000574271	1.61357	7.09693	7.41704	0.000508887	0.022238	0.566473
ENST00000448374	1.78692	7.32462	7.41687	0.000508943	0.022238	0.566364
ENST00000559029	1.64642	5.44807	7.41562	0.00050937	0.022238	0.565533
ENST00000456335	-1.69412	6.9566	-7.41465	0.0005097	0.022238	0.564892
ENST00000450540	1.61103	7.94314	7.41317	0.000510206	0.022238	0.563907
uc001ldk.2	-1.57752	6.56453	-7.41154	0.000510763	0.022238	0.562825
ENST00000414603	-1.7623	7.07256	-7.40831	0.000511869	0.022238	0.560682
TCONS_00018138	-1.59734	5.14113	-7.40698	0.000512323	0.022238	0.559802
uc021wlh.1	-1.69715	8.68207	-7.40564	0.000512784	0.022238	0.55891
ENST00000517854	1.59924	7.94051	7.4003	0.000514625	0.022238	0.555357
ENST00000522571	1.48555	8.76124	7.40001	0.000514724	0.022238	0.555167
ENST00000503394	-1.50026	5.8114	-7.39408	0.000516775	0.022238	0.551221
TCONS_00004230	1.62684	5.86603	7.3922	0.000517426	0.022238	0.549973
uc001lsr.1	1.54158	9.26204	7.38906	0.00051852	0.022238	0.547877
ENST00000575554	1.57922	6.84383	7.38846	0.000518727	0.022238	0.547482
ENST00000457372	1.50678	5.19736	7.38194	0.000521005	0.022238	0.543133
TCONS_00004473	1.50616	6.7539	7.37967	0.000521799	0.022238	0.541622
ENST00000571595	-1.80285	12.293	-7.37485	0.000523492	0.022238	0.538407
NR_038410	1.5526	5.65374	7.3734	0.000524003	0.022238	0.537439
ENST00000568093	1.49298	6.20624	7.37223	0.000524415	0.022238	0.536657
uc009wjy.1	-1.68734	5.36213	-7.36811	0.000525872	0.022238	0.533904
ENST00000451511	1.52465	6.73978	7.36708	0.000526237	0.022238	0.533214
ENST00000429698	-1.7268	11.0169	-7.3658	0.000526689	0.022238	0.532361
ENST00000416842	-1.47166	5.35908	-7.35899	0.000529111	0.022238	0.527805
ENST00000442416	-1.5656	8.78711	-7.35752	0.000529636	0.022238	0.526821
BU663707	1.48987	8.79557	7.35742	0.000529672	0.022238	0.526754
ENST00000415549	-1.63889	5.17527	-7.35741	0.000529674	0.022238	0.52675
NR_045213	1.55019	8.64324	7.35524	0.000530451	0.022238	0.525294
uc010utw.1	-1.55513	9.52789	-7.34703	0.000533396	0.022238	0.519794
ENST00000518943	1.47596	7.69834	7.34671	0.00053351	0.022238	0.519581
ENST00000556144	1.61638	13.0767	7.34574	0.000533858	0.022238	0.518932
TCONS_00013981	-1.57127	5.55546	-7.34542	0.000533975	0.022238	0.518715
ENST00000447181	1.59275	6.22399	7.34528	0.000534023	0.022238	0.518626
ENST00000537478	1.56663	7.01454	7.33906	0.00053627	0.022238	0.514453
ENST00000359455	-1.53215	6.9431	-7.33617	0.000537317	0.022238	0.512515
TCONS_00019406	-1.57392	6.58434	-7.33602	0.000537374	0.022238	0.512409
ENST00000437696	-1.55006	8.13819	-7.33286	0.000538522	0.022238	0.510288
ENST00000581532	-1.76857	5.32493	-7.31725	0.000544238	0.022238	0.499791
TCONS_00001640	-1.54838	6.24222	-7.31558	0.000544853	0.022238	0.498666
ENST00000421170	1.46892	6.31089	7.3148	0.000545139	0.022238	0.498144
chr2:148061475-148073025+	1.46903	7.4502	7.31273	0.000545905	0.022238	0.496748
HMlincRNA1584-	1.65932	6.53081	7.31005	0.000546895	0.022238	0.494945
TCONS_00017420	1.49049	6.05392	7.30981	0.000546986	0.022238	0.494779
TCONS_00008726	-1.59061	5.00814	-7.30514	0.000548718	0.022238	0.491634
ENST00000452788	1.53818	7.28689	7.30508	0.000548741	0.022238	0.491593
TCONS_00017254	1.49891	6.05868	7.29953	0.000550808	0.022238	0.487851
TCONS_00013985	1.50219	7.8286	7.29934	0.000550883	0.022238	0.487717
chr14:75090375-75100625+	-1.51748	6.44267	-7.29276	0.000553347	0.022238	0.483274
uc002igh.3	-1.90695	9.97585	-7.29271	0.000553365	0.022238	0.483243
TCONS_00001623	1.60344	5.12474	7.29121	0.000553929	0.022238	0.482228
TCONS_00010707	1.47178	5.77917	7.28835	0.000555006	0.022238	0.480295
ENST00000510225	1.64447	7.66504	7.28833	0.000555012	0.022238	0.480284
TCONS_00023094	1.72782	5.25344	7.28642	0.000555734	0.022238	0.478988
TCONS_00028182	1.54726	5.32116	7.28453	0.000556449	0.022238	0.477709
uc001kra.4	1.55598	9.59291	7.28441	0.000556491	0.022238	0.477633
ENST00000478959	1.56521	4.80843	7.28157	0.00055757	0.022238	0.475706
ENST00000456728	1.55196	7.6333	7.28056	0.000557951	0.022238	0.475025
TCONS_00011070	1.66581	5.41225	7.28009	0.000558129	0.022238	0.474707
ENST00000412595	1.48673	6.62332	7.27631	0.000559565	0.022238	0.472148
HMlincRNA457-	1.51154	5.47374	7.27391	0.000560478	0.022238	0.470524
ENST00000415590	-1.4693	6.26284	-7.27082	0.000561658	0.022238	0.468429
ENST00000418925	-1.45416	9.08225	-7.26806	0.000562715	0.022238	0.466557
TCONS_00027064	1.64738	9.00288	7.26579	0.000563587	0.022238	0.465014
TCONS_00015092	1.48126	6.97544	7.25874	0.000566298	0.022238	0.460232
ENST00000509950	1.51567	5.27752	7.25741	0.000566811	0.022238	0.45933
ENST00000566225	1.46283	6.08363	7.253	0.000568518	0.022238	0.456334
ENST00000566475	-1.48894	7.96601	-7.25127	0.00056919	0.022238	0.455155
ENST00000457169	1.53899	5.39468	7.25031	0.000569562	0.022238	0.454505
ENST00000431376	1.52563	8.35936	7.24215	0.000572744	0.022238	0.448949
ENST00000555361	-1.74713	6.80165	-7.23862	0.000574125	0.022238	0.446548
NR_051976	1.55707	6.33566	7.23822	0.000574283	0.022238	0.446274
ENST00000517897	1.80374	6.36321	7.2374	0.000574606	0.022238	0.445714
chr8:20622500-20634450-	-1.84338	6.38727	-7.23616	0.00057509	0.022238	0.444873
ENST00000577781	1.44977	7.83195	7.23563	0.000575301	0.022238	0.444508
ENST00000561923	1.44721	6.8712	7.23034	0.000577383	0.022238	0.440905
ENST00000416351	1.50612	10.27	7.22722	0.000578617	0.022238	0.438776
ENST00000577181	1.47437	8.63087	7.22567	0.00057923	0.022238	0.437719
TCONS_00023868	1.51365	6.66277	7.22277	0.000580383	0.022238	0.435735
ENST00000559400	1.50748	6.16144	7.22064	0.000581227	0.022238	0.434285
TCONS_00001807	-1.67157	8.45574	-7.21976	0.000581577	0.022238	0.433684
uc004azy.1	1.59016	8.69988	7.21709	0.000582644	0.022238	0.431856
ENST00000548964	-1.67952	8.77522	-7.2167	0.000582798	0.022238	0.431592
ENST00000523050	1.67332	10.6162	7.21368	0.000584004	0.022238	0.429529
HMlincRNA1049-	1.68998	6.59156	7.21251	0.000584474	0.022238	0.428726
ENST00000512398	1.49135	5.96296	7.20974	0.000585582	0.022238	0.426835
TCONS_00022685	1.62247	7.67289	7.20759	0.000586447	0.022238	0.425362
ENST00000499587	-1.46254	7.31071	-7.20559	0.000587252	0.022238	0.423993
chr3:188521875-188539200+	1.45545	6.73844	7.20214	0.000588644	0.022238	0.421629
ENST00000547845	-1.47893	10.2488	-7.19941	0.000589748	0.022238	0.419758
NR_028502	-1.53402	9.12369	-7.19627	0.000591018	0.022238	0.41761
ENST00000560973	1.62039	7.58924	7.1804	0.000597498	0.022238	0.406718
ENST00000446887	1.50641	8.1753	7.17986	0.000597719	0.022238	0.406348
ENST00000544421	1.53555	5.86154	7.17933	0.000597939	0.022238	0.405981
ENST00000437350	-1.53881	7.13663	-7.17798	0.000598493	0.022238	0.405056
ENST00000572284	1.46591	8.79744	7.17748	0.0005987	0.022238	0.40471
ENST00000426946	1.64359	5.64265	7.17559	0.000599478	0.022238	0.403412
NR_036488	-1.51016	9.8129	-7.17274	0.000600655	0.022238	0.401453
ENST00000422374	1.58074	9.92	7.17183	0.000601031	0.022238	0.400827
ENST00000445199	-1.71368	5.32007	-7.17151	0.000601163	0.022238	0.400607
ENST00000541673	1.47563	9.42469	7.16895	0.000602224	0.022238	0.398844
ENST00000547094	1.44565	6.03366	7.16875	0.000602308	0.022238	0.398706
ENST00000576345	1.83624	8.94286	7.16392	0.000604313	0.022238	0.395383
uc003xdr.1	-2.08386	5.23195	-7.16044	0.000605766	0.022238	0.392982
chr11:39334375-39350600-	1.50065	8.05409	7.15768	0.000606921	0.022238	0.391077
ENST00000518024	1.43246	8.21151	7.15171	0.000609424	0.022238	0.386962
BF990071R	-1.56127	5.88353	-7.15147	0.000609525	0.022238	0.386796
uc003tqe.4	1.43417	5.70332	7.14521	0.000612163	0.022238	0.382477
ENST00000565008	1.47856	6.39861	7.14313	0.000613045	0.022238	0.381037
ENST00000366405	1.59785	6.55013	7.13638	0.000615913	0.022238	0.376368
ENST00000429257	-1.61381	6.67464	-7.1319	0.000617821	0.022238	0.373273
ENST00000515150	-1.85264	5.36497	-7.12909	0.000619022	0.022238	0.371329
ENST00000456932	-1.73709	7.61815	-7.12907	0.000619034	0.022238	0.371309
TCONS_00024635	1.58306	4.66943	7.12218	0.000621993	0.022238	0.366536
uc003hxh.1	1.63122	5.31489	7.11727	0.000624112	0.022238	0.363131
ENST00000443988	-1.4645	6.98323	-7.10818	0.000628057	0.022238	0.356821
TCONS_00011749	1.79284	9.85742	7.09799	0.000632512	0.022238	0.349742
TCONS_00026380	1.54416	7.53163	7.09286	0.000634768	0.022238	0.346174
ENST00000579599	1.95304	6.11901	7.08677	0.000637462	0.022238	0.341931
TCONS_00007603	-1.90725	5.71806	-7.0849	0.000638292	0.022238	0.340626
ENST00000440208	1.71505	5.23264	7.07899	0.00064092	0.022238	0.336508
NR_036537	2.19904	7.98868	7.07799	0.000641367	0.022238	0.335809
ENST00000565623	-1.72403	8.11939	-7.07141	0.000644316	0.022238	0.33121
ENST00000551972	1.88967	6.54142	7.06968	0.000645089	0.022238	0.330008
TCONS_00024339	1.51358	6.92133	7.06596	0.000646766	0.022238	0.327403
ENST00000388970	1.47967	7.36205	7.06479	0.000647291	0.022238	0.326591
ENST00000541293	1.48283	5.62763	7.06468	0.000647341	0.022238	0.326513
ENST00000463642	1.85913	6.32469	7.05986	0.000649519	0.022238	0.323143
TCONS_00006076	-1.56309	6.40731	-7.05849	0.000650144	0.022238	0.322179
ENST00000552378	1.53629	6.8047	7.05842	0.000650172	0.022238	0.322135
TCONS_00022690	-1.98057	5.71298	-7.05391	0.000652225	0.022238	0.318973
ENST00000544004	1.54083	7.99819	7.05372	0.000652308	0.022238	0.318844
ENST00000546324	-1.82977	8.03344	-7.05131	0.000653408	0.022238	0.317155
ENST00000420776	1.77395	7.87859	7.04615	0.000655766	0.022238	0.31354
NR_037181	-1.69188	8.22027	-7.04408	0.000656716	0.022238	0.312087
TCONS_00021922	1.45205	5.60894	7.04371	0.000656888	0.022238	0.311824
ENST00000419223	-1.49708	8.40446	-7.04349	0.000656988	0.022238	0.311672
uc002fxw.1	1.58924	8.63193	7.04299	0.000657219	0.022238	0.311319
ENST00000581922	1.51342	11.9611	7.04236	0.000657505	0.022238	0.310882
TCONS_00017435	-1.40882	5.69307	-7.03723	0.000659867	0.022238	0.307282
NR_046107	-1.53686	5.66731	-7.03545	0.00066069	0.022238	0.306031
uc003szj.3	1.56612	5.54157	7.02744	0.000664405	0.022238	0.300402
TCONS_00029612	1.49105	7.16503	7.02682	0.000664693	0.022238	0.299966
TCONS_00006565	-1.79697	8.88153	-7.01694	0.000669311	0.022238	0.293013
ENST00000560453	-1.84541	5.12325	-7.01693	0.000669318	0.022238	0.293003
ENST00000561599	1.73095	9.48202	7.01618	0.00066967	0.022238	0.292475
uc011liu.1	1.52239	8.60803	7.01513	0.000670163	0.022238	0.291735
ENST00000578084	-1.58133	7.30569	-7.01393	0.000670726	0.022238	0.290892
DB339348	-1.54327	7.74379	-7.01143	0.000671904	0.022238	0.289129
ENST00000568471	1.42703	7.20417	7.01093	0.000672139	0.022238	0.288778
ENST00000538416	1.4456	4.96752	7.00814	0.000673453	0.022238	0.286815
ENST00000412518	1.46232	7.27351	7.00462	0.00067512	0.022238	0.284331
AK025194	-1.54392	5.87607	-7.00154	0.000676582	0.022238	0.282157
TCONS_00029004	1.48678	6.79843	6.99456	0.00067991	0.022238	0.277225
ENST00000432121	-1.50293	9.66804	-6.99326	0.000680533	0.022238	0.276306
ENST00000518416	1.79539	7.2763	6.98858	0.000682775	0.022238	0.272999
TCONS_00026839	1.41995	7.40161	6.98649	0.00068378	0.022238	0.271519
TCONS_00018527	1.52641	6.06178	6.97973	0.000687042	0.022238	0.266734
ENST00000507869	1.59793	7.96538	6.97953	0.000687139	0.022238	0.266593
NR_046113	1.42151	6.48907	6.97647	0.000688619	0.022238	0.264428
ENST00000423706	-1.4954	6.37783	-6.97261	0.000690495	0.022238	0.261692
ENST00000508763	1.59863	6.15908	6.97139	0.000691088	0.022238	0.260828
uc010vyc.2	1.49196	6.69487	6.96475	0.000694333	0.022238	0.256115
chr13:24548975-24561125+	-1.7275	8.02663	-6.96456	0.000694425	0.022238	0.255982
TCONS_00028204	1.52536	6.77736	6.9605	0.000696415	0.022238	0.253103
TCONS_00025299	-1.41323	7.69039	-6.95965	0.000696836	0.022238	0.252494
uc004bxv.3	-1.40866	8.7056	-6.95714	0.000698072	0.022238	0.250711
ENST00000438131	1.39094	7.66697	6.94821	0.000702488	0.022238	0.244364
TCONS_00023844	1.51617	7.92273	6.94777	0.000702706	0.022238	0.244051
ENST00000446562	1.39538	8.1658	6.94368	0.00070474	0.022238	0.241141
uc003wnt.1	-1.57079	4.91732	-6.94286	0.00070515	0.022238	0.240556
TCONS_00013179	-1.45591	5.69498	-6.94225	0.000705456	0.022238	0.240119
ENST00000441331	-1.62812	5.85819	-6.93976	0.000706697	0.022238	0.238349
ENST00000422430	-1.4621	6.21038	-6.93735	0.000707907	0.022238	0.236627
HMlincRNA1607-	-1.58194	7.75537	-6.93272	0.000710231	0.022238	0.233326
NR_026664	-1.65996	4.83987	-6.92971	0.000711742	0.022238	0.231185
ENST00000450520	1.39467	7.41479	6.92937	0.000711918	0.022238	0.230937
ENST00000389816	-1.65085	7.86409	-6.92721	0.000713007	0.022238	0.229396
HMlincRNA970-	-1.59047	8.08497	-6.92659	0.000713318	0.022238	0.228957
ENST00000494887	1.39313	11.65	6.92566	0.000713789	0.022238	0.228292
ENST00000571085	-1.46264	6.79584	-6.92516	0.000714042	0.022238	0.227936
ENST00000447600	-1.60903	9.97781	-6.92254	0.000715372	0.022238	0.22606
ENST00000482005	1.4528	7.75945	6.92091	0.000716196	0.022238	0.2249
TCONS_00010791	-1.4789	8.29169	-6.91795	0.0007177	0.022238	0.222786
TCONS_00017601	1.63217	8.48748	6.91628	0.000718554	0.022238	0.221589
ENST00000515563	1.3941	7.02245	6.91397	0.000719731	0.022238	0.21994
uc021thc.1	1.40772	7.96261	6.91394	0.000719747	0.022238	0.219917
BU753580	1.68732	4.91218	6.912	0.000720739	0.022238	0.218529
TCONS_00006527	-1.70149	8.89667	-6.90667	0.000723474	0.022238	0.214712
ENST00000518865	1.4126	6.20351	6.90292	0.000725403	0.022238	0.212028
ENST00000465856	-1.44428	7.29646	-6.90226	0.00072574	0.022238	0.211558
ENST00000506465	-1.86756	9.46973	-6.90011	0.000726852	0.022238	0.210015
ENST00000564335	1.92803	6.20671	6.89995	0.000726936	0.022238	0.209898
ENST00000554382	1.68666	7.86124	6.89807	0.000727907	0.022238	0.208554
ENST00000520590	-1.51759	8.25777	-6.8966	0.000728667	0.022238	0.207501
TCONS_00014789	-1.57334	7.75934	-6.8957	0.000729137	0.022238	0.20685
TCONS_00008665	1.44436	8.28771	6.895	0.000729501	0.022238	0.206347
TCONS_00008978	1.46256	6.41383	6.89496	0.000729519	0.022238	0.206322
ENST00000569456	-1.50082	5.09954	-6.89224	0.000730931	0.022238	0.204373
ENST00000422882	1.48564	6.38692	6.89132	0.000731413	0.022238	0.203708
TCONS_00014180	1.4252	11.5784	6.89071	0.000731728	0.022238	0.203273
TCONS_00028717	-1.51832	9.93758	-6.88986	0.000732174	0.022238	0.202659
TCONS_00027180	1.51505	9.85812	6.88879	0.000732729	0.022238	0.201895
ENST00000566701	-1.46385	8.12385	-6.8884	0.000732933	0.022238	0.201613
ENST00000434733	-1.74845	7.90612	-6.88663	0.000733858	0.022238	0.200342
uc002kle.1	-1.52	5.63208	-6.88652	0.000733913	0.022238	0.200266
NR_026837	1.56298	7.48435	6.88557	0.000734409	0.022238	0.199585
ENST00000552784	1.3931	7.64063	6.88051	0.000737063	0.022238	0.195946
ENST00000568833	1.56322	9.20865	6.87943	0.000737631	0.022238	0.195169
ENST00000501725	-1.60359	8.67258	-6.87907	0.000737822	0.022238	0.194908
ENST00000528553	-1.42437	6.55708	-6.87493	0.000739998	0.022238	0.191936
ENST00000453525	-1.46451	8.09861	-6.87461	0.000740168	0.022238	0.191705
ENST00000429482	-1.79568	8.06585	-6.86894	0.000743168	0.022238	0.187623
NR_046843	-1.57931	5.23674	-6.86782	0.000743761	0.022238	0.186818
ENST00000417522	-1.58096	4.85078	-6.86741	0.00074398	0.022238	0.186521
ENST00000457958	1.41641	6.47716	6.86712	0.000744133	0.022238	0.186313
TCONS_00013320	1.37702	9.72625	6.86432	0.000745622	0.022238	0.184295
TCONS_00016481	-1.51289	8.40157	-6.85864	0.000748652	0.022238	0.180201
NR_024424	-1.44244	6.35403	-6.85423	0.000751017	0.022238	0.177018
ENST00000354927	-1.50068	7.50959	-6.85233	0.000752035	0.022238	0.175649
ENST00000411433	1.48897	7.04639	6.84904	0.000753807	0.022238	0.173273
ENST00000414345	-1.43664	9.94423	-6.84851	0.000754096	0.022238	0.172885
TCONS_00000796	1.3924	7.80842	6.84733	0.000754732	0.022238	0.172035
ENST00000523703	1.39167	8.59398	6.84595	0.00075548	0.022238	0.171034
ENST00000563182	1.52392	6.11514	6.8426	0.00075729	0.022238	0.168617
uc009wxq.2	-2.05602	13.3665	-6.83306	0.000762482	0.022238	0.161716
TCONS_00021726	-1.5368	8.16371	-6.83197	0.000763079	0.022238	0.160925
TCONS_00001776	-1.52761	6.58018	-6.8307	0.000763773	0.022238	0.160007
ENST00000575917	-1.40435	6.64212	-6.83	0.000764159	0.022238	0.159496
TCONS_00012018	1.61128	11.3133	6.82717	0.000765707	0.022238	0.157451
ENST00000420255	1.36759	7.13948	6.82483	0.000766995	0.022238	0.155753
TCONS_00016890	-1.74109	8.32877	-6.82314	0.000767924	0.022238	0.154529
ENST00000504628	1.38904	9.6727	6.82221	0.000768436	0.022238	0.153855
ENST00000478239	-1.55136	5.31991	-6.81777	0.000770894	0.022238	0.150627
NR_046159	-1.39854	7.33511	-6.81664	0.00077152	0.022238	0.149807
ENST00000498233	-1.46661	6.87256	-6.81557	0.000772108	0.022238	0.149037
ENST00000452436	1.381	10.0982	6.81484	0.000772517	0.022238	0.148502
ENST00000513758	1.39155	8.45766	6.81374	0.000773124	0.022238	0.147708
NR_038457	-1.56849	7.04689	-6.80971	0.000775366	0.022238	0.144779
chr13:104871700-104904225-	-1.61385	6.59396	-6.80957	0.000775447	0.022238	0.144675
NR_027928	-2.05087	6.8892	-6.80688	0.000776947	0.022238	0.142721
TCONS_00021761	1.57358	8.68821	6.80615	0.000777351	0.022238	0.142194
DB345127	-1.47518	6.01603	-6.80605	0.00077741	0.022238	0.142117
HMlincRNA1572+	1.45498	5.60877	6.80513	0.000777923	0.022238	0.141451
ENST00000574080	1.48828	5.05797	6.80426	0.000778411	0.022238	0.140816
uc002ilo.1	-1.71095	7.65974	-6.80048	0.000780529	0.022238	0.138069
ENST00000567054	2.01176	11.3019	6.80042	0.000780567	0.022238	0.13802
ENST00000549718	-1.53373	5.12277	-6.79945	0.000781106	0.022238	0.137321
uc.453-	1.38021	5.73677	6.79747	0.000782225	0.022238	0.135873
ENST00000539009	1.4427	6.45161	6.7912	0.000785763	0.022238	0.131308
ENST00000536131	-1.39926	7.10924	-6.78734	0.00078795	0.022238	0.128496
uc021thj.1	1.44447	8.10716	6.78733	0.000787957	0.022238	0.128488
ENST00000423083	1.39264	7.15231	6.78668	0.000788322	0.022238	0.128019
uc010ghu.1	1.40855	5.10563	6.78641	0.000788481	0.022238	0.127815
ENST00000571606	-1.40598	8.92607	-6.78259	0.000790654	0.022238	0.12503
TCONS_00021991	-1.44697	6.43432	-6.78248	0.000790713	0.022238	0.124955
ENST00000473001	1.46249	6.47903	6.7793	0.000792529	0.022238	0.122634
NR_027889	1.45725	7.76971	6.77485	0.000795078	0.022238	0.119383
ENST00000526186	-1.37966	6.90545	-6.77364	0.000795773	0.022238	0.118498
uc010ury.2	-1.63184	5.23503	-6.77152	0.00079699	0.022238	0.116952
ENST00000450187	-1.37599	6.91136	-6.77129	0.000797126	0.022238	0.116779
ENST00000447148	-1.52342	6.86802	-6.77105	0.000797264	0.022238	0.116604
ENST00000430816	-1.49594	5.51281	-6.77038	0.000797651	0.022238	0.116113
NR_046432	-1.35737	6.71232	-6.76914	0.000798362	0.022238	0.115211
ENST00000427974	1.45733	5.65425	6.76777	0.000799155	0.022238	0.114206
TCONS_00003658	1.42011	6.75204	6.76585	0.000800261	0.022238	0.112806
ENST00000433337	1.52605	5.04458	6.76448	0.000801057	0.022238	0.111799
ENST00000566944	-1.35295	7.30078	-6.76165	0.000802695	0.022238	0.10973
TCONS_00020532	1.54335	7.32601	6.76136	0.000802863	0.022238	0.109518
BI752281	-1.36136	6.15484	-6.7601	0.000803596	0.022238	0.108595
ENST00000445398	-1.60466	5.91952	-6.75997	0.000803668	0.022238	0.108504
ENST00000550568	-2.06446	7.31451	-6.75856	0.000804493	0.022238	0.107465
ENST00000425653	-1.59196	7.1329	-6.75617	0.000805884	0.022238	0.105716
ENST00000539328	1.62729	5.99098	6.75448	0.000806868	0.022238	0.104479
DA096519	1.3913	6.89753	6.75353	0.000807423	0.022238	0.103784
ENST00000566747	1.37742	8.97472	6.74989	0.000809551	0.022238	0.101117
ENST00000457033	1.43928	6.75817	6.7492	0.000809955	0.022238	0.100612
ENST00000548903	1.38035	6.91092	6.74812	0.000810588	0.022238	0.0998211
TCONS_00010008	-1.37629	7.2739	-6.74625	0.00081169	0.022238	0.098445
chr3:72052025-72073225-	1.46933	6.46336	6.74353	0.000813289	0.022238	0.0964501
TCONS_00024645	-1.37218	7.16248	-6.74255	0.000813865	0.022238	0.095733
ENST00000563004	-1.37976	5.42002	-6.73967	0.000815569	0.022238	0.0936137
ENST00000446592	1.38265	6.88471	6.73928	0.000815797	0.022238	0.0933311
TCONS_00016158	1.45433	7.09593	6.73766	0.000816756	0.022238	0.0921404
ENST00000504578	1.41998	8.73339	6.73288	0.000819594	0.022238	0.088625
ENST00000577173	-1.90962	5.24509	-6.73253	0.000819802	0.022238	0.0883679
uc003xnc.3	1.44896	6.29402	6.72801	0.000822492	0.022238	0.0850478
ENST00000496247	1.57437	6.21278	6.7268	0.000823217	0.022238	0.084155
uc010mss.1	-1.68738	5.66048	-6.72588	0.000823769	0.022238	0.0834754
ENST00000556130	1.70516	7.61491	6.72362	0.000825121	0.022238	0.0818136
uc002aqi.3	-1.48847	4.6079	-6.72221	0.000825962	0.022238	0.0807799
TCONS_00012771	-1.80678	6.56599	-6.72149	0.000826396	0.022238	0.0802472
TCONS_00002039	-1.48964	8.56716	-6.71618	0.000829593	0.022238	0.0763331
uc010qbg.1	1.4539	5.83367	6.71322	0.00083138	0.022238	0.0741516
ENST00000522856	-1.54273	5.33142	-6.71224	0.000831972	0.022238	0.0734293
TCONS_00004370	-1.41144	8.6029	-6.71027	0.000833164	0.022238	0.0719776
ENST00000451285	1.37234	8.78115	6.71004	0.000833301	0.022238	0.071811
uc010bki.1	1.35066	7.24216	6.709	0.000833931	0.022238	0.0710437
ENST00000417409	1.51235	8.51143	6.70826	0.000834383	0.022238	0.0704942
ENST00000465283	-1.74714	8.08254	-6.70819	0.000834423	0.022238	0.0704455
ENST00000457116	1.38224	7.22763	6.70164	0.000838411	0.022238	0.0656095
TCONS_00026365	1.66744	7.61781	6.70064	0.000839023	0.022238	0.0648699
ENST00000430530	1.4544	7.49962	6.70054	0.000839087	0.022238	0.0647916
ENST00000434292	1.43314	6.19163	6.70019	0.000839297	0.022238	0.0645383
TCONS_00013288	1.36379	5.89915	6.70001	0.00083941	0.022238	0.0644019
ENST00000430123	-1.58198	6.43573	-6.6994	0.000839781	0.022238	0.0639536
ENST00000543308	-1.43835	7.08728	-6.69351	0.000843393	0.022238	0.0595985
ENST00000565310	1.53523	7.99999	6.69285	0.000843799	0.022238	0.0591107
ENST00000556073	1.42224	6.68539	6.68947	0.00084588	0.022238	0.0566111
ENST00000569596	1.35692	6.95705	6.68914	0.000846087	0.022238	0.056363
uc002sbr.3	1.38711	6.03135	6.68653	0.000847696	0.022238	0.054434
uc003pji.3	-1.74083	7.55327	-6.68357	0.00084953	0.022238	0.0522415
ENST00000430306	1.62447	7.5582	6.68237	0.000850274	0.022238	0.0513521
NR_027085	1.48427	5.89139	6.68167	0.000850708	0.022238	0.0508348
ENST00000395675	-1.4217	6.88145	-6.67743	0.000853344	0.022238	0.0476935
ENST00000457327	-1.71192	5.16811	-6.67584	0.000854334	0.022238	0.0465169
ENST00000512966	-1.62084	7.70187	-6.67497	0.000854882	0.022238	0.0458665
TCONS_00028720	-1.50234	6.43343	-6.6743	0.000855296	0.022238	0.045375
ENST00000536296	-2.17639	6.39577	-6.67345	0.000855832	0.022238	0.0447385
TCONS_00022170	-1.51501	4.80427	-6.67275	0.000856268	0.022238	0.0442213
ENST00000575148	1.4929	6.54433	6.6707	0.000857548	0.022238	0.0427043
ENST00000419784	1.43913	7.16392	6.67066	0.000857574	0.022238	0.0426736
ENST00000403651	1.33951	8.80878	6.66715	0.000859781	0.022238	0.0400644
ENST00000548955	-1.68497	7.44811	-6.66593	0.00086055	0.022238	0.0391562
ENST00000455071	-1.64919	7.48126	-6.66528	0.000860959	0.022238	0.0386735
ENST00000568496	1.65643	6.0214	6.66462	0.000861372	0.022238	0.0381861
HMlincRNA136-	-1.43988	5.5539	-6.66403	0.000861746	0.022238	0.0377455
TCONS_00003930	1.53606	6.81007	6.66268	0.000862594	0.022238	0.0367468
TCONS_00015370	1.40079	8.58831	6.66221	0.000862891	0.022238	0.0363974
ENST00000418803	-1.38534	7.73178	-6.66121	0.000863521	0.022238	0.0356553
ENST00000505870	-1.47765	5.23326	-6.65994	0.000864329	0.022238	0.0347064
ENST00000425350	1.35764	5.59155	6.65848	0.000865253	0.022238	0.0336207
ENST00000503557	1.3599	7.08003	6.65616	0.000866722	0.022238	0.0318981
TCONS_00014758	1.47948	11.5376	6.65613	0.000866738	0.022238	0.0318783
ENST00000513895	1.33356	5.86893	6.65457	0.000867729	0.022238	0.0307176
ENST00000415451	1.42976	8.30245	6.65405	0.000868059	0.022238	0.0303318
ENST00000428781	-1.80928	11.3328	-6.65384	0.000868193	0.022238	0.0301753
TCONS_00019359	1.46741	9.38831	6.65338	0.00086849	0.022238	0.0298277
ENST00000471614	1.70722	7.55275	6.65243	0.00086909	0.022238	0.029126
ENST00000526566	-1.36995	6.79832	-6.64791	0.000871972	0.022238	0.025762
TCONS_00014884	1.34042	7.13998	6.64474	0.000874006	0.022238	0.023395
ENST00000526556	1.43168	8.84982	6.64275	0.000875283	0.022238	0.021911
ENST00000583436	1.34056	5.66599	6.64151	0.000876073	0.022238	0.0209939
ENST00000431237	1.41713	6.7771	6.63915	0.000877597	0.022238	0.0192281
ENST00000438639	1.38247	5.69408	6.63708	0.000878929	0.022238	0.0176868
NR_047511	-1.56757	5.87612	-6.63126	0.000882694	0.022238	0.013342
ENST00000533179	1.38	6.5316	6.62862	0.000884403	0.022238	0.011375
ENST00000442150	1.3444	9.03744	6.62501	0.000886758	0.022238	0.00867184
TCONS_00029931	1.42175	6.92849	6.62453	0.000887065	0.022238	0.00831894
uc009ycs.2	-1.34945	7.10932	-6.62382	0.000887531	0.022238	0.00778498
ENST00000570167	-1.89989	8.32197	-6.6229	0.000888131	0.022238	0.00709795
TCONS_00028465	1.34594	7.03899	6.62253	0.000888371	0.022238	0.0068233
ENST00000453420	-1.90992	6.42611	-6.62142	0.000889096	0.022238	0.00599392
ENST00000514736	1.39383	6.35144	6.62109	0.000889315	0.022238	0.00574373
ENST00000428201	-1.8993	5.68736	-6.61932	0.000890469	0.022238	0.00442496
ENST00000559730	1.41712	6.09507	6.61728	0.000891806	0.022238	0.0028987
TCONS_00012633	1.43316	8.19824	6.6162	0.000892518	0.022238	0.00208759
NR_034107	1.49273	7.30787	6.61243	0.000895	0.022238	-0.000737446
NR_037927	-1.38533	9.03184	-6.61144	0.000895649	0.022238	-0.00147443
NR_047658	-1.43677	8.49111	-6.6113	0.000895744	0.022238	-0.001582
TCONS_00029178	1.45006	6.62517	6.61119	0.000895816	0.022238	-0.00166422
ENST00000440001	-1.48855	7.60613	-6.61061	0.000896196	0.022238	-0.00209528
uc021xja.1	-1.38358	6.64857	-6.60647	0.000898933	0.022238	-0.00519782
TCONS_00005994	-1.33398	7.68137	-6.60619	0.000899117	0.022238	-0.005406
ENST00000417112	-1.68304	8.74192	-6.60408	0.000900516	0.022238	-0.00698706
ENST00000430772	1.37589	9.43244	6.60263	0.000901483	0.022238	-0.00807921
ENST00000434661	1.4547	7.21708	6.60097	0.000902583	0.022238	-0.00931986
ENST00000442435	-1.35584	7.52792	-6.60032	0.000903019	0.022238	-0.00981114
NR_003530	-1.46391	5.78686	-6.59801	0.000904557	0.022238	-0.0115434
ENST00000457024	-1.43957	6.41707	-6.59159	0.000908852	0.022238	-0.0163639
ENST00000437825	-1.32229	7.27544	-6.5901	0.000909849	0.022238	-0.0174797
uc009voh.3	-1.72078	6.30874	-6.58993	0.000909965	0.022238	-0.0176096
ENST00000507983	1.42023	9.41124	6.58976	0.000910083	0.022238	-0.0177418
uc003wpf.1	-1.38601	4.66525	-6.58934	0.000910362	0.022238	-0.018054
ENST00000521016	1.42719	8.08136	6.5871	0.000911867	0.022238	-0.0197347
ENST00000537961	-1.40484	7.4078	-6.58698	0.000911949	0.022238	-0.0198261
TCONS_00012739	1.43304	6.00099	6.58542	0.000913004	0.022238	-0.0210036
ENST00000510198	-1.57126	8.0552	-6.5852	0.000913147	0.022238	-0.0211626
ENST00000444887	1.44234	7.13693	6.58097	0.000916007	0.022238	-0.0243468
NR_024012	-1.51448	8.90994	-6.57882	0.000917466	0.022238	-0.0259666
AA808940	-1.59102	8.73417	-6.57707	0.000918648	0.022238	-0.0272781
ENST00000571890	-1.31829	4.7655	-6.57495	0.000920095	0.022238	-0.0288798
uc001oqx.1	1.40177	6.32031	6.57322	0.000921267	0.022238	-0.030177
ENST00000556212	1.37745	6.00302	6.57285	0.000921523	0.022238	-0.0304598
TCONS_00006576	-1.54889	5.60035	-6.57197	0.000922121	0.022238	-0.0311198
ENST00000452283	1.36275	8.01035	6.5718	0.000922239	0.022238	-0.0312501
ENST00000423473	1.43316	7.81837	6.56954	0.000923785	0.022238	-0.0329559
ENST00000433329	1.42873	5.40034	6.56942	0.000923861	0.022238	-0.0330403
ENST00000438551	1.43745	5.10441	6.56755	0.000925141	0.022238	-0.0344497
ENST00000576468	-1.38939	8.03741	-6.56573	0.000926392	0.022238	-0.0358262
ENST00000555435	1.46769	6.06371	6.56516	0.000926781	0.022238	-0.0362537
ENST00000527092	1.38065	8.41462	6.56283	0.000928382	0.022238	-0.0380127
BG619841	1.34071	8.30254	6.56194	0.000928992	0.022238	-0.0386816
ENST00000431637	1.34402	7.0817	6.56108	0.000929589	0.022238	-0.0393362
ENST00000453998	1.57219	7.3295	6.56054	0.00092996	0.022238	-0.0397419
TCONS_00006340	-1.46162	7.09117	-6.55867	0.000931246	0.022238	-0.04115
ENST00000527283	1.49239	6.56825	6.55839	0.000931439	0.022238	-0.0413609
ENST00000525580	1.36348	7.86682	6.55728	0.000932208	0.022238	-0.0422017
ENST00000458036	1.36168	7.70541	6.55727	0.000932216	0.022238	-0.0422112
ENST00000436432	1.36326	6.67526	6.55723	0.000932242	0.022238	-0.0422388
chr6:91443800-91462575+	1.37525	6.26314	6.55658	0.000932694	0.022238	-0.0427329
ENST00000555797	1.33567	5.22156	6.55545	0.000933475	0.022238	-0.0435857
ENST00000438113	-1.37872	7.48535	-6.55382	0.000934603	0.022238	-0.0448167
ENST00000456795	1.59312	8.31166	6.54736	0.000939093	0.022238	-0.0497
TCONS_00006549	1.35043	6.59012	6.54513	0.000940644	0.022238	-0.0513819
NR_033877	-1.35775	6.40243	-6.54505	0.0009407	0.022238	-0.0514424
TCONS_00003662	-1.57433	9.10457	-6.5448	0.000940874	0.022238	-0.0516306
TCONS_00012631	1.33204	7.08106	6.54408	0.00094138	0.022238	-0.0521788
NR_046008	-1.68815	5.34586	-6.54385	0.000941538	0.022238	-0.0523499
TCONS_00013775	-2.00643	6.47219	-6.54296	0.000942161	0.022238	-0.0530241
TCONS_00026291	-1.39125	8.59059	-6.54177	0.000942996	0.022238	-0.0539273
ENST00000509783	1.31161	6.12058	6.54052	0.000943869	0.022238	-0.0548707
TCONS_00022475	1.49036	5.43671	6.53698	0.000946354	0.022238	-0.0575505
ENST00000530072	-1.63202	7.39516	-6.53259	0.000949447	0.022238	-0.0608775
ENST00000438432	-1.56047	6.35593	-6.52867	0.000952221	0.022238	-0.063852
ENST00000436304	1.37856	8.66032	6.52671	0.000953609	0.022238	-0.0653369
ENST00000523664	-1.43385	6.87944	-6.52517	0.000954701	0.022238	-0.0665039
uc010dbn.1	-1.69051	4.88135	-6.52398	0.000955546	0.022238	-0.0674065
TCONS_00025565	1.54885	10.3697	6.52391	0.0009556	0.022238	-0.0674641
NR_038250	1.39735	6.46236	6.52285	0.000956351	0.022238	-0.0682652
TCONS_00017457	1.33675	5.6335	6.52215	0.000956852	0.022238	-0.0687995
ENST00000451419	1.70864	5.24477	6.52209	0.000956896	0.022238	-0.0688459
ENST00000412375	-1.47493	8.941	-6.52202	0.000956943	0.022238	-0.068896
TCONS_00025268	1.31498	6.78822	6.5189	0.000959169	0.022238	-0.0712658
ENST00000458396	1.80696	7.58081	6.51658	0.000960829	0.022238	-0.0730302
ENST00000559030	-1.92332	7.87557	-6.51607	0.000961191	0.022238	-0.073414
ENST00000440556	1.39255	5.39566	6.5129	0.000963469	0.022238	-0.075829
TCONS_00018119	-2.11991	5.47301	-6.51042	0.00096525	0.022238	-0.0777124
HMlincRNA1534+	-1.48131	5.12797	-6.50703	0.000967695	0.022238	-0.0802941
ENST00000566144	-1.63878	5.78865	-6.50437	0.00096961	0.022238	-0.0823112
ENST00000424252	1.32577	6.99982	6.50383	0.000970005	0.022238	-0.0827262
uc003emb.3	1.79986	8.25019	6.50201	0.000971322	0.022238	-0.0841116
ENST00000426213	-1.39291	7.76471	-6.50067	0.000972295	0.022238	-0.0851329
ENST00000467342	-1.44352	5.9718	-6.50065	0.000972306	0.022238	-0.0851444
NR_001524	-1.63334	8.13859	-6.49583	0.000975813	0.022238	-0.0888192
ENST00000536141	1.41425	6.02036	6.4958	0.000975833	0.022238	-0.0888398
NR_033701	-1.42447	6.17922	-6.49578	0.00097585	0.022238	-0.0888574
ENST00000513809	-1.30771	5.7563	-6.49411	0.000977067	0.022238	-0.0901294
TCONS_00027115	1.59281	6.782	6.49331	0.000977653	0.022238	-0.0907421
ENST00000444379	1.36289	10.7987	6.49096	0.000979372	0.022238	-0.0925349
TCONS_00010540	-1.86225	5.28185	-6.48382	0.000984609	0.022238	-0.0979793
ENST00000562582	1.63262	6.32857	6.48309	0.000985146	0.022238	-0.0985363
ENST00000556520	-1.35849	4.96926	-6.48295	0.000985256	0.022238	-0.0986502
TCONS_00017379	1.36468	4.98391	6.48104	0.00098666	0.022238	-0.100104
ENST00000575506	-1.31374	6.02263	-6.48041	0.000987127	0.022238	-0.100587
HMlincRNA815-	1.47035	6.75498	6.47912	0.00098808	0.022238	-0.101573
ENST00000420642	-1.5431	6.5854	-6.47849	0.000988549	0.022238	-0.102057
ENST00000544329	-1.43829	8.59811	-6.47664	0.000989917	0.022238	-0.103469
ENST00000422151	1.30608	7.00832	6.47284	0.000992734	0.022238	-0.106372
TCONS_00027473	-1.55267	8.79454	-6.47132	0.000993869	0.022238	-0.107539
ENST00000543925	1.4258	6.2376	6.46268	0.00100032	0.022238	-0.114153
ENST00000480805	-1.48055	8.60529	-6.45999	0.00100234	0.022238	-0.116212
uc003lta.2	-1.5185	5.65721	-6.45994	0.00100238	0.022238	-0.116247
NR_004858	-1.86831	6.00263	-6.45713	0.0010045	0.022238	-0.118403
ENST00000522882	1.4015	6.25204	6.4557	0.00100557	0.022238	-0.119501
ENST00000537346	1.5144	6.35956	6.4552	0.00100595	0.022238	-0.119885
ENST00000466856	-1.41229	7.50091	-6.45255	0.00100796	0.022238	-0.121921
TCONS_00011106	1.31381	9.53469	6.45042	0.00100957	0.022238	-0.123554
ENST00000440750	-1.42406	7.78482	-6.44994	0.00100993	0.022238	-0.123918
NR_026954	-1.38363	9.48121	-6.44886	0.00101075	0.022238	-0.124746
ENST00000413339	1.41415	7.02634	6.44794	0.00101146	0.022238	-0.12546
ENST00000581657	-1.40007	6.11217	-6.44752	0.00101177	0.022238	-0.125778
uc002xzq.1	-1.53866	8.76596	-6.44687	0.00101227	0.022238	-0.126279
chrX:36682025-36716325+	1.34873	6.37015	6.44533	0.00101344	0.022238	-0.127462
chr14:84031800-84050525+	1.37792	8.63897	6.44523	0.00101352	0.022238	-0.127539
ENST00000566190	1.30784	6.72321	6.44053	0.0010171	0.022238	-0.131146
ENST00000506875	1.33299	10.8895	6.43939	0.00101797	0.022238	-0.132025
NR_039997	1.40479	7.7292	6.43877	0.00101844	0.022238	-0.132499
TCONS_00004501	1.33266	5.92807	6.43857	0.0010186	0.022238	-0.132652
uc003vcq.1	1.32752	10.1965	6.4362	0.00102042	0.022238	-0.134481
uc001ogq.1	-1.3977	9.88003	-6.43517	0.00102121	0.022238	-0.13527
ENST00000506172	1.54853	5.20479	6.43398	0.00102213	0.022238	-0.136189
ENST00000565305	1.4315	8.19795	6.43374	0.00102231	0.022238	-0.136369
TCONS_00028667	1.36523	7.59769	6.43046	0.00102484	0.022238	-0.138896
TCONS_00002599	-1.53121	8.78714	-6.42904	0.00102593	0.022238	-0.139985
ENST00000557839	1.32413	7.04557	6.42802	0.00102672	0.022238	-0.140777
TCONS_00021137	1.58403	5.09686	6.42353	0.0010302	0.022238	-0.144233
TCONS_00026641	1.33141	5.88998	6.42328	0.0010304	0.022238	-0.144429
uc002mil.2	1.29361	7.25584	6.42317	0.00103048	0.022238	-0.144511
TCONS_00029046	1.38871	7.14023	6.42189	0.00103147	0.022238	-0.145498
ENST00000504249	1.31878	6.31419	6.42106	0.00103212	0.022238	-0.14614
TCONS_00010087	1.42299	5.38724	6.42052	0.00103254	0.022238	-0.146553
ENST00000421943	1.63744	8.48223	6.4188	0.00103388	0.022238	-0.147883
ENST00000451350	-1.65916	6.93501	-6.41833	0.00103425	0.022238	-0.148245
TCONS_00009177	1.39628	6.1612	6.41832	0.00103425	0.022238	-0.148249
TCONS_00026722	-1.87267	7.02878	-6.41741	0.00103496	0.022238	-0.148954
ENST00000525337	1.47437	8.55762	6.41431	0.00103739	0.022238	-0.151347
uc001pqd.3	-2.46763	6.38933	-6.41411	0.00103755	0.022238	-0.151503
ENST00000511596	1.32498	4.68169	6.41313	0.00103831	0.022238	-0.152253
TCONS_00016047	-2.00557	6.11851	-6.41275	0.00103861	0.022238	-0.152547
ENST00000416191	1.31257	6.03731	6.41047	0.0010404	0.022238	-0.154308
uc001hyk.1	1.30025	7.43811	6.41036	0.00104048	0.022238	-0.154393
BX088953	1.36566	8.93938	6.40991	0.00104083	0.022238	-0.15474
ENST00000422931	1.40177	8.39456	6.40813	0.00104223	0.022238	-0.156113
TCONS_00017156	-1.55438	6.65513	-6.40708	0.00104306	0.022238	-0.15693
ENST00000430842	1.42019	8.46104	6.40628	0.0010437	0.022238	-0.157549
U63828	1.87773	6.41953	6.40497	0.00104473	0.022238	-0.158559
ENST00000584023	1.49673	7.15763	6.4047	0.00104494	0.022238	-0.158768
ENST00000425802	-2.32806	5.9244	-6.40463	0.001045	0.022238	-0.158822
NR_029427	-1.66182	6.84042	-6.40429	0.00104527	0.022238	-0.159087
ENST00000433763	1.38638	6.31276	6.40315	0.00104616	0.022238	-0.159967
AI201012	-1.3699	8.91637	-6.40208	0.00104701	0.022238	-0.160793
BF352896R	-1.50022	6.15717	-6.40194	0.00104712	0.022238	-0.160905
ENST00000419406	-1.30504	4.84666	-6.40058	0.0010482	0.022238	-0.161954
ENST00000447478	1.49073	6.80523	6.39888	0.00104954	0.022238	-0.163265
ENST00000568788	1.28333	5.64986	6.39852	0.00104983	0.022238	-0.163546
NR_073016	-1.3438	5.02469	-6.39594	0.00105188	0.022238	-0.165542
TCONS_00021872	1.29733	7.03386	6.39501	0.00105262	0.022238	-0.166266
ENST00000546065	-1.46805	8.79367	-6.39265	0.0010545	0.022238	-0.168093
ENST00000457217	-1.37992	6.93537	-6.38992	0.00105668	0.022238	-0.170202
uc004ajp.3	1.30338	5.33136	6.38989	0.00105671	0.022238	-0.17023
NR_040008	-1.43349	6.6984	-6.38986	0.00105673	0.022238	-0.17025
ENST00000530652	1.32015	6.88254	6.38984	0.00105674	0.022238	-0.170264
ENST00000414207	-1.28271	5.29096	-6.38744	0.00105866	0.022238	-0.172123
ENST00000458348	-1.44952	8.82096	-6.38561	0.00106013	0.022238	-0.173542
ENST00000514598	-1.31266	4.77199	-6.38422	0.00106125	0.022238	-0.174624
ENST00000507565	1.41515	7.48439	6.38395	0.00106146	0.022238	-0.174829
ENST00000542121	1.4149	7.21079	6.38211	0.00106295	0.022238	-0.17626
ENST00000444933	-1.43764	7.95827	-6.3818	0.0010632	0.022238	-0.1765
BF986711R	-1.28067	6.9376	-6.37824	0.00106607	0.0222741	-0.179264
HMlincRNA425-	1.27657	7.65417	6.37469	0.00106894	0.022295	-0.18202
ENST00000572287	1.4117	9.47765	6.37417	0.00106936	0.022295	-0.182423
ENST00000417624	-1.44118	6.66966	-6.36172	0.00107951	0.0223337	-0.192098
ENST00000506379	-1.4114	9.06191	-6.36121	0.00107993	0.0223337	-0.192495
TCONS_00008021	1.40258	5.72217	6.36023	0.00108073	0.0223337	-0.193255
ENST00000449941	1.27111	8.29767	6.35806	0.00108252	0.0223337	-0.194949
uc001aze.3	-2.43672	5.82773	-6.35691	0.00108346	0.0223337	-0.195842
TCONS_00016095	1.53726	5.15008	6.35379	0.00108603	0.0223337	-0.19827
ENST00000501954	1.486	4.93231	6.35327	0.00108647	0.0223337	-0.198677
TCONS_00013916	-1.38685	6.50083	-6.35257	0.00108704	0.0223337	-0.199221
ENST00000549032	-1.43998	7.36799	-6.35238	0.0010872	0.0223337	-0.19937
TCONS_00019503	1.30714	7.90359	6.35193	0.00108757	0.0223337	-0.199719
ENST00000574307	-1.43204	5.22573	-6.35123	0.00108815	0.0223337	-0.200269
ENST00000567376	1.6585	7.25491	6.34992	0.00108924	0.0223337	-0.201288
ENST00000552718	1.43161	4.81197	6.34954	0.00108955	0.0223337	-0.201585
ENST00000433546	1.28282	6.49627	6.34806	0.00109078	0.0223337	-0.202736
ENST00000557749	1.27115	6.42162	6.34535	0.00109303	0.0223337	-0.204855
ENST00000575487	1.48044	5.02047	6.34471	0.00109356	0.0223337	-0.20535
NR_024050	1.39226	5.81237	6.34424	0.00109396	0.0223337	-0.205721
NR_047576	-1.77884	6.576	-6.34152	0.00109622	0.0223337	-0.207838
uc001kps.2	-1.62213	8.66695	-6.33986	0.00109761	0.0223337	-0.209137
uc003jyk.3	1.41497	8.89049	6.33859	0.00109867	0.0223337	-0.210124
uc021wsk.1	1.5103	6.05069	6.33786	0.00109928	0.0223337	-0.210694
ENST00000552364	1.29329	6.37462	6.33562	0.00110116	0.0223337	-0.212444
ENST00000414120	1.38895	9.63673	6.33554	0.00110122	0.0223337	-0.212507
NR_023314	-1.83549	5.55246	-6.33486	0.0011018	0.0223337	-0.213042
ENST00000507244	1.34358	5.0375	6.33357	0.00110288	0.0223337	-0.214051
ENST00000366185	1.61937	5.96378	6.33203	0.00110417	0.0223337	-0.215249
ENST00000434902	1.33928	7.08425	6.33078	0.00110523	0.0223337	-0.216232
TCONS_00025500	-1.35363	8.77494	-6.32889	0.00110682	0.0223337	-0.217706
NR_038288	-1.45597	9.13911	-6.32887	0.00110684	0.0223337	-0.217721
chr18:10217025-10229050-	1.37012	8.74589	6.32887	0.00110684	0.0223337	-0.217722
NR_026675	-1.47137	5.12419	-6.32671	0.00110866	0.0223337	-0.219409
TCONS_00022320	-1.45974	5.80783	-6.3267	0.00110867	0.0223337	-0.219416
TCONS_00014990	1.26987	6.94895	6.32618	0.00110911	0.0223337	-0.219823
uc001vim.3	-1.46879	9.53327	-6.3243	0.0011107	0.0223427	-0.221297
ENST00000436671	-1.41882	5.12334	-6.32026	0.00111414	0.0223457	-0.224464
ENST00000523605	1.30462	6.00662	6.31972	0.00111459	0.0223457	-0.224884
ENST00000549055	-1.27946	6.26305	-6.31955	0.00111474	0.0223457	-0.225017
TCONS_00003563	-1.37723	7.12728	-6.31871	0.00111545	0.0223457	-0.225671
ENST00000428945	-1.32036	7.25144	-6.3172	0.00111674	0.0223486	-0.226858
ENST00000567313	-1.46467	6.45666	-6.3119	0.00112127	0.0224162	-0.231011
TCONS_00004141	1.53476	8.06791	6.3097	0.00112315	0.02242	-0.232732
ENST00000571152	-1.44866	10.0611	-6.30608	0.00112627	0.02242	-0.235577
TCONS_00025723	-1.77604	5.75836	-6.30568	0.00112662	0.02242	-0.23589
ENST00000563397	-1.38082	7.02379	-6.30532	0.00112693	0.02242	-0.236173
AI889529	1.26636	7.06643	6.30497	0.00112722	0.02242	-0.236445
ENST00000566864	1.526	8.62408	6.30361	0.0011284	0.0224205	-0.237515
TCONS_00006903	-1.34614	9.06127	-6.29809	0.00113317	0.0224473	-0.241848
uc021sdy.1	1.50423	7.01584	6.29711	0.00113402	0.0224473	-0.242617
TCONS_00020970	1.36742	6.60798	6.29676	0.00113433	0.0224473	-0.242897
uc002ray.1	1.36057	5.8303	6.29553	0.0011354	0.0224473	-0.24386
TCONS_00023547	-1.42979	6.49629	-6.29329	0.00113734	0.0224473	-0.245619
ENST00000532794	-1.32808	7.01496	-6.29167	0.00113876	0.0224473	-0.2469
ENST00000479299	1.28795	7.06186	6.29035	0.00113991	0.0224473	-0.247935
CN264150	1.59517	6.28984	6.28945	0.0011407	0.0224473	-0.248643
ENST00000457719	-1.67314	8.59466	-6.28909	0.00114101	0.0224473	-0.248923
ENST00000446246	1.55092	4.93457	6.28805	0.00114193	0.0224473	-0.249746
uc021thd.1	-1.47412	8.05273	-6.2871	0.00114276	0.0224473	-0.250495
ENST00000538943	1.2755	7.876	6.28474	0.00114483	0.0224473	-0.25235
ENST00000544535	1.28168	6.92364	6.28414	0.00114535	0.0224473	-0.252821
TCONS_00022641	1.29681	5.8127	6.28351	0.00114591	0.0224473	-0.253319
uc009yiz.3	1.4953	4.73462	6.27821	0.00115058	0.0224887	-0.257495
TCONS_00013565	1.44311	5.43825	6.27598	0.00115255	0.0224887	-0.259256
NR_051994	-1.33517	5.3047	-6.27313	0.00115507	0.0224887	-0.261502
ENST00000414875	1.47001	5.92313	6.27253	0.0011556	0.0224887	-0.261971
NR_037172	-1.26027	7.01464	-6.27245	0.00115567	0.0224887	-0.262034
TCONS_00010548	1.27245	7.83377	6.26723	0.00116032	0.0224887	-0.266155
AI124845	-1.35475	7.6185	-6.26718	0.00116036	0.0224887	-0.266191
ENST00000452514	-1.26298	4.87601	-6.2633	0.00116383	0.0224887	-0.269259
ENST00000510360	-1.44076	8.23977	-6.26252	0.00116453	0.0224887	-0.269876
ENST00000445956	-1.57851	7.10534	-6.26224	0.00116478	0.0224887	-0.270096
ENST00000457321	-1.25775	8.32982	-6.25892	0.00116776	0.0224887	-0.272723
ENST00000508241	1.4051	12.1507	6.25704	0.00116944	0.0224887	-0.274204
ENST00000520575	1.39623	5.55298	6.25486	0.00117141	0.0224887	-0.275929
ENST00000563826	1.42381	5.36948	6.25479	0.00117147	0.0224887	-0.275987
ENST00000415114	1.33367	7.6588	6.25265	0.0011734	0.0224887	-0.277676
TCONS_00001436	-1.49659	6.32496	-6.2489	0.0011768	0.0224887	-0.280647
ENST00000447262	1.51471	5.72438	6.2488	0.00117689	0.0224887	-0.280729
uc004czn.4	-1.42676	7.42173	-6.24713	0.0011784	0.0224887	-0.282044
NR_045756	1.40462	6.26468	6.24689	0.00117862	0.0224887	-0.282236
TCONS_00015069	1.40341	5.34249	6.24653	0.00117895	0.0224887	-0.282521
TCONS_00011889	1.28833	8.48607	6.24649	0.00117899	0.0224887	-0.282555
ENST00000411431	-1.323	8.10766	-6.24566	0.00117974	0.0224887	-0.283215
ENST00000461398	1.88257	5.21603	6.24432	0.00118096	0.0224887	-0.284275
TCONS_00024430	-1.30507	9.9954	-6.23913	0.00118569	0.0224887	-0.288384
ENST00000415702	-1.36911	7.14099	-6.23874	0.00118605	0.0224887	-0.288694
ENST00000509782	1.34565	6.55182	6.23845	0.00118631	0.0224887	-0.288926
NR_024330	-1.89584	9.81239	-6.23761	0.00118709	0.0224887	-0.289594
ENST00000512349	-1.57755	5.80635	-6.23552	0.001189	0.0224887	-0.291253
ENST00000422038	-1.38486	5.09202	-6.23534	0.00118917	0.0224887	-0.291396
ENST00000555732	-1.34612	8.49497	-6.23419	0.00119022	0.0224887	-0.292304
ENST00000527695	-1.25678	6.92656	-6.2294	0.00119463	0.0224887	-0.296111
ENST00000550680	1.48686	9.62061	6.22816	0.00119578	0.0224887	-0.297097
AI161328	1.24813	6.21093	6.22726	0.00119661	0.0224887	-0.297807
NR_047525	1.38928	9.26164	6.227	0.00119685	0.0224887	-0.298017
TCONS_00024752	1.62324	6.29033	6.2255	0.00119824	0.0224887	-0.299208
uc003cri.3	1.38808	10.5011	6.22526	0.00119845	0.0224887	-0.299395
ENST00000582983	-1.29066	8.15544	-6.22404	0.00119959	0.0224887	-0.300368
ENST00000524005	1.30056	5.4287	6.22332	0.00120025	0.0224887	-0.300938
TCONS_00007128	1.33776	5.22544	6.22162	0.00120183	0.0224887	-0.302288
NR_029383	1.34416	9.20133	6.22098	0.00120243	0.0224887	-0.302798
ENST00000558235	1.24464	8.79	6.21939	0.0012039	0.0224887	-0.304062
uc021vqj.1	-1.28773	6.10517	-6.21851	0.00120472	0.0224887	-0.304759
ENST00000564479	1.24369	7.4863	6.21763	0.00120554	0.0224887	-0.305461
ENST00000411754	1.54845	5.4884	6.21715	0.00120599	0.0224887	-0.305845
TCONS_00021053	-1.55615	7.30451	-6.21658	0.00120653	0.0224887	-0.306302
ENST00000404689	1.53182	5.9725	6.21467	0.00120831	0.0224887	-0.307816
ENST00000553176	-2.23652	6.57458	-6.2143	0.00120866	0.0224887	-0.308117
ENST00000509139	-1.39468	6.04141	-6.21381	0.00120911	0.0224887	-0.308501
ENST00000574741	-1.53339	6.33928	-6.21238	0.00121046	0.0224887	-0.309644
TCONS_00017723	-1.37875	8.94113	-6.21106	0.00121169	0.0224887	-0.310693
TCONS_00012660	1.36954	8.2579	6.21065	0.00121207	0.0224887	-0.311017
ENST00000452982	-1.26991	9.18312	-6.20972	0.00121295	0.0224887	-0.311762
uc002wjz.2	-1.36662	5.37221	-6.20958	0.00121308	0.0224887	-0.311874
ENST00000442020	1.54089	5.76555	6.20915	0.00121348	0.0224887	-0.312212
ENST00000445784	1.24984	7.01216	6.20835	0.00121423	0.0224887	-0.31285
ENST00000518749	1.454	8.11882	6.20754	0.001215	0.0224887	-0.313497
ENST00000580528	-1.6803	5.39992	-6.20727	0.00121525	0.0224887	-0.313713
ENST00000421380	1.25928	4.97129	6.20713	0.00121538	0.0224887	-0.313824
ENST00000513255	1.24114	6.6839	6.20468	0.00121769	0.0224887	-0.315773
ENST00000564287	1.26121	8.12808	6.20426	0.00121809	0.0224887	-0.316111
NR_073021	1.33847	9.58069	6.20377	0.00121854	0.0224887	-0.316498
ENST00000511514	1.36974	5.97659	6.20108	0.00122109	0.0225142	-0.318647
ENST00000542992	-1.29763	6.36791	-6.19881	0.00122325	0.0225142	-0.320461
ENST00000526061	1.25519	7.63327	6.1969	0.00122505	0.0225142	-0.32198
ENST00000427619	-1.36069	9.38924	-6.19631	0.00122561	0.0225142	-0.322449
ENST00000425991	1.28687	12.8123	6.19396	0.00122785	0.0225142	-0.324325
ENST00000512035	-1.35595	8.25447	-6.19329	0.00122849	0.0225142	-0.32486
ENST00000503950	1.28693	5.87962	6.19229	0.00122944	0.0225142	-0.32566
TCONS_00014341	1.41339	5.39477	6.19067	0.00123099	0.0225142	-0.326957
ENST00000568280	-1.26534	7.04403	-6.19027	0.00123138	0.0225142	-0.327279
uc002pnr.1	1.5161	9.55792	6.19014	0.0012315	0.0225142	-0.327381
ENST00000534505	1.40759	6.4964	6.18713	0.00123438	0.0225268	-0.329788
ENST00000559481	-1.49401	7.71926	-6.18679	0.00123471	0.0225268	-0.330059
TCONS_00015031	1.29807	5.62172	6.18579	0.00123566	0.0225268	-0.330858
ENST00000431027	-1.55202	5.09765	-6.17291	0.00124809	0.0227321	-0.341165
ENST00000524987	1.23547	6.35044	6.17153	0.00124943	0.0227352	-0.342267
uc001czu.3	-1.60593	5.30575	-6.1687	0.00125218	0.0227437	-0.344533
uc003jld.1	1.28891	5.97809	6.16619	0.00125463	0.0227437	-0.346547
ENST00000457465	-1.23296	6.27466	-6.16578	0.00125503	0.0227437	-0.346877
TCONS_00024777	-1.28852	6.55438	-6.16278	0.00125797	0.0227437	-0.349285
ENST00000567545	-1.47354	6.94129	-6.16141	0.00125931	0.0227437	-0.350383
ENST00000579339	-1.27096	6.2825	-6.16138	0.00125934	0.0227437	-0.350407
ENST00000573301	-1.39947	9.65386	-6.16063	0.00126008	0.0227437	-0.351012
ENST00000331425	1.30517	8.74111	6.15809	0.00126258	0.0227437	-0.353051
ENST00000445242	-1.30687	8.21078	-6.15682	0.00126383	0.0227437	-0.354069
ENST00000546798	-1.36833	8.78775	-6.1568	0.00126385	0.0227437	-0.354086
ENST00000425587	1.23346	10.3667	6.15584	0.0012648	0.0227437	-0.354859
uc002ctj.1	-1.73256	5.49056	-6.15527	0.00126535	0.0227437	-0.355312
ENST00000546738	-1.38993	4.92073	-6.15431	0.0012663	0.0227437	-0.356086
TCONS_00004225	-1.26526	7.37012	-6.15253	0.00126806	0.0227437	-0.357512
ENST00000558470	-1.56028	5.30771	-6.15205	0.00126853	0.0227437	-0.357899
ENST00000560870	1.28811	6.9927	6.15198	0.0012686	0.0227437	-0.357956
ENST00000421181	1.28655	9.76415	6.14986	0.0012707	0.0227603	-0.359658
ENST00000545904	1.38028	6.24993	6.14732	0.00127323	0.0227672	-0.361705
ENST00000421997	-1.51583	7.65425	-6.14711	0.00127343	0.0227672	-0.361868
ENST00000435027	1.47345	5.48299	6.14367	0.00127685	0.0227748	-0.364637
NR_027455	-1.2893	7.03565	-6.14268	0.00127784	0.0227748	-0.365435
TCONS_00006582	-1.45726	7.42959	-6.14112	0.0012794	0.0227748	-0.366691
ENST00000439074	1.24011	8.03399	6.14102	0.0012795	0.0227748	-0.366774
ENST00000566521	1.28104	6.21084	6.14082	0.00127971	0.0227748	-0.366937
ENST00000575911	-1.33515	6.48547	-6.13772	0.00128281	0.0228091	-0.369432
ENST00000575647	-1.45802	8.7372	-6.13406	0.00128648	0.0228279	-0.372381
TCONS_00028564	1.45232	6.92573	6.13221	0.00128834	0.0228279	-0.373867
TCONS_00000779	-1.41548	8.13309	-6.13059	0.00128997	0.0228279	-0.375172
NR_036473	-1.23458	4.86223	-6.12806	0.00129253	0.0228279	-0.377215
ENST00000572590	1.2525	5.23107	6.1277	0.00129289	0.0228279	-0.377505
NR_023319	-1.27001	9.21498	-6.12573	0.00129489	0.0228279	-0.379099
NR_040513	-1.24247	7.91839	-6.12422	0.00129642	0.0228279	-0.380318
ENST00000427609	1.23499	7.11769	6.12407	0.00129657	0.0228279	-0.380437
ENST00000576762	-1.40757	6.07262	-6.1236	0.00129705	0.0228279	-0.380818
ENST00000520017	1.25768	6.80423	6.12352	0.00129712	0.0228279	-0.380875
TCONS_00014874	1.22618	6.50806	6.12148	0.0012992	0.0228279	-0.382526
uc001pnk.1	-1.48922	7.8772	-6.12007	0.00130063	0.0228279	-0.383664
TCONS_00006223	-1.37971	5.53044	-6.11985	0.00130086	0.0228279	-0.383841
HMlincRNA1622+	-1.49596	5.79908	-6.11891	0.00130181	0.0228279	-0.384599
TCONS_00022272	-1.83875	6.91346	-6.11828	0.00130246	0.0228279	-0.385109
TCONS_00010392	-1.68174	5.95424	-6.11656	0.00130421	0.0228279	-0.386499
uc002vea.3	1.258	6.8955	6.11551	0.00130529	0.0228279	-0.387346
BU662692	1.33531	7.26489	6.1148	0.00130601	0.0228279	-0.387921
chr9:136300550-136313775+	-1.27138	5.76964	-6.11283	0.00130803	0.0228279	-0.389512
uc001vmc.3	1.62544	6.39435	6.11223	0.00130865	0.0228279	-0.390002
ENST00000441295	2.14905	8.22683	6.11132	0.00130959	0.0228279	-0.39074
ENST00000513940	1.25918	8.50965	6.10894	0.00131202	0.0228279	-0.392658
ENST00000421606	-1.40071	5.73058	-6.10704	0.00131398	0.0228279	-0.394196
uc010xbm.2	1.25707	7.54283	6.10627	0.00131478	0.0228279	-0.394821
NR_030775	-2.0842	5.67372	-6.10619	0.00131486	0.0228279	-0.394884
uc001mjm.2	-1.39097	8.68142	-6.10449	0.00131662	0.0228279	-0.396262
ENST00000502496	1.30725	6.77291	6.10303	0.00131813	0.0228279	-0.397446
ENST00000422253	1.6233	8.0693	6.103	0.00131816	0.0228279	-0.397471
ENST00000437012	-1.22658	7.03955	-6.10207	0.00131912	0.0228279	-0.398221
TCONS_00018561	1.44199	4.97906	6.10192	0.00131927	0.0228279	-0.398344
ENST00000531268	1.29512	9.40403	6.10045	0.00132079	0.0228279	-0.399531
TCONS_00026498	1.31735	4.94714	6.09985	0.00132142	0.0228279	-0.400019
ENST00000432386	-1.28104	5.65752	-6.09604	0.00132538	0.0228761	-0.403111
NR_033819	-1.39431	7.58866	-6.09391	0.0013276	0.022894	-0.404836
ENST00000439562	-1.24521	7.3818	-6.09137	0.00133026	0.0228987	-0.406899
uc.244-	1.23985	6.25438	6.09127	0.00133035	0.0228987	-0.406975
HMlincRNA1397-	-1.56695	7.88363	-6.0892	0.00133253	0.0228987	-0.40866
ENST00000356133	-1.50532	5.48797	-6.08866	0.00133309	0.0228987	-0.409094
TCONS_00023629	-1.62563	4.95396	-6.08802	0.00133376	0.0228987	-0.409611
ENST00000441820	1.37878	6.42285	6.08581	0.00133608	0.0228987	-0.411407
ENST00000504280	1.39575	5.84981	6.0841	0.00133788	0.0228987	-0.412801
TCONS_00025784	1.23515	6.27515	6.08377	0.00133823	0.0228987	-0.413064
ENST00000435968	1.29732	6.82563	6.08129	0.00134084	0.0228987	-0.415081
ENST00000454672	-1.23339	5.62079	-6.08098	0.00134116	0.0228987	-0.415329
NR_037661	-1.50446	8.24392	-6.08085	0.00134131	0.0228987	-0.41544
ENST00000561588	-1.50183	6.11515	-6.0802	0.00134199	0.0228987	-0.415968
ENST00000449351	-1.62043	6.54303	-6.07851	0.00134377	0.0229089	-0.417335
ENST00000540619	-1.60277	9.21613	-6.07695	0.00134542	0.022917	-0.418604
ENST00000445485	1.2804	5.91189	6.07472	0.00134779	0.0229361	-0.420417
ENST00000415129	-1.38533	5.94167	-6.07323	0.00134938	0.0229361	-0.421633
ENST00000429224	1.40347	6.10594	6.07078	0.00135199	0.0229361	-0.423629
NR_045408	-1.8939	9.36506	-6.06925	0.00135361	0.0229361	-0.424867
TCONS_00009882	1.24802	5.9762	6.06823	0.0013547	0.0229361	-0.425702
TCONS_00006523	-1.63936	5.00225	-6.06775	0.00135522	0.0229361	-0.426096
TCONS_00019735	1.31927	5.71796	6.06646	0.00135659	0.0229361	-0.427142
ENST00000457006	1.56592	9.0094	6.06611	0.00135697	0.0229361	-0.427427
ENST00000442749	1.40986	6.21305	6.06593	0.00135716	0.0229361	-0.427571
ENST00000528510	1.31259	7.3597	6.06479	0.00135838	0.0229368	-0.428502
ENST00000570202	-1.40422	7.56843	-6.0616	0.0013618	0.0229747	-0.431101
ENST00000413103	1.28395	6.76538	6.05596	0.00136788	0.0230319	-0.435704
uc010tgr.1	-1.39959	7.89597	-6.05481	0.00136912	0.0230319	-0.436639
ENST00000439182	1.31123	5.14093	6.05377	0.00137025	0.0230319	-0.437486
uc001zlf.1	1.54542	10.3505	6.05142	0.0013728	0.0230319	-0.439408
ENST00000462560	-1.29871	5.31464	-6.05019	0.00137413	0.0230319	-0.440413
ENST00000476815	-1.30241	4.89897	-6.05006	0.00137427	0.0230319	-0.440514
ENST00000413220	-1.26253	5.82942	-6.04972	0.00137464	0.0230319	-0.440792
ENST00000500197	1.47364	6.47904	6.0489	0.00137552	0.0230319	-0.441459
ENST00000416275	-1.27564	5.27981	-6.04769	0.00137685	0.0230319	-0.442452
ENST00000509307	-1.4571	5.54809	-6.04751	0.00137704	0.0230319	-0.442594
ENST00000502300	1.22277	6.97655	6.04316	0.00138179	0.02304	-0.446153
TCONS_00029280	-1.24888	5.53517	-6.0429	0.00138207	0.02304	-0.446364
NR_037910	1.31923	7.09224	6.04203	0.00138302	0.02304	-0.447076
ENST00000561473	1.27279	5.94119	6.04087	0.00138429	0.02304	-0.44802
ENST00000422216	-1.90502	7.59108	-6.03949	0.0013858	0.02304	-0.449151
TCONS_00024450	1.52641	6.44401	6.03834	0.00138706	0.02304	-0.450089
ENST00000450854	1.32502	5.50433	6.03444	0.00139135	0.02304	-0.45328
ENST00000533992	1.30305	5.47661	6.0337	0.00139217	0.02304	-0.45389
ENST00000569905	-1.37258	7.97146	-6.03061	0.00139558	0.02304	-0.456421
ENST00000568958	1.37397	8.45626	6.03054	0.00139566	0.02304	-0.456476
TCONS_00013319	1.41093	7.70415	6.02693	0.00139966	0.02304	-0.459437
ENST00000504785	1.21901	6.5963	6.02663	0.00139999	0.02304	-0.459682
TCONS_00024694	-1.50548	6.21266	-6.02516	0.00140162	0.02304	-0.460887
ENST00000540802	1.2267	5.04379	6.02426	0.00140262	0.02304	-0.461624
TCONS_00019368	-1.23761	7.4147	-6.02332	0.00140367	0.02304	-0.462397
ENST00000551571	-1.32906	7.37142	-6.02263	0.00140443	0.02304	-0.462955
NR_033950	1.31396	7.234	6.022	0.00140513	0.02304	-0.463474
ENST00000416028	-1.74564	7.61856	-6.02078	0.0014065	0.02304	-0.464478
TCONS_00023557	1.34625	6.5519	6.02044	0.00140688	0.02304	-0.464755
ENST00000454123	1.2277	4.92909	6.0186	0.00140893	0.02304	-0.466266
ENST00000442780	1.75912	9.7414	6.01731	0.00141037	0.02304	-0.46732
TCONS_00029245	1.51399	7.92234	6.01701	0.00141071	0.02304	-0.46757
ENST00000576975	-1.49711	6.46822	-6.01701	0.00141071	0.02304	-0.467572
BE327666	1.56526	6.43557	6.0167	0.00141106	0.02304	-0.467826
chr2:102247075-102260750-	1.21803	6.9079	6.01419	0.00141387	0.02304	-0.469881
ENST00000503484	-1.41061	8.74212	-6.01324	0.00141494	0.02304	-0.470662
TCONS_00004869	1.20812	7.19778	6.01309	0.00141511	0.02304	-0.47079
uc021qut.1	-1.4272	6.48274	-6.01296	0.00141525	0.02304	-0.470892
uc.92-	1.34063	6.31534	6.01147	0.00141693	0.02304	-0.472121
AA372893	1.26246	5.46101	6.01105	0.00141739	0.02304	-0.472458
ENST00000567122	-1.9089	5.44495	-6.0104	0.00141813	0.02304	-0.472995
uc003jox.1	-1.7694	6.17973	-6.00974	0.00141887	0.02304	-0.473538
TCONS_00018331	1.34631	8.24994	6.00971	0.0014189	0.02304	-0.473559
TCONS_00025076	1.45009	7.6507	6.00928	0.00141939	0.02304	-0.473916
ENST00000418149	-1.2337	7.78401	-6.00883	0.0014199	0.02304	-0.474287
ENST00000437930	1.47141	6.00356	6.0086	0.00142016	0.02304	-0.474476
ENST00000562409	-1.32931	5.83997	-6.00713	0.00142181	0.023042	-0.475679
ENST00000527908	-1.55144	8.23145	-6.00639	0.00142266	0.023042	-0.476291
NR_037710	1.21302	9.75345	6.00426	0.00142506	0.0230618	-0.478038
ENST00000472120	-1.41242	5.95266	-6.00137	0.00142835	0.0230743	-0.48042
ENST00000416090	1.24754	5.62637	6.00056	0.00142927	0.0230743	-0.481087
TCONS_00018082	-1.34573	5.65664	-5.99928	0.00143072	0.0230743	-0.482137
ENST00000545631	1.25765	11.0705	5.99902	0.00143102	0.0230743	-0.482352
ENST00000553729	-1.33402	6.74983	-5.99836	0.00143177	0.0230743	-0.482894
uc002zrw.1	-1.27171	6.6444	-5.99691	0.00143342	0.0230818	-0.484086
TCONS_00006224	1.26773	7.37852	5.99453	0.00143614	0.0231065	-0.486047
ENST00000503403	-1.25765	5.60544	-5.99171	0.00143936	0.0231393	-0.488371
ENST00000457369	-1.53566	6.23629	-5.99024	0.00144105	0.0231473	-0.489585
ENST00000423045	1.34914	5.14805	5.989	0.00144247	0.0231509	-0.490601
ENST00000432960	1.19913	5.73398	5.98286	0.00144955	0.0232405	-0.495669
chr2:234448625-234460150+	-1.21584	6.45883	-5.98209	0.00145044	0.0232405	-0.496305
ENST00000580199	-1.51906	5.25196	-5.97933	0.00145364	0.023268	-0.498585
uc002pxm.1	-1.41333	7.23706	-5.97854	0.00145455	0.023268	-0.499233
TCONS_00028490	1.22338	5.18682	5.97498	0.00145868	0.023315	-0.502172
ENST00000424705	1.41585	7.68822	5.9723	0.00146181	0.0233154	-0.504389
ENST00000483289	1.3418	8.26535	5.96938	0.00146521	0.0233154	-0.506797
AI203030	1.32822	7.48308	5.96895	0.00146572	0.0233154	-0.507152
TCONS_00015339	-1.72628	6.39335	-5.96733	0.00146763	0.0233154	-0.5085
TCONS_00016144	1.33744	7.4286	5.96643	0.00146867	0.0233154	-0.509236
TCONS_00021393	-1.23555	5.61864	-5.96633	0.00146879	0.0233154	-0.509324
NR_073043	-1.53779	7.87506	-5.9659	0.0014693	0.0233154	-0.509678
TCONS_00013551	-1.56749	7.22441	-5.96573	0.0014695	0.0233154	-0.509819
ENST00000470677	1.51212	5.56599	5.96478	0.00147061	0.0233154	-0.510605
ENST00000545750	1.35902	5.50385	5.96357	0.00147204	0.0233154	-0.511607
ENST00000443837	-1.34886	7.81745	-5.96356	0.00147205	0.0233154	-0.511614
NR_046289	-1.21523	6.77373	-5.96024	0.00147596	0.0233154	-0.514366
NR_047680	1.22857	6.63937	5.95841	0.00147812	0.0233154	-0.515877
TCONS_00010663	1.2944	6.37391	5.95832	0.00147822	0.0233154	-0.51595
ENST00000568337	-1.24053	5.24492	-5.95772	0.00147893	0.0233154	-0.516446
ENST00000511707	1.4122	6.76322	5.95683	0.00147998	0.0233154	-0.517183
ENST00000421619	1.25481	7.49133	5.9551	0.00148204	0.0233154	-0.518623
ENST00000452639	-1.70872	7.59074	-5.9538	0.00148358	0.0233154	-0.519695
uc021rpq.1	1.24279	7.86744	5.95353	0.0014839	0.0233154	-0.519918
ENST00000580960	-1.31728	5.31712	-5.95319	0.00148431	0.0233154	-0.520206
AK001840	1.58605	9.03131	5.95304	0.00148448	0.0233154	-0.520327
ENST00000439336	1.22068	4.64729	5.95253	0.00148509	0.0233154	-0.520753
ENST00000442483	-1.42969	6.50097	-5.95105	0.00148685	0.0233154	-0.521977
ENST00000565041	-1.36763	5.68341	-5.95044	0.00148757	0.0233154	-0.522482
TCONS_00028426	1.24172	5.52111	5.94939	0.00148882	0.0233154	-0.52335
ENST00000534789	-1.32836	7.08504	-5.94851	0.00148987	0.0233154	-0.524083
ENST00000427154	1.31268	10.2216	5.94644	0.00149235	0.0233263	-0.525801
ENST00000541416	-1.57958	8.12151	-5.94522	0.00149381	0.0233263	-0.526816
uc002lat.3	1.29702	7.1557	5.94492	0.00149417	0.0233263	-0.527065
ENST00000425476	-1.30355	6.06565	-5.94222	0.0014974	0.0233399	-0.529301
TCONS_00029621	1.19829	5.55486	5.94102	0.00149884	0.0233399	-0.530299
CA423547	1.35567	6.39745	5.94052	0.00149944	0.0233399	-0.530713
TCONS_00013628	-1.73998	5.26725	-5.93918	0.00150105	0.0233399	-0.531827
AV730200	1.39957	9.17107	5.93876	0.00150156	0.0233399	-0.532176
TCONS_00027424	-1.46065	5.80301	-5.9382	0.00150224	0.0233399	-0.532645
ENST00000531654	-1.49657	4.86214	-5.9365	0.00150428	0.023353	-0.534057
TCONS_00016500	-1.51076	6.73821	-5.93055	0.00151148	0.0234289	-0.539003
TCONS_00012278	-1.22267	7.75253	-5.93046	0.00151158	0.0234289	-0.539073
TCONS_00008317	-1.325	9.30422	-5.92601	0.001517	0.0234733	-0.542779
ENST00000523024	1.26394	7.57089	5.92543	0.0015177	0.0234733	-0.54326
ENST00000437838	-1.18499	6.39301	-5.9244	0.00151896	0.0234733	-0.544117
TCONS_00006933	1.20278	7.57225	5.92326	0.00152035	0.0234733	-0.545069
NR_045218	1.30969	7.51489	5.92315	0.00152048	0.0234733	-0.545157
TCONS_00010369	-1.82645	5.89756	-5.92075	0.00152342	0.0235001	-0.547159
ENST00000485225	1.55834	5.74018	5.91921	0.0015253	0.0235104	-0.548437
uc010ayf.1	1.23065	7.22076	5.9166	0.00152851	0.0235412	-0.550616
ENST00000448536	1.32728	5.1247	5.91408	0.00153161	0.0235703	-0.552719
ENST00000422124	-1.23614	9.83347	-5.91257	0.00153347	0.0235791	-0.553974
ENST00000497811	-1.4592	7.79347	-5.91112	0.00153526	0.0235791	-0.555184
TCONS_00004444	-1.5009	6.42275	-5.91067	0.00153582	0.0235791	-0.555562
uc003hkh.3	-1.28485	9.62897	-5.907	0.00154035	0.0236046	-0.558621
ENST00000517785	-1.69611	5.19046	-5.90637	0.00154114	0.0236046	-0.559148
TCONS_00007945	1.27962	4.45619	5.90495	0.0015429	0.0236046	-0.560334
ENST00000531661	-1.45606	8.84286	-5.90453	0.00154343	0.0236046	-0.56069
TCONS_00020140	-1.3713	5.10064	-5.90403	0.00154404	0.0236046	-0.561103
TCONS_00011852	1.20152	6.7573	5.90343	0.0015448	0.0236046	-0.561609
ENST00000429159	-1.63979	6.93403	-5.90248	0.00154597	0.0236046	-0.562396
NR_038444	1.61255	8.62657	5.90019	0.00154883	0.0236093	-0.56431
ENST00000546086	1.35783	6.062	5.89986	0.00154924	0.0236093	-0.56459
NR_024355	1.20386	7.11803	5.89815	0.00155137	0.0236093	-0.566015
ENST00000451510	-1.24073	7.41715	-5.89749	0.0015522	0.0236093	-0.566568
NR_033358	-1.18467	6.33613	-5.89737	0.00155235	0.0236093	-0.566668
DB224754	1.56825	6.69171	5.89487	0.00155549	0.0236386	-0.568764
ENST00000453331	-1.21391	6.12445	-5.89249	0.00155848	0.0236443	-0.570754
ENST00000419160	-1.26647	4.9041	-5.89104	0.00156029	0.0236443	-0.571961
ENST00000427392	1.22181	10.5509	5.88928	0.00156251	0.0236443	-0.573436
uc010gub.1	-1.67084	8.81942	-5.88856	0.00156342	0.0236443	-0.57404
ENST00000530196	1.48724	9.39605	5.88807	0.00156403	0.0236443	-0.574447
TCONS_00025361	1.22464	5.87156	5.88793	0.00156421	0.0236443	-0.574564
TCONS_00014161	-1.22302	6.61807	-5.88756	0.00156468	0.0236443	-0.574875
TCONS_00016657	1.30246	4.87838	5.88684	0.00156559	0.0236443	-0.575479
ENST00000526458	1.21601	7.73604	5.88541	0.0015674	0.0236533	-0.576677
ENST00000564305	-1.54731	8.44029	-5.88248	0.00157112	0.0236534	-0.579137
ENST00000505364	-1.36727	7.95079	-5.88176	0.00157202	0.0236534	-0.579733
uc.30+	-1.25817	7.81094	-5.88005	0.0015742	0.0236534	-0.581171
TCONS_00029696	1.22875	8.60454	5.88	0.00157426	0.0236534	-0.581211
ENST00000536673	1.20619	7.40101	5.8797	0.00157464	0.0236534	-0.581461
TCONS_00008604	-1.37766	11.089	-5.87908	0.00157544	0.0236534	-0.581984
ENST00000505114	1.86439	9.33673	5.87806	0.00157673	0.0236534	-0.582838
TCONS_00016398	1.56647	7.29608	5.87774	0.00157713	0.0236534	-0.583103
TCONS_00001707	1.25624	6.84141	5.87446	0.00158133	0.023698	-0.585857
ENST00000506670	-1.36666	7.82461	-5.87206	0.0015844	0.0237257	-0.587873
ENST00000517726	1.25044	8.50766	5.87044	0.00158648	0.0237325	-0.589236
TCONS_00004371	1.22054	6.22813	5.8698	0.00158729	0.0237325	-0.589767
ENST00000576313	1.2553	5.71726	5.86859	0.00158886	0.0237377	-0.590788
ENST00000444529	-1.84883	9.35991	-5.85791	0.00160264	0.0239253	-0.599759
ENST00000530526	1.49423	6.79952	5.85349	0.0016084	0.0239716	-0.603479
TCONS_00010757	1.25945	5.30761	5.8524	0.00160982	0.0239716	-0.604396
TCONS_00026129	-1.26398	7.44116	-5.85181	0.00161059	0.0239716	-0.604896
HMlincRNA181-	1.56775	8.90356	5.85061	0.00161216	0.0239716	-0.605905
ENST00000526795	2.16088	6.48996	5.85013	0.00161279	0.0239716	-0.606313
uc021sld.1	1.46086	5.1177	5.84867	0.0016147	0.0239716	-0.607544
ENST00000515122	-1.24024	8.24395	-5.84824	0.00161526	0.0239716	-0.607899
TCONS_00023574	1.17729	7.53084	5.84681	0.00161714	0.0239716	-0.609107
TCONS_00020965	1.49858	4.81513	5.84437	0.00162034	0.0239716	-0.611163
TCONS_00016119	1.27179	7.91169	5.84352	0.00162146	0.0239716	-0.611883
ENST00000564390	-1.3999	8.75873	-5.84271	0.00162253	0.0239716	-0.612567
ENST00000453309	1.37856	6.13858	5.84177	0.00162376	0.0239716	-0.613354
CA391722	-1.19916	6.35679	-5.84068	0.00162521	0.0239716	-0.614278
ENST00000437014	-1.51368	6.84297	-5.83904	0.00162737	0.0239716	-0.615662
uc003bcm.3	1.20498	7.91043	5.83837	0.00162826	0.0239716	-0.616227
ENST00000433645	-1.29405	6.36245	-5.83725	0.00162974	0.0239716	-0.617174
DA195606	1.94094	7.6471	5.83484	0.00163293	0.0239716	-0.6192
BX957058	-1.18265	8.06257	-5.83484	0.00163293	0.0239716	-0.619202
TCONS_00014937	-1.53831	6.80816	-5.83275	0.0016357	0.0239716	-0.620967
uc003jae.2	1.43925	6.2321	5.83199	0.00163671	0.0239716	-0.621609
NR_038316	-1.58073	7.71767	-5.83166	0.00163716	0.0239716	-0.621893
TCONS_00020594	1.17387	5.72464	5.82869	0.00164112	0.0239716	-0.624402
TCONS_00017146	-1.26965	5.90083	-5.82842	0.00164148	0.0239716	-0.624628
ENST00000567465	1.76196	5.12822	5.82822	0.00164175	0.0239716	-0.624797
ENST00000440887	1.24478	7.00872	5.82792	0.00164214	0.0239716	-0.625047
ENST00000557642	-1.30508	7.80466	-5.82687	0.00164355	0.0239716	-0.625937
TCONS_00028349	1.29861	7.03346	5.82652	0.00164401	0.0239716	-0.62623
ENST00000452363	1.37636	6.10047	5.82636	0.00164422	0.0239716	-0.626366
ENST00000443030	-1.26769	6.66287	-5.82629	0.00164432	0.0239716	-0.626428
ENST00000508534	-1.60874	6.12238	-5.82441	0.00164684	0.0239716	-0.628015
ENST00000540814	1.33153	5.63178	5.82393	0.00164748	0.0239716	-0.628419
HMlincRNA629+	-1.25413	6.48128	-5.8234	0.00164819	0.0239716	-0.62887
ENST00000551849	-1.28273	8.35781	-5.82301	0.00164872	0.0239716	-0.6292
uc022anm.1	1.25568	5.69193	5.82215	0.00164987	0.0239716	-0.629926
uc002mxa.3	1.57404	6.12165	5.82145	0.00165081	0.0239716	-0.630523
HMlincRNA577+	1.19469	5.89692	5.82113	0.00165125	0.0239716	-0.630795
ENST00000580082	-1.20292	7.47665	-5.821	0.00165142	0.0239716	-0.630903
uc002nxe.3	-1.39263	5.48353	-5.82014	0.00165258	0.0239716	-0.631631
ENST00000509866	1.23604	6.45837	5.81895	0.00165417	0.0239769	-0.632634
ENST00000506485	-1.61881	9.2199	-5.81783	0.00165569	0.0239791	-0.633587
uc001vvi.3	1.2103	8.20675	5.81643	0.00165757	0.0239791	-0.634767
ENST00000421796	1.51139	5.97551	5.8161	0.00165802	0.0239791	-0.635051
ENST00000432331	1.38309	7.55928	5.81447	0.00166022	0.0239931	-0.636429
ENST00000503797	-1.24316	7.59719	-5.8115	0.00166425	0.0240274	-0.638948
ENST00000423062	-1.30515	5.86938	-5.80984	0.00166649	0.0240274	-0.640348
ENST00000441444	-1.40337	5.31903	-5.80888	0.00166781	0.0240274	-0.641167
TCONS_00012208	1.1692	5.36401	5.80769	0.00166942	0.0240274	-0.64217
ENST00000424612	1.31012	5.4037	5.80723	0.00167005	0.0240274	-0.642567
TCONS_00005993	1.17197	5.53837	5.80695	0.00167043	0.0240274	-0.6428
ENST00000544939	1.1871	7.91905	5.80627	0.00167136	0.0240274	-0.643379
uc011jsq.2	-1.23715	9.28461	-5.80402	0.00167443	0.0240274	-0.645288
ENST00000533775	-1.24586	9.65679	-5.80341	0.00167527	0.0240274	-0.645808
ENST00000504546	1.28387	7.52554	5.80269	0.00167625	0.0240274	-0.646416
ENST00000373171	-1.30221	9.39852	-5.80268	0.00167627	0.0240274	-0.646426
ENST00000418990	1.28563	7.20155	5.80144	0.00167796	0.0240274	-0.647477
ENST00000506059	1.16012	6.17642	5.80093	0.00167866	0.0240274	-0.647908
ENST00000445738	1.29662	5.93706	5.79815	0.00168248	0.0240644	-0.650272
ENST00000413288	1.36947	6.76617	5.79709	0.00168393	0.0240667	-0.651171
uc010ofi.1	-1.6658	5.57251	-5.79623	0.00168511	0.0240667	-0.6519
ENST00000454405	1.39702	7.54742	5.79423	0.00168786	0.0240681	-0.653596
ENST00000522393	1.15909	6.06189	5.79379	0.00168848	0.0240681	-0.653975
uc.355+	1.43315	7.92016	5.79346	0.00168892	0.0240681	-0.654248
ENST00000428936	1.29045	9.03616	5.7905	0.00169302	0.0241089	-0.656772
TCONS_00016580	-1.53288	6.42398	-5.78877	0.00169542	0.024113	-0.658242
TCONS_00008642	-1.48211	9.10317	-5.78781	0.00169674	0.024113	-0.659053
ENST00000522189	-1.35376	5.89431	-5.7876	0.00169704	0.024113	-0.659233
TCONS_00008088	-1.23738	4.61091	-5.78602	0.00169923	0.0241183	-0.660579
ENST00000518096	-1.49979	10.7192	-5.78555	0.00169988	0.0241183	-0.660977
uc001uiy.2	-1.40264	4.81963	-5.7821	0.00170469	0.0241688	-0.663911
ENST00000558508	-1.94683	5.09485	-5.78054	0.00170686	0.024182	-0.665237
TCONS_00006894	-1.44151	6.15651	-5.77756	0.00171104	0.0242235	-0.667781
DA631333	1.18025	4.42295	5.77483	0.00171486	0.02426	-0.670101
HMlincRNA1039-	1.16952	8.81774	5.77056	0.00172088	0.0243186	-0.673749
TCONS_00022868	-1.50809	7.39293	-5.76949	0.00172238	0.0243186	-0.674657
ENST00000423232	1.23156	6.13803	5.76923	0.00172276	0.0243186	-0.674883
ENST00000572574	-1.64834	6.69368	-5.76529	0.00172833	0.0243495	-0.678245
ENST00000567919	-1.159	8.03111	-5.76455	0.00172937	0.0243495	-0.678869
NR_026948	-1.27364	7.07551	-5.76448	0.00172948	0.0243495	-0.678934
TCONS_00009841	-1.38167	6.29494	-5.76366	0.00173063	0.0243495	-0.67963
TCONS_00018838	1.1902	6.386	5.76326	0.0017312	0.0243495	-0.679973
ENST00000418377	1.29094	7.8822	5.76113	0.00173423	0.0243745	-0.681792
ENST00000412197	1.18404	8.90069	5.75642	0.00174095	0.0244513	-0.685818
ENST00000482888	-1.44145	6.30797	-5.75132	0.00174825	0.0245054	-0.690174
DA446470	-1.49655	8.56644	-5.75129	0.0017483	0.0245054	-0.690201
uc003jza.4	1.35051	6.81245	5.75109	0.00174858	0.0245054	-0.690371
CD245860	1.31045	7.35889	5.74851	0.00175229	0.0245397	-0.692577
ENST00000455965	1.73561	4.96428	5.74591	0.00175606	0.0245674	-0.694809
ENST00000507842	1.30199	6.51041	5.74402	0.00175878	0.0245674	-0.696423
ENST00000418875	2.32738	6.37688	5.74376	0.00175916	0.0245674	-0.696647
TCONS_00003897	1.25571	5.04071	5.74365	0.00175932	0.0245674	-0.696744
ENST00000542763	-1.17675	6.77244	-5.73919	0.00176578	0.0245817	-0.700558
ENST00000431669	1.22266	5.62189	5.7391	0.00176591	0.0245817	-0.700637
TCONS_00006505	1.48744	5.14532	5.73894	0.00176615	0.0245817	-0.700778
ENST00000418907	1.16811	6.1808	5.73887	0.00176625	0.0245817	-0.700836
NR_026567	-1.44939	7.9006	-5.73858	0.00176667	0.0245817	-0.701083
ENST00000446989	1.371	7.237	5.73714	0.00176876	0.0245931	-0.702315
NR_033426	-1.23273	7.43997	-5.73548	0.00177118	0.0245931	-0.703742
TCONS_00023638	1.21329	7.28232	5.73452	0.00177258	0.0245931	-0.704565
ENST00000524962	1.19419	8.37467	5.7342	0.00177306	0.0245931	-0.704843
ENST00000455304	-1.38316	5.53111	-5.73368	0.00177381	0.0245931	-0.705282
ENST00000532913	1.1983	5.36593	5.72935	0.00178015	0.0246634	-0.708998
TCONS_00029531	-1.46869	9.5711	-5.72733	0.00178312	0.0246683	-0.710738
TCONS_00006757	-1.70261	5.50083	-5.72629	0.00178465	0.0246683	-0.711628
TCONS_00006200	-1.21945	6.19381	-5.72624	0.00178471	0.0246683	-0.711667
TCONS_00028418	-1.45756	9.80092	-5.72433	0.00178753	0.0246683	-0.713307
NR_037192	-1.70402	6.79824	-5.72429	0.00178759	0.0246683	-0.713343
uc021tyo.1	1.45786	10.3162	5.7235	0.00178875	0.0246683	-0.714022
ENST00000455126	1.2695	7.45417	5.72288	0.00178966	0.0246683	-0.714553
NR_003136	1.29617	8.4338	5.72222	0.00179065	0.0246683	-0.715126
uc003lrn.1	1.15213	7.48779	5.72071	0.00179288	0.0246756	-0.716423
TCONS_00016064	-1.46217	7.29134	-5.71897	0.00179546	0.0246756	-0.71792
ENST00000525328	-1.34263	7.22201	-5.71846	0.00179621	0.0246756	-0.718357
ENST00000579679	-1.14848	6.92971	-5.71843	0.00179625	0.0246756	-0.718381
TCONS_00029538	1.34083	6.09705	5.71637	0.00179931	0.0247002	-0.720154
TCONS_00010179	-1.1716	5.78645	-5.71546	0.00180066	0.0247013	-0.720934
ENST00000421599	-1.28218	7.82183	-5.70934	0.00180979	0.0247703	-0.726202
TCONS_00022691	-1.33124	5.39367	-5.7084	0.00181119	0.0247703	-0.727012
ENST00000550043	-1.48382	7.67196	-5.70825	0.00181142	0.0247703	-0.72714
uc004azj.1	-1.20008	6.91968	-5.70631	0.00181433	0.0247703	-0.728814
ENST00000448543	-1.47645	10.5329	-5.70603	0.00181474	0.0247703	-0.729051
TCONS_00001418	-1.54548	5.76535	-5.70554	0.00181548	0.0247703	-0.729477
ENST00000582695	1.33922	8.41473	5.70537	0.00181574	0.0247703	-0.729624
ENST00000435497	-1.53646	7.22846	-5.70527	0.00181588	0.0247703	-0.729704
ENST00000542875	1.14516	7.16946	5.70416	0.00181755	0.0247758	-0.730666
ENST00000468202	3.01386	12.3259	5.70293	0.0018194	0.0247795	-0.731721
uc002qxu.3	-1.33987	5.49793	-5.70228	0.00182037	0.0247795	-0.732281
ENST00000568403	-1.36337	5.2031	-5.7	0.00182382	0.0247976	-0.73425
ENST00000421161	-1.39831	5.22998	-5.69919	0.00182504	0.0247976	-0.734948
NR_045126	1.20989	6.10488	5.69813	0.00182663	0.0247976	-0.735857
ENST00000532002	-1.63118	6.58521	-5.69802	0.0018268	0.0247976	-0.735954
ENST00000541282	1.31473	6.91683	5.69715	0.00182811	0.0247981	-0.736703
TCONS_00012662	1.42304	7.22688	5.69352	0.00183363	0.0248437	-0.739842
TCONS_00019628	-1.40308	9.14181	-5.69325	0.00183403	0.0248437	-0.740071
ENST00000521471	-1.3464	7.15483	-5.69193	0.00183604	0.0248536	-0.741214
ENST00000352271	1.13915	4.83404	5.69065	0.00183798	0.0248626	-0.742314
TCONS_00008077	-1.38895	8.66818	-5.68809	0.00184189	0.0248811	-0.744527
ENST00000360485	1.15386	5.97902	5.68807	0.00184191	0.0248811	-0.744541
TCONS_00014747	-1.36629	6.58415	-5.68636	0.00184453	0.0248993	-0.746026
ENST00000544948	-1.57454	5.86007	-5.68448	0.0018474	0.0249087	-0.747647
ENST00000436028	-1.27174	7.2746	-5.68367	0.00184865	0.0249087	-0.748349
ENST00000444745	1.48164	7.92381	5.68339	0.00184907	0.0249087	-0.748588
ENST00000528468	1.22586	4.65205	5.68218	0.00185092	0.0249164	-0.74963
ENST00000414407	1.23485	8.64693	5.6807	0.00185321	0.0249299	-0.750916
ENST00000569291	-1.2769	7.71344	-5.67783	0.00185761	0.024939	-0.753394
ENST00000520603	-1.73502	8.91596	-5.67738	0.00185831	0.024939	-0.753784
NR_024519	-1.38416	7.76651	-5.67716	0.00185866	0.024939	-0.753978
NR_015380	-1.39735	5.34685	-5.67693	0.00185901	0.024939	-0.754179
ENST00000555862	1.17381	4.8642	5.67377	0.0018639	0.0249822	-0.756914
ENST00000499797	1.16847	5.61913	5.67318	0.0018648	0.0249822	-0.757422
ENST00000505784	1.19467	5.93931	5.67172	0.00186706	0.0249851	-0.758684
ENST00000457383	1.21267	5.7864	5.67138	0.00186759	0.0249851	-0.758979
uc003vag.1	1.25209	5.32125	5.67025	0.00186935	0.0249861	-0.75996
ENST00000448365	1.19403	4.95434	5.66968	0.00187023	0.0249861	-0.760453
chr10:102392025-102402450+	-1.13424	6.71613	-5.66639	0.00187534	0.0250372	-0.763299
ENST00000444266	-1.36467	7.20791	-5.66529	0.00187706	0.025043	-0.764258
ENST00000531139	-1.49702	8.4612	-5.66324	0.00188026	0.0250685	-0.766035
uc001upx.4	-1.55534	6.83942	-5.65917	0.00188664	0.0251233	-0.769566
NR_037647	-1.42122	7.48572	-5.6587	0.00188737	0.0251233	-0.76997
ENST00000540665	1.17088	7.86709	5.65814	0.00188825	0.0251233	-0.770457
TCONS_00021975	1.1962	5.59289	5.656	0.00189162	0.0251487	-0.772316
ENST00000434086	-1.19417	7.40605	-5.65529	0.00189274	0.0251487	-0.772936
TCONS_00025083	1.1817	7.49441	5.65392	0.0018949	0.0251601	-0.774124
ENST00000546734	-1.35876	9.07732	-5.64946	0.00190194	0.0252364	-0.777996
chr2:231247700-231258825-	-1.34457	6.92952	-5.64301	0.00191219	0.0253551	-0.783601
TCONS_00012028	1.12758	6.3882	5.6388	0.00191892	0.0253878	-0.787267
NR_046408	-1.43015	6.88762	-5.63848	0.00191942	0.0253878	-0.787544
TCONS_00013875	-1.2586	6.19195	-5.63828	0.00191975	0.0253878	-0.787718
ENST00000437785	-1.49939	6.20634	-5.6382	0.00191988	0.0253878	-0.78779
ENST00000457427	1.24191	6.25888	5.63721	0.00192147	0.0253916	-0.788657
TCONS_00023714	-1.21291	8.61957	-5.63165	0.00193039	0.0254795	-0.793492
ENST00000455607	1.23359	9.20942	5.63144	0.00193074	0.0254795	-0.793682
ENST00000569215	1.2514	6.40771	5.63056	0.00193215	0.0254807	-0.794443
TCONS_00016108	1.15826	6.37029	5.62788	0.00193649	0.0254807	-0.796786
ENST00000553584	-1.29192	6.66068	-5.62782	0.00193658	0.0254807	-0.796833
ENST00000433071	-1.42514	8.71332	-5.62764	0.00193688	0.0254807	-0.796993
TCONS_00025733	-1.82329	5.36615	-5.62733	0.00193738	0.0254807	-0.797265
TCONS_00006356	-1.34673	9.15081	-5.62611	0.00193935	0.0254846	-0.798325
ENST00000440665	1.18122	6.62117	5.62515	0.00194091	0.0254846	-0.799162
ENST00000422343	1.23093	10.2354	5.62472	0.00194161	0.0254846	-0.799541
ENST00000526984	1.28956	7.75132	5.62161	0.00194666	0.0255234	-0.802253
TCONS_00005965	-1.23828	6.71461	-5.62087	0.00194786	0.0255234	-0.802894
ENST00000542410	-1.39521	5.50341	-5.62019	0.00194897	0.0255234	-0.803492
TCONS_00022725	-2.03832	7.83312	-5.61892	0.00195103	0.0255234	-0.804597
ENST00000449749	-1.58552	6.75749	-5.6181	0.00195238	0.0255234	-0.805316
uc003jvf.1	-1.20698	7.3852	-5.61806	0.00195244	0.0255234	-0.805349
uc001dix.4	1.33396	6.44287	5.61679	0.00195452	0.0255335	-0.806462
TCONS_00026576	-1.14775	7.7677	-5.61544	0.00195672	0.0255451	-0.807636
ENST00000421140	-1.33556	7.4647	-5.61355	0.00195983	0.0255684	-0.809292
TCONS_00029071	1.53329	11.7523	5.61128	0.00196356	0.0255794	-0.811279
TCONS_00012346	-1.28786	5.29476	-5.61064	0.0019646	0.0255794	-0.811833
ENST00000453837	-1.12834	7.60155	-5.60992	0.00196579	0.0255794	-0.812466
ENST00000442072	1.16096	5.52445	5.60983	0.00196593	0.0255794	-0.81254
uc.41+	-1.31219	6.61619	-5.60877	0.00196768	0.0255851	-0.81347
NR_038889	-1.13842	8.26546	-5.60782	0.00196925	0.0255884	-0.814303
chrX:136212300-136224525+	1.16604	4.82501	5.60523	0.00197353	0.0255891	-0.816572
TCONS_00024814	-1.23292	6.8041	-5.60403	0.00197551	0.0255891	-0.817616
ENST00000463748	-1.44536	6.43738	-5.60302	0.00197718	0.0255891	-0.818502
uc010bls.1	1.37616	9.26501	5.60259	0.00197789	0.0255891	-0.818878
ENST00000540410	1.16587	7.5572	5.60181	0.00197919	0.0255891	-0.819565
TCONS_00022845	-1.35678	6.83513	-5.60161	0.00197952	0.0255891	-0.819737
uc002eda.3	-1.22902	6.83601	-5.60134	0.00197997	0.0255891	-0.819976
ENST00000579187	1.42812	11.3789	5.60045	0.00198145	0.0255891	-0.820753
ENST00000433432	-1.44824	6.47833	-5.59991	0.00198235	0.0255891	-0.82123
ENST00000411989	-1.39367	8.30259	-5.59968	0.00198272	0.0255891	-0.821424
uc021wmm.1	-1.509	6.12255	-5.59905	0.00198377	0.0255891	-0.821977
ENST00000412822	1.24879	6.09936	5.59721	0.00198683	0.0256115	-0.823587
HMlincRNA1172+	-1.15838	7.47327	-5.59329	0.00199339	0.0256423	-0.827029
AV732531	-1.29366	4.95724	-5.59286	0.0019941	0.0256423	-0.827403
ENST00000451438	1.11848	4.40668	5.59179	0.0019959	0.0256423	-0.828345
ENST00000433230	-1.38082	5.35165	-5.58993	0.00199901	0.0256423	-0.829974
TCONS_00019257	-1.37731	5.74047	-5.58923	0.00200018	0.0256423	-0.830585
AK054953	1.13994	7.38111	5.58841	0.00200156	0.0256423	-0.831305
TCONS_00019800	1.13353	7.11288	5.58664	0.00200453	0.0256423	-0.832856
ENST00000454003	1.24267	6.07477	5.58649	0.00200479	0.0256423	-0.832987
uc003azp.1	1.61343	6.97202	5.58555	0.00200638	0.0256423	-0.83382
ENST00000504573	1.46239	5.29197	5.58548	0.0020065	0.0256423	-0.83388
ENST00000554433	1.57956	6.88179	5.58503	0.00200726	0.0256423	-0.834274
NR_046102	-1.9254	5.41657	-5.58462	0.00200794	0.0256423	-0.834631
TCONS_00013523	1.3396	4.84413	5.58399	0.002009	0.0256423	-0.835182
TCONS_00028250	-1.31899	5.65221	-5.58383	0.00200928	0.0256423	-0.835329
ENST00000579946	-1.49555	6.3502	-5.58351	0.00200982	0.0256423	-0.835608
ENST00000422657	1.27342	8.34397	5.58299	0.00201069	0.0256423	-0.83606
DV080104	-1.25597	7.82796	-5.58132	0.00201352	0.0256423	-0.837532
NR_073082	-1.11932	9.47232	-5.57996	0.00201583	0.0256423	-0.838727
ENST00000517733	1.27154	5.93781	5.5799	0.00201592	0.0256423	-0.838776
TCONS_00023132	-1.12599	6.16285	-5.57936	0.00201684	0.0256423	-0.839252
ENST00000568354	-1.15268	5.29563	-5.57933	0.0020169	0.0256423	-0.839282
ENST00000566851	-1.75665	7.22804	-5.57714	0.0020206	0.0256626	-0.841201
ENST00000531627	-1.32395	6.31259	-5.57634	0.00202197	0.0256626	-0.841907
ENST00000438994	1.16369	5.07353	5.57606	0.00202245	0.0256626	-0.842157
NR_033387	-1.60857	5.94426	-5.57316	0.00202738	0.0257066	-0.844701
TCONS_00016316	-1.7944	6.09958	-5.57133	0.0020305	0.0257066	-0.84631
ENST00000514072	-1.29713	7.26703	-5.57043	0.00203204	0.0257066	-0.847101
ENST00000582470	-1.29425	6.0767	-5.56955	0.00203356	0.0257066	-0.847881
HMlincRNA750-	1.21193	6.70603	5.5693	0.00203397	0.0257066	-0.848096
ENST00000412431	1.97986	7.38911	5.56771	0.0020367	0.0257066	-0.849497
uc001nnk.1	1.29212	7.25777	5.56741	0.00203721	0.0257066	-0.849758
uc002lgd.1	1.22748	7.60925	5.56729	0.00203743	0.0257066	-0.849871
ENST00000562672	-1.13681	5.27183	-5.56691	0.00203807	0.0257066	-0.8502
TCONS_00020616	1.22759	6.41071	5.56629	0.00203913	0.0257066	-0.850744
TCONS_00001703	1.33795	5.79759	5.5629	0.00204497	0.0257075	-0.853734
ENST00000555299	-1.72897	6.53292	-5.56266	0.00204538	0.0257075	-0.853944
ENST00000473299	-1.3288	5.07713	-5.56219	0.0020462	0.0257075	-0.854361
NR_027430	1.1988	6.79654	5.56207	0.00204641	0.0257075	-0.854468
NR_002791	1.37819	7.52005	5.56186	0.00204677	0.0257075	-0.854653
TCONS_00016434	1.98963	7.81646	5.56086	0.0020485	0.0257075	-0.855535
ENST00000417333	1.27846	7.40036	5.5603	0.00204946	0.0257075	-0.856025
ENST00000458554	1.23356	9.19095	5.56011	0.00204978	0.0257075	-0.856189
uc003feg.3	1.24725	5.08633	5.55878	0.00205209	0.0257199	-0.857367
ENST00000584003	-1.55709	8.71539	-5.55729	0.00205467	0.0257356	-0.858678
TCONS_00020651	-1.13922	7.04639	-5.55209	0.00206369	0.0257908	-0.863263
ENST00000524253	1.18139	5.21221	5.55204	0.00206378	0.0257908	-0.863309
ENST00000426471	1.13952	8.46511	5.55156	0.00206463	0.0257908	-0.863735
ENST00000564919	-1.27351	5.29807	-5.55135	0.00206498	0.0257908	-0.863915
ENST00000434181	-1.24229	5.26058	-5.55094	0.0020657	0.0257908	-0.864281
ENST00000433576	-1.24877	7.43548	-5.54963	0.00206798	0.0258026	-0.865432
ENST00000535188	1.3865	6.90549	5.547	0.00207259	0.0258396	-0.867761
TCONS_00004172	1.12615	10.0921	5.54642	0.0020736	0.0258396	-0.868272
ENST00000539391	1.17309	5.80788	5.5425	0.00208048	0.0258823	-0.871735
ENST00000558423	-1.11161	8.45459	-5.54147	0.00208229	0.0258823	-0.872646
ENST00000420941	-1.18501	7.39979	-5.54096	0.00208318	0.0258823	-0.873094
TCONS_00014106	-1.39215	9.70391	-5.54095	0.00208319	0.0258823	-0.873099
ENST00000515071	-1.30485	6.94352	-5.5402	0.00208451	0.0258823	-0.873763
chr8:99411775-99424650+	-1.55668	7.43049	-5.53993	0.002085	0.0258823	-0.874008
ENST00000360899	1.20019	6.68166	5.53903	0.00208658	0.0258853	-0.874799
TCONS_00028585	1.10795	7.68176	5.53754	0.00208921	0.0259006	-0.876115
ENST00000434639	-1.52624	9.15992	-5.53635	0.00209132	0.0259006	-0.877171
uc021qjc.1	1.11899	11.9718	5.53607	0.00209181	0.0259006	-0.877417
ENST00000563176	-1.39973	7.83093	-5.53406	0.00209537	0.0259283	-0.879199
ENST00000558372	-1.12479	7.42706	-5.53203	0.00209897	0.0259299	-0.880994
TCONS_00029702	1.19289	7.46101	5.53178	0.00209942	0.0259299	-0.881217
ENST00000424711	1.11245	7.34034	5.53135	0.00210018	0.0259299	-0.881595
ENST00000560930	1.16707	6.10289	5.53098	0.00210084	0.0259299	-0.881923
ENST00000542435	-1.57588	7.91979	-5.52827	0.00210566	0.025956	-0.884323
ENST00000445540	-1.37424	9.3929	-5.52754	0.00210695	0.025956	-0.884965
ENST00000431650	-1.23635	7.33291	-5.5274	0.0021072	0.025956	-0.885089
ENST00000425470	-1.14232	9.08484	-5.52679	0.00210829	0.025956	-0.88563
ENST00000477059	1.20677	6.23069	5.52566	0.00211031	0.0259644	-0.886631
ENST00000424026	-1.70173	6.91626	-5.52329	0.00211455	0.0259786	-0.888733
ENST00000580056	-1.27237	8.74333	-5.52281	0.00211541	0.0259786	-0.889157
NR_024521	-1.11524	8.58576	-5.52215	0.00211661	0.0259786	-0.889749
TCONS_00013465	-1.12366	4.97471	-5.52204	0.0021168	0.0259786	-0.889845
ENST00000548875	1.14134	11.4594	5.52078	0.00211905	0.0259898	-0.890956
ENST00000472346	-1.38201	6.68983	-5.51678	0.00212625	0.026033	-0.894504
ENST00000449544	-1.1543	6.80603	-5.51678	0.00212625	0.026033	-0.894505
TCONS_00022707	1.70255	5.92317	5.51604	0.00212758	0.026033	-0.895162
NR_072998	-1.21662	5.91047	-5.51511	0.00212926	0.026033	-0.895987
ENST00000429207	1.15057	6.05992	5.51452	0.00213033	0.026033	-0.896514
TCONS_00016678	-1.11335	7.75533	-5.51437	0.00213061	0.026033	-0.896648
ENST00000565700	1.14088	6.56793	5.51154	0.00213572	0.0260704	-0.899156
ENST00000554086	-1.33581	5.82363	-5.51102	0.00213667	0.0260704	-0.899624
ENST00000366136	1.24531	6.18463	5.51046	0.00213769	0.0260704	-0.900121
NR_026734	1.30306	5.28528	5.50862	0.00214102	0.0260876	-0.901753
ENST00000455121	1.33082	8.15822	5.5081	0.00214197	0.0260876	-0.902216
ENST00000423913	-1.84904	5.34003	-5.5072	0.00214361	0.0260876	-0.903018
ENST00000504846	1.12784	5.09739	5.50673	0.00214446	0.0260876	-0.903433
ENST00000519107	-1.36202	5.23689	-5.50405	0.00214935	0.026116	-0.905818
ENST00000547009	1.59341	9.10465	5.50397	0.00214948	0.026116	-0.905881
ENST00000579693	-1.68729	9.20272	-5.50271	0.00215179	0.0261221	-0.907005
ENST00000434579	1.11367	7.29423	5.5001	0.00215657	0.0261221	-0.909326
HMlincRNA629-	-1.19747	5.54343	-5.49998	0.00215678	0.0261221	-0.909431
uc021zyp.1	-1.20858	5.12519	-5.49918	0.00215825	0.0261221	-0.910142
TCONS_00015176	-1.33363	7.31656	-5.49901	0.00215856	0.0261221	-0.910292
TCONS_00001086	1.22765	8.56286	5.498	0.00216042	0.0261221	-0.911197
ENST00000538329	-1.14997	5.1425	-5.49637	0.00216342	0.0261221	-0.912648
ENST00000416554	1.68297	7.46022	5.49577	0.00216453	0.0261221	-0.913185
ENST00000527566	-1.10075	6.71201	-5.49567	0.0021647	0.0261221	-0.913265
ENST00000445544	1.14946	5.97338	5.49527	0.00216543	0.0261221	-0.913623
ENST00000512618	1.20291	5.6475	5.49484	0.00216623	0.0261221	-0.914009
TCONS_00025553	1.09848	6.79543	5.49463	0.00216662	0.0261221	-0.914197
ENST00000563487	-1.17635	6.02167	-5.49418	0.00216744	0.0261221	-0.914594
ENST00000437831	1.17707	6.44486	5.49289	0.00216983	0.0261317	-0.915744
NR_024366	-1.09914	5.9928	-5.49198	0.0021715	0.0261317	-0.916554
ENST00000432108	1.10094	7.72082	5.49157	0.00217227	0.0261317	-0.916922
ENST00000515741	-1.32506	4.66171	-5.48699	0.00218074	0.0262061	-0.920998
TCONS_00022471	-1.18387	7.25204	-5.48678	0.00218114	0.0262061	-0.921193
ENST00000414107	-1.65647	9.50722	-5.48281	0.00218852	0.0262463	-0.924729
TCONS_00004409	-1.24778	7.14447	-5.48249	0.00218911	0.0262463	-0.925011
ENST00000448341	1.164	6.59631	5.48086	0.00219216	0.0262463	-0.926471
ENST00000507161	1.41281	6.51753	5.48052	0.0021928	0.0262463	-0.926775
ENST00000413066	1.36357	5.47492	5.48039	0.00219304	0.0262463	-0.926888
TCONS_00007321	1.19851	7.38672	5.47961	0.00219449	0.0262463	-0.927582
ENST00000425698	-1.15517	9.28305	-5.47939	0.0021949	0.0262463	-0.92778
ENST00000438148	-1.61417	9.16814	-5.47857	0.00219645	0.0262463	-0.928516
ENST00000418585	-1.15003	6.6351	-5.47813	0.00219727	0.0262463	-0.928907
TCONS_00001440	1.41815	6.7553	5.47686	0.00219964	0.0262463	-0.930037
ENST00000443445	-1.44671	7.54488	-5.47583	0.00220157	0.0262463	-0.930958
ENST00000451103	1.22083	8.00955	5.47565	0.00220191	0.0262463	-0.931118
ENST00000563019	-1.63146	5.34524	-5.47477	0.00220356	0.0262463	-0.931902
TCONS_00026647	1.16409	6.78463	5.47423	0.00220458	0.0262463	-0.932386
DA100307	-1.26332	6.10035	-5.47415	0.00220474	0.0262463	-0.932462
NR_047666	-1.32714	5.89395	-5.47278	0.00220731	0.0262546	-0.933684
TCONS_00019457	1.1629	5.16405	5.47196	0.00220885	0.0262546	-0.934413
ENST00000531585	1.17361	7.33472	5.47006	0.00221243	0.0262546	-0.936113
uc021pjm.1	-1.22284	14.3545	-5.46991	0.00221272	0.0262546	-0.936251
ENST00000428642	1.65212	5.71171	5.46974	0.00221304	0.0262546	-0.936399
ENST00000419679	-1.25218	5.17933	-5.46948	0.00221353	0.0262546	-0.936633
ENST00000470911	-1.68186	6.58439	-5.46646	0.00221924	0.0263064	-0.939333
ENST00000561915	1.14415	5.5912	5.46566	0.00222076	0.0263083	-0.94005
AF143879R	-1.23713	7.64582	-5.46346	0.00222493	0.026323	-0.942012
TCONS_00020378	-1.13749	8.05333	-5.4632	0.00222544	0.026323	-0.942253
ENST00000420169	-1.26186	6.93707	-5.46254	0.00222667	0.026323	-0.942835
ENST00000554205	1.11519	7.45122	5.46216	0.00222741	0.026323	-0.943183
ENST00000557965	1.17216	5.56217	5.46106	0.0022295	0.0263316	-0.944163
ENST00000447867	-1.42769	7.62717	-5.45944	0.00223258	0.026352	-0.94561
ENST00000551287	1.14913	6.70958	5.45788	0.00223557	0.0263713	-0.947013
ENST00000533814	-1.23698	8.20421	-5.45666	0.00223789	0.0263753	-0.948103
CD247089	-1.30849	5.6303	-5.456	0.00223916	0.0263753	-0.948693
TCONS_00024661	-1.11351	7.55378	-5.45499	0.0022411	0.0263753	-0.949603
ENST00000494676	2.28514	11.1429	5.45478	0.00224149	0.0263753	-0.949785
ENST00000501663	-1.27831	7.83949	-5.45416	0.00224268	0.0263753	-0.950343
ENST00000564680	-1.11959	7.93819	-5.45185	0.00224711	0.0263957	-0.95241
ENST00000457328	-1.41251	6.51973	-5.45184	0.00224713	0.0263957	-0.952421
TCONS_00014132	1.30305	8.07947	5.45046	0.00224979	0.0264061	-0.953661
TCONS_00007063	-1.20367	6.36889	-5.44977	0.00225112	0.0264061	-0.954277
HMlincRNA1439+	1.19125	5.49466	5.44714	0.00225619	0.0264061	-0.956635
ENST00000522339	1.49049	5.93249	5.44692	0.00225661	0.0264061	-0.95683
ENST00000529135	1.22101	6.97116	5.4465	0.00225744	0.0264061	-0.957215
TCONS_00023453	-1.1277	7.68332	-5.44621	0.00225798	0.0264061	-0.957468
TCONS_00019807	-1.12253	5.92472	-5.44608	0.00225823	0.0264061	-0.957586
ENST00000428769	1.25678	6.02701	5.44575	0.00225888	0.0264061	-0.957887
uc.38-	-1.41755	8.18487	-5.44328	0.00226366	0.0264461	-0.960103
ENST00000421601	1.20151	9.75512	5.44137	0.00226737	0.026449	-0.961817
ENST00000414548	-1.18551	7.63789	-5.44082	0.00226844	0.026449	-0.962311
ENST00000447577	-1.08901	8.19186	-5.44042	0.00226921	0.026449	-0.962667
NR_046472	-1.33191	6.69345	-5.43957	0.00227086	0.026449	-0.96343
NR_037863	1.2205	6.58745	5.43945	0.0022711	0.026449	-0.96354
TCONS_00015144	-1.59258	5.08495	-5.43895	0.00227207	0.026449	-0.963988
ENST00000434386	-1.38502	6.81527	-5.43718	0.00227551	0.0264549	-0.965577
uc001iuc.3	-1.18671	9.68203	-5.43683	0.0022762	0.0264549	-0.965892
ENST00000425554	-1.34901	6.38736	-5.4366	0.00227666	0.0264549	-0.966103
ENST00000437008	-1.14698	8.62607	-5.43465	0.00228046	0.0264789	-0.967852
ENST00000503685	1.09626	7.11771	5.43339	0.00228293	0.0264789	-0.968988
TCONS_00016675	1.09143	7.72402	5.43308	0.00228353	0.0264789	-0.969265
ENST00000578423	-1.25596	9.69542	-5.43113	0.00228735	0.0264789	-0.971017
ENST00000457106	-1.13351	6.29732	-5.43095	0.00228771	0.0264789	-0.97118
TCONS_00000815	1.30412	5.43446	5.43024	0.0022891	0.0264789	-0.97182
ENST00000425094	1.28369	10.5696	5.42993	0.00228971	0.0264789	-0.972096
TCONS_00021246	1.14627	7.46916	5.42969	0.00229017	0.0264789	-0.972309
ENST00000560967	-1.16048	6.81881	-5.42801	0.00229347	0.0264789	-0.973819
TCONS_00024761	1.13931	7.58032	5.42794	0.00229363	0.0264789	-0.97389
uc003vcr.1	1.13913	9.5696	5.4279	0.0022937	0.0264789	-0.973922
ENST00000412162	-1.15309	4.75675	-5.42701	0.00229545	0.0264834	-0.974721
uc001nvr.3	-1.13445	6.54906	-5.42631	0.00229683	0.0264836	-0.975352
ENST00000432894	-1.11741	7.53782	-5.4256	0.00229824	0.0264842	-0.975996
TCONS_00007965	-1.46804	8.34291	-5.42334	0.00230268	0.0264903	-0.978022
ENST00000400461	-1.53682	8.50054	-5.42334	0.00230269	0.0264903	-0.978028
TCONS_00025310	-1.61254	5.14679	-5.4229	0.00230357	0.0264903	-0.978425
ENST00000562555	-1.14667	8.85625	-5.42169	0.00230596	0.0264903	-0.979515
ENST00000428009	1.34316	7.47935	5.42136	0.0023066	0.0264903	-0.979805
NR_027173	1.1221	8.06094	5.4204	0.00230852	0.0264903	-0.980678
TCONS_00001392	1.11804	6.99799	5.41964	0.00231001	0.0264903	-0.981356
ENST00000539206	-1.27864	6.15493	-5.41923	0.00231082	0.0264903	-0.981723
ENST00000561432	-1.56894	6.89585	-5.41842	0.00231244	0.0264903	-0.982457
NR_023920	-1.48224	6.56287	-5.41841	0.00231246	0.0264903	-0.982465
TCONS_00019576	-1.45353	6.78212	-5.41776	0.00231375	0.0264903	-0.98305
ENST00000519329	1.27712	7.11175	5.41629	0.00231667	0.0264917	-0.984373
ENST00000560962	1.08729	7.41118	5.4159	0.00231746	0.0264917	-0.984731
ENST00000552704	-1.23863	5.41588	-5.41532	0.0023186	0.0264917	-0.98525
ENST00000553860	1.1844	9.35754	5.41496	0.00231932	0.0264917	-0.985574
ENST00000536866	-1.28564	9.17587	-5.41352	0.00232221	0.0264954	-0.986877
ENST00000411978	1.13203	7.53101	5.41344	0.00232236	0.0264954	-0.986949
NR_027700	-1.22305	11.0141	-5.41273	0.00232378	0.026496	-0.987589
uc002ohh.3	-1.44083	4.8485	-5.41194	0.00232535	0.0264983	-0.988295
ENST00000583044	1.0946	10.0165	5.41057	0.00232811	0.0265142	-0.98954
TCONS_00008555	1.12644	7.18033	5.40919	0.00233086	0.0265301	-0.990781
TCONS_00028377	1.2052	7.36603	5.40689	0.00233547	0.0265382	-0.992854
TCONS_00014870	1.28823	5.15387	5.40671	0.00233584	0.0265382	-0.99302
ENST00000427492	-1.3519	5.75981	-5.40633	0.00233661	0.0265382	-0.993366
ENST00000439804	-1.60638	7.64355	-5.40612	0.00233703	0.0265382	-0.993552
uc001gxt.3	-1.25764	10.1083	-5.40492	0.00233945	0.0265389	-0.994639
TCONS_00004358	1.26316	5.50919	5.40473	0.00233982	0.0265389	-0.994804
ENST00000580403	1.09051	4.6083	5.40297	0.00234337	0.0265637	-0.996396
ENST00000415940	1.09766	4.5454	5.40116	0.00234703	0.0265896	-0.998032
TCONS_00027578	1.09072	6.73391	5.40023	0.00234892	0.0265955	-0.998876
BX501243	1.24361	5.22515	5.39735	0.00235474	0.026646	-1.00147
uc003dyv.3	-1.29222	5.23882	-5.39531	0.00235889	0.0266775	-1.00332
ENST00000537095	-1.19951	7.5036	-5.39412	0.0023613	0.0266892	-1.00439
ENST00000578408	-1.2714	5.36135	-5.39218	0.00236525	0.0267182	-1.00615
AA879429	-1.17634	6.19926	-5.39034	0.00236902	0.0267397	-1.00782
ENST00000441142	-1.10451	5.69398	-5.38991	0.0023699	0.0267397	-1.00821
ENST00000474045	1.24829	6.35256	5.3889	0.00237196	0.0267475	-1.00912
TCONS_00027620	-1.36506	8.25938	-5.38655	0.00237676	0.0267861	-1.01124
ENST00000521965	1.41964	8.37733	5.38501	0.00237994	0.0268063	-1.01264
ENST00000430859	-1.25175	8.68956	-5.38361	0.00238281	0.0268232	-1.01391
ENST00000451152	1.16838	6.04041	5.38278	0.00238451	0.0268268	-1.01466
NR_027653	-1.52191	12.1036	-5.3821	0.00238592	0.0268271	-1.01528
ENST00000502419	-1.32729	9.38989	-5.37815	0.00239406	0.0269031	-1.01886
uc003gcy.1	1.37748	7.29107	5.37609	0.00239834	0.0269356	-1.02073
ENST00000559368	-1.58371	6.24716	-5.37454	0.00240156	0.0269562	-1.02214
ENST00000455701	-1.36426	6.04449	-5.37304	0.00240466	0.0269755	-1.02349
ENST00000529893	-1.29683	6.40693	-5.36833	0.00241448	0.0270566	-1.02777
ENST00000378368	1.37828	4.79801	5.36807	0.00241502	0.0270566	-1.02801
ENST00000503066	-1.16399	11.2038	-5.36731	0.00241661	0.0270566	-1.02869
TCONS_00018618	1.3416	6.45739	5.3669	0.00241746	0.0270566	-1.02906
NR_039976	-1.38364	6.77155	-5.36416	0.00242321	0.0271054	-1.03156
TCONS_00012029	1.2003	7.46271	5.36177	0.00242823	0.027146	-1.03374
TCONS_00008457	-1.51123	5.52996	-5.36	0.00243195	0.0271631	-1.03534
ENST00000556479	1.17643	6.5642	5.35971	0.00243256	0.0271631	-1.0356
ENST00000450848	-1.33629	4.75313	-5.35877	0.00243454	0.0271697	-1.03646
ENST00000511000	-1.42694	8.59493	-5.35769	0.00243683	0.0271796	-1.03744
NR_036487	-1.15275	9.43132	-5.35692	0.00243844	0.027182	-1.03814
ENST00000518570	1.09029	7.4159	5.35442	0.00244374	0.027223	-1.04042
TCONS_00017655	-1.7431	6.84311	-5.35364	0.00244538	0.027223	-1.04113
TCONS_00017281	-1.19753	6.58908	-5.35302	0.0024467	0.027223	-1.04169
TCONS_00024757	1.11329	7.39989	5.35254	0.00244772	0.027223	-1.04213
ENST00000554431	1.31378	4.84757	5.35035	0.00245237	0.0272235	-1.04412
ENST00000339120	-1.44991	7.10582	-5.34821	0.00245692	0.0272235	-1.04607
uc022ars.1	-1.26689	7.69984	-5.34804	0.0024573	0.0272235	-1.04623
ENST00000555460	-1.4691	6.21386	-5.34801	0.00245736	0.0272235	-1.04626
NR_037580	-1.23104	5.44617	-5.34682	0.00245988	0.0272235	-1.04733
TCONS_00011636	-1.15864	7.58874	-5.34665	0.00246026	0.0272235	-1.0475
TCONS_00008213	-1.20479	5.15863	-5.34636	0.00246087	0.0272235	-1.04776
uc003oxm.3	-1.57081	6.47837	-5.34599	0.00246166	0.0272235	-1.04809
ENST00000326333	-1.13639	8.08775	-5.34584	0.00246197	0.0272235	-1.04823
NR_038416	-1.23048	5.43588	-5.34472	0.00246437	0.0272235	-1.04925
ENST00000451090	1.23398	6.83429	5.34463	0.00246458	0.0272235	-1.04934
ENST00000552290	-1.51278	8.9765	-5.34446	0.00246492	0.0272235	-1.04949
ENST00000575126	1.26962	6.07904	5.34398	0.00246595	0.0272235	-1.04992
ENST00000430048	1.13584	7.66201	5.34039	0.00247365	0.0272929	-1.0532
ENST00000522667	-1.1048	6.45668	-5.33937	0.00247585	0.0272981	-1.05413
ENST00000434237	-1.80625	5.36612	-5.33887	0.00247692	0.0272981	-1.05459
uc009vpu.2	-1.40118	6.99336	-5.33564	0.00248389	0.0273232	-1.05754
ENST00000420951	-1.23827	7.04729	-5.33526	0.00248471	0.0273232	-1.05789
ENST00000449585	-1.17187	5.7072	-5.33439	0.00248659	0.0273232	-1.05868
ENST00000569670	-1.14797	7.48548	-5.33409	0.00248724	0.0273232	-1.05895
TCONS_00001644	-1.12831	7.6022	-5.33368	0.00248813	0.0273232	-1.05933
NR_034012	1.65133	5.47765	5.33277	0.0024901	0.0273232	-1.06016
chr14:98295825-98307425+	-1.07332	5.23232	-5.33168	0.00249245	0.0273232	-1.06115
TCONS_00010462	1.10057	7.78121	5.33092	0.00249409	0.0273232	-1.06184
TCONS_00029159	1.14297	6.09007	5.32998	0.00249614	0.0273232	-1.06271
uc003uhk.1	1.25382	7.5222	5.32946	0.00249726	0.0273232	-1.06318
ENST00000566070	1.15494	5.1049	5.32939	0.00249741	0.0273232	-1.06324
ENST00000563424	-1.18096	6.01382	-5.32928	0.00249765	0.0273232	-1.06334
ENST00000536910	1.08623	9.46677	5.32895	0.00249837	0.0273232	-1.06364
uc.159+	1.11588	7.65133	5.32872	0.00249887	0.0273232	-1.06385
TCONS_00003823	-1.12828	6.12241	-5.32707	0.00250245	0.0273397	-1.06536
ENST00000452222	1.28724	9.51153	5.32642	0.00250387	0.0273397	-1.06596
TCONS_00029032	1.09325	4.96036	5.32606	0.00250466	0.0273397	-1.06629
ENST00000442867	-1.52988	5.05734	-5.32545	0.002506	0.0273397	-1.06685
NR_024511	-1.06925	8.07735	-5.32378	0.00250964	0.0273435	-1.06837
chr10:113880000-113890875-	1.19125	6.67716	5.3231	0.00251112	0.0273435	-1.06899
ENST00000440266	-1.44024	6.1912	-5.32266	0.00251209	0.0273435	-1.0694
TCONS_00018499	1.37336	5.93043	5.32245	0.00251253	0.0273435	-1.06958
TCONS_00004325	1.1699	6.64103	5.32207	0.00251337	0.0273435	-1.06994
ENST00000560602	1.15818	5.4828	5.32002	0.00251786	0.0273704	-1.07181
chrX:137166825-137196100-	-1.24377	5.10122	-5.31965	0.00251866	0.0273704	-1.07215
TCONS_00028573	-1.24337	8.71902	-5.31858	0.00252101	0.0273774	-1.07313
ENST00000457601	1.23545	7.5027	5.31808	0.00252212	0.0273774	-1.07359
ENST00000419808	-1.43476	8.8037	-5.31429	0.00253046	0.0274526	-1.07706
NR_049786	-1.1139	5.20533	-5.31193	0.00253567	0.0274592	-1.07922
ENST00000529781	-1.1868	6.2024	-5.31187	0.00253579	0.0274592	-1.07927
TCONS_00029073	1.17911	5.56507	5.31152	0.00253658	0.0274592	-1.0796
ENST00000581905	1.13521	5.73889	5.31113	0.00253743	0.0274592	-1.07995
NR_037895	-1.23412	6.71338	-5.31082	0.00253813	0.0274592	-1.08024
NR_026929	1.14677	5.60476	5.3094	0.00254127	0.0274626	-1.08154
ENST00000572343	-1.14177	6.6503	-5.30899	0.00254217	0.0274626	-1.08191
ENST00000487814	1.31043	5.34059	5.30876	0.00254268	0.0274626	-1.08212
TCONS_00007189	1.24157	5.56974	5.30788	0.00254463	0.0274684	-1.08293
uc002nqc.3	-1.29515	5.6362	-5.30641	0.00254791	0.0274759	-1.08428
ENST00000422764	1.09537	11.8173	5.3063	0.00254814	0.0274759	-1.08438
TCONS_00010293	1.09474	5.27664	5.30544	0.00255007	0.0274814	-1.08517
NR_033712	-1.39243	8.02437	-5.30434	0.0025525	0.0274924	-1.08617
ENST00000456384	-1.10785	6.35002	-5.30069	0.00256066	0.0275562	-1.08953
TCONS_00021224	-1.4666	8.62108	-5.30042	0.00256126	0.0275562	-1.08978
ENST00000572017	1.06394	5.30987	5.29679	0.0025694	0.0276285	-1.09311
ENST00000409819	-1.19491	7.15304	-5.29521	0.00257295	0.0276474	-1.09456
NR_047515	-1.23933	10.071	-5.29474	0.002574	0.0276474	-1.09499
ENST00000548391	-1.41014	7.23377	-5.29313	0.00257762	0.0276576	-1.09647
ENST00000421759	-1.11592	6.40785	-5.29302	0.00257788	0.0276576	-1.09657
ENST00000582505	-1.14763	7.42462	-5.29213	0.00257987	0.0276576	-1.09739
NR_026668	-1.40262	8.51947	-5.29179	0.00258064	0.0276576	-1.0977
ENST00000543907	-1.76261	9.12712	-5.28976	0.00258523	0.0276674	-1.09957
ENST00000457548	1.89617	7.12474	5.2895	0.00258581	0.0276674	-1.09981
NR_045603	1.12497	5.55312	5.2895	0.00258582	0.0276674	-1.09981
TCONS_00009346	-1.10715	7.2015	-5.28801	0.00258918	0.0276882	-1.10118
ENST00000579474	-1.11232	4.84693	-5.2872	0.00259101	0.0276925	-1.10192
uc003uip.4	-1.16547	7.84814	-5.28323	0.00260004	0.0277545	-1.10558
ENST00000584614	-1.26162	7.6013	-5.28311	0.0026003	0.0277545	-1.10568
ENST00000422758	-1.07935	7.82041	-5.28276	0.00260109	0.0277545	-1.106
ENST00000443523	1.0861	5.10436	5.28184	0.00260319	0.0277617	-1.10685
uc002tzb.1	-1.10489	6.84485	-5.27867	0.00261043	0.027811	-1.10977
ENST00000576336	1.10582	7.73101	5.2777	0.00261265	0.027811	-1.11067
TCONS_00020497	1.12545	4.46248	5.27765	0.00261276	0.027811	-1.11071
NR_033850	-1.12428	6.19596	-5.2768	0.0026147	0.027811	-1.11149
TCONS_00027203	-1.12184	7.2173	-5.2759	0.00261677	0.027811	-1.11232
ENST00000426811	1.07207	4.94612	5.27584	0.00261691	0.027811	-1.11238
uc010lcy.1	1.15011	8.73255	5.27464	0.00261966	0.027811	-1.11349
uc010awi.1	1.08873	7.62216	5.27422	0.00262063	0.027811	-1.11388
ENST00000534291	-1.51794	7.38349	-5.27419	0.00262069	0.027811	-1.1139
TCONS_00004782	-1.40366	8.48918	-5.26798	0.002635	0.027924	-1.11963
ENST00000545158	1.08997	9.10879	5.2676	0.00263588	0.027924	-1.11998
ENST00000444686	-1.60611	7.07222	-5.26755	0.00263599	0.027924	-1.12002
TCONS_00023771	1.06253	5.92281	5.267	0.00263726	0.027924	-1.12053
ENST00000510536	-1.10896	5.46811	-5.26616	0.00263921	0.027924	-1.12131
uc021zad.1	-1.07122	14.8155	-5.26584	0.00263995	0.027924	-1.1216
ENST00000426991	1.29163	6.3627	5.26506	0.00264176	0.027928	-1.12232
TCONS_00017618	1.38618	8.51053	5.26342	0.00264556	0.0279468	-1.12384
TCONS_00016244	1.07904	6.04715	5.26305	0.00264641	0.0279468	-1.12417
ENST00000449573	-1.13829	5.98227	-5.26123	0.00265066	0.0279608	-1.12586
TCONS_00028434	-1.07266	9.85578	-5.25987	0.00265382	0.0279608	-1.12711
chr8:80224875-80250800-	1.14388	6.56126	5.25957	0.00265452	0.0279608	-1.12739
ENST00000566427	-1.45601	6.67627	-5.25937	0.00265498	0.0279608	-1.12757
ENST00000570309	-1.1316	6.34167	-5.25887	0.00265615	0.0279608	-1.12804
ENST00000533552	-1.1131	4.73596	-5.25878	0.00265636	0.0279608	-1.12812
ENST00000583612	-1.199	6.58534	-5.25704	0.00266042	0.0279801	-1.12973
ENST00000446115	1.08285	5.65097	5.25676	0.00266107	0.0279801	-1.12999
ENST00000451564	1.0773	6.38482	5.25414	0.00266721	0.0280192	-1.13241
ENST00000538202	-1.24937	6.69328	-5.25388	0.00266781	0.0280192	-1.13265
TCONS_00002796	-1.06952	5.2758	-5.25128	0.00267393	0.0280192	-1.13506
uc010guf.1	-1.14939	6.21412	-5.25108	0.00267439	0.0280192	-1.13524
ENST00000583609	1.16002	7.25832	5.25054	0.00267566	0.0280192	-1.13574
uc010nzo.2	-1.16016	6.20193	-5.25008	0.00267675	0.0280192	-1.13617
ENST00000440883	-1.24777	7.78447	-5.25007	0.00267677	0.0280192	-1.13618
uc002zxh.4	-1.15847	4.70889	-5.24976	0.00267748	0.0280192	-1.13646
AW769345	-1.20585	6.65417	-5.24908	0.0026791	0.0280192	-1.13709
uc001qul.3	-1.54543	8.13263	-5.24874	0.0026799	0.0280192	-1.13741
ENST00000547515	1.27807	5.42644	5.24843	0.00268064	0.0280192	-1.1377
ENST00000505546	1.30073	6.91125	5.24691	0.00268421	0.0280415	-1.1391
ENST00000558618	-1.06527	6.39606	-5.24519	0.00268828	0.0280645	-1.14069
ENST00000522197	1.24409	5.36531	5.24476	0.0026893	0.0280645	-1.14109
ENST00000436078	-1.25837	6.3938	-5.24369	0.00269183	0.0280667	-1.14208
NR_033465	-1.22931	7.45499	-5.24345	0.00269239	0.0280667	-1.1423
TCONS_00022143	1.12663	5.80458	5.24132	0.00269744	0.0280901	-1.14427
uc009vjf.2	-2.26018	6.13733	-5.24098	0.00269826	0.0280901	-1.14459
TCONS_00023478	-1.2063	6.29061	-5.24064	0.00269905	0.0280901	-1.1449
ENST00000506451	-1.06409	6.40943	-5.23993	0.00270076	0.0280901	-1.14557
TCONS_00013742	-1.40105	6.27162	-5.23946	0.00270186	0.0280901	-1.146
TCONS_00015184	1.23594	9.82266	5.23805	0.00270522	0.02811	-1.1473
ENST00000424611	1.23332	11.1065	5.23654	0.00270883	0.0281325	-1.14871
ENST00000532831	-1.33779	10.0712	-5.23392	0.00271509	0.0281824	-1.15114
NR_047682	1.18405	6.67057	5.23214	0.00271934	0.0282116	-1.15279
ENST00000558389	-1.26936	11.2205	-5.23039	0.00272354	0.0282375	-1.15441
uc009znr.1	-1.31804	5.74612	-5.22952	0.00272564	0.0282375	-1.15522
ENST00000582028	1.04716	5.31353	5.22928	0.0027262	0.0282375	-1.15544
ENST00000544419	-1.28616	5.38625	-5.22719	0.00273123	0.0282745	-1.15738
ENST00000418615	-1.18195	8.21231	-5.22567	0.0027349	0.0282975	-1.15879
ENST00000419061	1.05654	7.07694	5.22469	0.00273726	0.0283069	-1.1597
TCONS_00001294	1.31895	5.77512	5.22183	0.00274417	0.0283423	-1.16236
ENST00000436506	-1.37076	6.788	-5.22179	0.00274429	0.0283423	-1.1624
TCONS_00014231	-1.57714	5.76094	-5.22147	0.00274506	0.0283423	-1.1627
ENST00000532454	-1.13572	8.75512	-5.21825	0.00275286	0.0283969	-1.16569
ENST00000513560	-1.48367	7.27466	-5.21808	0.00275327	0.0283969	-1.16584
TCONS_00019053	-1.28766	4.84503	-5.21585	0.00275872	0.028415	-1.16792
ENST00000556634	-1.21832	5.89003	-5.21475	0.0027614	0.028415	-1.16895
uc003pgq.3	1.25391	6.63603	5.21381	0.00276369	0.028415	-1.16982
uc022avu.1	-1.05007	5.58334	-5.21329	0.00276495	0.028415	-1.1703
ENST00000561837	-1.46367	6.57418	-5.21326	0.00276503	0.028415	-1.17033
NR_034039	-1.08712	6.49145	-5.21309	0.00276545	0.028415	-1.17049
ENST00000440034	-1.17003	9.75868	-5.21292	0.00276586	0.028415	-1.17065
uc001hbp.1	-1.40156	5.31349	-5.21257	0.00276671	0.028415	-1.17097
ENST00000454517	-1.21809	8.83901	-5.21172	0.0027688	0.0284215	-1.17176
chr8:29955875-29977325-	-1.34616	7.72202	-5.20961	0.00277397	0.0284595	-1.17373
uc010vfz.1	-1.44424	6.7482	-5.2071	0.00278011	0.0285075	-1.17606
TCONS_00023483	-1.19569	6.29095	-5.20644	0.00278176	0.0285093	-1.17668
ENST00000433315	-1.28997	5.02951	-5.20462	0.00278623	0.0285235	-1.17838
TCONS_00003616	-1.29993	6.5041	-5.20461	0.00278625	0.0285235	-1.17838
TCONS_00006334	-1.1376	8.43775	-5.20405	0.00278763	0.0285235	-1.1789
TCONS_00009369	1.68875	6.44677	5.20349	0.00278901	0.0285235	-1.17942
NR_044991	-1.36427	7.58568	-5.20025	0.00279701	0.0285771	-1.18244
ENST00000458261	1.1661	6.46015	5.19965	0.00279852	0.0285771	-1.18301
ENST00000560408	-1.21296	6.3672	-5.19959	0.00279866	0.0285771	-1.18306
ENST00000570859	1.42314	5.53058	5.19816	0.0028022	0.0285823	-1.1844
TCONS_00029031	-1.18574	6.9285	-5.19656	0.00280618	0.0285823	-1.18589
DA962001	1.99452	8.43961	5.1963	0.00280684	0.0285823	-1.18614
NR_023318	-1.20686	7.21768	-5.195	0.00281005	0.0285823	-1.18734
CV326886R	1.21297	7.71353	5.19477	0.00281062	0.0285823	-1.18756
ENST00000469289	1.20574	6.72652	5.1947	0.00281081	0.0285823	-1.18763
ENST00000505408	1.15698	6.40746	5.19465	0.00281092	0.0285823	-1.18767
NR_027149	1.08214	7.05617	5.19422	0.00281199	0.0285823	-1.18807
TCONS_00026236	1.15394	7.68602	5.19407	0.00281238	0.0285823	-1.18822
ENST00000443471	1.11348	6.18761	5.19243	0.00281646	0.0286087	-1.18974
ENST00000446849	-1.14027	7.2777	-5.1909	0.00282027	0.0286249	-1.19117
NR_046572	-1.04728	6.88926	-5.19062	0.00282099	0.0286249	-1.19144
uc021qjd.1	1.1582	5.44881	5.18708	0.00282985	0.0286785	-1.19474
TCONS_00014735	1.50668	5.59088	5.18651	0.00283128	0.0286785	-1.19527
TCONS_00022028	1.30563	7.20234	5.18639	0.00283157	0.0286785	-1.19538
TCONS_00023261	1.19678	8.50347	5.18508	0.00283488	0.0286785	-1.19661
TCONS_00004741	1.36753	10.3747	5.1848	0.00283559	0.0286785	-1.19687
uc003mmk.4	1.76727	6.62709	5.18468	0.00283587	0.0286785	-1.19698
uc001onl.1	1.09104	9.35281	5.18424	0.002837	0.0286785	-1.1974
ENST00000513893	-1.14851	5.86567	-5.18381	0.00283807	0.0286785	-1.1978
NR_038915	1.17193	10.091	5.18134	0.00284431	0.0287226	-1.20011
ENST00000453953	-1.153	5.9011	-5.18091	0.00284538	0.0287226	-1.20051
ENST00000449678	-1.23209	7.09008	-5.17988	0.00284798	0.0287303	-1.20147
ENST00000499986	1.03577	6.76231	5.17889	0.00285049	0.0287303	-1.2024
uc002ecm.4	1.05052	6.63073	5.17886	0.00285058	0.0287303	-1.20243
chr6:125885000-125895925+	1.07408	7.21441	5.17709	0.00285506	0.0287472	-1.20409
TCONS_00005041	2.17034	5.61066	5.17703	0.00285521	0.0287472	-1.20414
ENST00000475362	-1.49797	7.08107	-5.17443	0.0028618	0.0287986	-1.20657
uc021phq.1	-1.57453	6.28662	-5.17371	0.00286364	0.0288022	-1.20725
ENST00000458127	-1.52845	9.178	-5.16863	0.0028766	0.0289176	-1.21201
ENST00000555413	1.28554	9.35191	5.16767	0.00287904	0.0289272	-1.2129
ENST00000425750	1.07941	6.60326	5.167	0.00288075	0.0289295	-1.21353
uc002nry.1	-1.19572	5.77274	-5.16608	0.00288313	0.0289384	-1.2144
ENST00000436598	1.06293	5.83855	5.16467	0.00288674	0.0289597	-1.21572
ENST00000526741	-1.04404	5.87403	-5.16388	0.00288876	0.028965	-1.21646
NR_024486	-1.41351	5.96498	-5.16194	0.00289377	0.0289941	-1.21828
TCONS_00013442	-1.44491	6.79399	-5.1616	0.00289464	0.0289941	-1.2186
ENST00000438017	-1.82739	7.27795	-5.16062	0.00289717	0.0290045	-1.21952
TCONS_00022077	1.75024	7.73748	5.15777	0.00290452	0.0290631	-1.22219
ENST00000331787	1.39957	8.59576	5.15698	0.00290657	0.0290686	-1.22293
ENST00000454204	-1.03725	4.64212	-5.15503	0.00291161	0.0290927	-1.22476
ENST00000560399	-1.10753	7.19492	-5.1549	0.00291196	0.0290927	-1.22489
ENST00000436779	-1.43252	8.83408	-5.15371	0.00291506	0.0291087	-1.22601
uc001hak.2	-1.3317	4.95067	-5.15084	0.00292251	0.0291681	-1.2287
ENST00000553496	-1.23096	7.39835	-5.149	0.00292731	0.029201	-1.23043
ENST00000493028	1.32234	8.94931	5.1471	0.00293225	0.0292139	-1.23221
NR_046467	-1.32756	6.6926	-5.146	0.00293514	0.0292139	-1.23325
ENST00000567714	1.09029	6.92933	5.14576	0.00293577	0.0292139	-1.23348
ENST00000457941	-1.10566	6.3342	-5.14522	0.00293719	0.0292139	-1.23399
ENST00000428614	-1.30067	4.70428	-5.14512	0.00293745	0.0292139	-1.23408
ENST00000465755	1.02852	6.41819	5.14506	0.00293761	0.0292139	-1.23414
ENST00000508752	1.04429	6.80314	5.14371	0.00294113	0.029234	-1.2354
NR_033654	-1.25498	6.62754	-5.14278	0.00294359	0.0292435	-1.23628
ENST00000442850	1.17342	9.57232	5.14188	0.00294595	0.0292519	-1.23712
TCONS_00023507	-1.13043	4.51157	-5.14093	0.00294844	0.0292604	-1.23802
ENST00000414828	1.03458	6.08308	5.13954	0.00295211	0.0292604	-1.23933
TCONS_00015529	-1.43889	5.50694	-5.13915	0.00295314	0.0292604	-1.2397
ENST00000437109	-1.17335	6.92896	-5.13867	0.0029544	0.0292604	-1.24014
ENST00000467017	1.02924	6.18308	5.13795	0.00295631	0.0292604	-1.24083
ENST00000502284	-1.32396	6.94883	-5.13774	0.00295685	0.0292604	-1.24102
ENST00000443163	1.1412	6.38214	5.13756	0.00295733	0.0292604	-1.24119
TCONS_00029886	-1.77442	8.09306	-5.1362	0.00296092	0.029281	-1.24247
ENST00000514368	-1.175	5.93097	-5.13453	0.00296535	0.0293099	-1.24405
ENST00000549261	1.04882	4.64372	5.13238	0.00297104	0.0293249	-1.24607
ENST00000570288	-1.17858	7.94128	-5.13235	0.00297112	0.0293249	-1.2461
TCONS_00022104	-1.34452	5.35335	-5.13225	0.00297139	0.0293249	-1.24619
TCONS_00005314	1.51508	8.8539	5.13046	0.00297614	0.0293523	-1.24788
ENST00000423988	-1.12462	8.25365	-5.12987	0.00297773	0.0293523	-1.24844
TCONS_00008492	1.05189	5.81569	5.1295	0.00297869	0.0293523	-1.24878
ENST00000534604	-1.2266	6.44725	-5.1281	0.00298242	0.0293742	-1.2501
NR_038400	1.14046	7.01663	5.12656	0.00298655	0.0293961	-1.25156
TCONS_00006917	1.31573	8.46734	5.12614	0.00298767	0.0293961	-1.25196
NR_015436	1.17387	4.56472	5.12557	0.00298919	0.0293962	-1.25249
uc002tfi.3	-1.19412	4.71543	-5.12408	0.00299318	0.0294127	-1.2539
ENST00000563151	-1.06199	6.99756	-5.12382	0.00299388	0.0294127	-1.25415
ENST00000558971	1.40534	10.5624	5.12254	0.0029973	0.0294313	-1.25535
ENST00000432249	-1.37245	5.70765	-5.12148	0.00300014	0.0294444	-1.25635
ENST00000441363	1.07844	8.11422	5.11791	0.00300974	0.0295237	-1.25972
TCONS_00013851	1.02743	5.06392	5.11567	0.00301579	0.0295681	-1.26184
NR_046229	-1.14823	6.605	-5.11403	0.00302022	0.0295967	-1.26339
TCONS_00004375	-1.06702	6.18376	-5.1122	0.00302519	0.0296241	-1.26512
uc011kur.2	1.55	6.86389	5.11187	0.00302607	0.0296241	-1.26543
TCONS_00016002	-1.05973	7.26521	-5.11097	0.00302851	0.0296331	-1.26628
ENST00000566245	-1.10718	6.1413	-5.1087	0.0030347	0.0296412	-1.26843
TCONS_00001394	-1.26494	5.79943	-5.10852	0.00303517	0.0296412	-1.2686
NR_033203	-1.17454	5.68199	-5.10807	0.00303639	0.0296412	-1.26902
ENST00000580595	1.22329	11.5554	5.108	0.00303658	0.0296412	-1.26909
uc010xxw.2	-1.10773	5.3604	-5.10787	0.00303695	0.0296412	-1.26922
ENST00000580948	-1.45326	7.26303	-5.10466	0.0030457	0.0296971	-1.27225
NR_033320	1.07808	5.76693	5.1043	0.00304667	0.0296971	-1.27259
uc002mim.2	-1.07533	5.94652	-5.10409	0.00304726	0.0296971	-1.2728
ENST00000542577	1.13574	6.09938	5.10248	0.00305166	0.0296999	-1.27432
ENST00000418383	-1.11309	6.88269	-5.1014	0.00305461	0.0296999	-1.27534
ENST00000423907	1.02096	7.48562	5.10123	0.00305508	0.0296999	-1.2755
[truncated: 1,329 more rows]

## Sheet: DE mRNAs
ID	logFC	AveExpr	t	P.Value	adj.P.Val	B
ARHGAP6	2.9953	9.44184	14.1787	2.93844e-05	0.0393769	3.04844
CDH22	3.3215	7.35293	13.7607	3.40629e-05	0.0393769	2.942
IL12B	3.01233	8.17733	13.6647	3.52598e-05	0.0393769	2.91677
MBL2	2.89099	7.8547	13.6345	3.56468e-05	0.0393769	2.90877
SH3RF3	-3.08718	10.9882	-12.7379	4.98272e-05	0.0393769	2.65693
NPIPL3	2.47257	12.7762	12.0003	6.67719e-05	0.0393769	2.42703
TGM1	2.49345	7.29048	11.927	6.88069e-05	0.0393769	2.40295
DBH	2.41809	7.56185	11.7716	7.3369e-05	0.0393769	2.35115
VSIG8	2.75974	7.38829	11.7688	7.34555e-05	0.0393769	2.3502
MAB21L2	2.39884	9.16389	11.763	7.36329e-05	0.0393769	2.34824
HIGD1C	2.68756	7.70188	11.6903	7.58984e-05	0.0393769	2.32364
CRLF1	2.42245	7.35273	11.6718	7.64916e-05	0.0393769	2.3173
EPHA5	2.73819	9.00447	11.6656	7.66877e-05	0.0393769	2.31522
LGI3	2.45217	10.0664	11.6452	7.7347e-05	0.0393769	2.30824
SLC24A5	2.4097	10.7862	11.6023	7.87578e-05	0.0393769	2.29348
OR8B12	2.38688	9.31502	11.4455	8.41739e-05	0.0393769	2.23891
CD300A	2.35861	7.08886	11.4238	8.49555e-05	0.0393769	2.2313
CLDN25	2.35236	6.71647	11.3933	8.60733e-05	0.0393769	2.22051
SYNE4	2.36431	7.74859	11.3075	8.93096e-05	0.0393769	2.18995
OR8H3	2.33341	7.88337	11.1644	9.50355e-05	0.0393769	2.13821
CDCA5	2.28229	11.935	11.0811	9.85684e-05	0.0393769	2.10765
USP19	-2.41309	11.7092	-10.8953	0.000107037	0.0393769	2.03816
C1orf74	2.2895	10.3208	10.8599	0.000108743	0.0393769	2.02476
SLC5A11	2.24591	7.37364	10.827	0.000110362	0.0393769	2.0122
CDHR2	2.30642	8.03517	10.696	0.000117093	0.0393769	1.96173
LCN6	2.16273	7.10476	10.631	0.000120619	0.0393769	1.93631
FNTB	2.22672	9.66797	10.5368	0.000125946	0.0393769	1.89914
ZNF318	2.1959	7.28783	10.476	0.00012954	0.0393769	1.87485
KRTAP6-2	2.16965	8.18636	10.4713	0.00012982	0.0393769	1.87298
TSEN54	2.2747	11.119	10.4398	0.000131731	0.0393769	1.86034
OR2T1	2.20083	8.90913	10.354	0.000137117	0.0393769	1.82555
OR14C36	2.15672	8.90677	10.223	0.000145848	0.0393769	1.77169
DSC3	2.38295	7.51576	10.2203	0.000146038	0.0393769	1.77055
LCE1A	2.08208	7.83386	10.1843	0.000148556	0.0393769	1.75557
DUSP16	2.21847	8.98783	10.1109	0.000153848	0.0393769	1.72482
KCTD10	2.13736	9.37515	10.0723	0.000156723	0.0393769	1.70852
RPL10L	2.27429	7.62779	10.0548	0.000158047	0.0393769	1.7011
DUOXA1	2.05535	8.36025	9.99527	0.000162658	0.0393769	1.67569
AGRP	2.08905	7.93517	9.97558	0.000164216	0.0393769	1.66725
ZFPL1	-2.70992	7.2929	-9.96696	0.000164904	0.0393769	1.66354
TBC1D3C	2.27986	8.74482	9.91836	0.000168849	0.0393769	1.64257
PRAMEF5	2.05687	7.31328	9.83762	0.000175652	0.0393769	1.60743
C20orf78	2.04712	9.3162	9.83633	0.000175763	0.0393769	1.60686
ADAMTSL2	2.13191	8.60252	9.81094	0.000177971	0.0393769	1.59573
KRTAP4-1	2.1478	7.81232	9.77736	0.000180943	0.0393769	1.58093
SCTR	2.09111	8.06466	9.77324	0.000181311	0.0393769	1.57912
COL27A1	2.21259	9.32751	9.7465	0.000183726	0.0393769	1.56728
MTHFD2	-2.46815	10.3701	-9.70556	0.000187497	0.0393769	1.54907
SPANXB1	1.98374	5.81728	9.68937	0.000189013	0.0393769	1.54184
FAM180B	1.97736	8.21827	9.68216	0.000189693	0.0393769	1.53862
LOC100132247	2.30033	13.2667	9.63295	0.000194413	0.0393769	1.51653
LOC100130301	3.54452	7.08557	9.63228	0.000194478	0.0393769	1.51622
CIC	2.01468	7.91658	9.60182	0.000197471	0.0393769	1.50247
MIA	1.98751	8.89961	9.5911	0.000198537	0.0393769	1.49761
GJA9	2.09529	6.35746	9.55358	0.000202324	0.0393769	1.48056
ANGPTL3	2.14924	7.06243	9.5486	0.000202833	0.0393769	1.47829
PPFIA4	2.09492	10.9385	9.54357	0.000203348	0.0393769	1.476
SIRPA	-2.51348	12.1612	-9.53151	0.000204591	0.0393769	1.47049
EBF3	1.997	8.48772	9.53011	0.000204736	0.0393769	1.46985
PRR21	1.95017	10.2702	9.51564	0.000206239	0.0393769	1.46323
PAG1	1.97207	5.22077	9.5098	0.000206851	0.0393769	1.46055
FA2H	1.95195	8.76595	9.50756	0.000207085	0.0393769	1.45953
DOCK3	1.9211	5.70248	9.44761	0.00021349	0.0393769	1.43192
UCN2	2.04976	7.59071	9.44027	0.00021429	0.0393769	1.42852
P2RY4	1.95312	8.67954	9.43448	0.000214925	0.0393769	1.42584
LOC100129216	2.5155	7.45463	9.42252	0.00021624	0.0393769	1.42029
KCNE4	1.98703	8.75008	9.41768	0.000216776	0.0393769	1.41804
CXCL9	1.92993	7.69233	9.39507	0.000219298	0.0393769	1.40752
FAM75A1	2.00565	7.31502	9.38749	0.000220151	0.0393769	1.40399
DIRC1	1.91209	10.7996	9.33227	0.000226487	0.0393769	1.37813
KRT2	2.03446	8.28812	9.32772	0.00022702	0.0393769	1.37599
RAD54L	1.94141	6.89319	9.3066	0.000229507	0.0393769	1.36604
ZDHHC1	2.03502	8.43458	9.27622	0.000233142	0.0393769	1.35167
PDZK1IP1	1.9216	7.97043	9.23895	0.000237695	0.0393769	1.33396
ARAP2	1.95082	6.80288	9.22251	0.000239738	0.0393769	1.32612
ZBTB8B	1.95024	6.11107	9.1748	0.000245784	0.0393769	1.30325
COL5A3	2.17055	7.68927	9.12497	0.000252293	0.0393769	1.27921
SLC25A42	1.86112	7.59208	9.12481	0.000252314	0.0393769	1.27913
SLC34A1	1.86736	8.75889	9.1149	0.000253633	0.0393769	1.27433
C12orf54	1.90345	7.42757	9.09691	0.000256049	0.0393769	1.26559
PRSS55	2.23076	6.12116	9.07017	0.000259689	0.0393769	1.25256
C19orf54	1.98099	9.48471	9.0663	0.000260221	0.0393769	1.25067
FAM168A	2.13028	9.38074	9.05288	0.000262076	0.0393769	1.24411
POM121L12	1.84003	8.30187	9.04384	0.000263333	0.0393769	1.23969
USH1G	2.07012	9.32752	9.03823	0.000264118	0.0393769	1.23694
PAX9	1.89722	7.08931	9.03287	0.000264871	0.0393769	1.2343
SPRR2F	1.96029	8.61766	9.00995	0.000268116	0.0393769	1.22304
KLHL29	1.86261	6.83422	9.00241	0.000269194	0.0393769	1.21932
SLC16A2	1.89441	7.62946	8.98659	0.000271472	0.0393769	1.21151
CASR	1.86039	8.48494	8.97203	0.000273588	0.0393769	1.20432
TSPAN33	1.82847	8.32518	8.95579	0.000275973	0.0393769	1.19627
KPRP	2.01643	8.58345	8.94788	0.000277143	0.0393769	1.19234
HHLA2	1.90495	8.23091	8.94769	0.000277171	0.0393769	1.19224
GDPD5	1.83307	8.31063	8.93858	0.000278526	0.0393769	1.18771
COL4A4	-3.15347	6.64578	-8.92406	0.000280703	0.0393769	1.18048
PNOC	1.88898	10.6549	8.91928	0.000281423	0.0393769	1.1781
KRTAP6-3	1.83036	9.25156	8.91686	0.00028179	0.0393769	1.17689
OR4F17	1.82468	7.94051	8.9135	0.000282298	0.0393769	1.17522
OR10G3	1.81257	6.55073	8.90844	0.000283067	0.0393769	1.17269
CCL3	1.85007	9.03413	8.90403	0.000283738	0.0393769	1.17048
SPACA3	1.88509	8.18685	8.84456	0.000292984	0.0393769	1.14062
SPAG8	1.99556	9.53704	8.84119	0.000293519	0.0393769	1.13892
SEMA5B	2.20911	9.2078	8.81888	0.000297086	0.0393769	1.12765
GPR152	1.85877	10.9439	8.81161	0.00029826	0.0393769	1.12396
GLRA4	2.14063	6.73615	8.78652	0.000302354	0.0393769	1.11123
ATG16L2	2.01463	6.74796	8.78272	0.00030298	0.0393769	1.10929
WDR38	1.85608	10.4069	8.7827	0.000302983	0.0393769	1.10928
HTR6	1.85518	7.63972	8.75888	0.000306941	0.0393769	1.09714
COL1A2	2.297	8.60932	8.74821	0.000308734	0.0393769	1.09169
PTGER1	2.13941	7.67114	8.74299	0.000309617	0.0393769	1.08902
KRTAP22-1	1.77893	7.37947	8.74281	0.000309647	0.0393769	1.08893
CLEC16A	1.80538	9.68484	8.71799	0.000313881	0.0393769	1.0762
CPB1	1.81586	7.10671	8.71626	0.000314177	0.0393769	1.07531
USP40	2.49807	6.59727	8.71432	0.000314513	0.0393769	1.07431
CALB2	1.85645	8.52975	8.70706	0.000315767	0.0393769	1.07058
ATP12A	1.8646	6.86088	8.6998	0.000317026	0.0393769	1.06685
BMP7	1.92373	8.50031	8.69215	0.000318361	0.0393769	1.0629
GLB1L3	1.83556	6.00106	8.68406	0.000319779	0.0393769	1.05873
FAM65C	1.8568	7.76662	8.67754	0.000320928	0.0393769	1.05536
SPEM1	2.22343	8.76694	8.66588	0.000322994	0.0393769	1.04933
LCE1D	1.79646	8.43287	8.66517	0.00032312	0.0393769	1.04897
ZNF678	1.851	7.99848	8.64505	0.000326725	0.0393769	1.03854
TRPM4	1.85077	7.98928	8.63114	0.000329244	0.0393769	1.03131
KLRC1	1.83571	6.69925	8.61479	0.000332237	0.0393769	1.02279
TFRC	2.25579	6.69047	8.61467	0.000332259	0.0393769	1.02272
ZNRD1	-2.54623	11.74	-8.61431	0.000332325	0.0393769	1.02254
WDR16	1.78697	6.31735	8.58003	0.000338704	0.0393769	1.00462
DYDC2	1.77767	6.49451	8.57345	0.000339946	0.0393769	1.00117
SYCE3	1.93785	5.82053	8.54818	0.000344762	0.0393769	0.987886
PTPRR	1.77998	12.2003	8.48812	0.00035654	0.0393769	0.956119
SHH	1.99468	7.3593	8.4714	0.000359902	0.0393769	0.947227
STK11IP	1.81879	8.93733	8.46401	0.000361402	0.0393769	0.943288
TEDDM1	1.86456	7.87729	8.45015	0.000364232	0.0393769	0.935893
KRTAP23-1	1.71544	8.18471	8.43224	0.000367928	0.0393769	0.926313
ZSCAN23	-1.7586	5.7328	-8.42133	0.000370202	0.0393769	0.920463
TSPAN1	1.79145	9.20679	8.4096	0.000372664	0.0393769	0.914168
OR6N1	1.80306	5.55383	8.40715	0.000373181	0.0393769	0.912849
FOXR1	-1.79295	5.91334	-8.38632	0.00037761	0.0393769	0.901637
RNF186	1.94231	7.55868	8.38612	0.000377654	0.0393769	0.901524
KIR3DL1	1.94302	6.38417	8.3796	0.000379054	0.0393769	0.898007
RNF144A	1.71682	9.04598	8.37848	0.000379293	0.0393769	0.897406
PAGE5	2.02911	7.92937	8.37121	0.000380863	0.0393769	0.893475
C8orf74	1.706	5.98235	8.3552	0.000384345	0.0393769	0.884813
TARM1	1.79943	9.6619	8.3445	0.000386693	0.0393769	0.879012
NANOGNB	1.69622	8.55971	8.33477	0.000388844	0.0393769	0.873728
CLMN	1.84033	8.33599	8.33197	0.000389465	0.0393769	0.872208
OCLM	1.80907	6.65081	8.3315	0.000389568	0.0393769	0.871954
CYLC1	1.96442	6.24388	8.33033	0.000389828	0.0393769	0.871318
PGLYRP4	1.90349	8.15106	8.32525	0.000390961	0.0393769	0.868551
HORMAD2	1.82031	5.68285	8.31171	0.000393996	0.0393769	0.861178
SPRR2D	2.33703	8.69773	8.30953	0.000394488	0.0393769	0.859988
IL31RA	1.71882	10.0024	8.3074	0.000394966	0.0393769	0.858831
LOC100144595	1.81745	8.94442	8.28595	0.000399846	0.0393769	0.84711
SLC22A25	1.7898	8.17811	8.28403	0.000400287	0.0393769	0.846058
KEAP1	1.69131	8.03578	8.2771	0.000401882	0.0393769	0.842259
CCK	1.77478	6.65362	8.26378	0.000404967	0.0393769	0.834952
C9orf129	1.6817	6.40774	8.25973	0.000405911	0.0393769	0.832727
NPAT	1.72938	9.53534	8.2572	0.0004065	0.0393769	0.831341
BCL7A	1.71445	6.63691	8.25037	0.000408102	0.0393769	0.827581
LPCAT4	-2.25713	5.14486	-8.24427	0.000409536	0.0393769	0.824224
TAS2R38	2.12284	6.11971	8.24008	0.000410524	0.0393769	0.821919
SGSM3	1.72256	9.00301	8.23567	0.000411569	0.0393769	0.819487
KRTAP4-11	1.7681	6.76213	8.20519	0.000418873	0.0393769	0.802644
PRKAB2	1.84046	6.68149	8.20301	0.000419403	0.0393769	0.801433
FUK	1.67796	5.76917	8.20139	0.000419795	0.0393769	0.800536
ORM2	1.79396	6.73221	8.19347	0.000421723	0.0393769	0.796146
PRKAR1B	1.79064	9.04436	8.19336	0.000421751	0.0393769	0.796082
SOX12	1.66629	10.4255	8.18664	0.000423393	0.0393769	0.792356
TMIE	1.75474	6.40151	8.1838	0.000424093	0.0393769	0.790773
TMEM74B	1.79299	7.93187	8.18219	0.000424488	0.0393769	0.78988
MLC1	1.70602	7.51557	8.17792	0.00042554	0.0393769	0.787506
ZAR1	1.66705	8.00513	8.17728	0.000425696	0.0393769	0.787153
CXorf22	2.05718	6.92785	8.17399	0.000426509	0.0393769	0.785323
KLK4	2.283	6.801	8.16056	0.000429847	0.039457	0.777843
EMILIN1	1.83867	7.5429	8.0864	0.000448847	0.0405994	0.736264
COX6A2	1.66449	6.29945	8.07888	0.00045083	0.0405994	0.732018
IL1F10	1.66201	10.6975	8.06295	0.000455062	0.0405994	0.723018
HIST1H2BK	1.67284	7.9656	8.06039	0.000455746	0.0405994	0.72157
FUT7	1.67181	6.31107	8.05383	0.000457505	0.0405994	0.717858
LOC100505478	1.80226	7.46204	8.04654	0.000459471	0.0405994	0.713723
C7orf43	1.69216	7.27453	8.03615	0.000462289	0.0405994	0.707825
TMCO2	2.77877	6.59775	8.01501	0.000468084	0.0405994	0.695802
C1orf68	1.82062	8.05963	8.0141	0.000468337	0.0405994	0.695279
CRCT1	1.74666	5.62522	8.01189	0.000468947	0.0405994	0.694023
REST	-1.68172	5.36152	-8.00718	0.000470253	0.0405994	0.691337
XRRA1	1.73062	9.90555	7.99401	0.00047393	0.0406818	0.683814
CD96	1.68485	7.75366	7.98485	0.000476504	0.0406818	0.678579
WBSCR16	1.67998	8.37983	7.95376	0.000485373	0.0406818	0.66074
SH2B2	-1.86916	10.2795	-7.95334	0.000485495	0.0406818	0.660496
BHLHE23	1.68872	7.56341	7.94814	0.000486997	0.0406818	0.657506
TMEM170B	1.62152	6.5763	7.94154	0.000488913	0.0406818	0.653704
EMR3	1.70445	7.85826	7.93539	0.000490705	0.0406818	0.65016
CNTD1	1.76545	7.36059	7.93238	0.000491584	0.0406818	0.648426
PTPN20B	1.63579	6.65745	7.92216	0.000494588	0.0407194	0.642524
GTF2A1	1.68739	8.78954	7.89572	0.000502456	0.0409239	0.627219
POU1F1	1.63794	7.35829	7.89091	0.000503903	0.0409239	0.62443
FGF7	1.89428	6.17497	7.88808	0.000504759	0.0409239	0.622783
OR2F1	1.64598	7.5135	7.87011	0.000510221	0.0410517	0.612334
B3GALT1	1.72903	6.7309	7.86602	0.000511475	0.0410517	0.60995
C11orf35	1.98642	7.95328	7.82912	0.000522946	0.0412435	0.588393
CABP4	1.6573	10.8348	7.80938	0.000529209	0.0412435	0.576806
C2orf48	1.70187	7.44775	7.80388	0.000530969	0.0412435	0.573574
MRGPRX2	1.73707	5.4973	7.80119	0.000531832	0.0412435	0.571993
APLNR	-1.86679	5.4268	-7.79215	0.000534748	0.0412435	0.566668
KRTAP5-6	1.75362	7.22122	7.77908	0.000538995	0.0412435	0.55896
LHX8	1.61314	5.67836	7.76577	0.00054336	0.0412435	0.551097
SLC47A2	1.59816	6.04482	7.76382	0.000544004	0.0412435	0.549941
NCK2	-1.92822	7.53456	-7.76195	0.00054462	0.0412435	0.548838
MYCBP2	2.37102	8.02896	7.75994	0.000545286	0.0412435	0.547647
FAM83C	1.59781	6.82475	7.74647	0.000549767	0.0412435	0.539662
OR51B5	1.60499	7.2078	7.74554	0.000550078	0.0412435	0.53911
C2CD4D	1.65729	8.26235	7.74167	0.000551373	0.0412435	0.536815
PIM2	1.74752	8.90647	7.73503	0.000553604	0.0412435	0.532873
PRSS46	1.60501	8.31277	7.7171	0.000559687	0.0412435	0.5222
MCF2L	-1.9868	6.48611	-7.7042	0.000564111	0.0412435	0.514507
C2CD3	1.56681	7.6046	7.70302	0.000564517	0.0412435	0.513804
ALPK3	1.65617	6.16348	7.70239	0.000564735	0.0412435	0.513426
CHST5	1.64707	6.26339	7.69659	0.000566742	0.0412435	0.509958
FAM22A	1.63148	11.0922	7.68216	0.000571767	0.0412435	0.501324
NCDN	1.62738	7.13447	7.6763	0.000573822	0.0412435	0.497814
FADS6	1.73265	5.17588	7.67229	0.000575235	0.0412435	0.495407
LILRA4	1.63234	8.10056	7.67082	0.000575752	0.0412435	0.494529
PLA2G4B	2.16585	7.12911	7.67058	0.000575839	0.0412435	0.49438
ZAR1L	1.56965	5.58026	7.64738	0.000584097	0.0416482	0.480438
MYADML2	-1.91647	5.01402	-7.62811	0.000591067	0.0419579	0.468813
RNF151	-2.50899	6.18464	-7.60786	0.000598495	0.0421566	0.456566
FAM19A1	1.67333	5.78897	7.6061	0.000599145	0.0421566	0.4555
OLFM1	-1.57039	4.73061	-7.58618	0.000606572	0.0423272	0.443407
TREML1	1.54962	5.67139	7.57833	0.000609527	0.0423272	0.438635
EGFL6	1.60667	5.47777	7.57589	0.000610452	0.0423272	0.437146
AGAP6	-1.64169	9.77719	-7.55927	0.000616775	0.0423272	0.42702
EFNA2	1.75131	10.7323	7.55261	0.000619335	0.0423272	0.422949
MAP1A	1.63514	5.65246	7.55238	0.000619421	0.0423272	0.422812
PRAMEF6	1.67261	6.76696	7.53821	0.000624904	0.0423272	0.414144
JPH2	1.67292	8.01557	7.53805	0.000624966	0.0423272	0.414048
OXTR	1.53271	6.66478	7.53349	0.000626743	0.0423272	0.411254
TAF8	1.60323	7.63511	7.52413	0.000630409	0.0423272	0.405516
GABRG3	1.57322	9.12462	7.51605	0.000633595	0.0423272	0.400552
BRF1	-1.53097	7.06317	-7.5153	0.000633892	0.0423272	0.400091
WNT7B	1.53457	7.18997	7.50983	0.000636059	0.0423272	0.396731
ANGPTL7	1.55165	7.13198	7.48794	0.000644823	0.0423272	0.383249
TMEM132C	1.6163	6.83843	7.48515	0.000645952	0.0423272	0.381525
PDGFD	-1.53393	7.06022	-7.48015	0.000647978	0.0423272	0.378438
SPACA4	1.63858	6.39173	7.47432	0.000650351	0.0423272	0.374834
TTC36	1.59613	6.38858	7.47029	0.000651996	0.0423272	0.372343
RPL13A	1.5859	8.21051	7.46679	0.00065343	0.0423272	0.370175
NUP153	-1.80444	6.67155	-7.46401	0.000654572	0.0423272	0.368454
HCN3	1.56992	7.18639	7.45521	0.000658199	0.0423671	0.363001
HBA1	1.98487	7.15412	7.44714	0.000661545	0.0423671	0.357997
DLL1	1.52647	8.00812	7.44214	0.00066363	0.0423671	0.354891
OR5K3	-1.75233	8.13467	-7.42776	0.000669667	0.0423671	0.345947
LY6D	1.5566	6.27694	7.42745	0.0006698	0.0423671	0.345752
KRTAP10-8	2.44896	11.4068	7.42048	0.00067275	0.0423671	0.34141
C2orf61	1.69482	6.71358	7.41811	0.000673756	0.0423671	0.339933
PCDH19	1.55722	5.60863	7.39775	0.00068248	0.0427189	0.327215
LCN8	-1.5157	6.84917	-7.38677	0.000687238	0.0427189	0.320343
CD300LF	-1.78584	4.95661	-7.3821	0.000689275	0.0427189	0.317416
INSM1	-1.99353	7.39335	-7.37965	0.000690344	0.0427189	0.315882
PSMF1	-1.64131	4.91209	-7.37423	0.000692725	0.0427189	0.312475
SHOX2	2.101	6.25877	7.36002	0.000698999	0.0428364	0.303548
ERF	-1.56508	7.02125	-7.34756	0.000704558	0.0428364	0.295702
TAS2R9	1.51572	5.96587	7.34639	0.000705084	0.0428364	0.294963
C8orf86	1.59691	8.08073	7.34015	0.000707888	0.0428364	0.291029
HOMEZ	-1.50085	6.26649	-7.33408	0.000710632	0.0428364	0.287196
CTTNBP2	1.53785	8.15371	7.33257	0.000711319	0.0428364	0.286238
SH3BP4	-1.77335	6.87165	-7.32798	0.000713403	0.0428364	0.283337
HSD11B1	1.5022	7.58959	7.32015	0.000716975	0.0428896	0.278384
ELFN1	1.50038	8.82886	7.31419	0.000719707	0.0428924	0.274613
SLFN13	1.52559	6.98586	7.30088	0.000725858	0.0429992	0.266168
SLC39A1	-1.58487	6.86875	-7.29353	0.000729278	0.0429992	0.261502
JAKMIP1	1.94538	7.14638	7.2929	0.000729575	0.0429992	0.261098
LOC100506388	1.54767	6.55134	7.27329	0.000738802	0.04305	0.248617
USH1C	-1.87211	5.70828	-7.26944	0.00074063	0.04305	0.246163
PRAP1	1.51461	5.68155	7.26833	0.000741162	0.04305	0.245449
TMEM184B	1.48004	8.02593	7.26821	0.000741219	0.04305	0.245372
KRTAP3-3	1.60524	5.16866	7.25117	0.000749381	0.0433663	0.234487
SBK2	1.54426	8.22572	7.2436	0.000753041	0.0434208	0.229642
GALNT14	1.48162	6.37625	7.21871	0.000765227	0.043829	0.213669
LIPA	1.60394	7.91395	7.21673	0.000766205	0.043829	0.212397
ITLN1	-1.60315	5.09985	-7.21	0.000769548	0.043829	0.208064
MT1G	1.55585	7.05077	7.20689	0.000771097	0.043829	0.206061
SRPK3	1.51058	9.63294	7.1818	0.000783728	0.0441894	0.189873
IFFO2	1.52327	7.8609	7.16493	0.000792365	0.0441894	0.178945
KLHL33	1.54551	7.47705	7.1648	0.00079243	0.0441894	0.178863
CD53	1.46008	8.03307	7.15666	0.000796637	0.0441894	0.173582
ZNF512	-1.48904	7.39746	-7.15627	0.000796841	0.0441894	0.173326
RLN1	1.63753	6.07532	7.15147	0.000799332	0.0441894	0.170211
CATSPERG	1.67461	7.54969	7.13684	0.000806991	0.0441894	0.160693
PRSS33	1.46526	8.08273	7.12403	0.000813762	0.0441894	0.152349
MUM1	-1.542	6.33513	-7.12132	0.000815205	0.0441894	0.15058
OCA2	1.49778	7.04301	7.1198	0.000816018	0.0441894	0.149584
NCAN	1.5219	6.90235	7.11792	0.00081702	0.0441894	0.148358
DBC1	1.57748	9.06741	7.10901	0.000821795	0.0441894	0.142535
HEATR7B2	1.49922	6.84879	7.10565	0.000823602	0.0441894	0.14034
PSG7	1.6054	8.1445	7.10333	0.000824856	0.0441894	0.138819
MYH7B	1.44695	5.48784	7.10251	0.0008253	0.0441894	0.138281
GFRAL	2.35098	8.44956	7.09547	0.000829115	0.0441894	0.133671
C2orf62	1.44467	7.2125	7.09508	0.000829327	0.0441894	0.133416
SHISA4	1.55815	8.96085	7.09278	0.000830578	0.0441894	0.131908
GPRIN3	-1.68123	6.25641	-7.09272	0.000830608	0.0441894	0.131872
KLHDC7B	1.44714	6.3006	7.08254	0.000836174	0.0441894	0.125192
EXOC3L2	-1.5965	5.36774	-7.08161	0.000836685	0.0441894	0.124582
SCN7A	1.46028	5.52299	7.07384	0.000840964	0.0441894	0.119477
EPHA6	1.63649	6.50223	7.07365	0.000841071	0.0441894	0.11935
FRRS1L	1.45983	5.89654	7.05771	0.000849935	0.0445088	0.108856
PRSS48	1.47804	6.20268	7.05154	0.000853394	0.0445438	0.104789
SLC15A5	1.49735	6.01569	7.04048	0.000859644	0.0445633	0.0974817
ATP4B	1.63212	8.52611	7.03448	0.000863053	0.0445633	0.0935155
SLC16A8	2.1885	7.85025	7.03261	0.000864122	0.0445633	0.0922757
FAM53A	1.98717	8.99258	7.03119	0.000864928	0.0445633	0.0913413
IL1R2	1.56675	5.81876	7.02335	0.00086942	0.0446507	0.0861494
SLC39A7	1.79763	9.56798	7.01114	0.000876472	0.0446773	0.07805
KCNMB2	1.76399	7.34253	6.99743	0.000884469	0.0446773	0.0689383
TFIP11	-1.57763	6.7093	-6.99298	0.000887088	0.0446773	0.0659724
NFE2L1	1.49657	7.67088	6.98707	0.000890575	0.0446773	0.062035
KRT28	1.78612	6.44819	6.98418	0.000892285	0.0446773	0.0601091
MCHR2	1.45469	5.84243	6.98214	0.000893495	0.0446773	0.0587495
ADRA1D	2.50944	7.6838	6.98092	0.000894217	0.0446773	0.0579378
HHATL	1.59856	6.4348	6.97975	0.000894911	0.0446773	0.0571589
C1QTNF1	-1.8497	6.08455	-6.97942	0.000895112	0.0446773	0.0569345
EGR2	1.42459	7.88435	6.95934	0.000907147	0.0448001	0.0435205
C1orf194	1.47689	7.17583	6.95862	0.000907585	0.0448001	0.0430351
PRSS45	1.51457	7.18901	6.95213	0.00091152	0.0448001	0.0386886
DFNB59	1.59977	6.52115	6.94882	0.000913536	0.0448001	0.0364686
C20orf195	1.54948	8.01025	6.94814	0.00091395	0.0448001	0.0360131
PLG	1.41955	7.25056	6.94736	0.000914427	0.0448001	0.0354891
C17orf51	1.53902	12.4443	6.93542	0.000921744	0.0448001	0.0274764
DOCK4	1.512	8.80161	6.93319	0.000923116	0.0448001	0.0259804
RBP2	1.60176	5.87578	6.9323	0.000923669	0.0448001	0.0253786
TPGS1	1.45081	7.79944	6.92701	0.000926936	0.0448001	0.0218275
SLC5A1	1.54438	6.059	6.92461	0.000928426	0.0448001	0.0202118
SH2D3A	1.53223	6.49571	6.91776	0.000932696	0.044862	0.0155962
ZNF783	1.43226	5.55753	6.91031	0.000937358	0.044862	0.0105786
DNAJB13	1.41316	5.28184	6.90907	0.000938137	0.044862	0.00974337
GSDMA	1.43512	12.3036	6.89859	0.000944759	0.0450439	0.00266247
EPS15	1.49429	7.36635	6.8875	0.000951817	0.0452453	-0.00483179
LAD1	1.48696	5.96232	6.86704	0.000965016	0.0457366	-0.0187076
OBSCN	1.45729	7.80375	6.85858	0.000970534	0.045862	-0.0244552
KIRREL	1.43768	7.93404	6.84932	0.000976615	0.0458747	-0.0307527
STT3A	1.48908	6.92785	6.8457	0.000979004	0.0458747	-0.033217
PROKR1	1.41925	4.81561	6.84507	0.000979419	0.0458747	-0.0336445
C19orf44	-1.60344	7.70632	-6.82579	0.000992272	0.0459996	-0.0467993
COPZ2	1.49865	12.4969	6.82324	0.000993989	0.0459996	-0.0485445
HLA-C	1.52287	10.0845	6.82287	0.000994237	0.0459996	-0.0487962
GPR26	-1.51652	7.39729	-6.82141	0.000995221	0.0459996	-0.0497952
P2RY6	-1.4534	8.31499	-6.81915	0.000996748	0.0459996	-0.0513426
PEX26	1.61492	8.3892	6.79607	0.00101248	0.0459996	-0.0671589
KIR2DL3	1.56678	6.68868	6.79018	0.00101654	0.0459996	-0.0712045
MAP6D1	-1.56912	5.15634	-6.78933	0.00101713	0.0459996	-0.0717876
MCCC2	-1.45107	6.54836	-6.78767	0.00101828	0.0459996	-0.0729272
CAD	1.46485	5.65666	6.78057	0.00102322	0.0459996	-0.0778171
TBC1D3B	-1.46307	5.8178	-6.77689	0.00102578	0.0459996	-0.080344
TM4SF18	1.38924	11.1345	6.77303	0.00102848	0.0459996	-0.0830071
APEX2	-1.38068	5.90691	-6.76357	0.00103514	0.0459996	-0.0895277
CMIP	1.39052	6.11639	6.76186	0.00103634	0.0459996	-0.0907088
DSCAML1	-1.39849	9.2407	-6.75916	0.00103826	0.0459996	-0.092572
FAM163B	1.47875	6.31878	6.7539	0.00104199	0.0459996	-0.0962065
OR4D6	-1.7422	7.86581	-6.75291	0.0010427	0.0459996	-0.0968918
DEFB116	1.78602	7.10156	6.75055	0.00104438	0.0459996	-0.0985228
SLC6A4	1.39691	4.54387	6.74663	0.00104718	0.0459996	-0.101235
PPM1E	1.39533	5.90214	6.73534	0.0010553	0.0459996	-0.109049
TRHR	1.49106	7.11995	6.73239	0.00105743	0.0459996	-0.111096
OR5C1	-1.53861	8.36486	-6.72732	0.00106111	0.0459996	-0.114613
KCNG3	1.49243	6.35909	6.72147	0.00106538	0.0459996	-0.118676
PYROXD2	-1.7725	10.5083	-6.71912	0.0010671	0.0459996	-0.120309
GNL1	-1.36555	6.23797	-6.71525	0.00106994	0.0459996	-0.123001
SLC37A1	-1.49706	6.01938	-6.71463	0.00107039	0.0459996	-0.123427
CNGA1	1.37957	5.07983	6.71438	0.00107057	0.0459996	-0.123604
FLRT2	-1.51292	5.18535	-6.70955	0.00107413	0.0459996	-0.126961
LARGE	1.50697	6.81262	6.70922	0.00107438	0.0459996	-0.127195
KCNT1	1.62434	8.79675	6.70642	0.00107644	0.0459996	-0.129142
AQP8	1.68082	6.38559	6.70508	0.00107743	0.0459996	-0.130072
CREB5	1.41447	6.88917	6.69954	0.00108154	0.0459996	-0.133934
ARG1	1.37749	7.58763	6.69896	0.00108198	0.0459996	-0.134338
EGFL8	-1.86306	6.35423	-6.69821	0.00108254	0.0459996	-0.134864
LRRC61	1.61239	8.9185	6.69239	0.00108688	0.0459996	-0.138922
CANT1	1.45561	7.93677	6.68605	0.00109163	0.0459996	-0.143344
POLR2J2	1.44416	11.7458	6.68293	0.00109398	0.0459996	-0.145529
R3HDM4	-1.53213	5.17169	-6.68265	0.00109419	0.0459996	-0.145724
UCP1	1.59866	5.52984	6.67625	0.00109903	0.0459996	-0.150195
FBXO16	-1.38986	5.90464	-6.67479	0.00110014	0.0459996	-0.151222
BRCA2	1.35911	7.43062	6.67282	0.00110164	0.0459996	-0.1526
GAPDHS	1.97436	7.11319	6.67096	0.00110305	0.0459996	-0.153897
LCE2B	2.43106	9.42993	6.66196	0.00110992	0.0461658	-0.160203
TAAR8	1.46126	9.50186	6.6528	0.00111697	0.0463384	-0.16663
CSRP2BP	-1.56021	6.0332	-6.62911	0.00113545	0.0467924	-0.183296
FAT2	-1.36042	6.33901	-6.6252	0.00113854	0.0467924	-0.186051
GPR20	-1.38856	8.97088	-6.62119	0.00114172	0.0467924	-0.188886
C20orf26	1.40861	7.36004	6.6143	0.00114719	0.0467924	-0.193749
PPAT	1.38819	5.70298	6.6134	0.00114791	0.0467924	-0.194383
SH2D1A	1.46578	6.70922	6.61103	0.0011498	0.0467924	-0.196055
RHOBTB1	1.44852	7.20845	6.61048	0.00115024	0.0467924	-0.196446
SALL3	1.36223	6.98884	6.60876	0.00115162	0.0467924	-0.197664
DTL	-1.40159	7.38821	-6.60529	0.0011544	0.0467924	-0.200119
KRT6C	1.43224	6.35827	6.60034	0.00115838	0.0467924	-0.203617
HIST3H3	1.37312	6.14823	6.59816	0.00116014	0.0467924	-0.205159
PLEKHG4B	-1.6075	4.89998	-6.59427	0.0011633	0.0468014	-0.207922
GARNL3	1.35278	7.28012	6.58502	0.00117081	0.0469833	-0.214475
KRTAP20-3	-1.52049	6.55419	-6.5815	0.0011737	0.0469833	-0.21698
LYG2	1.37262	6.70691	6.5673	0.0011854	0.0471388	-0.227072
TSNARE1	-1.48063	7.45427	-6.56469	0.00118756	0.0471388	-0.228931
SLC24A3	1.33555	8.24976	6.56308	0.0011889	0.0471388	-0.230075
RNF19B	-2.14886	5.55838	-6.56128	0.0011904	0.0471388	-0.231357
KRTAP21-2	1.41058	6.78044	6.55895	0.00119234	0.0471388	-0.23302
ACTG1	-1.49878	15.151	-6.54843	0.00120115	0.0471788	-0.240519
SFMBT2	1.38049	5.6237	6.54445	0.00120451	0.0471788	-0.243359
GPR27	1.33182	6.67192	6.54212	0.00120648	0.0471788	-0.245025
SEC24B	-1.72523	7.32632	-6.54193	0.00120664	0.0471788	-0.24516
ABCC6	-1.42577	6.24195	-6.54018	0.00120812	0.0471788	-0.246413
TAS2R60	1.47853	5.97076	6.52888	0.00121774	0.0473505	-0.254496
MC2R	2.08207	5.65616	6.52344	0.0012224	0.0473505	-0.258391
B3GNT4	1.48901	5.62461	6.52121	0.00122433	0.0473505	-0.259991
C1orf228	1.40538	5.28738	6.52115	0.00122438	0.0473505	-0.260036
TMEM63A	-1.43088	8.92455	-6.51321	0.00123123	0.0474736	-0.265728
DIRAS1	1.65803	6.45257	6.50794	0.00123581	0.0474736	-0.26951
TCL1A	1.3971	6.47296	6.50718	0.00123648	0.0474736	-0.270062
ATR	1.48899	6.7371	6.49466	0.00124743	0.047507	-0.279063
SLC52A1	1.34832	7.95075	6.49405	0.00124797	0.047507	-0.279505
LCE3C	-1.43745	7.06804	-6.4939	0.00124811	0.047507	-0.279613
DEFB121	1.32226	7.9122	6.48895	0.00125247	0.047507	-0.283173
IL1B	1.52248	7.57381	6.48723	0.00125399	0.047507	-0.284411
MUC21	1.36519	6.92539	6.48587	0.00125519	0.047507	-0.285391
BAHD1	1.39679	8.21854	6.48211	0.00125854	0.0475209	-0.288106
CCKAR	1.42569	6.37532	6.47854	0.00126171	0.0475285	-0.29068
SYCE1	1.34645	6.84293	6.47286	0.00126679	0.047533	-0.294782
CLDN12	-1.48812	6.36929	-6.46287	0.00127578	0.047533	-0.302004
HAVCR2	-2.1576	13.2636	-6.46156	0.00127697	0.047533	-0.302954
PLA2G2D	1.36143	5.77553	6.46141	0.0012771	0.047533	-0.303059
DRD5	1.44523	5.58529	6.45931	0.001279	0.047533	-0.30458
BYSL	-1.37679	7.87208	-6.45855	0.00127969	0.047533	-0.305128
GLTSCR1	-1.40112	7.03378	-6.4549	0.00128301	0.0475457	-0.307774
RBM47	-1.34503	8.36724	-6.44275	0.00129412	0.0476667	-0.316584
TEX29	1.36795	7.78963	6.44141	0.00129535	0.0476667	-0.317559
GPR157	-1.44382	7.20052	-6.43823	0.00129828	0.0476667	-0.319868
KRT76	1.31935	5.82642	6.4347	0.00130154	0.0476667	-0.322427
TIMP4	-1.42762	7.60926	-6.42914	0.0013067	0.0476667	-0.326473
KCNQ3	1.3948	6.56622	6.42565	0.00130994	0.0476667	-0.329008
SHE	-1.84094	6.0708	-6.424	0.00131148	0.0476667	-0.330214
RHBDL2	1.49748	7.66753	6.42293	0.00131248	0.0476667	-0.330989
AMELY	1.36173	8.15959	6.4157	0.00131926	0.0476667	-0.336257
SSTR4	1.30666	6.83475	6.41482	0.00132009	0.0476667	-0.336904
TFDP3	1.54058	6.48709	6.41057	0.00132409	0.0476667	-0.340001
RASGRF2	1.30398	7.94472	6.40944	0.00132515	0.0476667	-0.340821
DOK5	-1.85274	5.03922	-6.40897	0.0013256	0.0476667	-0.341166
XPNPEP2	1.75714	7.63991	6.40022	0.0013339	0.0476667	-0.347554
ATAD5	1.35827	9.27786	6.38442	0.00134905	0.0476667	-0.359117
ANGPT4	1.31629	6.55494	6.38245	0.00135096	0.0476667	-0.36056
PSKH2	-1.41548	5.51755	-6.38243	0.00135098	0.0476667	-0.360575
C14orf43	-1.3896	5.59994	-6.382	0.00135139	0.0476667	-0.360887
USP22	-1.44324	6.10648	-6.3808	0.00135255	0.0476667	-0.361766
CDCA2	1.36009	6.5874	6.38016	0.00135317	0.0476667	-0.362234
FERMT1	1.31405	6.81604	6.37933	0.00135397	0.0476667	-0.362845
OR10A2	1.36612	6.59165	6.37707	0.00135616	0.0476667	-0.364499
KEL	1.40566	7.24684	6.37612	0.00135709	0.0476667	-0.365197
SCUBE3	1.35725	5.3665	6.37405	0.0013591	0.0476667	-0.366717
KIAA0146	-1.43	6.35238	-6.36947	0.00136357	0.0476667	-0.370079
ZNF512B	1.36225	5.70256	6.36917	0.00136387	0.0476667	-0.370301
ZNF683	1.51414	7.12659	6.36268	0.00137023	0.0477094	-0.375069
BSDC1	-1.45121	6.98555	-6.35579	0.00137702	0.0477094	-0.380135
SYT2	1.41697	6.69882	6.35499	0.00137781	0.0477094	-0.380724
RIPK4	-1.38386	6.19166	-6.354	0.00137879	0.0477094	-0.381451
KCND2	1.29462	6.76272	6.34583	0.00138691	0.0477094	-0.387472
NTN5	1.31173	5.27656	6.34452	0.00138822	0.0477094	-0.388436
OR4K1	1.29644	6.75375	6.34219	0.00139054	0.0477094	-0.390151
KIF19	1.31023	6.04643	6.34206	0.00139068	0.0477094	-0.390252
ARID3C	-1.40665	7.11643	-6.33811	0.00139464	0.0477094	-0.393167
ZNF653	-1.39114	8.55612	-6.33612	0.00139663	0.0477094	-0.394634
ZMYND15	1.29395	5.70818	6.33024	0.00140255	0.0477094	-0.398974
AKD1	1.31725	6.76304	6.32868	0.00140413	0.0477094	-0.400129
CD83	1.37515	7.36921	6.32437	0.00140851	0.0477094	-0.403316
CSAG3	1.43494	5.72258	6.32029	0.00141266	0.0477094	-0.406335
LOC100128071	1.28788	9.37696	6.31669	0.00141633	0.0477094	-0.408998
LARP1	-1.41161	6.83363	-6.3119	0.00142123	0.0477094	-0.412548
DEFB4A	-1.34862	8.30352	-6.31006	0.00142312	0.0477094	-0.413908
C5orf60	1.41784	6.84222	6.30673	0.00142654	0.0477094	-0.416375
ZFP36	1.31434	7.4797	6.30589	0.00142741	0.0477094	-0.417
ZSCAN5A	-1.40104	4.99494	-6.30428	0.00142908	0.0477094	-0.418196
KIAA1191	-1.29935	8.19405	-6.30252	0.0014309	0.0477094	-0.419503
B3GAT1	1.28519	5.54309	6.29463	0.00143908	0.0477094	-0.42536
MIP	1.48925	6.66615	6.2936	0.00144016	0.0477094	-0.426124
KRTAP10-6	1.33291	7.39986	6.29332	0.00144045	0.0477094	-0.426335
MT1B	1.49767	10.0247	6.28989	0.00144402	0.0477094	-0.428879
ABLIM3	1.43147	7.62104	6.28971	0.00144422	0.0477094	-0.429018
PAQR6	1.38425	6.91204	6.28826	0.00144574	0.0477094	-0.430099
PROX2	1.47806	6.80903	6.2803	0.0014541	0.0478583	-0.436022
MTSS1L	-1.44418	8.46095	-6.27827	0.00145624	0.0478583	-0.437535
KCNN1	1.44176	6.26826	6.2754	0.00145928	0.0478595	-0.439673
AMHR2	1.88904	7.77257	6.26889	0.00146618	0.0478965	-0.444523
POLM	1.60532	7.82967	6.26858	0.00146651	0.0478965	-0.444755
PARP10	1.34582	6.98637	6.26587	0.0014694	0.0478965	-0.446776
DDR2	1.32483	6.59024	6.26188	0.00147367	0.0479378	-0.449757
CCDC62	1.52694	5.78541	6.25874	0.00147704	0.0479498	-0.452107
GPIHBP1	1.38067	7.97852	6.24344	0.00149357	0.048388	-0.463549
DLL4	1.30919	4.99374	6.24035	0.00149694	0.0483989	-0.465864
SCRT1	1.46134	6.49311	6.23542	0.00150233	0.0484751	-0.469562
PHF8	-1.30787	7.79953	-6.22373	0.0015152	0.0487122	-0.478343
C2orf18	1.32056	6.84937	6.22321	0.00151577	0.0487122	-0.47873
ALDH1A2	-1.31266	5.1037	-6.22045	0.00151884	0.0487125	-0.480806
NPM3	1.30822	5.60314	6.20579	0.0015352	0.0490982	-0.49184
SOX3	1.49943	5.19778	6.20419	0.00153701	0.0490982	-0.493049
LAMA5	1.28101	7.01168	6.19578	0.00154651	0.0492276	-0.499393
HOMER2	1.4564	5.63975	6.19509	0.00154728	0.0492276	-0.499908
CCDC54	1.58753	5.33627	6.1903	0.00155273	0.0492276	-0.50353
KCNV2	1.35146	6.94006	6.18946	0.00155368	0.0492276	-0.504161
CYP2C8	1.33639	7.10092	6.18674	0.00155679	0.0492276	-0.506218
SLC5A12	1.36997	7.09398	6.18432	0.00155955	0.0492276	-0.508047
SEMA3D	1.41364	7.26598	6.18039	0.00156406	0.0492724	-0.511018
MYO1D	-1.55219	6.50952	-6.17513	0.00157012	0.049366	-0.515005
CSN2	1.3452	7.32087	6.15817	0.00158983	0.0498875	-0.527863
CEACAM3	-1.49394	4.95483	-6.15504	0.00159351	0.0499048	-0.530245
TMEM209	1.26058	6.78127	6.1396	0.00161175	0.0502357	-0.541985
LAMP1	-2.08938	8.14	-6.13343	0.00161911	0.0502357	-0.546687
SSPO	1.25069	9.89742	6.13325	0.00161933	0.0502357	-0.546829
MED20	-1.25408	6.97215	-6.13312	0.00161948	0.0502357	-0.546922
CLEC10A	1.26083	8.04885	6.13286	0.0016198	0.0502357	-0.547125
OR5A1	1.61181	6.11319	6.12655	0.00162737	0.050243	-0.551937
LOC646862	-1.30724	4.95228	-6.11267	0.00164418	0.050243	-0.562545
TBATA	1.26099	6.5074	6.1114	0.00164572	0.050243	-0.563514
RTP2	-1.29296	6.50676	-6.10988	0.00164758	0.050243	-0.564681
CPNE9	1.29533	5.28374	6.10947	0.00164807	0.050243	-0.564989
ARPP21	-1.31008	5.68369	-6.10799	0.00164989	0.050243	-0.566123
MRC1	1.33957	8.18502	6.10709	0.00165099	0.050243	-0.566812
MDGA1	-1.41238	7.65816	-6.10006	0.00165961	0.050243	-0.572194
CDC20B	1.64088	8.87542	6.09979	0.00165995	0.050243	-0.572406
C1QTNF2	-1.421	5.10383	-6.09879	0.00166118	0.050243	-0.573168
APP	-1.54583	12.5361	-6.09697	0.00166343	0.050243	-0.574566
COBLL1	1.2475	7.09239	6.09571	0.00166499	0.050243	-0.575536
PTPN20A	1.74322	5.10177	6.0953	0.00166549	0.050243	-0.575846
TAC1	-1.30775	4.89924	-6.09371	0.00166746	0.050243	-0.577065
TMEM151B	-1.7931	6.34441	-6.08868	0.00167371	0.050243	-0.580929
PRSS50	-1.50795	5.38409	-6.08807	0.00167446	0.050243	-0.581395
AQP3	-1.39491	5.0879	-6.08735	0.00167537	0.050243	-0.581953
KIAA0913	1.29793	8.95996	6.08631	0.00167665	0.050243	-0.582746
OR6V1	-1.24143	5.21345	-6.07687	0.00168847	0.0504506	-0.590005
C22orf31	1.45439	5.94137	6.07551	0.00169019	0.0504506	-0.591054
CHRM4	-1.32949	6.53302	-6.07029	0.00169677	0.0504506	-0.595071
IL34	1.4516	7.2073	6.06987	0.0016973	0.0504506	-0.595394
ZNF560	1.38477	6.35419	6.06823	0.00169938	0.0504506	-0.596658
MIDN	-1.34971	5.38789	-6.0652	0.00170321	0.0504706	-0.598989
TMEM86A	-1.33849	6.39943	-6.05624	0.00171464	0.0507006	-0.605904
CDK3	-1.43429	8.19236	-6.05145	0.00172078	0.0507006	-0.609603
GIMAP5	-1.46593	7.07099	-6.05007	0.00172255	0.0507006	-0.610666
NDST2	1.25211	7.46639	6.04715	0.00172632	0.0507006	-0.612924
ILDR2	1.42061	8.617	6.04674	0.00172684	0.0507006	-0.613238
KIAA0513	1.3289	7.55676	6.04349	0.00173104	0.0507307	-0.615753
ADCY3	-1.34333	6.2369	-6.03955	0.00173615	0.0507872	-0.618801
ASB18	1.45935	7.74099	6.03188	0.00174615	0.0509524	-0.624742
FKBP5	1.23176	6.45087	6.02815	0.00175103	0.0509524	-0.62763
ABCA4	-1.23986	5.31178	-6.0278	0.00175149	0.0509524	-0.6279
EIF3CL	-1.73572	9.65184	-6.02252	0.00175844	0.0509524	-0.632002
ZNF718	1.24213	7.90985	6.02226	0.00175878	0.0509524	-0.632201
DAPK1	-1.38903	7.92609	-6.02062	0.00176094	0.0509524	-0.633473
COL15A1	1.3543	5.67113	6.01724	0.00176541	0.0509792	-0.636099
TBL1Y	2.21779	8.00627	6.00961	0.00177555	0.0509792	-0.642027
PIEZO1	2.30015	9.02657	6.0089	0.0017765	0.0509792	-0.642578
C17orf107	1.28701	6.50805	6.0082	0.00177743	0.0509792	-0.643124
HAND1	-1.23634	7.58906	-6.00791	0.00177783	0.0509792	-0.643354
SOAT2	1.26359	7.41074	5.99846	0.0017905	0.0510057	-0.650711
YEATS2	-1.57437	6.66312	-5.99635	0.00179333	0.0510057	-0.652349
WFIKKN2	1.35948	7.36994	5.99572	0.00179418	0.0510057	-0.65284
CCDC90B	1.48237	13.5577	5.99464	0.00179565	0.0510057	-0.653686
OR51E1	2.31575	11.3863	5.99163	0.00179971	0.0510057	-0.656028
PUS3	1.57068	10.2015	5.99033	0.00180148	0.0510057	-0.657044
SEC31B	-1.35335	6.87361	-5.98792	0.00180475	0.0510057	-0.658925
DDHD1	1.34967	8.11775	5.98729	0.00180561	0.0510057	-0.65942
UNC5A	1.46344	7.28013	5.98467	0.00180917	0.0510057	-0.66146
ACHE	1.41967	9.19356	5.98293	0.00181155	0.0510057	-0.662819
GPR63	1.46931	6.89878	5.97393	0.00182389	0.0510057	-0.669858
AARS	-1.54923	6.0938	-5.97317	0.00182493	0.0510057	-0.67045
GPR98	1.21826	6.47403	5.97308	0.00182505	0.0510057	-0.670516
FAM25C	1.42568	9.00135	5.97235	0.00182606	0.0510057	-0.67109
FAM69B	-1.29063	8.80342	-5.97192	0.00182665	0.0510057	-0.671425
TNP2	1.22232	7.62647	5.9628	0.00183928	0.0511941	-0.678566
HSF4	1.29626	9.55221	5.96242	0.00183981	0.0511941	-0.678866
DUXA	1.52132	6.60295	5.95979	0.00184347	0.0512067	-0.680926
UCMA	1.50847	5.22944	5.95613	0.00184858	0.0512596	-0.683798
XRCC2	-1.57827	8.03363	-5.95367	0.00185202	0.0512659	-0.685725
C4orf19	1.24698	5.29185	5.94905	0.0018585	0.0513162	-0.689352
PLD5	-1.50292	5.17941	-5.94526	0.00186385	0.0513162	-0.69233
CCT8	1.74782	9.15005	5.94382	0.00186587	0.0513162	-0.693458
CBY3	1.28209	5.14387	5.94076	0.00187022	0.0513162	-0.695869
HOXC5	-1.34712	7.28698	-5.93935	0.00187222	0.0513162	-0.696979
RASSF4	-1.32079	7.59143	-5.93738	0.00187502	0.0513162	-0.698528
NXPH4	-1.26029	6.68245	-5.93588	0.00187714	0.0513162	-0.699704
LRRC55	-1.69586	5.36793	-5.93221	0.00188238	0.0513162	-0.702594
EMX1	1.71131	8.08319	5.93035	0.00188504	0.0513162	-0.704062
FAM19A5	-1.46939	6.82827	-5.9297	0.00188596	0.0513162	-0.704571
EVPL	1.39427	6.92202	5.92611	0.0018911	0.0513686	-0.707395
HSP90AB1	-1.59017	10.616	-5.91353	0.00190927	0.0516338	-0.717322
TCERG1	1.45456	8.01344	5.9119	0.00191164	0.0516338	-0.718611
SLAMF8	1.22986	5.9486	5.91182	0.00191177	0.0516338	-0.718677
GRM1	1.2548	6.01494	5.9077	0.00191776	0.0516338	-0.721929
EMID1	1.4776	6.61518	5.89736	0.00193293	0.0516338	-0.730111
OR9Q2	1.51283	7.49346	5.89046	0.00194313	0.0516338	-0.735581
C20orf27	-1.32119	7.50365	-5.88981	0.00194408	0.0516338	-0.736089
COL8A2	1.29401	6.77373	5.88816	0.00194653	0.0516338	-0.737398
NPAS2	-1.22025	7.31523	-5.88643	0.00194911	0.0516338	-0.738772
NPR1	-1.70883	4.79316	-5.88627	0.00194935	0.0516338	-0.738903
CCDC160	1.204	5.80389	5.88172	0.00195613	0.0516338	-0.742509
ZCCHC13	-1.30303	5.45492	-5.87882	0.00196047	0.0516338	-0.744812
ENTHD2	-1.38005	4.90194	-5.87844	0.00196104	0.0516338	-0.745116
ADH1C	1.25744	6.23974	5.87831	0.00196124	0.0516338	-0.745217
C2orf83	-1.30085	4.99757	-5.87808	0.00196158	0.0516338	-0.745399
NR4A1	1.30481	6.24606	5.87464	0.00196674	0.0516338	-0.748132
KIAA0100	-1.3714	6.28645	-5.87351	0.00196845	0.0516338	-0.749031
IER2	-1.29503	8.70505	-5.87131	0.00197176	0.0516338	-0.750779
USP11	1.24063	6.00695	5.86982	0.00197401	0.0516338	-0.751964
THNSL2	1.24824	8.66284	5.869	0.00197524	0.0516338	-0.752615
ZNF624	1.28369	6.65917	5.86774	0.00197715	0.0516338	-0.753616
CLEC4A	1.2059	6.40582	5.8632	0.00198403	0.0516338	-0.757231
LAT2	1.38227	6.05252	5.86115	0.00198715	0.0516338	-0.758866
C17orf85	-1.34806	6.3448	-5.8584	0.00199134	0.0516338	-0.761052
GUCY2D	-1.31468	6.38475	-5.8539	0.00199822	0.0516338	-0.764639
CELA2B	-1.29642	5.02839	-5.85299	0.00199961	0.0516338	-0.765365
GRM6	-1.32266	4.60053	-5.84984	0.00200446	0.0516338	-0.767885
LILRB3	1.26796	5.3784	5.84882	0.00200602	0.0516338	-0.768692
CSHL1	-1.4673	6.57162	-5.84781	0.00200757	0.0516338	-0.769498
BPIFB3	1.32667	6.27579	5.84718	0.00200855	0.0516338	-0.770004
RHBG	1.22475	8.64271	5.84043	0.00201899	0.0516338	-0.775398
FSTL3	-1.26625	9.52233	-5.84012	0.00201946	0.0516338	-0.775639
TNFRSF6B	-1.22554	5.7801	-5.83894	0.0020213	0.0516338	-0.776587
NKX2-4	-1.38513	6.57541	-5.83748	0.00202357	0.0516338	-0.777756
NSUN7	-1.58962	8.42138	-5.83647	0.00202514	0.0516338	-0.778561
SNRNP200	-1.36678	5.01467	-5.83407	0.00202887	0.0516338	-0.780478
KRTAP17-1	1.22116	5.19768	5.83376	0.00202936	0.0516338	-0.780727
EVI5	-1.29916	5.758	-5.83306	0.00203046	0.0516338	-0.781291
GATC	1.58855	7.43725	5.82998	0.00203527	0.0516338	-0.783756
LY6G6D	-1.20841	5.3806	-5.82871	0.00203725	0.0516338	-0.784767
C10orf122	-1.25942	7.29757	-5.82798	0.0020384	0.0516338	-0.785356
HNRPLL	-1.29668	6.30177	-5.82657	0.00204061	0.0516338	-0.786482
ZBTB37	1.54501	5.47133	5.82549	0.00204231	0.0516338	-0.787349
HCN2	1.27778	5.73558	5.82498	0.00204311	0.0516338	-0.787756
MYO1G	1.22531	6.65568	5.82271	0.00204668	0.0516423	-0.789574
PLXNB1	1.2486	10.5203	5.81902	0.00205251	0.0517077	-0.792534
PTPRT	1.19868	7.1309	5.81195	0.00206372	0.0519083	-0.798207
KAL1	1.20657	5.38856	5.80968	0.00206733	0.0519173	-0.800027
OR2T11	1.3784	4.6472	5.80357	0.0020771	0.0520021	-0.804935
MTMR11	1.21748	10.344	5.8035	0.00207722	0.0520021	-0.804994
DSG3	1.26532	6.06469	5.79712	0.00208747	0.0521265	-0.810122
TNIP2	-1.51836	7.00014	-5.79423	0.00209215	0.0521265	-0.812453
SLC39A14	1.20608	7.82331	5.79266	0.00209468	0.0521265	-0.813715
C2orf91	1.17806	5.88702	5.79036	0.00209841	0.0521265	-0.815569
MPP4	1.18885	9.72806	5.79029	0.00209852	0.0521265	-0.815624
MARK2	-1.23518	7.22284	-5.78641	0.00210482	0.0521265	-0.818746
ACADL	-1.19048	4.85103	-5.78628	0.00210503	0.0521265	-0.818852
HDLBP	-2.46666	6.89615	-5.78053	0.00211443	0.052243	-0.823494
C8B	-1.38388	8.52813	-5.77776	0.00211898	0.052243	-0.82573
KRTAP6-1	2.59328	10.106	5.77563	0.00212246	0.052243	-0.827444
RAPSN	1.18788	4.77825	5.77425	0.00212473	0.052243	-0.828558
OSBP2	1.18105	6.176	5.77088	0.00213029	0.052243	-0.83128
LRRC25	1.25528	6.67349	5.76876	0.00213381	0.052243	-0.833
ZGLP1	1.31236	6.8187	5.76812	0.00213486	0.052243	-0.833516
CD1A	1.38868	8.02059	5.76749	0.00213591	0.052243	-0.834026
C2CD2L	-1.24284	6.27527	-5.76204	0.00214496	0.0522995	-0.838434
NFKBID	1.3157	9.13186	5.76022	0.00214798	0.0522995	-0.839903
PSORS1C2	1.17362	7.40288	5.75799	0.00215171	0.0522995	-0.84171
KDM1B	-1.22866	11.2715	-5.75439	0.00215772	0.0522995	-0.844623
KRT4	1.98842	9.28316	5.75126	0.00216298	0.0522995	-0.84716
P4HB	-1.56297	11.1541	-5.7512	0.00216309	0.0522995	-0.847211
C16orf70	-1.26946	9.07186	-5.75066	0.00216399	0.0522995	-0.847646
MC1R	-1.19677	5.68237	-5.74921	0.00216644	0.0522995	-0.848828
LPAR4	1.28909	6.10305	5.74847	0.00216768	0.0522995	-0.849425
FTSJ3	-1.41059	5.85034	-5.74427	0.00217477	0.0523674	-0.85283
KDM5D	-1.42062	5.12181	-5.74199	0.00217865	0.0523674	-0.854687
PRMT10	-1.27886	5.73094	-5.7377	0.00218593	0.0523674	-0.858171
RCOR1	1.17351	7.01629	5.73663	0.00218775	0.0523674	-0.859038
HMGXB3	-1.24173	6.90821	-5.73146	0.00219658	0.0523674	-0.86324
PAX5	1.42989	7.29574	5.73146	0.00219659	0.0523674	-0.863243
TARS2	-1.17248	6.09855	-5.731	0.00219736	0.0523674	-0.863612
PLXNB2	-1.17573	6.54048	-5.72888	0.002201	0.0523674	-0.865338
SWSAP1	1.48123	8.32942	5.72631	0.00220542	0.0523674	-0.867432
IL12RB2	1.3305	7.17394	5.72451	0.00220851	0.0523674	-0.868895
WFDC5	-1.28791	5.77727	-5.72285	0.00221138	0.0523674	-0.87025
JOSD2	-1.59298	7.54981	-5.72202	0.00221282	0.0523674	-0.870926
KRTAP2-2	1.17375	6.75386	5.71776	0.00222019	0.0523674	-0.874397
PNCK	1.59724	6.22744	5.71719	0.00222117	0.0523674	-0.874859
AHDC1	-1.46309	7.94211	-5.71669	0.00222203	0.0523674	-0.875262
CTRL	2.07644	7.98243	5.71616	0.00222296	0.0523674	-0.875699
ZNF667	1.3914	5.84298	5.71169	0.00223073	0.0523844	-0.879343
KRT32	-1.16069	6.6482	-5.70799	0.0022372	0.0523844	-0.882365
LCE3E	1.17978	6.33868	5.70651	0.00223979	0.0523844	-0.883573
PBOV1	1.16075	4.65362	5.70407	0.00224405	0.0523844	-0.88556
CYP2W1	1.17282	6.99057	5.70264	0.00224658	0.0523844	-0.886734
C19orf38	2.09657	9.40095	5.7009	0.00224964	0.0523844	-0.888155
KLB	-1.25196	6.11407	-5.69651	0.00225737	0.0523844	-0.891742
GAS6	-1.33519	7.99877	-5.68908	0.00227055	0.0523844	-0.89782
GPR31	1.23486	4.95615	5.68822	0.00227209	0.0523844	-0.89853
CDKN1A	-1.7491	8.85838	-5.68787	0.00227271	0.0523844	-0.898814
IQCF1	1.17568	5.02928	5.68541	0.00227709	0.0523844	-0.900827
WNT2B	1.7241	14.1072	5.68324	0.00228097	0.0523844	-0.902606
TTC7B	-1.44131	7.14348	-5.68196	0.00228326	0.0523844	-0.903654
CEP164	1.19994	8.07305	5.68128	0.00228449	0.0523844	-0.904213
FGD5	-1.35497	8.17156	-5.67928	0.00228808	0.0523844	-0.905858
KRTAP4-6	1.17812	6.05847	5.67832	0.00228981	0.0523844	-0.906644
CYP2F1	1.26202	4.97162	5.6763	0.00229343	0.0523844	-0.908297
CACNA1S	1.40984	6.81804	5.67607	0.00229384	0.0523844	-0.908484
CCDC155	1.22851	7.04649	5.67518	0.00229545	0.0523844	-0.909215
GABRA5	-1.49895	8.15332	-5.67504	0.0022957	0.0523844	-0.909331
GTF2F1	-1.16375	7.40072	-5.67219	0.00230085	0.0523844	-0.911672
PTCD1	-1.56421	5.49771	-5.67092	0.00230315	0.0523844	-0.912717
HIST1H3A	1.47351	7.28351	5.67083	0.00230332	0.0523844	-0.912793
SART1	-1.75008	6.74387	-5.67077	0.00230343	0.0523844	-0.912843
SLFN11	1.23765	7.04394	5.66953	0.00230567	0.0523844	-0.913861
UGT1A9	1.40674	8.03033	5.66589	0.00231227	0.0524595	-0.916845
CHI3L2	1.15721	6.26258	5.65948	0.00232396	0.0526007	-0.92212
NAPG	-1.17336	5.51385	-5.65763	0.00232734	0.0526007	-0.92364
C13orf35	1.23381	5.72926	5.65707	0.00232837	0.0526007	-0.9241
BICC1	1.19043	5.61883	5.65422	0.0023336	0.0526444	-0.926446
MTRNR2L3	1.23601	12.8365	5.64536	0.00234996	0.0529009	-0.93375
CETN1	1.26621	5.71198	5.64154	0.00235705	0.0529009	-0.936902
KLF1	1.24662	5.25716	5.64114	0.00235779	0.0529009	-0.937232
SHISA3	-1.46632	5.8723	-5.64066	0.00235868	0.0529009	-0.937626
SLC25A41	-1.21441	5.79033	-5.63894	0.00236189	0.0529009	-0.939048
DEFB108B	1.18562	5.18566	5.63523	0.00236882	0.0529009	-0.942114
USP50	1.44117	5.265	5.6347	0.00236981	0.0529009	-0.942549
C2	1.32181	6.5856	5.6253	0.00238747	0.0529009	-0.950318
CPED1	1.15211	6.46255	5.62474	0.00238853	0.0529009	-0.950781
NKX2-8	1.20312	7.3363	5.62258	0.00239261	0.0529009	-0.952566
ILK	-1.38104	7.63557	-5.62034	0.00239686	0.0529009	-0.954427
TESK1	-1.49115	5.20354	-5.61925	0.00239892	0.0529009	-0.955324
IRX4	-1.65036	6.45417	-5.61685	0.00240348	0.0529009	-0.957312
COX4I2	1.15003	6.21175	5.61533	0.00240639	0.0529009	-0.958577
SPDEF	1.17222	5.21244	5.61515	0.00240673	0.0529009	-0.958725
KIAA0408	1.73401	5.47031	5.61469	0.0024076	0.0529009	-0.959104
SAP18	1.20994	5.71698	5.6145	0.00240796	0.0529009	-0.959259
KRT71	-1.72929	13.3934	-5.61311	0.00241062	0.0529009	-0.960415
FAM19A3	-1.19015	7.46763	-5.61088	0.00241487	0.0529009	-0.962262
TKTL1	1.22542	8.1211	5.60918	0.00241814	0.0529009	-0.963676
LRP12	1.24077	5.60135	5.60451	0.00242709	0.0529009	-0.967545
MAGEC3	1.56079	8.60868	5.60395	0.00242819	0.0529009	-0.968017
ANG	1.14002	8.2136	5.60336	0.00242931	0.0529009	-0.9685
DIXDC1	1.14749	7.92095	5.60181	0.00243231	0.0529009	-0.969794
REG3A	-1.26337	7.58788	-5.60148	0.00243294	0.0529009	-0.970063
RNH1	-1.3638	8.90024	-5.6009	0.00243407	0.0529009	-0.97055
CCL13	1.43563	7.94789	5.60073	0.0024344	0.0529009	-0.970691
PLRG1	-1.51107	6.42032	-5.59835	0.00243899	0.0529288	-0.972667
CD99L2	-1.48542	5.78047	-5.59257	0.0024502	0.0530526	-0.977466
CPA4	-1.16015	7.13249	-5.59199	0.00245134	0.0530526	-0.977954
XRCC1	-1.21358	6.16459	-5.58832	0.00245848	0.0531352	-0.981002
FBXL14	-1.28216	12.1858	-5.58379	0.00246737	0.0531868	-0.984781
H1FNT	1.22486	7.6157	5.58311	0.00246869	0.0531868	-0.98534
INA	1.51317	10.286	5.57973	0.00247534	0.0531868	-0.988158
KCNK10	1.17313	6.70946	5.57716	0.00248042	0.0531868	-0.990306
SNX20	1.42117	6.66589	5.57531	0.00248406	0.0531868	-0.991844
TNNC1	-1.20337	7.21158	-5.57529	0.00248411	0.0531868	-0.991865
SLC35C1	-1.27882	5.95202	-5.57525	0.00248418	0.0531868	-0.991894
KIAA1045	-1.17716	6.78529	-5.57294	0.00248875	0.0532133	-0.99382
KCNE2	1.73149	6.297	5.56578	0.002503	0.0534464	-0.999801
DHX34	1.36267	6.421	5.55707	0.00252045	0.0536396	-1.00708
CASC3	-1.91282	6.62759	-5.55657	0.00252145	0.0536396	-1.0075
LRRC8A	-1.30243	5.80643	-5.55624	0.00252212	0.0536396	-1.00778
SPRR2A	1.24166	7.25683	5.55279	0.00252907	0.0536412	-1.01066
OR2AG1	1.28174	6.38368	5.55261	0.00252944	0.0536412	-1.01082
OMP	1.17413	5.90206	5.54882	0.00253711	0.0536412	-1.01399
GIGYF1	1.20696	5.29999	5.54837	0.00253802	0.0536412	-1.01437
FXR2	-1.64668	6.12286	-5.54691	0.00254097	0.0536412	-1.01558
IRF3	-1.31388	7.04585	-5.54595	0.00254293	0.0536412	-1.01639
CST4	1.63468	5.94237	5.54336	0.00254821	0.0536412	-1.01857
ZNF442	-1.23538	5.86957	-5.54202	0.00255093	0.0536412	-1.01969
SGSM1	1.18883	8.41534	5.54129	0.00255242	0.0536412	-1.0203
NME6	-1.2314	5.34938	-5.53723	0.00256072	0.0537021	-1.0237
PRSS36	-1.91394	4.97952	-5.53479	0.00256573	0.0537021	-1.02575
CEP57	-1.32183	7.21169	-5.53388	0.0025676	0.0537021	-1.02652
VN1R2	1.32256	6.56459	5.53303	0.00256934	0.0537021	-1.02723
CCDC74B	-1.17366	9.31299	-5.53014	0.00257529	0.0537021	-1.02965
CLEC2L	1.1619	5.56554	5.52931	0.00257701	0.0537021	-1.03035
CLCN4	-1.12524	6.5976	-5.52713	0.00258152	0.0537021	-1.03219
TMEM86B	1.46097	8.85208	5.52662	0.00258258	0.0537021	-1.03262
SPRR1B	1.26957	6.68907	5.52517	0.00258558	0.0537021	-1.03384
SGTA	-1.36102	6.65058	-5.52058	0.00259511	0.05383	-1.0377
PRPF38B	-1.1245	7.21762	-5.51488	0.002607	0.0539127	-1.04249
AQP2	-1.1525	5.6	-5.51379	0.00260929	0.0539127	-1.04341
C7orf66	1.2994	7.24877	5.51084	0.00261548	0.0539127	-1.0459
OR8B2	1.44575	7.71501	5.50946	0.00261837	0.0539127	-1.04706
TMEM72	-1.2227	6.22003	-5.50916	0.002619	0.0539127	-1.04731
CRAT	-1.43039	6.47714	-5.50726	0.00262301	0.0539127	-1.04891
SPNS3	1.56279	11.0928	5.50329	0.00263141	0.0539127	-1.05227
RETNLB	1.16774	8.12952	5.50277	0.0026325	0.0539127	-1.0527
CCDC168	-1.26521	5.27533	-5.50031	0.00263771	0.0539127	-1.05478
VAT1	-2.86059	6.83797	-5.49927	0.00263991	0.0539127	-1.05566
ZNF837	-1.1316	6.66995	-5.49782	0.002643	0.0539127	-1.05688
HCAR2	1.23953	8.76515	5.49654	0.00264571	0.0539127	-1.05796
ADAM29	-1.32134	9.32262	-5.496	0.00264687	0.0539127	-1.05842
FTSJD2	-1.60449	5.00468	-5.49372	0.00265173	0.0539127	-1.06035
ARHGEF12	1.21921	6.32789	5.49353	0.00265214	0.0539127	-1.06051
C4orf36	1.15554	5.53149	5.49308	0.0026531	0.0539127	-1.06089
TNFAIP8L3	1.60662	6.65075	5.48951	0.00266073	0.0539708	-1.0639
NLRP7	1.36193	6.6974	5.48859	0.00266272	0.0539708	-1.06469
AVIL	1.23605	5.38982	5.48682	0.00266652	0.0539793	-1.06619
MAST2	1.16099	6.79677	5.47893	0.00268353	0.0541961	-1.07286
ESPN	-1.16615	5.53988	-5.47871	0.00268401	0.0541961	-1.07305
BSND	1.25773	7.58356	5.47696	0.00268779	0.0542039	-1.07453
FAM72A	1.26812	8.5609	5.47353	0.00269526	0.0542293	-1.07744
HEATR2	-1.41942	6.58321	-5.47297	0.00269647	0.0542293	-1.07791
CYP4F22	1.16743	6.31339	5.4717	0.00269924	0.0542293	-1.07899
MMP16	1.14874	7.29263	5.46753	0.00270835	0.0542977	-1.08253
KRT73	1.72762	10.4578	5.46703	0.00270945	0.0542977	-1.08296
SPATA16	-1.18332	5.4596	-5.46494	0.00271402	0.0543212	-1.08473
SPON2	1.13873	7.26955	5.46258	0.0027192	0.0543568	-1.08673
VAMP1	1.17441	8.28868	5.46023	0.00272437	0.0543921	-1.08873
HIP1	-1.47233	5.26976	-5.45391	0.00273834	0.0545875	-1.0941
PTAFR	1.17648	7.06631	5.45271	0.002741	0.0545875	-1.09512
CXXC1	-1.47696	6.68249	-5.44138	0.00276628	0.0550053	-1.10477
KIAA0319	1.19766	5.23129	5.44023	0.00276886	0.0550053	-1.10575
THOC5	-1.16425	6.61093	-5.43169	0.00278811	0.0551406	-1.11303
TRIM47	1.13861	8.35173	5.42999	0.00279197	0.0551406	-1.11449
GFOD1	-1.52168	7.26436	-5.42506	0.00280317	0.0551406	-1.1187
CHST1	-1.37763	8.09028	-5.42324	0.00280732	0.0551406	-1.12026
WBP1L	1.32868	10.5973	5.42068	0.00281318	0.0551406	-1.12245
SAG	-1.34015	5.23803	-5.42055	0.00281347	0.0551406	-1.12256
ANGEL2	-1.37708	7.30046	-5.42036	0.00281391	0.0551406	-1.12272
LOC158434	-1.11158	7.50402	-5.41974	0.00281533	0.0551406	-1.12325
FMO1	1.14159	4.96856	5.41923	0.00281649	0.0551406	-1.12368
CTNNA1	-1.56161	11.2628	-5.41883	0.00281741	0.0551406	-1.12403
DHX37	1.50436	5.87861	5.41831	0.00281861	0.0551406	-1.12447
ACAP1	-1.20464	6.15026	-5.4179	0.00281954	0.0551406	-1.12482
CYGB	1.20355	7.52172	5.41746	0.00282055	0.0551406	-1.1252
GPR88	1.89606	9.84843	5.415	0.0028262	0.0551835	-1.12731
ZFP36L1	-1.13699	6.71645	-5.40759	0.0028433	0.0553756	-1.13365
NTN4	1.38194	9.5394	5.40437	0.00285078	0.0553756	-1.13641
LHX9	1.13859	5.93036	5.40393	0.00285181	0.0553756	-1.13679
ACSL6	-1.22566	8.86588	-5.40272	0.00285462	0.0553756	-1.13783
FPGT-TNNI3K	1.17128	5.91675	5.40153	0.00285737	0.0553756	-1.13884
LBX1	1.11577	5.49123	5.40041	0.00286	0.0553756	-1.13981
MTRNR2L7	1.18068	13.7056	5.39727	0.00286732	0.0553756	-1.1425
TTLL12	-1.45451	6.70251	-5.39565	0.00287113	0.0553756	-1.1439
HSD11B2	-1.22457	8.29723	-5.39547	0.00287154	0.0553756	-1.14405
ITGAM	1.19051	7.00934	5.39451	0.0028738	0.0553756	-1.14488
SH3PXD2A	-1.52542	8.34016	-5.39345	0.00287627	0.0553756	-1.14578
TTC22	-1.56895	5.37755	-5.39287	0.00287765	0.0553756	-1.14628
KLHDC8A	1.18485	4.61926	5.38841	0.00288814	0.0555041	-1.15011
PRLH	-1.47552	7.88654	-5.38708	0.00289128	0.0555041	-1.15126
STON2	-1.44265	6.76345	-5.38151	0.00290449	0.0556411	-1.15605
FOXP3	-1.33511	7.4641	-5.37976	0.00290864	0.0556411	-1.15756
PIP5K1C	-1.09747	6.1647	-5.37854	0.00291153	0.0556411	-1.1586
WDR1	-1.4017	11.0459	-5.37771	0.00291351	0.0556411	-1.15932
LOC100287482	1.20129	8.21094	5.37568	0.00291836	0.0556411	-1.16107
LPAR1	-1.27943	7.06095	-5.37528	0.00291931	0.0556411	-1.16141
ODF3	1.38039	9.40557	5.37229	0.00292647	0.0556523	-1.16399
ABHD12B	-1.19077	6.18053	-5.37213	0.00292687	0.0556523	-1.16413
RINL	-1.22323	5.68019	-5.36834	0.00293594	0.0557585	-1.16739
VCY	1.45472	5.1859	5.36587	0.00294189	0.0557865	-1.16953
DNAAF2	-1.17562	5.9987	-5.36483	0.00294441	0.0557865	-1.17043
GPR18	1.09757	5.41436	5.35955	0.00295719	0.0558605	-1.17499
ACSM1	1.16516	5.7808	5.35929	0.00295782	0.0558605	-1.17521
SOX7	-1.37162	7.18796	-5.35888	0.0029588	0.0558605	-1.17556
OR9G1	1.18385	8.69415	5.35632	0.00296503	0.0558731	-1.17778
PIK3C2B	1.14172	6.45975	5.35463	0.00296913	0.0558731	-1.17923
TM9SF4	-1.13545	6.90951	-5.35331	0.00297236	0.0558731	-1.18038
SLC26A11	-1.42264	5.54771	-5.35143	0.00297695	0.0558731	-1.182
VSTM2L	1.18998	8.27311	5.35101	0.00297798	0.0558731	-1.18237
USP26	-1.28186	4.85367	-5.34981	0.00298092	0.0558731	-1.18341
IL23R	1.10861	4.72194	5.34741	0.0029868	0.0558731	-1.18548
HMG20A	1.09739	9.60774	5.34516	0.00299231	0.0558731	-1.18743
NGF	1.12399	5.73983	5.34433	0.00299436	0.0558731	-1.18815
UNC93A	1.13166	8.0435	5.34313	0.00299733	0.0558731	-1.18919
DAZ3	1.164	8.65194	5.34179	0.00300063	0.0558731	-1.19035
ZNF285	-1.14908	5.96908	-5.34081	0.00300303	0.0558731	-1.19119
POU2F3	1.16075	6.14808	5.34004	0.00300495	0.0558731	-1.19186
MAGEA9B	1.39284	6.01811	5.33756	0.00301107	0.0559219	-1.19401
DSCR4	1.22432	4.86034	5.33411	0.00301964	0.0559465	-1.197
TNRC18	-1.26945	5.27716	-5.33407	0.00301975	0.0559465	-1.19704
SMO	1.24509	5.43261	5.33245	0.00302378	0.0559465	-1.19845
FLNB	-2.67815	7.52755	-5.33133	0.00302655	0.0559465	-1.19941
PABPC1	-1.83794	8.59929	-5.3288	0.00303287	0.0559465	-1.20161
DLK2	1.21781	8.71287	5.32858	0.00303341	0.0559465	-1.2018
MUL1	-1.40048	6.67695	-5.325	0.00304239	0.0559533	-1.20491
RND2	-1.12466	7.32966	-5.32319	0.00304694	0.0559533	-1.20649
ANKRD34A	-1.11575	5.98378	-5.32258	0.00304846	0.0559533	-1.20702
TMEM249	-1.09942	6.1892	-5.32205	0.00304978	0.0559533	-1.20747
PAEP	1.51521	9.89782	5.32023	0.00305437	0.0559533	-1.20906
PABPC3	-1.6536	7.90143	-5.31997	0.00305502	0.0559533	-1.20928
MYEOV2	2.04994	9.15151	5.31867	0.0030583	0.0559533	-1.21041
ZCCHC8	-1.28346	6.31141	-5.31637	0.00306411	0.0559542	-1.21241
EMR1	1.11973	4.8588	5.31571	0.00306579	0.0559542	-1.21299
PMPCA	-1.34364	8.92875	-5.31219	0.00307472	0.0559542	-1.21605
C3orf72	-1.22823	7.24573	-5.30961	0.00308126	0.0559542	-1.2183
PATL2	-1.68858	5.6171	-5.30878	0.00308337	0.0559542	-1.21902
PASK	-1.41114	6.43762	-5.30795	0.00308549	0.0559542	-1.21974
CFC1	1.71796	5.82834	5.30777	0.00308594	0.0559542	-1.2199
BTBD18	-1.11169	8.85067	-5.30745	0.00308677	0.0559542	-1.22018
SLC1A7	1.40222	8.76944	5.30247	0.00309948	0.0559542	-1.22451
NOLC1	-1.61579	8.5153	-5.30233	0.00309985	0.0559542	-1.22464
OPN1MW2	1.3143	6.11007	5.30098	0.00310331	0.0559542	-1.22582
CHMP1A	-1.94035	6.75906	-5.2998	0.00310636	0.0559542	-1.22685
LEUTX	-1.27825	7.40304	-5.2993	0.00310764	0.0559542	-1.22729
C8orf31	-1.25775	7.35789	-5.29916	0.00310798	0.0559542	-1.2274
OLFM2	1.09886	6.48884	5.29803	0.0031109	0.0559542	-1.22839
CRISPLD2	-1.33758	6.05841	-5.29016	0.00313123	0.0562564	-1.23526
KRTDAP	-1.26149	6.24684	-5.28645	0.00314087	0.0563262	-1.2385
OR4D2	1.15142	6.76624	5.28559	0.00314309	0.0563262	-1.23925
RDH5	-1.52426	7.27639	-5.2846	0.00314569	0.0563262	-1.24012
PGS1	-1.44919	6.47342	-5.28057	0.0031562	0.0564226	-1.24364
FAM109B	-1.0902	7.19298	-5.27983	0.00315814	0.0564226	-1.24429
NAT9	-1.45729	7.24165	-5.27784	0.00316336	0.0564527	-1.24603
TMEM196	1.38842	4.94019	5.27396	0.00317357	0.0565325	-1.24943
LSAMP	1.14678	4.60231	5.27345	0.00317491	0.0565325	-1.24988
N4BP2	1.51068	5.0055	5.27092	0.0031816	0.0565885	-1.2521
SCO2	1.50706	9.82155	5.26689	0.00319225	0.0566767	-1.25563
ZNF843	-1.19122	5.58009	-5.26636	0.00319365	0.0566767	-1.25609
BRPF1	-1.91865	6.23352	-5.2593	0.00321247	0.0569329	-1.26229
ADNP	1.2359	6.79487	5.25757	0.0032171	0.0569329	-1.26381
TGM7	1.23181	5.16629	5.25666	0.00321952	0.0569329	-1.2646
ST6GAL2	1.09713	10.6017	5.25479	0.00322455	0.0569329	-1.26625
FER1L6	1.18071	6.58446	5.25428	0.00322591	0.0569329	-1.2667
SKIV2L	-1.28495	6.97239	-5.24935	0.00323918	0.0570848	-1.27103
MUS81	-1.77571	5.70396	-5.24843	0.00324167	0.0570848	-1.27184
KLF8	1.27148	6.05209	5.24292	0.00325659	0.057194	-1.27669
CYP4A22	-1.36401	5.54496	-5.24288	0.00325669	0.057194	-1.27672
FARP2	1.5899	9.11997	5.24217	0.00325861	0.057194	-1.27735
KCTD12	-1.28793	5.90572	-5.23604	0.00327531	0.0573726	-1.28274
TRIM46	1.29917	6.18571	5.2358	0.00327597	0.0573726	-1.28296
SPDYE5	1.07069	6.23209	5.234	0.00328092	0.0573962	-1.28455
PIPOX	1.13138	5.48245	5.2296	0.00329298	0.0575442	-1.28843
CRB1	-1.11426	6.82627	-5.22396	0.00330854	0.0576981	-1.29341
UNK	-1.66779	6.75083	-5.22315	0.00331078	0.0576981	-1.29412
ZKSCAN1	-1.42135	9.92425	-5.22248	0.00331262	0.0576981	-1.29471
PTH2	1.26573	7.73251	5.22117	0.00331625	0.0576983	-1.29586
IPO9	-1.56481	7.61314	-5.21665	0.00332881	0.057854	-1.29986
SLC22A31	-1.17168	6.47205	-5.21303	0.00333893	0.0579667	-1.30307
PAQR5	1.06161	6.88745	5.20812	0.00335269	0.0581003	-1.30741
YOD1	1.2223	6.91114	5.20769	0.0033539	0.0581003	-1.30779
WDR46	-1.08539	8.13546	-5.20575	0.00335936	0.0581318	-1.30951
LOC650293	1.27477	6.60895	5.20362	0.00336536	0.0581322	-1.3114
RSAD1	-1.13669	7.34434	-5.20315	0.00336666	0.0581322	-1.31181
GDF7	-1.11493	5.3242	-5.20023	0.00337492	0.0582119	-1.3144
ZNF337	-1.28601	5.98283	-5.19861	0.00337952	0.0582283	-1.31584
LOC283710	-1.19912	5.56343	-5.19588	0.00338726	0.0582988	-1.31825
MLF2	-1.0688	7.0238	-5.19449	0.00339123	0.0583044	-1.31949
IL6R	1.23151	6.75615	5.19119	0.00340063	0.0584031	-1.32242
ZNF99	1.21793	5.37168	5.18848	0.00340838	0.0584374	-1.32482
C19orf21	1.48211	7.19543	5.18793	0.00340995	0.0584374	-1.32531
ARMC5	1.07873	8.56343	5.18432	0.00342033	0.0585524	-1.32852
ZNF750	3.6368	7.46693	5.18255	0.0034254	0.0585536	-1.33009
RBM14	-1.2473	9.06116	-5.18175	0.00342772	0.0585536	-1.33081
UBD	1.98038	7.7868	5.17877	0.00343631	0.0586376	-1.33345
S100A5	-1.5337	8.52517	-5.17685	0.00344188	0.05867	-1.33517
COLEC10	1.19285	5.55187	5.17481	0.00344779	0.0587079	-1.33698
AXL	1.0876	9.22426	5.16813	0.00346724	0.0589181	-1.34293
GIMAP1	-1.23631	8.64456	-5.16784	0.00346807	0.0589181	-1.34318
BCL2L1	-1.06868	5.98349	-5.16604	0.00347336	0.0589181	-1.34479
ADAD1	-1.26289	7.61686	-5.16551	0.00347488	0.0589181	-1.34526
CHRM5	1.29563	5.88139	5.16267	0.00348324	0.0589972	-1.3478
LCE1C	2.37882	8.49633	5.15835	0.00349594	0.0590247	-1.35165
KRTAP11-1	1.08464	5.32336	5.15623	0.00350221	0.0590247	-1.35354
PRKG2	1.51056	6.74839	5.1562	0.0035023	0.0590247	-1.35357
CLK3	-1.22918	7.71706	-5.155	0.00350585	0.0590247	-1.35464
LANCL1	-1.04975	6.56042	-5.15425	0.00350805	0.0590247	-1.35531
SLC45A3	-1.1283	7.31577	-5.15297	0.00351186	0.0590247	-1.35645
FATE1	-1.09562	7.24017	-5.15266	0.00351276	0.0590247	-1.35673
CTSB	-1.61215	8.36349	-5.1521	0.00351443	0.0590247	-1.35723
FGF11	-1.35832	8.36374	-5.14717	0.0035291	0.0591487	-1.36164
CSNK1E	-1.07875	7.33914	-5.14713	0.00352922	0.0591487	-1.36167
SPANXN5	-1.19953	6.47145	-5.14431	0.00353762	0.0592061	-1.36419
TMEM131	-1.40868	6.50458	-5.1435	0.00354006	0.0592061	-1.36492
DNAJC11	-1.09335	7.49017	-5.13782	0.00355712	0.0593574	-1.37001
ADAM32	-1.46614	5.61247	-5.13554	0.00356397	0.0593574	-1.37204
CHRNB2	-1.1472	5.38453	-5.13441	0.00356739	0.0593574	-1.37306
PLA2G12B	1.199	5.34038	5.13436	0.00356754	0.0593574	-1.3731
GTSF1L	1.09188	5.6587	5.1321	0.00357438	0.0593574	-1.37513
IFI16	-1.92918	10.108	-5.13056	0.00357905	0.0593574	-1.37651
KL	1.49507	5.78364	5.12982	0.00358127	0.0593574	-1.37717
TCTN2	1.54737	7.93569	5.12946	0.00358237	0.0593574	-1.37749
MUC6	1.15326	7.11555	5.1294	0.00358255	0.0593574	-1.37755
PSMD3	-1.37143	8.56957	-5.12703	0.00358975	0.059415	-1.37967
CASZ1	1.25916	6.604	5.12476	0.00359666	0.0594677	-1.38171
KRT31	1.09079	5.53917	5.12231	0.00360416	0.0595302	-1.38391
ALPK2	1.08292	6.12545	5.12022	0.00361054	0.0595739	-1.38578
FNBP1L	-1.07406	4.78272	-5.11889	0.00361463	0.0595799	-1.38698
WDFY1	-1.12169	6.2851	-5.11487	0.00362697	0.0597096	-1.39059
ZNF324B	-1.3557	8.88857	-5.1139	0.00362998	0.0597096	-1.39147
SLC1A6	1.26322	6.913	5.10638	0.00365321	0.0600045	-1.39823
SF3B3	-2.50228	5.65317	-5.10567	0.00365542	0.0600045	-1.39887
SDPR	-1.9056	9.71177	-5.10033	0.00367206	0.0601263	-1.40367
MALL	-1.46582	6.65444	-5.1001	0.00367279	0.0601263	-1.40389
ACR	1.59688	5.4783	5.09856	0.00367761	0.0601263	-1.40527
POMC	-1.0379	6.65738	-5.09847	0.0036779	0.0601263	-1.40536
CD82	-1.19208	8.05513	-5.09724	0.00368174	0.0601276	-1.40646
PARP16	-1.18568	9.27196	-5.09398	0.00369196	0.0602329	-1.4094
GPR62	1.49596	5.89497	5.09079	0.00370201	0.0603351	-1.41228
WFDC9	-1.31628	6.82264	-5.08468	0.00372134	0.0604798	-1.4178
MYH14	1.22159	9.13185	5.08386	0.00372393	0.0604798	-1.41853
FAM157A	-1.04866	6.46437	-5.08359	0.00372478	0.0604798	-1.41878
UPK1B	1.19821	4.58835	5.0832	0.00372603	0.0604798	-1.41913
CYP7B1	-1.36393	7.25245	-5.07954	0.00373769	0.0606076	-1.42244
COL16A1	-1.16512	5.9536	-5.07552	0.00375052	0.0606291	-1.42607
GLTPD1	-1.29318	5.85178	-5.07424	0.00375464	0.0606291	-1.42724
AZU1	-1.57503	7.07433	-5.0718	0.00376247	0.0606291	-1.42944
RTN4RL2	-1.46918	8.24716	-5.07147	0.00376353	0.0606291	-1.42974
CCDC94	-1.06832	6.9818	-5.07145	0.0037636	0.0606291	-1.42976
SPICE1	-1.38923	7.4557	-5.07012	0.00376787	0.0606291	-1.43096
MAGED2	-1.0829	8.44449	-5.06967	0.00376931	0.0606291	-1.43137
KCTD6	-1.15326	6.25779	-5.06965	0.00376939	0.0606291	-1.43139
EFNB2	-1.57358	5.17665	-5.06841	0.00377336	0.0606319	-1.43251
ABCA8	1.07895	4.80112	5.06197	0.00379421	0.0609056	-1.43835
AK8	-1.1101	6.59284	-5.05433	0.00381911	0.0611384	-1.44528
C12orf50	-2.14081	6.38309	-5.05408	0.0038199	0.0611384	-1.4455
CCNK	1.14449	10.4099	5.05335	0.00382232	0.0611384	-1.44617
MFN2	-1.10467	7.85109	-5.05181	0.00382734	0.0611384	-1.44756
CPSF7	1.11366	6.95575	5.05166	0.00382785	0.0611384	-1.4477
LDOC1L	-1.3713	6.05358	-5.04534	0.00384862	0.0614088	-1.45344
GPR114	-1.13968	5.14446	-5.0414	0.00386165	0.0615202	-1.45703
EFTUD2	-1.92595	7.64398	-5.0409	0.00386331	0.0615202	-1.45748
MAP3K14	-1.97746	5.71109	-5.03928	0.00386866	0.0615441	-1.45895
MYBL2	-1.03104	5.26458	-5.03578	0.00388031	0.061668	-1.46214
NPAP1	-1.3187	9.0932	-5.03395	0.00388643	0.0617038	-1.46381
KIF4B	1.16943	8.89388	5.0319	0.00389327	0.0617132	-1.46568
GPR149	1.03358	5.17896	5.02996	0.00389975	0.0617132	-1.46744
FSTL4	1.11788	6.97741	5.0294	0.00390166	0.0617132	-1.46796
GK2	-1.23128	4.8734	-5.02881	0.00390363	0.0617132	-1.46849
CRKL	-1.60618	9.21591	-5.028	0.00390634	0.0617132	-1.46923
SLC9A3R1	-1.17539	6.42849	-5.02446	0.00391825	0.0618401	-1.47246
DCAF16	-1.03529	8.30937	-5.02196	0.00392667	0.061912	-1.47474
SSTR5	1.17989	10.7522	5.01931	0.00393565	0.061966	-1.47716
SCGB1D2	1.08259	7.24154	5.01866	0.00393786	0.061966	-1.47776
C5orf65	-1.30346	6.83916	-5.01675	0.00394433	0.0620067	-1.4795
RNF222	1.0923	5.97234	5.0147	0.00395128	0.0620549	-1.48136
ANXA6	-1.66273	7.98351	-5.01302	0.00395701	0.0620838	-1.4829
THAP8	-1.19768	6.55855	-5.00686	0.00397807	0.0623163	-1.48853
ABHD8	-1.41301	4.8692	-5.0063	0.00398001	0.0623163	-1.48905
GPX3	1.05419	8.20714	5.00467	0.00398558	0.0623163	-1.49053
TNXB	-1.1023	8.57078	-5.00293	0.00399158	0.0623163	-1.49213
CDH7	1.25968	5.65599	5.00201	0.00399474	0.0623163	-1.49297
SPATA25	1.28311	6.09411	5.00187	0.00399524	0.0623163	-1.4931
ARL2BP	-1.02482	9.91172	-4.99828	0.00400762	0.0623231	-1.49639
C16orf86	1.38126	8.13967	4.99663	0.00401334	0.0623231	-1.4979
UCK1	-1.22869	6.67984	-4.99387	0.00402292	0.0623231	-1.50043
MED13L	1.25141	6.11928	4.9928	0.00402662	0.0623231	-1.50141
TRAF3IP1	-1.10817	6.90658	-4.99266	0.00402711	0.0623231	-1.50154
PAQR4	-1.43699	7.83132	-4.99233	0.00402828	0.0623231	-1.50185
CLK2	-1.10333	7.1688	-4.99173	0.00403036	0.0623231	-1.50239
ARHGEF40	1.07699	8.9091	4.99074	0.00403381	0.0623231	-1.5033
FUT9	-1.14408	6.22674	-4.99051	0.00403459	0.0623231	-1.50351
ARHGEF38	1.22174	8.06431	4.99048	0.00403469	0.0623231	-1.50353
TRAFD1	-1.11995	7.26177	-4.98887	0.00404032	0.0623498	-1.50501
ZNRF3	1.18293	5.15679	4.98419	0.00405669	0.0625348	-1.50931
RAB25	1.38615	7.25634	4.98309	0.00406058	0.0625348	-1.51032
SQSTM1	-1.60258	11.6396	-4.98023	0.00407064	0.0625348	-1.51295
SIGLEC8	1.1292	5.94063	4.98	0.00407144	0.0625348	-1.51316
RASSF9	1.10926	7.0916	4.97804	0.00407835	0.0625348	-1.51496
TGFBRAP1	-1.73902	6.72716	-4.97681	0.00408271	0.0625348	-1.51609
SPACA1	-1.72771	5.25241	-4.97624	0.00408472	0.0625348	-1.51662
DCAF8L1	-1.01311	5.81656	-4.97593	0.00408581	0.0625348	-1.5169
ERGIC1	-1.30377	7.13999	-4.97509	0.00408877	0.0625348	-1.51767
TEK	-2.24835	7.62996	-4.97433	0.00409147	0.0625348	-1.51837
C17orf108	-1.03745	6.74054	-4.97192	0.00410004	0.0626059	-1.52059
ACTA2	-1.03751	7.34221	-4.96828	0.00411298	0.0627435	-1.52394
CTTNBP2NL	-1.37843	6.94152	-4.96454	0.00412634	0.0628543	-1.52738
MPPED2	1.01893	5.29617	4.96405	0.00412811	0.0628543	-1.52784
PRDM15	1.07904	6.89691	4.96224	0.00413459	0.062893	-1.5295
KLRD1	1.03521	5.98926	4.95862	0.00414759	0.0630182	-1.53284
KPTN	-1.54948	7.11682	-4.95775	0.00415071	0.0630182	-1.53364
TRIM41	-1.0451	7.14542	-4.95438	0.0041629	0.06304	-1.53675
DPF2	1.09097	5.6154	4.95423	0.00416344	0.06304	-1.53689
FAM45A	-1.02484	5.12444	-4.95408	0.00416399	0.06304	-1.53703
ROGDI	-1.14515	6.07101	-4.94964	0.00418008	0.0632238	-1.54113
FAM195B	1.06835	12.9532	4.94696	0.00418983	0.063266	-1.5436
TEKT1	-1.06635	7.1548	-4.94669	0.0041908	0.063266	-1.54385
FBXO10	-1.03432	7.22087	-4.9401	0.00421489	0.063372	-1.54994
SLC51B	1.35552	5.51751	4.94004	0.00421514	0.063372	-1.55
PCDP1	-1.15244	6.68285	-4.93794	0.00422284	0.063372	-1.55194
SH2D4B	-1.00578	5.06704	-4.93672	0.00422732	0.063372	-1.55306
ZNF160	-1.07037	8.27909	-4.93395	0.00423755	0.063372	-1.55563
BIN2	1.08699	5.63693	4.93093	0.0042487	0.063372	-1.55842
LCE2D	1.08468	5.0833	4.93024	0.00425124	0.063372	-1.55906
C9orf106	1.37096	5.75911	4.93022	0.00425131	0.063372	-1.55908
ANKRD63	-1.00723	5.79118	-4.92822	0.00425874	0.063372	-1.56093
PORCN	1.19131	9.34271	4.92696	0.00426342	0.063372	-1.5621
MAP7D2	1.28237	7.02839	4.92612	0.00426654	0.063372	-1.56288
C1orf177	-1.19869	6.55027	-4.92551	0.00426882	0.063372	-1.56345
TRADD	-1.20159	6.57401	-4.92475	0.00427164	0.063372	-1.56415
PKHD1	1.21069	5.21702	4.92316	0.00427757	0.063372	-1.56562
CRYM	1.13985	7.51731	4.92237	0.00428054	0.063372	-1.56636
GNA11	-1.44151	9.14607	-4.92198	0.004282	0.063372	-1.56672
KIDINS220	-1.84921	5.34941	-4.92164	0.00428324	0.063372	-1.56703
CTNNBL1	-1.10449	7.76747	-4.92086	0.00428617	0.063372	-1.56776
CCM2	-1.05475	6.2944	-4.92048	0.00428761	0.063372	-1.56811
OR8H1	1.05687	5.29351	4.9189	0.00429351	0.063372	-1.56958
ANKRD32	-1.05599	7.8727	-4.91807	0.00429661	0.063372	-1.57034
CRTC2	1.01481	5.88761	4.91581	0.0043051	0.063372	-1.57244
GLT25D1	-1.30505	6.98576	-4.91571	0.0043055	0.063372	-1.57254
RCE1	1.52239	7.35977	4.91562	0.00430584	0.063372	-1.57262
GPR55	1.08939	5.10441	4.91389	0.00431234	0.063372	-1.57423
CLNK	1.23778	5.83407	4.91376	0.00431284	0.063372	-1.57435
AVPI1	-1.35414	5.86882	-4.912	0.00431947	0.063372	-1.57598
CD72	-1.1551	5.31764	-4.91028	0.00432595	0.063372	-1.57758
ZG16B	1.48219	11.7301	4.90953	0.0043288	0.063372	-1.57828
VPS4B	-1.4003	8.37134	-4.90891	0.00433115	0.063372	-1.57886
ADAMTS12	-1.55723	5.54452	-4.90626	0.00434121	0.063372	-1.58132
PCDHB12	1.00434	5.73955	4.90574	0.00434317	0.063372	-1.5818
ILF3	-1.02641	9.0205	-4.90455	0.0043477	0.063372	-1.58291
KIAA0317	-1.04209	6.79091	-4.90451	0.00434785	0.063372	-1.58295
NAT16	1.18552	5.63693	4.90417	0.00434915	0.063372	-1.58326
FNIP2	-1.09948	7.47034	-4.90223	0.00435654	0.063372	-1.58507
NDUFV1	-1.08291	8.4598	-4.90162	0.00435887	0.063372	-1.58564
NRXN1	1.11656	5.24068	4.90159	0.00435898	0.063372	-1.58567
TRABD2A	1.20714	6.27802	4.90096	0.00436137	0.063372	-1.58625
AKR1B10	-1.04312	5.68953	-4.89962	0.0043665	0.063372	-1.5875
MRGPRG	1.38617	11.9485	4.89881	0.00436959	0.063372	-1.58825
BNIP2	-1.06232	7.3175	-4.89863	0.00437028	0.063372	-1.58842
SUSD2	1.29251	4.63821	4.89854	0.00437064	0.063372	-1.5885
RASGEF1C	-1.2584	6.66433	-4.89808	0.0043724	0.063372	-1.58893
FCGR2A	1.56658	4.85786	4.89556	0.00438205	0.0634543	-1.59128
EZR	-1.23451	6.37923	-4.89359	0.00438962	0.0635063	-1.59311
MAGEA3	-1.23969	6.3996	-4.89144	0.0043979	0.0635686	-1.59512
SIK2	-1.14837	5.86444	-4.88859	0.00440888	0.0636183	-1.59777
ANO8	1.00969	5.33551	4.88848	0.00440931	0.0636183	-1.59787
INHBC	-1.19037	5.4888	-4.88532	0.00442157	0.0636714	-1.60083
HNF1A	1.11425	5.7617	4.885	0.00442279	0.0636714	-1.60112
NMBR	1.31816	6.10352	4.88445	0.00442495	0.0636714	-1.60164
FCER1A	1.05357	5.6684	4.88224	0.00443353	0.0637374	-1.6037
DNAJA3	-1.02058	7.31605	-4.87919	0.0044454	0.0638506	-1.60654
CPEB3	1.00664	5.88842	4.87519	0.00446105	0.0638706	-1.61028
CSRNP1	1.16648	7.35401	4.8741	0.00446532	0.0638706	-1.6113
FAM186B	-1.76543	6.1647	-4.87389	0.00446616	0.0638706	-1.6115
TREML2	1.1441	5.9725	4.87373	0.00446678	0.0638706	-1.61165
GOLT1A	1.12584	4.92914	4.86445	0.00450337	0.0643361	-1.62033
MYCBPAP	1.12143	7.2529	4.86092	0.00451738	0.0644436	-1.62363
SLC52A2	1.04702	7.70744	4.86053	0.00451896	0.0644436	-1.624
LHX1	1.72803	8.41	4.85809	0.00452865	0.0645242	-1.62628
GRK7	1.19829	6.3325	4.85303	0.00454888	0.064697	-1.63103
LMO1	-1.33672	4.87229	-4.84903	0.00456496	0.0648607	-1.63478
MLN	-1.09423	6.66675	-4.84815	0.00456851	0.0648607	-1.63561
TTK	-1.04519	7.14701	-4.84504	0.00458107	0.0649374	-1.63853
ODF3B	1.21511	8.90592	4.84396	0.00458543	0.0649374	-1.63954
DACT3	-1.02967	4.60145	-4.84379	0.00458611	0.0649374	-1.6397
TRIM50	1.18123	7.02884	4.8384	0.00460801	0.0650869	-1.64477
LRRC19	-1.35547	5.10931	-4.83822	0.00460873	0.0650869	-1.64494
UGT8	1.01639	5.86405	4.83818	0.00460889	0.0650869	-1.64497
RSPO2	1.04629	4.96295	4.83429	0.00462478	0.0650891	-1.64864
SMC1B	-1.0878	8.39936	-4.83403	0.00462583	0.0650891	-1.64888
SYCN	-1.06902	7.85406	-4.83358	0.00462766	0.0650891	-1.6493
TPSD1	1.83869	9.9545	4.83339	0.00462844	0.0650891	-1.64948
FHDC1	1.12146	5.56445	4.83293	0.00463034	0.0650891	-1.64992
CRYBA2	1.71703	7.70472	4.83127	0.00463714	0.0650891	-1.65148
C1orf100	1.48729	5.82515	4.83041	0.00464067	0.0650891	-1.65229
EPO	-1.16401	5.16539	-4.83017	0.00464166	0.0650891	-1.65252
NSUN6	-1.16078	5.94061	-4.8282	0.00464972	0.0650937	-1.65436
PRUNE2	-1.15778	7.83052	-4.8281	0.00465013	0.0650937	-1.65446
PPP6R1	1.07965	6.53131	4.82199	0.00467537	0.0653453	-1.66022
MFNG	-1.46706	7.70227	-4.82035	0.00468215	0.0653453	-1.66177
TMEM176B	1.00718	5.79991	4.81927	0.00468662	0.0653453	-1.66278
KIF18B	-1.3821	5.96393	-4.8188	0.00468856	0.0653453	-1.66322
TSHB	1.03181	5.98668	4.81558	0.00470197	0.0654751	-1.66626
TOP3A	-1.4485	10.7222	-4.80919	0.00472869	0.0656725	-1.6723
OR10P1	-1.3271	8.18313	-4.80908	0.00472915	0.0656725	-1.6724
CLU	-1.51447	9.41682	-4.8088	0.00473033	0.0656725	-1.67267
PRH2	-1.07855	5.1922	-4.80826	0.0047326	0.0656725	-1.67318
FANCE	1.38005	8.87566	4.80599	0.00474215	0.0657479	-1.67532
FLJ43860	-1.09775	6.85672	-4.80378	0.00475146	0.0658199	-1.67741
IZUMO4	-1.1904	8.38916	-4.80047	0.00476541	0.0658677	-1.68054
CLDN4	-1.01965	8.80494	-4.79964	0.00476893	0.0658677	-1.68132
TNFRSF13C	-1.26057	7.80169	-4.79773	0.00477703	0.0658884	-1.68313
RAC3	-1.12024	6.83754	-4.7964	0.00478271	0.0659098	-1.6844
C7orf71	1.14035	5.60221	4.79344	0.00479531	0.0660264	-1.6872
GALNT6	-1.01933	8.15002	-4.79107	0.00480538	0.0661082	-1.68943
SIPA1	1.01086	8.64588	4.78981	0.00481081	0.0661259	-1.69064
SEL1L3	-1.44618	5.97005	-4.78865	0.00481574	0.0661367	-1.69173
SIDT2	-1.20273	5.55379	-4.78655	0.00482478	0.0662039	-1.69373
ZNF687	-1.12045	7.03232	-4.78358	0.00483752	0.066309	-1.69654
CDC42EP4	1.01053	5.7311	4.78284	0.00484074	0.066309	-1.69725
PCP4L1	-1.10328	6.22151	-4.78148	0.00484661	0.0663325	-1.69853
C7orf33	-1.11476	5.29238	-4.77871	0.00485858	0.066345	-1.70116
BAG2	-1.02936	6.99688	-4.77721	0.00486505	0.066345	-1.70258
ECHDC3	1.07856	6.89069	4.7767	0.00486726	0.066345	-1.70307
TMEM31	1.04328	5.87436	4.77589	0.00487081	0.066345	-1.70384
OTOF	1.00115	8.50716	4.77517	0.00487392	0.066345	-1.70452
GSC	1.06869	5.2646	4.77468	0.00487605	0.066345	-1.70499
TANC1	-2.08118	6.94808	-4.7743	0.00487771	0.066345	-1.70535
CNTN2	-1.07568	7.20935	-4.77296	0.00488352	0.066345	-1.70662
PRPF4	-1.17301	11.6673	-4.77182	0.0048885	0.066345	-1.70771
TYROBP	1.0203	4.46445	4.77158	0.00488953	0.066345	-1.70793
INPP5D	1.20929	8.70443	4.77074	0.00489321	0.066345	-1.70873
MZF1	-1.23721	6.64316	-4.76596	0.00491411	0.0664646	-1.71328
PAFAH2	-1.31333	6.45338	-4.76578	0.00491489	0.0664646	-1.71344
NT5C3L	-1.01411	7.64913	-4.76545	0.00491637	0.0664646	-1.71376
ARHGEF10L	1.97096	6.80387	4.76421	0.00492182	0.0664646	-1.71495
DTX4	1.12737	6.49406	4.76397	0.00492284	0.0664646	-1.71517
KRT19	-1.44576	6.44384	-4.7629	0.00492758	0.0664724	-1.71619
GM2A	-1.16454	7.21241	-4.76106	0.00493565	0.0665187	-1.71794
TNNT1	1.34416	10.5253	4.76012	0.00493981	0.0665187	-1.71884
PPME1	-1.15473	5.8737	-4.75852	0.00494688	0.0665187	-1.72036
SPR	-1.09685	9.65783	-4.75814	0.00494854	0.0665187	-1.72072
MYO3A	1.06071	4.76207	4.7574	0.00495184	0.0665187	-1.72143
VPS13D	-1.33447	6.97833	-4.75269	0.00497273	0.0667432	-1.72592
EXT1	-1.11159	9.6942	-4.74783	0.00499438	0.0668723	-1.73055
LIMA1	1.07742	9.08548	4.74689	0.00499859	0.0668723	-1.73144
HSPA12B	1.25201	9.0404	4.74678	0.00499909	0.0668723	-1.73155
DMRT3	-1.01786	6.31215	-4.74342	0.00501415	0.0670175	-1.73476
PICK1	-1.31691	5.40018	-4.74105	0.00502481	0.0671039	-1.73702
PRR19	1.20088	7.82511	4.73979	0.00503047	0.0671234	-1.73822
C8orf73	-1.20455	5.11605	-4.73565	0.00504916	0.0672043	-1.74218
TREX1	1.14853	8.91494	4.73399	0.00505671	0.0672063	-1.74377
FAM159A	3.02668	7.63296	4.7331	0.00506075	0.0672063	-1.74462
P2RY14	-1.22591	7.60589	-4.73284	0.00506193	0.0672063	-1.74487
PLEKHF1	-1.45289	4.94674	-4.72919	0.00507854	0.0673384	-1.74837
C9orf174	1.15663	5.83731	4.72723	0.00508745	0.0673384	-1.75023
TJAP1	-1.03767	7.94536	-4.72613	0.00509247	0.0673384	-1.75129
KCNA4	1.02068	5.80621	4.72593	0.00509339	0.0673384	-1.75148
OR10A5	-1.13238	6.48476	-4.72577	0.00509412	0.0673384	-1.75163
PLEKHO2	-1.00522	8.77171	-4.72461	0.00509946	0.0673384	-1.75275
MX1	-1.54365	5.56379	-4.72418	0.0051014	0.0673384	-1.75315
FN3KRP	-1.45515	6.91694	-4.72255	0.00510888	0.0673815	-1.75472
CNKSR1	-1.28551	5.66991	-4.72052	0.00511822	0.067449	-1.75667
NAGA	-1.1622	7.28187	-4.7196	0.00512245	0.0674492	-1.75755
TIGD3	-1.12142	4.85703	-4.71717	0.00513363	0.0674775	-1.75987
TNFSF14	1.01671	6.36364	4.71695	0.00513464	0.0674775	-1.76008
TFPT	-1.14455	5.82524	-4.71638	0.00513728	0.0674775	-1.76063
CGB	1.11799	5.6084	4.71381	0.00514919	0.0675784	-1.7631
FOXRED1	-1.10896	5.70844	-4.71199	0.0051576	0.0676332	-1.76484
CSMD2	1.09483	6.30878	4.70986	0.0051675	0.0676786	-1.76689
TIMD4	1.28933	7.66322	4.70931	0.00517007	0.0676786	-1.76742
UBL4A	-1.24863	6.99627	-4.70851	0.00517378	0.0676786	-1.76818
BMP8B	-1.1015	6.82482	-4.70091	0.00520931	0.0680608	-1.77548
MANSC1	-1.14019	9.52352	-4.70044	0.00521152	0.0680608	-1.77594
PRAMEF16	1.1091	5.06651	4.69933	0.00521674	0.0680734	-1.77701
CCDC92	-1.5944	7.90224	-4.69521	0.00523615	0.0681731	-1.78097
FBXO39	1.07928	6.14407	4.69403	0.00524175	0.0681731	-1.78211
ERLIN1	-1.13569	9.34202	-4.69295	0.00524686	0.0681731	-1.78315
FBXL18	-1.17509	8.03482	-4.69228	0.00524999	0.0681731	-1.78379
SSPN	1.0324	7.20014	4.68818	0.00526948	0.0682769	-1.78774
C1orf204	-1.2301	5.22031	-4.68613	0.00527924	0.0682881	-1.78971
ADAMTSL5	1.59183	11.2688	4.68564	0.00528157	0.0682881	-1.79018
MTG1	-1.02453	6.01761	-4.68117	0.00530295	0.0684158	-1.7945
NUP155	1.10455	6.15521	4.67967	0.00531016	0.0684535	-1.79595
ALPK1	-1.04138	5.90065	-4.67739	0.00532109	0.0684589	-1.79814
PCNT	-1.34887	5.79965	-4.67646	0.00532559	0.0684589	-1.79904
ZNF74	2.00436	6.0801	4.67554	0.00532999	0.0684589	-1.79992
EDARADD	1.09639	6.69069	4.67442	0.0053354	0.0684589	-1.80101
KRTAP13-3	1.22099	6.30361	4.6728	0.00534324	0.0684589	-1.80258
C9orf50	-1.1576	6.22346	-4.67271	0.00534367	0.0684589	-1.80266
GAGE2E	-1.20163	5.13813	-4.67211	0.00534658	0.0684589	-1.80324
GPLD1	1.05345	5.77943	4.67158	0.00534916	0.0684589	-1.80376
BCKDHB	-1.29603	6.58492	-4.66901	0.00536159	0.0684751	-1.80623
SPHKAP	1.04944	6.79444	4.66849	0.00536414	0.0684751	-1.80674
CRAMP1L	1.58742	10.3781	4.66829	0.00536508	0.0684751	-1.80693
S100A7A	1.04189	8.61744	4.66646	0.00537401	0.0685026	-1.8087
SLC22A13	1.1445	10.1876	4.66491	0.00538153	0.0685438	-1.8102
LCE2C	2.19657	9.61868	4.65783	0.00541619	0.0688519	-1.81705
SLC10A4	-1.22529	8.53824	-4.65728	0.00541887	0.0688519	-1.81758
TRAK2	-1.02369	7.27848	-4.65645	0.00542297	0.0688519	-1.81839
SNX31	1.05099	5.63994	4.65436	0.00543326	0.0689278	-1.82041
KRT16	-1.00162	5.54348	-4.65119	0.0054489	0.0689419	-1.82348
RHOT2	-2.14994	5.74548	-4.65118	0.00544896	0.0689419	-1.82349
RNF112	-1.32482	5.11925	-4.64995	0.00545504	0.0689419	-1.82468
GLI4	-1.04549	5.76452	-4.64976	0.00545596	0.0689419	-1.82486
GOLPH3	-1.38814	6.69263	-4.64239	0.00549263	0.0692183	-1.83202
MKL2	-1.25832	6.11304	-4.64188	0.00549517	0.0692183	-1.83251
PI4K2B	-1.1963	5.47868	-4.63851	0.00551202	0.069339	-1.83578
MOSPD1	1.13906	9.01862	4.63621	0.00552355	0.0694116	-1.83801
FIZ1	-1.18407	8.18017	-4.63406	0.00553438	0.0694931	-1.8401
HRH2	1.29425	5.28662	4.63148	0.00554739	0.0695398	-1.84261
TRAT1	-1.34627	7.62622	-4.63008	0.00555449	0.0695398	-1.84398
ATF4	-1.12891	8.85815	-4.62715	0.00556934	0.0695398	-1.84683
GAPDH	-1.34623	13.6748	-4.62697	0.00557022	0.0695398	-1.847
USP21	1.16804	7.14031	4.62681	0.00557107	0.0695398	-1.84716
ADCY4	-1.13391	6.23638	-4.62634	0.0055734	0.0695398	-1.84761
DIRAS2	-1.18894	5.75435	-4.62562	0.0055771	0.0695398	-1.84832
PLXNA1	-1.14463	6.95934	-4.62551	0.00557764	0.0695398	-1.84842
SLC27A5	1.25549	5.7071	4.62416	0.00558449	0.0695398	-1.84973
PKP1	1.83532	4.88242	4.62303	0.00559027	0.0695398	-1.85084
ATP1B3	-1.16207	11.9002	-4.62301	0.00559035	0.0695398	-1.85085
TULP1	1.04903	6.47878	4.62031	0.00560414	0.0696571	-1.85348
WEE1	-1.24783	7.96437	-4.61785	0.00561675	0.0696846	-1.85588
GAB2	1.54369	6.80942	4.6168	0.00562212	0.0696846	-1.8569
AQP10	1.06095	11.0504	4.61562	0.00562814	0.0696846	-1.85805
STK25	-1.38349	8.85026	-4.61101	0.00565189	0.0698416	-1.86255
ZNF366	-1.08079	5.30248	-4.61055	0.00565428	0.0698416	-1.863
PDGFA	-1.19438	5.69025	-4.60709	0.00567219	0.0698416	-1.86638
KLK5	-1.18023	5.78073	-4.60674	0.00567398	0.0698416	-1.86671
FBXL20	-1.30861	4.69247	-4.60544	0.00568074	0.0698481	-1.86799
SLC16A9	-1.00134	6.35638	-4.60356	0.00569048	0.0698932	-1.86982
NFIX	1.01122	8.81616	4.60305	0.00569315	0.0698932	-1.87032
LENEP	1.4018	9.7588	4.59823	0.0057183	0.0700675	-1.87503
FAM156B	-1.02421	7.12451	-4.59776	0.00572073	0.0700675	-1.87548
LCE5A	-1.00836	5.96324	-4.59694	0.00572502	0.0700675	-1.87628
ACSL1	-1.45023	5.10903	-4.59534	0.00573345	0.0700675	-1.87786
NPB	1.71939	7.43778	4.59501	0.00573519	0.0700675	-1.87818
FLVCR1	-1.26981	7.13638	-4.59446	0.00573806	0.0700675	-1.87872
OR10A6	1.03917	6.9114	4.59251	0.0057483	0.0701389	-1.88062
PRKAA2	1.24267	5.23462	4.58795	0.00577235	0.0703249	-1.88508
SUGP1	-1.44313	6.603	-4.58616	0.00578185	0.0703373	-1.88684
BRD3	-1.05368	7.67238	-4.58526	0.00578658	0.0703373	-1.88771
ESRRB	-1.04765	4.93521	-4.5826	0.00580071	0.0704019	-1.89032
SCAF4	1.07548	5.78284	4.5767	0.0058322	0.07059	-1.89611
GTF2IRD1	-1.27681	7.39318	-4.57581	0.00583694	0.07059	-1.89698
VPS39	-1.27601	6.96903	-4.57468	0.00584304	0.07059	-1.89809
CYP2R1	-1.20263	7.6054	-4.5742	0.00584559	0.07059	-1.89856
PMM2	-1.17391	6.70551	-4.57343	0.00584976	0.07059	-1.89932
KCTD5	-1.51233	6.93645	-4.57309	0.00585156	0.07059	-1.89965
DYNC2H1	1.62238	7.55397	4.57162	0.00585948	0.0706322	-1.9011
GAGE13	-1.12379	4.90265	-4.56786	0.00587976	0.0708107	-1.90479
SPI1	1.06397	6.86426	4.56543	0.00589287	0.0708107	-1.90717
PTCRA	1.49737	8.83853	4.56444	0.00589827	0.0708107	-1.90815
MEI1	1.35402	5.56447	4.56419	0.00589958	0.0708107	-1.90839
NAPSA	1.00946	6.96809	4.56347	0.00590351	0.0708107	-1.9091
ZNF691	-1.04852	6.00526	-4.56314	0.00590532	0.0708107	-1.90943
DSCR6	-1.06874	6.09406	-4.56026	0.00592098	0.070892	-1.91226
ATHL1	-1.4091	5.55109	-4.55914	0.00592705	0.0709115	-1.91336
OR8S1	1.01896	4.85766	4.55362	0.00595724	0.0711215	-1.91879
DCAF15	-1.0618	7.17329	-4.55148	0.00596899	0.0711999	-1.92089
SEPW1	-1.16344	12.5342	-4.5504	0.00597492	0.0712175	-1.92196
PEX11G	-1.1312	7.35132	-4.54877	0.00598394	0.0712718	-1.92357
DBNDD1	1.06712	11.6626	4.54537	0.00600268	0.0713886	-1.92691
ATF7	1.0588	9.93151	4.5425	0.00601861	0.0715247	-1.92975
APCDD1	-1.15129	8.40159	-4.53561	0.00605698	0.0718154	-1.93654
RPGRIP1	1.08051	5.54022	4.53477	0.00606169	0.0718154	-1.93738
PITPNM3	-1.50287	5.37892	-4.53341	0.00606932	0.0718154	-1.93872
SPATA20	1.06405	6.15884	4.52827	0.00609819	0.0720232	-1.9438
UBE2E3	1.28507	13.9812	4.52811	0.0060991	0.0720232	-1.94396
PTPN14	-1.33052	5.30303	-4.52754	0.00610233	0.0720232	-1.94452
FUT4	-1.10867	7.09154	-4.52695	0.00610565	0.0720232	-1.94511
ADAMTS17	1.0366	6.18019	4.52512	0.006116	0.0720511	-1.94692
ZNF219	-1.42259	5.53233	-4.52475	0.0061181	0.0720511	-1.94728
FRS3	-1.5664	7.45997	-4.52176	0.00613503	0.0721159	-1.95024
TBC1D10C	-1.10829	5.20261	-4.52157	0.00613608	0.0721159	-1.95042
RBMXL3	1.3666	5.76216	4.51918	0.00614967	0.0722224	-1.95279
THAP9	-1.08081	8.31955	-4.51529	0.00617187	0.0723767	-1.95664
CPEB1	1.36102	5.73484	4.51373	0.00618079	0.0724281	-1.95819
CHST4	1.47126	6.31763	4.50814	0.00621289	0.0726876	-1.96373
TP53AIP1	-1.24492	6.174	-4.5075	0.00621658	0.0726876	-1.96437
OR4A16	1.1154	7.21672	4.50147	0.00625141	0.0729183	-1.97035
FDCSP	-1.30774	9.16938	-4.50041	0.00625758	0.0729183	-1.9714
NFKBIZ	-1.28647	6.11709	-4.49962	0.00626215	0.0729183	-1.97218
HTRA3	-2.07168	5.94094	-4.49779	0.00627284	0.0729183	-1.97401
GALNTL4	-1.2712	5.60391	-4.49026	0.00631683	0.0732203	-1.98149
JAK1	-2.86696	7.21243	-4.48951	0.00632124	0.0732203	-1.98223
OR52M1	1.15507	5.05391	4.48943	0.00632174	0.0732203	-1.98232
PGAP3	1.22285	8.15044	4.48678	0.00633729	0.0733472	-1.98495
ZNF71	-1.33861	5.10073	-4.47988	0.00637812	0.0735438	-1.99182
GRHL3	1.01286	7.88926	4.47757	0.00639184	0.0736052	-1.99412
TUBB2A	-1.10473	9.0396	-4.47667	0.0063972	0.0736139	-1.99502
TGM2	-1.86425	8.51629	-4.47192	0.00642559	0.0737582	-1.99976
AK4	1.05896	6.35987	4.47163	0.00642735	0.0737582	-2.00005
CNDP2	-1.172	9.49307	-4.47071	0.00643283	0.0737582	-2.00096
DOCK7	-1.35992	5.57314	-4.46511	0.0064665	0.073932	-2.00655
EIF4E	1.03838	9.73513	4.4592	0.00650227	0.0742878	-2.01246
C16orf59	-1.30531	9.79222	-4.45159	0.00654867	0.0746599	-2.02007
LIF	1.21208	12.934	4.45156	0.00654887	0.0746599	-2.02011
KLF15	1.01892	5.03835	4.44964	0.0065606	0.074687	-2.02202
HNRNPH2	-1.21365	11.3526	-4.44478	0.0065905	0.0749141	-2.02689
FDX1L	-1.32954	6.21662	-4.44411	0.00659461	0.0749141	-2.02756
TMEM97	-1.20761	7.90727	-4.44246	0.00660484	0.0749769	-2.02922
ZNF264	1.37055	7.42798	4.43981	0.00662126	0.0749874	-2.03188
NPR3	-1.00971	7.28992	-4.43867	0.00662831	0.0749874	-2.03302
LOC100288524	-1.31239	7.28493	-4.43797	0.00663267	0.0749874	-2.03372
MAGEL2	-1.22908	7.98263	-4.43759	0.006635	0.0749874	-2.0341
RHOXF2B	-1.01556	6.40018	-4.43664	0.00664093	0.0749874	-2.03505
SDHB	-1.43577	6.79205	-4.43628	0.00664314	0.0749874	-2.03541
PTN	1.07793	4.8192	4.43527	0.00664946	0.0749874	-2.03643
ATP1B2	-1.21579	8.08923	-4.43526	0.00664953	0.0749874	-2.03644
BRD2	-1.12772	7.71775	-4.43277	0.00666503	0.0749874	-2.03893
SLC10A6	1.14663	7.34314	4.43266	0.00666575	0.0749874	-2.03905
RPA4	1.04197	9.11675	4.4276	0.00669745	0.0752791	-2.04413
NICN1	1.00339	7.89724	4.42655	0.00670404	0.0753002	-2.04518
NUMA1	-1.19462	5.83498	-4.42376	0.00672159	0.0753669	-2.04798
ZNF474	1.22524	8.03901	4.42357	0.0067228	0.0753669	-2.04818
GLYAT	1.3003	6.65676	4.42198	0.00673288	0.0753695	-2.04978
OR56B1	-1.04666	6.64461	-4.42152	0.00673574	0.0753695	-2.05024
DUSP5	-1.05026	6.04364	-4.41981	0.00674657	0.075386	-2.05196
AAR2	1.05184	8.83365	4.41936	0.00674943	0.075386	-2.05241
LUC7L2	-1.04463	9.05314	-4.41738	0.00676201	0.0754025	-2.05441
ZNF774	-1.10016	5.96614	-4.41321	0.00678856	0.0755588	-2.0586
SHC4	1.77364	5.83293	4.41215	0.00679533	0.0755815	-2.05967
UBE2NL	1.11006	12.4352	4.40533	0.00683905	0.0759092	-2.06654
GADD45A	-1.15266	12.412	-4.40364	0.00684994	0.075955	-2.06825
IZUMO2	-1.04607	7.37686	-4.40321	0.00685269	0.075955	-2.06868
CORO1B	-1.48385	7.11782	-4.40033	0.00687134	0.0760827	-2.07159
PARM1	-1.4413	6.48749	-4.39694	0.00689328	0.0762461	-2.075
SPATA21	-1.35106	8.59907	-4.39596	0.00689967	0.076264	-2.076
IL17A	1.97391	5.94319	4.39464	0.00690823	0.0762891	-2.07733
EFCAB4A	1.57515	9.70701	4.39164	0.00692781	0.0762891	-2.08036
TBC1D22A	-1.42314	6.35749	-4.39015	0.00693756	0.0762891	-2.08187
EPB41L1	-1.04518	4.89441	-4.39008	0.00693805	0.0762891	-2.08194
ITGA3	-1.09377	5.9357	-4.38976	0.00694015	0.0762891	-2.08227
CEACAM8	-1.25303	5.11792	-4.38572	0.00696666	0.0763722	-2.08635
DEDD2	-1.5026	13.3567	-4.38356	0.00698083	0.0764215	-2.08853
DBNL	-1.16186	7.84432	-4.38244	0.00698821	0.0764215	-2.08966
TMEM200A	-1.32094	6.06942	-4.38027	0.00700255	0.0764215	-2.09186
NUCB1	-1.07825	9.05893	-4.38	0.00700438	0.0764215	-2.09214
NADSYN1	-1.06074	7.9687	-4.37998	0.00700452	0.0764215	-2.09216
C17orf79	-1.10817	6.56428	-4.37933	0.00700879	0.0764215	-2.09281
EFHB	1.08235	7.01191	4.37881	0.00701226	0.0764215	-2.09334
RTN1	1.03125	5.27561	4.37568	0.007033	0.0765199	-2.09651
KRT6B	-1.04162	8.98517	-4.3719	0.0070582	0.0766497	-2.10034
HMP19	1.00603	7.3556	4.3715	0.00706083	0.0766497	-2.10074
ZNF280A	1.06703	6.68114	4.37101	0.00706411	0.0766497	-2.10124
SLCO4C1	-1.04898	5.00197	-4.37079	0.00706559	0.0766497	-2.10146
ZNF804A	-1.03036	5.35333	-4.37029	0.00706894	0.0766497	-2.10197
VDR	-1.24547	5.26435	-4.36889	0.0070783	0.0766992	-2.10339
DEPDC7	1.1925	8.25129	4.36213	0.00712379	0.0769312	-2.11026
TMEM156	-1.08312	7.25481	-4.35901	0.00714485	0.0769509	-2.11342
UNC13B	-1.32167	8.67275	-4.35866	0.0071472	0.0769509	-2.11377
PLEKHO1	-1.65562	8.59196	-4.35758	0.00715453	0.0769509	-2.11487
PITX3	-1.03747	9.36373	-4.35496	0.00717234	0.0770854	-2.11754
KLF6	-1.30646	12.5312	-4.35391	0.00717946	0.0770854	-2.1186
OR10G2	1.192	8.83499	4.35361	0.00718151	0.0770854	-2.11891
C6orf228	1.38948	9.42634	4.35174	0.00719428	0.077137	-2.12081
IMP4	-1.02363	6.45863	-4.35149	0.00719597	0.077137	-2.12106
CCDC85C	-1.11986	7.54794	-4.34962	0.00720876	0.0771985	-2.12297
HDC	-1.01747	7.34232	-4.34879	0.00721441	0.0771985	-2.12381
TTLL6	-1.21254	7.60723	-4.34853	0.00721621	0.0771985	-2.12407
KCTD17	-1.3567	6.75372	-4.34015	0.00727388	0.0775945	-2.13261
AP1M2	-1.2116	4.85391	-4.33893	0.00728227	0.0775945	-2.13384
GORASP2	-1.1053	8.5356	-4.33784	0.00728987	0.0775945	-2.13496
RRS1	-1.76648	7.6642	-4.33632	0.00730039	0.0775945	-2.13651
AGTR2	-1.30316	7.3422	-4.33528	0.0073076	0.0775945	-2.13757
MC4R	-1.03975	7.25236	-4.33472	0.00731153	0.0775945	-2.13814
PSPH	1.07851	10.05	4.334	0.00731652	0.0775959	-2.13888
OAS3	-1.2895	5.44056	-4.32906	0.007351	0.0779098	-2.14392
DUSP8	-1.10358	4.77062	-4.32791	0.00735904	0.0779416	-2.14509
IL27RA	-1.18263	8.05282	-4.3268	0.00736685	0.0779416	-2.14623
PGM2L1	-1.2393	6.12391	-4.32362	0.0073892	0.0781074	-2.14947
APOC1	-1.07678	9.05741	-4.32075	0.00740939	0.0781602	-2.1524
SPP1	-1.43522	7.74965	-4.31885	0.00742281	0.0782039	-2.15434
CNNM1	-1.10662	4.77798	-4.31372	0.00745923	0.078324	-2.15959
RING1	-1.36345	8.15955	-4.31345	0.00746117	0.078324	-2.15987
CDH5	-1.20338	6.02999	-4.3112	0.00747718	0.078324	-2.16217
MAGEC1	-1.04679	8.71601	-4.31069	0.0074808	0.078324	-2.16269
POU5F1	-1.40745	8.64887	-4.30837	0.00749739	0.0784206	-2.16506
STX10	-1.05126	7.37354	-4.30752	0.00750352	0.0784334	-2.16594
EMILIN3	1.12973	5.29939	4.30561	0.00751721	0.0784738	-2.1679
MED9	-1.02756	7.56087	-4.3028	0.00753739	0.0785818	-2.17077
NID2	-1.23318	9.02044	-4.30188	0.00754406	0.0785999	-2.17172
WDR83OS	-1.06403	12.6713	-4.29947	0.00756147	0.0787283	-2.17419
EHMT1	-1.00008	6.99906	-4.29879	0.00756638	0.0787283	-2.17489
MAPK15	-1.44385	9.46589	-4.29813	0.00757117	0.0787283	-2.17557
USP9Y	1.63583	6.74341	4.29141	0.00761994	0.079081	-2.18245
SH3BP5	-1.03195	10.6158	-4.28435	0.00767168	0.0794454	-2.18972
CA11	1.00354	6.99793	4.28389	0.00767501	0.0794454	-2.19018
HMGN2	1.52717	13.6289	4.27867	0.00771353	0.0797414	-2.19555
RNF167	-1.23443	10.2635	-4.27728	0.00772383	0.0797947	-2.19698
IPO4	-1.20757	7.77801	-4.27325	0.00775379	0.0799405	-2.20114
CNTFR	1.35016	10.4574	4.27271	0.00775781	0.0799405	-2.20169
BOK	-1.05894	5.93244	-4.26933	0.00778301	0.0800376	-2.20517
ZMYND10	1.04196	6.75343	4.26823	0.00779118	0.0800376	-2.2063
SMC4	1.15161	10.049	4.26809	0.00779229	0.0800376	-2.20645
ZNF429	-1.22804	7.11715	-4.2652	0.00781394	0.0801331	-2.20943
C7orf57	1.01867	5.07926	4.26417	0.00782166	0.0801331	-2.21049
DHX8	-1.15137	8.54187	-4.26229	0.00783584	0.0801755	-2.21243
TBC1D10A	-1.3389	5.17767	-4.25511	0.0078901	0.080433	-2.21984
CRYGB	-1.12847	6.25887	-4.25496	0.00789122	0.080433	-2.21999
SLC7A5	1.04089	7.09441	4.25428	0.00789641	0.0804346	-2.22069
EID2B	1.52	9.15525	4.25227	0.00791171	0.080539	-2.22277
HELZ	-1.53279	5.65806	-4.24854	0.00794015	0.0806744	-2.22662
SLC7A10	-1.06504	8.92785	-4.24786	0.00794542	0.0806765	-2.22733
CD34	-1.04596	8.8436	-4.24455	0.00797078	0.080736	-2.23075
XPO1	-1.25466	5.60824	-4.24423	0.00797326	0.080736	-2.23109
UTP20	1.01171	6.59898	4.24314	0.0079816	0.080736	-2.23221
EIF3A	-2.30342	6.73128	-4.24061	0.00800107	0.0807861	-2.23482
C14orf176	1.18401	5.13338	4.24053	0.00800173	0.0807861	-2.23491
EEF2	-1.55172	11.8535	-4.23943	0.0080102	0.0808206	-2.23605
HLA-DRA	1.25441	5.94595	4.23423	0.00805053	0.0810081	-2.24144
HDAC9	1.04046	8.08424	4.23361	0.0080553	0.0810081	-2.24208
CCNB3	-1.07561	6.48921	-4.23187	0.00806891	0.0810545	-2.24389
DUS2L	-1.00375	7.60663	-4.22908	0.00809069	0.0812005	-2.24678
DACH2	1.01329	7.06925	4.22445	0.00812695	0.0814467	-2.25158
RTEL1	-1.28701	8.2441	-4.22362	0.00813345	0.0814467	-2.25244
PSEN1	-1.09329	7.84401	-4.2206	0.00815728	0.081583	-2.25558
PPP1R15B	-1.69174	6.1494	-4.2178	0.00817937	0.0816718	-2.25848
HPDL	1.68726	8.09688	4.21753	0.0081815	0.0816718	-2.25876
TMEM178A	-1.70963	6.59592	-4.214	0.00820955	0.0818169	-2.26244
DOK4	-1.15051	7.14144	-4.21099	0.0082335	0.081986	-2.26556
GLA	3.08227	8.25068	4.21007	0.00824084	0.0820079	-2.26652
PRSS1	1.00378	11.8204	4.20718	0.00826394	0.0820843	-2.26952
PLK2	-1.15021	13.2637	-4.20481	0.00828292	0.0821706	-2.27199
ID1	-1.50478	9.85103	-4.20036	0.0083188	0.0824754	-2.27663
TMEM61	-1.17374	6.82544	-4.19952	0.00832554	0.082491	-2.2775
SLC16A6	2.82807	6.5808	4.19869	0.00833227	0.0825065	-2.27837
CRK	-1.29449	8.38638	-4.19559	0.00835734	0.0825844	-2.28159
2019-03-04	-1.93312	5.37875	-4.19345	0.00837475	0.0826709	-2.28383
A2M	-1.28764	8.63608	-4.19268	0.00838106	0.0826821	-2.28464
TMEM9	-1.21795	6.82103	-4.19072	0.008397	0.0827391	-2.28668
OVCA2	-1.34228	8.44059	-4.19006	0.00840238	0.0827391	-2.28736
ESYT1	-2.4448	7.7895	-4.1886	0.0084143	0.0828055	-2.28889
PAPOLB	1.19575	5.65807	4.18641	0.00843223	0.0828287	-2.29117
ZNF157	1.10232	4.89285	4.18535	0.00844093	0.082832	-2.29228
ARMC6	-1.18997	5.88005	-4.18252	0.00846424	0.0829901	-2.29524
CCL28	-1.02911	6.74078	-4.18131	0.00847414	0.0830342	-2.29649
KRTAP1-3	1.03144	7.62716	4.18038	0.00848182	0.0830342	-2.29747
ACAN	1.09616	5.19135	4.17929	0.00849083	0.0830342	-2.29861
STARD9	-1.28583	6.12614	-4.17579	0.00851984	0.0831349	-2.30227
HOXD1	-1.25595	6.52691	-4.17569	0.00852065	0.0831349	-2.30237
LPCAT2	1.03566	10.5964	4.17072	0.00856198	0.0833853	-2.30757
CXXC11	-1.25064	5.03629	-4.17006	0.0085675	0.0833882	-2.30826
PRSS56	1.38931	12.9551	4.1679	0.00858557	0.0835132	-2.31052
UGGT1	1.211	5.77177	4.16572	0.00860382	0.083589	-2.3128
KCNB1	-1.17906	8.85328	-4.16071	0.00864604	0.0837671	-2.31806
KRT34	-1.12888	6.81353	-4.1557	0.00868837	0.0838001	-2.32331
P2RX3	-1.15266	6.81187	-4.1548	0.00869603	0.0838001	-2.32425
UFSP1	1.26185	10.4478	4.15422	0.00870098	0.0838001	-2.32486
NT5M	1.04074	7.66653	4.15417	0.0087014	0.0838001	-2.32492
EVI5L	-1.32055	6.6333	-4.1536	0.00870625	0.0838001	-2.32552
ROCK1	-1.05601	7.46296	-4.15322	0.0087095	0.0838001	-2.32592
EML2	1.33178	7.3572	4.14805	0.00875357	0.0839761	-2.33134
HRK	-1.0291	6.42786	-4.14799	0.00875409	0.0839761	-2.3314
ATP1A2	1.3193	9.05625	4.1446	0.00878321	0.0841327	-2.33497
NUP62	-1.66587	6.32405	-4.14339	0.00879355	0.0841327	-2.33623
ELL3	-1.00589	6.01526	-4.14314	0.00879575	0.0841327	-2.3365
APBB1IP	1.27594	5.87845	4.14049	0.00881855	0.0842908	-2.33928
OSTM1	-1.23887	8.19751	-4.12396	0.0089626	0.0849698	-2.35669
KIAA1755	-1.00299	8.09569	-4.12053	0.00899288	0.085041	-2.36031
LONRF3	1.04973	5.25937	4.11357	0.00905457	0.0854564	-2.36766
ASMTL	-1.23312	6.72052	-4.10398	0.00914037	0.0858417	-2.37779
GAGE12F	-1.21887	5.23204	-4.09689	0.00920445	0.0858673	-2.3853
C3orf80	-1.19252	5.39755	-4.09618	0.00921086	0.0858673	-2.38604
APLP1	1.03508	5.14677	4.09467	0.00922457	0.0858673	-2.38764
C17orf47	2.38068	5.8854	4.09134	0.00925489	0.085966	-2.39117
TLR2	1.02116	4.54862	4.09046	0.00926293	0.085966	-2.3921
SIRPB1	1.02191	8.65764	4.087	0.00929458	0.0860814	-2.39577
ZNF212	-1.65255	6.08013	-4.08566	0.0093069	0.0860956	-2.39719
PTF1A	2.45681	6.75734	4.08541	0.00930923	0.0860956	-2.39746
CDC42BPG	-1.36856	6.58707	-4.08173	0.00934306	0.0862586	-2.40136
BARX1	-1.04739	5.02136	-4.07965	0.00936231	0.0863116	-2.40357
METTL1	-1.10972	9.14164	-4.07907	0.00936767	0.0863116	-2.40418
C10orf111	-1.13737	7.75125	-4.07877	0.00937042	0.0863116	-2.4045
ACCS	-1.15226	9.03227	-4.07781	0.00937933	0.0863439	-2.40552
FADS1	-1.44862	6.55581	-4.07585	0.00939756	0.0863442	-2.40761
MLLT1	-1.13872	6.97658	-4.07224	0.00943114	0.0864163	-2.41144
RIMS1	1.06444	5.41089	4.07163	0.00943684	0.0864163	-2.41209
GPR183	-1.19301	6.16384	-4.07115	0.00944129	0.0864163	-2.4126
MAGEA12	1.04526	7.12086	4.0691	0.00946047	0.0864543	-2.41478
DUSP1	-1.25924	8.21673	-4.06857	0.00946543	0.0864543	-2.41534
PLXNA4	1.04711	6.85804	4.06839	0.0094671	0.0864543	-2.41553
CDH16	-1.06985	7.10522	-4.0634	0.00951399	0.0866842	-2.42084
KIF26A	1.41697	8.28607	4.05586	0.00958536	0.087235	-2.42888
ZNF35	-1.07165	5.55045	-4.05022	0.00963912	0.0876066	-2.43489
PRR12	1.23785	5.789	4.04985	0.00964265	0.0876066	-2.43528
ADRM1	-1.22783	6.51957	-4.04549	0.00968447	0.0877177	-2.43993
PTPN9	-1.33931	7.54965	-4.04514	0.00968784	0.0877177	-2.44031
SYNE2	-1.31796	6.911	-4.04441	0.00969489	0.0877319	-2.44109
CLK1	-1.44089	5.67856	-4.04043	0.00973326	0.0880292	-2.44533
UBE2L6	-1.07088	8.31789	-4.03899	0.00974718	0.0880353	-2.44687
PRPF6	-1.2857	9.10261	-4.03865	0.00975046	0.0880353	-2.44723
WDFY3	1.02545	5.44134	4.0304	0.00983086	0.0884113	-2.45606
MARCKSL1	-1.5266	7.94267	-4.02675	0.00986658	0.088583	-2.45996
ASB10	1.09255	10.9176	4.02188	0.00991455	0.0886084	-2.46517
HTR7	1.0067	4.98106	4.02164	0.00991694	0.0886084	-2.46543
AVP	1.09035	4.93234	4.0214	0.00991933	0.0886084	-2.46569
GCHFR	-1.17171	6.76552	-4.01915	0.00994164	0.0886587	-2.46811
PTDSS1	-1.3134	9.73882	-4.01823	0.00995067	0.0886898	-2.46908
RAB19	-1.11576	6.57374	-4.01545	0.00997837	0.0888375	-2.47207
CHP1	1.02354	8.78219	4.01478	0.00998498	0.0888468	-2.47278
PROKR2	-1.1218	6.64317	-4.01101	0.0100226	0.0890823	-2.47682
THBS4	1.05223	10.4064	4.0095	0.0100377	0.0891673	-2.47845
TMEM8C	1.01404	10.4535	4.00749	0.010058	0.0892229	-2.48061
CDH6	1.18444	5.98312	4.00499	0.0100831	0.0892229	-2.4833
SFI1	1.11341	5.9458	4.00346	0.0100985	0.0893097	-2.48494
POTEA	1.03134	5.02485	3.99871	0.0101466	0.0896356	-2.49004
LDB2	-1.60671	8.31734	-3.9974	0.0101599	0.0896758	-2.49145
SND1	-1.73848	8.93507	-3.99495	0.0101848	0.0896758	-2.49409
CCDC27	-1.09746	9.14957	-3.99408	0.0101937	0.0897045	-2.49502
WDSUB1	1.3625	6.10735	3.99201	0.0102148	0.0898409	-2.49725
SYTL1	1.2218	10.1622	3.98875	0.0102482	0.0900354	-2.50076
TOLLIP	-1.37318	8.75718	-3.98786	0.0102573	0.0900562	-2.50171
VCP	-1.20064	11.8599	-3.98688	0.0102674	0.0900562	-2.50277
CTPS2	-1.03096	5.9502	-3.98438	0.0102932	0.0900562	-2.50547
YWHAH	-2.47247	8.6935	-3.98415	0.0102955	0.0900562	-2.50571
CAND2	-1.14598	6.80487	-3.98333	0.010304	0.0900562	-2.50659
WDR13	-1.44722	7.29477	-3.98304	0.0103069	0.0900562	-2.5069
FZD2	1.097	10.5613	3.97787	0.0103605	0.0903244	-2.51248
CHRNA10	-1.39288	5.44388	-3.97673	0.0103724	0.0903244	-2.51371
ZNF804B	-1.03468	6.22316	-3.9764	0.0103758	0.0903244	-2.51407
WWC3	-1.02659	5.33577	-3.97555	0.0103847	0.0903244	-2.51499
FKBP1A	-1.82912	11.1167	-3.97423	0.0103985	0.0903244	-2.51641
MYH3	1.04785	6.26379	3.97409	0.0103999	0.0903244	-2.51655
RCN3	-1.42321	6.43781	-3.97344	0.0104067	0.0903244	-2.51726
HOGA1	1.39568	8.66236	3.97312	0.01041	0.0903244	-2.5176
SPTAN1	-1.72706	6.86225	-3.96898	0.0104534	0.0903964	-2.52208
C19orf52	1.08007	5.58238	3.96554	0.0104896	0.0904253	-2.52579
SMN1	1.42208	7.07235	3.96537	0.0104914	0.0904253	-2.52598
CD40	-1.05204	8.70371	-3.96261	0.0105205	0.0904998	-2.52896
RBM3	-1.07619	8.62987	-3.96253	0.0105213	0.0904998	-2.52904
P4HA3	-1.33856	8.67833	-3.96042	0.0105437	0.0905885	-2.53133
HAO2	1.24994	6.33952	3.95925	0.0105562	0.0906468	-2.5326
PLAC1	1.20693	7.80262	3.95791	0.0105704	0.0906759	-2.53404
LRRC59	-1.08248	9.42532	-3.95636	0.0105869	0.0907076	-2.53572
SIRT2	-1.18779	7.51756	-3.95547	0.0105963	0.0907076	-2.53668
NOMO2	-1.93169	7.30599	-3.9518	0.0106356	0.0909862	-2.54065
ORAI3	-1.51618	6.32408	-3.95103	0.0106439	0.0910084	-2.54149
CYP8B1	1.0623	6.17915	3.94495	0.0107092	0.0913716	-2.54808
CALY	-1.51809	5.65657	-3.94384	0.0107212	0.0914247	-2.54928
SUSD5	1.06779	6.60481	3.94068	0.0107554	0.0915703	-2.55271
RNASEH2C	-1.17403	4.7175	-3.93687	0.0107968	0.0917757	-2.55684
YWHAZ	-1.91727	7.03822	-3.93381	0.0108302	0.0919177	-2.56016
MMP2	-1.63468	8.38397	-3.93105	0.0108605	0.0920231	-2.56316
SETD2	-1.26247	5.9634	-3.92833	0.0108903	0.0922268	-2.56611
SLC7A13	1.06874	4.94942	3.92642	0.0109114	0.0922584	-2.56819
FOXQ1	-1.0342	5.34268	-3.92441	0.0109336	0.0923546	-2.57038
PKNOX2	1.00283	4.70092	3.92382	0.0109401	0.0923546	-2.57102
SCAF8	-1.50146	5.77317	-3.92211	0.010959	0.092417	-2.57288
KDM4E	-1.27026	5.35649	-3.91806	0.011004	0.0926008	-2.57728
ENAM	-1.01913	6.03349	-3.91218	0.0110697	0.0928188	-2.58369
PLCB3	-1.36283	5.72642	-3.91035	0.0110903	0.0928188	-2.58568
ESM1	1.20174	8.40901	3.91003	0.0110939	0.0928188	-2.58603
CCDC104	-1.27678	14.3467	-3.90822	0.0111142	0.0929406	-2.588
CACNG1	-1.2217	6.87035	-3.90189	0.0111858	0.0932344	-2.59491
SERPINA9	1.29855	8.28078	3.90099	0.0111961	0.0932344	-2.59589
PRSS35	1.34573	5.32295	3.90007	0.0112065	0.0932726	-2.59689
LOC100507003	-1.60408	7.32205	-3.89872	0.0112218	0.0933032	-2.59837
EMD	-1.25257	7.48009	-3.89183	0.0113006	0.0937122	-2.60589
FAM78A	-1.15637	6.55108	-3.8911	0.011309	0.0937122	-2.60669
SLC7A4	-1.0668	8.08873	-3.89042	0.0113169	0.0937122	-2.60744
CCER1	-1.88012	7.57157	-3.89032	0.011318	0.0937122	-2.60754
PRAF2	-1.01406	5.7246	-3.88735	0.0113522	0.093947	-2.61079
PIAS4	-1.44544	6.14934	-3.88017	0.0114354	0.0944886	-2.61865
CKAP4	-2.62088	10.1486	-3.87829	0.0114573	0.0945232	-2.62071
CCDC84	-1.26881	7.42163	-3.872	0.011531	0.0949888	-2.6276
C9orf173	-1.2429	7.53192	-3.86975	0.0115575	0.0951034	-2.63007
ASPHD1	-1.20351	9.61547	-3.86341	0.0116323	0.0954246	-2.63701
ITGA5	-1.10832	9.29623	-3.86246	0.0116436	0.0954682	-2.63806
FBF1	1.01167	7.53652	3.85786	0.0116985	0.0957341	-2.64312
MAF1	-1.13526	10.2524	-3.85531	0.011729	0.0957825	-2.64592
BASP1	-1.33864	8.541	-3.8531	0.0117555	0.0958936	-2.64835
PTGDS	1.2298	5.20194	3.85234	0.0117646	0.0959186	-2.64918
PIM3	-1.09935	9.02361	-3.8515	0.0117747	0.0959188	-2.6501
ZNF772	1.00284	7.35634	3.85034	0.0117887	0.0959188	-2.65138
MTL5	1.3275	6.97212	3.84413	0.0118639	0.0963985	-2.65822
NME3	-1.14708	9.06872	-3.84397	0.0118657	0.0963985	-2.65838
GRK5	-1.02044	9.96548	-3.84104	0.0119014	0.0965213	-2.66161
SETD7	-1.0812	7.71656	-3.83755	0.011944	0.0966407	-2.66545
ANKRD11	-1.5369	8.94655	-3.83173	0.0120155	0.0967659	-2.67188
UBE2Q1	-1.17648	7.49642	-3.83079	0.012027	0.0967737	-2.67291
PHB2	-1.43327	9.52537	-3.82371	0.0121147	0.0970736	-2.68073
RHD	1.22575	7.89071	3.81955	0.0121666	0.0973084	-2.68532
TMCO4	1.04331	10.6734	3.817	0.0121985	0.0975145	-2.68814
RGL3	1.12588	11.6355	3.8151	0.0122222	0.0975877	-2.69023
MPG	-1.92007	8.14923	-3.81406	0.0122354	0.0975877	-2.69139
ACBD3	-1.09288	8.58213	-3.81072	0.0122774	0.097803	-2.69508
COL4A2	-1.19559	8.72499	-3.80461	0.0123549	0.0982732	-2.70185
ZDHHC5	1.04252	8.21661	3.80167	0.0123923	0.0983746	-2.7051
FAM116B	-1.1699	6.624	-3.79689	0.0124535	0.0984118	-2.7104
E2F3	1.43952	8.38427	3.79545	0.012472	0.0984118	-2.712
LOXL2	-1.7255	8.92625	-3.79502	0.0124775	0.0984118	-2.71247
KRTAP5-1	-1.02928	6.25223	-3.78911	0.0125538	0.0987241	-2.71903
C12orf68	1.17604	7.26453	3.78593	0.012595	0.0989513	-2.72256
TSPAN11	-1.12127	5.09169	-3.78292	0.0126342	0.099092	-2.7259
GLB1L	-1.04978	6.73256	-3.77993	0.0126733	0.099273	-2.72922
ELK3	-1.34192	8.60921	-3.77382	0.0127537	0.0996095	-2.73603
CCDC130	-1.51199	7.97671	-3.77166	0.0127822	0.0997345	-2.73843
IGFBP2	-1.65125	8.3075	-3.76637	0.0128523	0.100086	-2.74431
DNAJC12	1.17657	7.56255	3.76456	0.0128764	0.100176	-2.74633
PECR	1.01598	8.19007	3.76353	0.0128901	0.100185	-2.74747
FPR1	2.29637	9.60723	3.75967	0.0129419	0.10049	-2.75178
RANGAP1	-1.73472	7.35181	-3.75651	0.0129843	0.100721	-2.75531
ZNF398	-1.151	8.98161	-3.75433	0.0130136	0.100802	-2.75774
OR2B11	1.19892	9.16214	3.75007	0.0130713	0.101108	-2.7625
GP9	-1.04574	5.68138	-3.7496	0.0130776	0.101108	-2.76302
POLR2E	-1.00662	9.93821	-3.74383	0.0131562	0.101421	-2.76946
ALKBH2	-1.00613	6.43213	-3.74005	0.0132081	0.101569	-2.77369
TNFAIP1	-1.69198	9.00575	-3.7382	0.0132334	0.101715	-2.77575
REXO4	-1.2849	7.79651	-3.7351	0.0132761	0.101841	-2.77922
UBR5	-1.27398	5.83234	-3.73042	0.013341	0.1021	-2.78446
FBXL16	-1.14785	5.35148	-3.72219	0.0134557	0.102312	-2.79368
PDZD11	-1.08638	8.62668	-3.71555	0.0135492	0.102684	-2.80113
SULT1C3	1.10427	7.08427	3.70687	0.0136726	0.103257	-2.81088
FZD6	-1.05673	7.38928	-3.70684	0.013673	0.103257	-2.81091
OR7G2	1.06574	8.36358	3.70637	0.0136797	0.103257	-2.81144
PSMD5	-1.13102	7.72564	-3.70188	0.013744	0.103595	-2.81648
KDELR1	-1.23726	9.03327	-3.69985	0.0137732	0.103649	-2.81877
LTBP2	-1.95498	8.37202	-3.69926	0.0137816	0.103649	-2.81943
KLHL18	-1.01984	5.63516	-3.69831	0.0137954	0.103649	-2.82051
POLR3D	-1.04552	5.09024	-3.69807	0.0137989	0.103649	-2.82077
P2RY2	1.00354	5.93635	3.69733	0.0138095	0.103649	-2.8216
GGTLC1	-1.21844	6.45125	-3.69555	0.0138353	0.103724	-2.82361
CHST15	-1.20708	8.01838	-3.69036	0.0139106	0.104017	-2.82945
POU3F1	1.01305	10.7096	3.68787	0.0139469	0.10417	-2.83226
LTN1	-1.09403	6.76004	-3.67987	0.0140644	0.104476	-2.84128
UBTF	-1.21566	6.47133	-3.67948	0.0140701	0.104476	-2.84172
KRT9	1.09034	4.50028	3.67905	0.0140765	0.104476	-2.84221
CTAGE4	1.71212	10.9506	3.67352	0.0141583	0.104913	-2.84844
SIAH2	-1.02148	7.53176	-3.67328	0.0141619	0.104913	-2.84871
REEP6	1.01171	6.68541	3.66978	0.014214	0.105093	-2.85266
FAM89A	-1.07571	10.8809	-3.6649	0.0142871	0.105401	-2.85818
TMEM14E	1.70137	8.35876	3.65837	0.0143856	0.105883	-2.86557
ACRC	1.03788	6.61618	3.65837	0.0143856	0.105883	-2.86557
CCL24	-1.33404	5.19121	-3.6534	0.014461	0.106292	-2.8712
SGSH	1.23063	8.87369	3.64849	0.014536	0.106548	-2.87676
B3GNT1	-1.07974	8.41725	-3.64429	0.0146005	0.106776	-2.88152
CHRNG	1.10325	5.74363	3.64175	0.0146395	0.106866	-2.8844
MED14	-1.98528	5.70839	-3.63474	0.0147482	0.107295	-2.89236
GRIK5	2.25084	5.9765	3.6345	0.014752	0.107295	-2.89263
RTN4RL1	1.9206	9.64799	3.62957	0.0148289	0.107433	-2.89823
FOXA2	1.38121	5.40757	3.62449	0.0149088	0.107505	-2.90401
GMDS	-1.25141	6.36754	-3.62271	0.0149369	0.107602	-2.90604
ABCC8	-1.11957	5.72665	-3.62247	0.0149407	0.107602	-2.90631
MRPL10	-1.30474	7.94101	-3.62235	0.0149425	0.107602	-2.90644
DAB2	-1.04268	11.2537	-3.62032	0.0149747	0.107689	-2.90875
PRAMEF7	-1.28378	7.93315	-3.61716	0.0150248	0.108	-2.91235
PCGF2	-1.13847	8.03336	-3.60647	0.0151959	0.108818	-2.92452
CCDC102A	-1.9924	6.01921	-3.6061	0.0152019	0.108818	-2.92495
MKRN2	-1.14618	7.96969	-3.60033	0.0152952	0.109158	-2.93153
EXTL1	2.23959	6.14791	3.59901	0.0153166	0.109164	-2.93304
COCH	2.25476	6.15048	3.59821	0.0153297	0.109209	-2.93395
SPINT1	-1.01246	6.64442	-3.59583	0.0153684	0.109293	-2.93667
SPSB3	-1.02482	8.78678	-3.59352	0.0154061	0.109363	-2.9393
AGXT2	-1.71403	6.33745	-3.59293	0.0154159	0.109365	-2.93998
LRRIQ1	-1.09895	8.56854	-3.59084	0.0154501	0.109529	-2.94237
CPSF6	-1.20296	8.90079	-3.58842	0.0154899	0.109576	-2.94514
DPPA2	-1.1007	8.6796	-3.58784	0.0154994	0.109576	-2.9458
VPS4A	-1.1493	8.82101	-3.58287	0.0155816	0.109779	-2.95149
NR1H3	-1.03172	6.38219	-3.57976	0.0156333	0.109961	-2.95505
CNOT6L	2.53688	6.14193	3.57707	0.015678	0.110103	-2.95812
ZFYVE1	-1.18364	6.78837	-3.57388	0.0157313	0.110183	-2.96177
KDR	-2.19331	8.85036	-3.573	0.0157461	0.110183	-2.96278
LOX	-1.22474	10.751	-3.57057	0.0157869	0.110291	-2.96557
TEX10	-1.30354	5.235	-3.56962	0.0158029	0.110291	-2.96665
IGSF10	-1.28594	5.85031	-3.56745	0.0158395	0.11044	-2.96914
TRAF3IP2	-1.03034	7.68874	-3.56694	0.0158482	0.11044	-2.96974
LYN	-1.09047	7.24238	-3.56599	0.0158642	0.110449	-2.97082
DTX3L	1.89364	5.79108	3.56563	0.0158703	0.110449	-2.97123
LZTR1	-1.45203	5.28084	-3.56197	0.0159324	0.110683	-2.97543
ZNF580	-1.18842	13.6899	-3.55408	0.0160671	0.111333	-2.98449
TRA2A	1.64599	6.83483	3.55153	0.016111	0.111534	-2.98742
AP5S1	-1.16563	6.26197	-3.55043	0.0161299	0.111534	-2.98868
SCG5	1.2502	7.65154	3.54687	0.0161914	0.11171	-2.99278
GBA	-1.02995	8.48046	-3.54177	0.01628	0.112031	-2.99865
ZNF385A	-1.11598	6.71563	-3.54076	0.0162976	0.112068	-2.99981
CSGALNACT2	-1.15874	6.77719	-3.53733	0.0163576	0.112178	-3.00376
RHOJ	-1.05466	12.6405	-3.53392	0.0164175	0.112541	-3.00769
PINK1	-1.2859	7.09347	-3.53249	0.0164427	0.112568	-3.00934
ZNF792	1.09181	9.29463	3.52899	0.0165045	0.112617	-3.01337
PEAR1	-1.75895	7.85244	-3.52809	0.0165203	0.112617	-3.0144
EHD4	-1.39994	7.94235	-3.52641	0.0165502	0.112725	-3.01635
ARHGAP22	-1.06099	8.03624	-3.52064	0.0166529	0.113232	-3.023
HIBADH	-1.08492	8.58335	-3.51562	0.016743	0.113521	-3.0288
SNX8	-1.38613	7.66226	-3.51309	0.0167885	0.113766	-3.03172
SDC1	1.03678	5.21327	3.50865	0.0168689	0.114048	-3.03685
NGFR	1.38805	9.06996	3.50763	0.0168873	0.114048	-3.03803
CSF2	1.58342	9.60256	3.50005	0.0170257	0.114669	-3.0468
FBXW4	1.50409	8.41428	3.49984	0.0170295	0.114669	-3.04704
UBTD1	-1.27754	8.43198	-3.49734	0.0170754	0.114833	-3.04994
LEPRE1	-1.05694	9.45272	-3.49251	0.0171646	0.115098	-3.05554
PLIN3	-1.45845	8.48102	-3.49247	0.0171653	0.115098	-3.05558
2019-03-07	-1.61874	5.612	-3.48678	0.017271	0.115448	-3.06218
CCNY	-1.64	7.66872	-3.48672	0.017272	0.115448	-3.06225
SGIP1	-1.05535	10.1899	-3.48561	0.0172928	0.115468	-3.06354
DNAJC3	1.56239	10.0893	3.478	0.0174355	0.11602	-3.07237
TMEM55A	-1.09245	7.77861	-3.47774	0.0174404	0.11602	-3.07268
SPRYD3	-1.17235	5.81597	-3.4696	0.0175945	0.116579	-3.08213
UBXN6	-1.15356	8.27197	-3.46943	0.0175978	0.116579	-3.08234
KIFC3	-1.29007	6.29883	-3.4679	0.0176269	0.116724	-3.08411
USP5	-1.24315	6.51935	-3.46638	0.0176559	0.116729	-3.08588
PPP1R12C	-1.56417	5.46122	-3.46614	0.0176605	0.116729	-3.08616
FOSL2	-1.03111	6.38952	-3.46394	0.0177025	0.116837	-3.08871
CER1	1.52365	5.23782	3.46103	0.0177585	0.116916	-3.09211
CC2D1A	-1.16868	5.36578	-3.45928	0.0177922	0.117042	-3.09415
UPF1	-1.04561	5.41609	-3.45485	0.0178778	0.117123	-3.0993
AP1B1	-1.07458	7.99731	-3.45484	0.0178779	0.117123	-3.09931
HN1L	-1.08674	9.86664	-3.45244	0.0179244	0.11738	-3.1021
COPA	-1.11274	9.29561	-3.45089	0.0179546	0.117519	-3.10391
PARPBP	1.39513	5.89026	3.44772	0.0180165	0.117654	-3.10761
PRPF8	-1.40871	9.80796	-3.42995	0.0183678	0.118852	-3.12837
MVD	-1.31284	8.64661	-3.42849	0.018397	0.118852	-3.13007
TFPI	1.67216	13.0908	3.41897	0.0185885	0.119475	-3.1412
LAMTOR1	-1.21534	11.6767	-3.41535	0.0186622	0.119756	-3.14545
CDCA4	-1.17149	6.44154	-3.40794	0.0188136	0.120368	-3.15413
AP2A2	-1.37227	10.5479	-3.40773	0.0188178	0.120368	-3.15438
PCBP2	-1.40811	12.4376	-3.40329	0.0189094	0.120569	-3.15959
POLR3A	-1.0033	7.26127	-3.40192	0.0189376	0.12065	-3.16119
ZNF595	1.37976	10.9966	3.40104	0.0189558	0.120671	-3.16223
LENG1	-1.34892	5.74689	-3.39656	0.0190488	0.121118	-3.16748
NAA60	1.09271	5.52857	3.39091	0.0191669	0.121525	-3.17412
EIF4G3	-1.10063	6.89568	-3.38831	0.0192216	0.12159	-3.17719
CSNK1A1L	3.27183	9.75983	3.38558	0.019279	0.121756	-3.18039
SMARCAL1	-1.19068	7.42704	-3.38546	0.0192817	0.121756	-3.18054
CD151	-1.00923	8.84013	-3.38487	0.019294	0.121756	-3.18122
UFM1	1.13568	12.5278	3.38108	0.0193743	0.12207	-3.18569
CDC42EP5	-1.19372	7.50246	-3.3778	0.0194442	0.12222	-3.18955
TTYH3	1.70726	9.19064	3.37621	0.0194781	0.122386	-3.19142
MFGE8	-1.21232	8.37017	-3.37477	0.0195087	0.12253	-3.19311
HGSNAT	-1.41667	5.3647	-3.37176	0.0195733	0.122646	-3.19666
C2orf27B	-1.10018	6.89876	-3.36926	0.019627	0.122861	-3.1996
IRAK1	-1.25002	6.51422	-3.36909	0.0196306	0.122861	-3.1998
TWF2	-1.46002	9.64442	-3.35851	0.0198602	0.12385	-3.21229
UBN1	-1.36398	9.75366	-3.35498	0.0199375	0.124132	-3.21646
FAM211B	-1.36674	5.8922	-3.35421	0.0199544	0.124157	-3.21737
MERTK	-1.8316	6.76757	-3.33526	0.0203752	0.125796	-3.23978
PLCD3	1.09479	8.3786	3.33475	0.0203867	0.125818	-3.24039
ISX	-1.01207	7.08242	-3.33317	0.0204221	0.125929	-3.24225
RAB6B	-1.05462	6.8695	-3.33083	0.020475	0.125973	-3.24503
RPL13	-1.18305	12.8544	-3.32819	0.0205348	0.126131	-3.24816
COX8C	1.3025	6.51872	3.32773	0.0205452	0.126131	-3.2487
MAP2K1	-1.3418	8.629	-3.32664	0.0205698	0.126177	-3.24999
ATP5D	-1.07698	8.13616	-3.32658	0.0205712	0.126177	-3.25006
SUOX	2.36225	8.94537	3.32356	0.02064	0.126386	-3.25364
PKIG	-1.03839	11.0295	-3.32179	0.0206804	0.126506	-3.25574
RPL8	-1.07072	12.3309	-3.31838	0.0207586	0.126821	-3.25979
RRP1	-1.31409	7.77968	-3.31705	0.0207891	0.126848	-3.26137
NSUN2	-1.37391	7.1734	-3.31385	0.0208629	0.127011	-3.26518
FAM170B	-1.20135	4.896	-3.31236	0.0208973	0.127011	-3.26694
B3GNT2	-1.8714	6.19741	-3.31191	0.0209076	0.127011	-3.26748
OTOP2	2.80563	7.22153	3.30537	0.0210596	0.127477	-3.27525
GLTPD2	2.22986	10.8858	3.30232	0.0211307	0.127742	-3.27887
GBF1	-1.19039	7.86695	-3.302	0.0211383	0.127742	-3.27926
OR1I1	-1.13502	5.6802	-3.29938	0.0211998	0.127897	-3.28237
LTB4R2	1.02727	11.8246	3.29822	0.021227	0.127987	-3.28375
SGK110	-1.24162	5.22094	-3.29735	0.0212477	0.127991	-3.28479
AP1S3	1.29293	5.93323	3.29717	0.0212518	0.127991	-3.285
WDR73	-1.0521	7.0964	-3.29428	0.02132	0.128234	-3.28844
DDAH2	-1.3802	10.6914	-3.29096	0.0213988	0.12849	-3.2924
SYN3	-1.1308	7.98519	-3.28905	0.0214442	0.128617	-3.29467
PRRG4	1.99789	6.64708	3.28712	0.0214902	0.128654	-3.29697
WTIP	-1.29425	6.2721	-3.28591	0.0215189	0.128775	-3.29841
FKBP15	-1.0875	8.57266	-3.27582	0.0217618	0.1295	-3.31045
KIFAP3	-1.0348	8.14554	-3.27535	0.0217732	0.12952	-3.31101
LYL1	-1.2575	8.81171	-3.27346	0.0218189	0.129696	-3.31326
CNN3	-1.58071	6.64243	-3.27018	0.0218988	0.12988	-3.31718
PRKCH	-1.71408	8.26123	-3.26585	0.0220045	0.130221	-3.32235
MSN	-2.83952	9.49816	-3.26339	0.0220651	0.130431	-3.3253
JAM3	-1.11963	5.50871	-3.26266	0.0220829	0.130487	-3.32616
SLC25A24	-1.23749	6.2746	-3.26206	0.0220979	0.130508	-3.32689
OR9Q1	1.06753	5.92496	3.26186	0.0221027	0.130508	-3.32713
UQCRB	1.09805	7.73799	3.25683	0.0222271	0.130952	-3.33314
TUBGCP2	-1.3591	5.77693	-3.25562	0.022257	0.131032	-3.33459
HHEX	-1.03096	10.4332	-3.25442	0.0222867	0.131158	-3.33602
EDN1	-1.1695	14.1113	-3.25218	0.0223426	0.131439	-3.33871
NRP2	-1.14497	7.07894	-3.24823	0.0224414	0.131627	-3.34344
AKT1S1	1.0854	9.15459	3.24707	0.0224705	0.131636	-3.34483
TCF21	-1.10963	7.71371	-3.24252	0.022585	0.132015	-3.35028
ACO2	-1.03573	9.73057	-3.2394	0.0226639	0.132257	-3.35402
QARS	-1.31433	13.1025	-3.23815	0.0226955	0.132345	-3.35551
OXNAD1	1.1022	10.8342	3.23729	0.0227175	0.132372	-3.35655
CAPN2	-1.92673	9.84253	-3.23285	0.0228305	0.132713	-3.36188
PCDHGA5	-1.10977	6.35175	-3.22835	0.0229459	0.133051	-3.36728
CNGA4	1.02035	7.93693	3.22699	0.0229809	0.133086	-3.36892
RAET1E	1.27848	7.12032	3.22291	0.0230861	0.133519	-3.37381
UCK2	-2.25002	8.36756	-3.2201	0.023159	0.133607	-3.37719
C16orf91	-1.02203	5.19045	-3.21946	0.0231756	0.133632	-3.37796
TMEM189	-1.04637	8.4923	-3.21562	0.0232755	0.133978	-3.38257
ULK1	1.32655	8.32506	3.21555	0.0232775	0.133978	-3.38266
RIPPLY1	1.38113	6.52023	3.20862	0.0234592	0.134756	-3.391
PTGS2	-1.03424	6.83833	-3.20822	0.0234696	0.134756	-3.39148
HEG1	1.19843	5.41026	3.19925	0.0237076	0.135523	-3.40229
KRT8	1.06805	11.583	3.1988	0.0237195	0.135523	-3.40283
CDHR3	-1.28542	5.74805	-3.19832	0.0237323	0.135523	-3.40341
HGFAC	1.0008	7.61045	3.19635	0.0237851	0.135629	-3.40579
COBRA1	-1.39823	9.406	-3.19216	0.0238973	0.135886	-3.41083
SOD3	-1.06032	4.91836	-3.19138	0.0239184	0.135886	-3.41178
LOC730159	1.37336	7.48696	3.1813	0.0241915	0.136674	-3.42395
GRN	-1.10175	13.4424	-3.17951	0.0242404	0.136841	-3.42611
PCYT1A	-1.01894	6.67391	-3.1793	0.0242463	0.136841	-3.42637
COL9A1	1.00753	7.88288	3.17756	0.0242939	0.136868	-3.42847
IDH1	-1.78798	11.1184	-3.17279	0.024425	0.137401	-3.43424
MIEN1	-1.22324	9.38476	-3.17256	0.0244314	0.137401	-3.43452
LGALS1	-1.0257	17.1123	-3.16961	0.0245127	0.137682	-3.43808
CTCF	-1.37944	7.80992	-3.16898	0.0245303	0.137682	-3.43885
SULT1A3	1.06943	11.8057	3.16887	0.0245332	0.137682	-3.43897
C12orf75	-1.09862	5.06649	-3.16772	0.0245652	0.137765	-3.44037
SRA1	-1.15494	6.51703	-3.16397	0.0246695	0.138302	-3.44491
HCRTR1	1.24358	8.48442	3.1611	0.0247497	0.138557	-3.44839
CTAGE9	2.09958	10.1538	3.15678	0.0248709	0.139055	-3.45362
BMX	1.66845	6.61458	3.15516	0.0249164	0.139148	-3.45558
GLTSCR2	-1.27809	10.1621	-3.15198	0.0250062	0.139389	-3.45943
TRIM68	-1.08337	6.44909	-3.15135	0.0250242	0.139389	-3.4602
SNAP47	-1.21328	8.84239	-3.15107	0.0250321	0.139389	-3.46054
SIN3B	1.11073	7.03797	3.14859	0.0251024	0.139599	-3.46354
FOXK1	-1.07891	5.84602	-3.145	0.0252049	0.13969	-3.46791
PTDSS2	-1.02847	7.23754	-3.13459	0.0255041	0.140419	-3.48054
SPIN1	1.3566	7.88754	3.13328	0.025542	0.140481	-3.48213
FLOT2	-1.16789	5.89934	-3.13289	0.0255532	0.140494	-3.4826
IL1A	1.34632	6.78507	3.1317	0.025588	0.140589	-3.48406
MSGN1	-1.27303	6.1732	-3.12743	0.0257121	0.141076	-3.48924
DAPK2	-1.02789	7.15451	-3.12209	0.0258687	0.141695	-3.49574
LIPH	1.08271	5.81577	3.12117	0.0258958	0.141695	-3.49686
MVP	-1.16137	5.13911	-3.11847	0.0259754	0.141887	-3.50014
IFNE	1.25468	8.1664	3.11796	0.0259906	0.141903	-3.50077
STOM	-1.38963	6.22832	-3.11728	0.0260107	0.141903	-3.5016
MRPS27	-1.31191	10.0253	-3.11591	0.026051	0.142001	-3.50326
MYC	-1.55807	10.0775	-3.10826	0.0262791	0.142679	-3.51259
KCNAB3	-1.31926	6.92552	-3.10771	0.0262954	0.142679	-3.51325
EIF2AK4	-1.52156	5.62371	-3.10409	0.0264042	0.142851	-3.51767
KIAA1549L	-1.09076	5.74555	-3.10356	0.0264201	0.142851	-3.51832
ATG4D	-1.15168	5.24632	-3.10191	0.02647	0.142927	-3.52033
TMEM8A	1.00923	14.6558	3.10096	0.0264986	0.142996	-3.52149
SNRNP70	-1.29852	8.70254	-3.10089	0.0265006	0.142996	-3.52157
SAFB	-1.29819	8.61208	-3.09947	0.0265436	0.143083	-3.5233
GPANK1	-1.40937	7.1992	-3.09384	0.0267147	0.143617	-3.53018
MPV17L2	-1.06517	7.31774	-3.08956	0.0268454	0.143884	-3.5354
SLTM	-1.04849	7.35915	-3.08675	0.0269319	0.144154	-3.53884
MTRNR2L10	1.35542	11.9493	3.08247	0.0270638	0.144545	-3.54407
ZNF514	-1.03252	6.63512	-3.08163	0.0270897	0.144545	-3.54509
RPS8	-1.23199	15.2416	-3.08043	0.027127	0.144548	-3.54656
HIST1H3E	1.13548	6.60859	3.07649	0.0272497	0.144932	-3.55139
ZNF76	-1.28847	7.52299	-3.07148	0.0274063	0.145411	-3.55752
RFTN1	-1.10287	8.45041	-3.06777	0.0275229	0.145531	-3.56206
MCM7	-1.03141	9.19272	-3.06737	0.0275353	0.145531	-3.56254
LPA	-1.25879	6.63725	-3.06	0.0277689	0.146281	-3.57157
TSTA3	-1.04711	8.92257	-3.05351	0.0279764	0.146778	-3.57953
ALDOA	-1.24316	10.3839	-3.0503	0.0280798	0.147094	-3.58348
EPHA4	-1.08322	6.79035	-3.04256	0.0283307	0.147811	-3.59299
LOC729020	1.83772	6.02513	3.0418	0.0283553	0.147811	-3.59391
MBTPS1	-1.23469	7.43661	-3.04173	0.0283575	0.147811	-3.594
SMPDL3B	-1.06834	7.85189	-3.04003	0.0284132	0.148015	-3.59609
PLD2	-1.14662	8.25365	-3.03974	0.0284224	0.148015	-3.59644
UBE2T	1.23822	12.0557	3.03655	0.0285269	0.148256	-3.60036
CYTH2	-1.13762	11.8093	-3.01729	0.0291668	0.149888	-3.62406
USHBP1	-1.04316	5.57212	-3.01646	0.0291949	0.149984	-3.62509
SDF4	-1.10275	10.2553	-3.0149	0.0292475	0.15017	-3.62701
GUK1	-1.06443	8.62277	-3.01468	0.0292548	0.15017	-3.62728
GNAQ	-1.08971	6.40214	-3.01367	0.0292891	0.150178	-3.62853
BANF2	1.92121	6.32215	3.00503	0.0295825	0.151198	-3.63918
LRP4	1.04124	7.07031	3.0025	0.0296693	0.151288	-3.64231
NCAPH2	-1.00907	6.62394	-3.00123	0.0297129	0.151288	-3.64388
PLOD1	-1.57186	9.30533	-2.99582	0.0298993	0.151797	-3.65056
RNASEL	-1.28537	5.20509	-2.99541	0.0299134	0.15182	-3.65106
PGAM4	1.64091	15.5716	2.99468	0.0299385	0.151851	-3.65196
SUPT16H	-1.16146	8.62637	-2.98467	0.0302876	0.152748	-3.66433
ALOX12	-1.05959	7.62992	-2.98313	0.0303418	0.152879	-3.66624
POU5F1B	1.12718	6.48933	2.98284	0.0303519	0.152879	-3.66659
SNX17	-1.13475	10.0809	-2.98012	0.0304476	0.153072	-3.66996
PACSIN2	-1.19113	8.86806	-2.97447	0.0306477	0.153444	-3.67694
DNAJC19	1.60873	11.5545	2.97423	0.0306562	0.153444	-3.67724
PVRL2	-1.03526	7.68253	-2.96939	0.0308291	0.153972	-3.68324
FBXL7	-1.05251	4.81879	-2.96829	0.0308684	0.154024	-3.6846
ITGA6	-1.89261	10.737	-2.9667	0.0309253	0.154115	-3.68657
ADRB1	1.29268	7.30713	2.96272	0.0310688	0.154541	-3.69151
RNF19A	-1.38973	6.98339	-2.95534	0.0313365	0.15505	-3.70066
SLFNL1	1.10782	8.72125	2.95467	0.0313608	0.15505	-3.70149
CCIN	1.26962	8.77794	2.9522	0.0314509	0.155364	-3.70455
ZNF563	1.06613	8.17417	2.9472	0.0316346	0.155581	-3.71076
NOL6	-1.04421	6.79053	-2.94557	0.0316948	0.155619	-3.71279
RAP2C	-1.12922	6.09353	-2.94383	0.0317591	0.155791	-3.71495
ACBD5	1.27848	7.7921	2.9389	0.031942	0.1564	-3.72107
KYNU	1.26588	6.06011	2.93742	0.0319969	0.156573	-3.7229
ATP6V0C	-1.37715	8.13825	-2.92327	0.0325298	0.158272	-3.74051
DHCR7	-1.1333	7.68135	-2.91989	0.0326586	0.158645	-3.74472
BEX5	1.02839	8.73747	2.9177	0.0327421	0.158954	-3.74745
EPB41L2	-1.55964	5.84547	-2.91699	0.0327695	0.15899	-3.74833
KBTBD10	1.03605	6.16593	2.91554	0.0328248	0.159161	-3.75013
GID8	-1.32923	6.64011	-2.90542	0.0332159	0.159845	-3.76275
LRRC32	1.22051	8.96785	2.90435	0.0332575	0.1599	-3.76409
ATP10A	1.02204	5.85899	2.89945	0.0334489	0.160493	-3.7702
ADAM18	1.19786	5.62215	2.89705	0.033543	0.160716	-3.77319
LMF2	-1.04955	5.94341	-2.89063	0.0337966	0.16152	-3.78121
BTG2	-1.47748	7.57874	-2.89004	0.0338202	0.161536	-3.78195
EXD2	-1.20893	7.43371	-2.88762	0.0339162	0.161704	-3.78497
SPANXN2	1.76417	5.9587	2.88683	0.0339476	0.161718	-3.78596
PGBD4	1.10995	8.13159	2.88653	0.0339595	0.161718	-3.78633
ARF5	-1.30425	12.1867	-2.87573	0.0343929	0.162567	-3.79984
GTPBP6	-1.01147	7.00296	-2.87569	0.0343946	0.162567	-3.79989
FOXC2	-1.43029	6.5857	-2.87559	0.0343988	0.162567	-3.80002
CKB	-1.12248	4.94782	-2.87234	0.0345304	0.162886	-3.80408
ACE	1.00629	7.46884	2.87128	0.0345736	0.16299	-3.80541
CCDC83	2.54744	12.189	2.86815	0.034701	0.163398	-3.80933
FTHL17	1.47268	8.48504	2.86569	0.0348017	0.163679	-3.81241
IER3	-1.03591	9.56013	-2.85893	0.0350794	0.164307	-3.82087
SNAPIN	-1.03276	10.1922	-2.84553	0.0356382	0.165726	-3.83768
KIAA0930	-1.56996	7.00499	-2.84478	0.0356697	0.16576	-3.83862
FOXS1	1.13191	7.70842	2.84036	0.0358562	0.166108	-3.84416
MTRNR2L8	1.01388	10.4723	2.83926	0.0359028	0.166108	-3.84555
PSMB2	-1.01446	12.0149	-2.83386	0.0361326	0.166554	-3.85233
C1orf227	1.00835	5.91806	2.82464	0.0365286	0.167536	-3.86392
MCM2	1.06843	6.11072	2.82306	0.0365968	0.167678	-3.8659
PRDX6	-1.13377	13.1627	-2.8217	0.0366558	0.167804	-3.86761
RETSAT	-1.03747	5.81605	-2.81921	0.0367641	0.167952	-3.87075
GSDMD	-1.14274	8.82803	-2.81891	0.0367773	0.167952	-3.87113
PIAS2	1.37334	9.82318	2.81008	0.0371638	0.168823	-3.88223
FOXK2	-1.05564	8.65236	-2.81	0.0371673	0.168823	-3.88234
MTMR14	-1.00409	8.83994	-2.80984	0.0371744	0.168823	-3.88254
C19orf60	-1.02691	8.33507	-2.80456	0.0374079	0.169449	-3.88919
CCNG1	-1.29315	9.84967	-2.80129	0.0375535	0.169728	-3.89332
CTGF	-1.06337	15.2206	-2.79593	0.0377928	0.170276	-3.90006
PFN1	-1.62314	12.6735	-2.7929	0.0379294	0.170606	-3.9039
LOC554223	1.3852	11.8384	2.78946	0.0380847	0.171108	-3.90823
DACH1	-1.06085	10.3964	-2.7875	0.0381734	0.17141	-3.9107
CEBPD	1.84225	12.8682	2.77724	0.038642	0.172641	-3.92365
HOMER3	-1.08334	12.2384	-2.77602	0.0386983	0.172711	-3.9252
CXCL6	1.08221	8.23865	2.77333	0.0388226	0.17306	-3.9286
ASCL4	2.61969	6.27626	2.76777	0.0390802	0.173752	-3.93562
PPAP2B	-1.11112	9.44185	-2.76606	0.0391603	0.173838	-3.93779
SOCS5	1.28494	9.05245	2.75576	0.0396442	0.175013	-3.95082
IL8	1.09953	12.055	2.75535	0.0396633	0.175049	-3.95133
FSCN1	-1.92227	5.90152	-2.75357	0.0397479	0.17518	-3.95359
DYNLT1	-1.15452	8.24659	-2.75261	0.0397935	0.175236	-3.9548
TRMT2A	-1.5445	7.76929	-2.73999	0.0403979	0.176899	-3.97078
TMEM98	-1.00814	11.5596	-2.73966	0.040414	0.176899	-3.97121
ZNF461	1.96986	6.18	2.73868	0.0404615	0.176899	-3.97245
ZNF420	1.49199	9.16509	2.73781	0.0405037	0.176997	-3.97356
C19orf73	1.91698	8.42245	2.73681	0.040552	0.177076	-3.97482
RPRD2	1.08053	7.07139	2.73675	0.040555	0.177076	-3.9749
CCNJL	-1.39289	5.71573	-2.73282	0.0407462	0.177636	-3.97988
BMI1	-1.19282	6.39287	-2.73274	0.0407499	0.177636	-3.97998
FSTL1	-1.7606	10.1079	-2.72959	0.0409036	0.178014	-3.98397
PGF	-1.58632	10.5888	-2.72229	0.0412629	0.178909	-3.99323
DNAJC13	-2.18514	7.73697	-2.72195	0.0412798	0.17892	-3.99367
LRRC47	-1.53085	6.53285	-2.72121	0.0413167	0.178935	-3.99461
USP36	-1.16434	5.44993	-2.71906	0.0414231	0.179104	-3.99734
ZNF267	1.2371	10.9297	2.71823	0.0414644	0.179137	-3.99839
RGPD8	1.80197	7.70901	2.71377	0.0416867	0.179391	-4.00406
FARSA	-1.1343	8.11112	-2.71077	0.041837	0.179677	-4.00787
MAPK1	1.01184	11.6146	2.70644	0.042055	0.180165	-4.01337
DUSP14	-1.05792	8.70569	-2.70354	0.0422017	0.180502	-4.01706
KCTD11	1.75697	11.4501	2.70316	0.0422211	0.180502	-4.01754
TCF24	1.55775	4.69399	2.69515	0.0426295	0.181481	-4.02773
ZNF696	-1.03299	7.91468	-2.69198	0.0427923	0.181774	-4.03176
CBWD2	2.08959	8.44255	2.68639	0.0430811	0.182373	-4.03888
TMEM219	-1.0631	9.86173	-2.67123	0.0438752	0.184511	-4.05819
GTF3C5	-1.1627	8.6981	-2.67096	0.0438893	0.184522	-4.05853
[truncated: 18 more rows]
