# Supplementary material for: Integrative analysis of competitive endogenous RNA network reveals the regulatory role of non-coding RNAs in high-glucose-induced human retinal endothelial cells
Source: PeerJ. 2020 Jun 29;8:e9452. doi: 10.7717/peerj.9452 (PMC7331629; doi:10.7717/peerj.9452)
Supplement: Supplemental Information 3 [file peerj-08-9452-s003.xls]

## Sheet: network
Node1	Node2	Line
MED24	hsa-miR-301b-3p	lncRNA
MED24	hsa-miR-507	lncRNA
MED24	hsa-miR-135a-5p	lncRNA
MED24	hsa-miR-184	lncRNA
MED24	hsa-miR-761	lncRNA
MED24	hsa-miR-3619-5p	lncRNA
MED24	hsa-miR-216b-5p	lncRNA
MED24	hsa-miR-217	lncRNA
MED24	hsa-miR-24-3p	lncRNA
MED24	hsa-miR-27a-3p	lncRNA
MED24	hsa-miR-107	lncRNA
MED24	hsa-miR-449c-5p	lncRNA
CLCN6	hsa-miR-301b-3p	lncRNA
CLCN6	hsa-miR-146b-5p	lncRNA
CLCN6	hsa-miR-193a-3p	lncRNA
CLCN6	hsa-miR-206	lncRNA
CLCN6	hsa-miR-613	lncRNA
CLCN6	hsa-miR-429	lncRNA
CLCN6	hsa-miR-217	lncRNA
CLCN6	hsa-miR-23b-3p	lncRNA
CLCN6	hsa-miR-24-3p	lncRNA
CLCN6	hsa-miR-27a-3p	lncRNA
CLCN6	hsa-miR-107	lncRNA
CLCN6	hsa-miR-33a-3p	lncRNA
CLCN6	hsa-miR-125a-5p	lncRNA
CLCN6	hsa-miR-125b-5p	lncRNA
CLCN6	hsa-miR-129-5p	lncRNA
BRCA1	hsa-miR-212-3p	lncRNA
BRCA1	hsa-miR-507	lncRNA
BRCA1	hsa-miR-135a-5p	lncRNA
BRCA1	hsa-miR-137	lncRNA
BRCA1	hsa-miR-139-5p	lncRNA
BRCA1	hsa-miR-140-5p	lncRNA
BRCA1	hsa-miR-876-3p	lncRNA
BRCA1	hsa-miR-146b-5p	lncRNA
BRCA1	hsa-miR-17-5p	lncRNA
BRCA1	hsa-miR-20b-5p	lncRNA
BRCA1	hsa-miR-193a-3p	lncRNA
BRCA1	hsa-miR-206	lncRNA
BRCA1	hsa-miR-613	lncRNA
BRCA1	hsa-miR-429	lncRNA
BRCA1	hsa-miR-761	lncRNA
BRCA1	hsa-miR-3619-5p	lncRNA
BRCA1	hsa-miR-216b-5p	lncRNA
BRCA1	hsa-miR-217	lncRNA
BRCA1	hsa-miR-23b-3p	lncRNA
BRCA1	hsa-miR-24-3p	lncRNA
BRCA1	hsa-miR-1297	lncRNA
BRCA1	hsa-miR-27a-3p	lncRNA
BRCA1	hsa-miR-107	lncRNA
BRCA1	hsa-miR-449c-5p	lncRNA
BRCA1	hsa-miR-125a-5p	lncRNA
BRCA1	hsa-miR-125b-5p	lncRNA
BRCA1	hsa-miR-10a-5p	lncRNA
BRCA1	hsa-miR-129-5p	lncRNA
CAPN1	hsa-miR-507	lncRNA
CAPN1	hsa-miR-139-5p	lncRNA
CAPN1	hsa-miR-140-5p	lncRNA
CAPN1	hsa-miR-876-3p	lncRNA
CAPN1	hsa-miR-142-3p	lncRNA
CAPN1	hsa-miR-193a-3p	lncRNA
CAPN1	hsa-miR-761	lncRNA
CAPN1	hsa-miR-3619-5p	lncRNA
CAPN1	hsa-miR-508-3p	lncRNA
CAPN1	hsa-miR-22-3p	lncRNA
CAPN1	hsa-miR-24-3p	lncRNA
CAPN1	hsa-miR-1297	lncRNA
CAPN1	hsa-miR-27a-3p	lncRNA
CAPN1	hsa-miR-33a-3p	lncRNA
CAPN1	hsa-miR-125a-5p	lncRNA
CAPN1	hsa-miR-125b-5p	lncRNA
CAPN1	hsa-miR-10a-5p	lncRNA
CAPN1	hsa-miR-129-5p	lncRNA
FHL1	hsa-miR-301b-3p	lncRNA
FHL1	hsa-miR-212-3p	lncRNA
FHL1	hsa-miR-507	lncRNA
FHL1	hsa-miR-146b-5p	lncRNA
FHL1	hsa-miR-429	lncRNA
FHL1	hsa-miR-761	lncRNA
FHL1	hsa-miR-3619-5p	lncRNA
FHL1	hsa-miR-508-3p	lncRNA
FHL1	hsa-miR-24-3p	lncRNA
FHL1	hsa-miR-27a-3p	lncRNA
FHL1	hsa-miR-107	lncRNA
FHL1	hsa-miR-449c-5p	lncRNA
FHL1	hsa-miR-125a-5p	lncRNA
FHL1	hsa-miR-125b-5p	lncRNA
FHL1	hsa-miR-10a-5p	lncRNA
FHL1	hsa-miR-129-5p	lncRNA
NSUN2	hsa-miR-139-5p	lncRNA
NSUN2	hsa-miR-140-5p	lncRNA
NSUN2	hsa-miR-876-3p	lncRNA
NSUN2	hsa-miR-146b-5p	lncRNA
NSUN2	hsa-miR-17-5p	lncRNA
NSUN2	hsa-miR-20b-5p	lncRNA
NSUN2	hsa-miR-193a-3p	lncRNA
NSUN2	hsa-miR-429	lncRNA
NSUN2	hsa-miR-761	lncRNA
NSUN2	hsa-miR-3619-5p	lncRNA
NSUN2	hsa-miR-216b-5p	lncRNA
NSUN2	hsa-miR-217	lncRNA
NSUN2	hsa-miR-22-3p	lncRNA
NSUN2	hsa-miR-23b-3p	lncRNA
NSUN2	hsa-miR-24-3p	lncRNA
NSUN2	hsa-miR-449c-5p	lncRNA
NSUN2	hsa-miR-125a-5p	lncRNA
NSUN2	hsa-miR-125b-5p	lncRNA
NSUN2	hsa-miR-10a-5p	lncRNA
NSUN2	hsa-miR-129-5p	lncRNA
PTGER3	hsa-miR-301b-3p	lncRNA
PTGER3	hsa-miR-212-3p	lncRNA
PTGER3	hsa-miR-507	lncRNA
PTGER3	hsa-miR-139-5p	lncRNA
PTGER3	hsa-miR-140-5p	lncRNA
PTGER3	hsa-miR-876-3p	lncRNA
PTGER3	hsa-miR-142-3p	lncRNA
PTGER3	hsa-miR-146b-5p	lncRNA
PTGER3	hsa-miR-17-5p	lncRNA
PTGER3	hsa-miR-20b-5p	lncRNA
PTGER3	hsa-miR-184	lncRNA
PTGER3	hsa-miR-193a-3p	lncRNA
PTGER3	hsa-miR-429	lncRNA
PTGER3	hsa-miR-761	lncRNA
PTGER3	hsa-miR-3619-5p	lncRNA
PTGER3	hsa-miR-216b-5p	lncRNA
PTGER3	hsa-miR-217	lncRNA
PTGER3	hsa-miR-22-3p	lncRNA
PTGER3	hsa-miR-23b-3p	lncRNA
PTGER3	hsa-miR-24-3p	lncRNA
PTGER3	hsa-miR-363-3p	lncRNA
PTGER3	hsa-miR-1297	lncRNA
PTGER3	hsa-miR-27a-3p	lncRNA
PTGER3	hsa-miR-107	lncRNA
PTGER3	hsa-miR-129-5p	lncRNA
POLR3E	hsa-miR-507	lncRNA
POLR3E	hsa-miR-146b-5p	lncRNA
POLR3E	hsa-miR-17-5p	lncRNA
POLR3E	hsa-miR-20b-5p	lncRNA
POLR3E	hsa-miR-206	lncRNA
POLR3E	hsa-miR-613	lncRNA
POLR3E	hsa-miR-429	lncRNA
POLR3E	hsa-miR-761	lncRNA
POLR3E	hsa-miR-3619-5p	lncRNA
POLR3E	hsa-miR-217	lncRNA
POLR3E	hsa-miR-508-3p	lncRNA
POLR3E	hsa-miR-22-3p	lncRNA
POLR3E	hsa-miR-23b-3p	lncRNA
POLR3E	hsa-miR-24-3p	lncRNA
POLR3E	hsa-miR-1297	lncRNA
POLR3E	hsa-miR-33a-3p	lncRNA
POLR3E	hsa-miR-449c-5p	lncRNA
POLR3E	hsa-miR-125a-5p	lncRNA
POLR3E	hsa-miR-125b-5p	lncRNA
POLR3E	hsa-miR-10a-5p	lncRNA
POLR3E	hsa-miR-129-5p	lncRNA
RPL18	hsa-miR-212-3p	lncRNA
RPL18	hsa-miR-17-5p	lncRNA
RPL18	hsa-miR-20b-5p	lncRNA
RPL18	hsa-miR-761	lncRNA
RPL18	hsa-miR-3619-5p	lncRNA
RPL18	hsa-miR-217	lncRNA
RPL18	hsa-miR-23b-3p	lncRNA
RPL18	hsa-miR-107	lncRNA
RPL18	hsa-miR-449c-5p	lncRNA
RPL18	hsa-miR-125a-5p	lncRNA
RPL18	hsa-miR-125b-5p	lncRNA
KLF6	hsa-miR-301b-3p	lncRNA
KLF6	hsa-miR-135a-5p	lncRNA
KLF6	hsa-miR-137	lncRNA
KLF6	hsa-miR-140-5p	lncRNA
KLF6	hsa-miR-876-3p	lncRNA
KLF6	hsa-miR-146b-5p	lncRNA
KLF6	hsa-miR-17-5p	lncRNA
KLF6	hsa-miR-20b-5p	lncRNA
KLF6	hsa-miR-184	lncRNA
KLF6	hsa-miR-206	lncRNA
KLF6	hsa-miR-613	lncRNA
KLF6	hsa-miR-429	lncRNA
KLF6	hsa-miR-22-3p	lncRNA
KLF6	hsa-miR-24-3p	lncRNA
KLF6	hsa-miR-363-3p	lncRNA
KLF6	hsa-miR-1297	lncRNA
KLF6	hsa-miR-27a-3p	lncRNA
KLF6	hsa-miR-449c-5p	lncRNA
KLF6	hsa-miR-129-5p	lncRNA
IP6K2	hsa-miR-301b-3p	lncRNA
IP6K2	hsa-miR-212-3p	lncRNA
IP6K2	hsa-miR-135a-5p	lncRNA
IP6K2	hsa-miR-139-5p	lncRNA
IP6K2	hsa-miR-140-5p	lncRNA
IP6K2	hsa-miR-876-3p	lncRNA
IP6K2	hsa-miR-142-3p	lncRNA
IP6K2	hsa-miR-146b-5p	lncRNA
IP6K2	hsa-miR-17-5p	lncRNA
IP6K2	hsa-miR-20b-5p	lncRNA
IP6K2	hsa-miR-193a-3p	lncRNA
IP6K2	hsa-miR-206	lncRNA
IP6K2	hsa-miR-613	lncRNA
IP6K2	hsa-miR-761	lncRNA
IP6K2	hsa-miR-3619-5p	lncRNA
IP6K2	hsa-miR-217	lncRNA
IP6K2	hsa-miR-508-3p	lncRNA
IP6K2	hsa-miR-22-3p	lncRNA
IP6K2	hsa-miR-24-3p	lncRNA
IP6K2	hsa-miR-1297	lncRNA
IP6K2	hsa-miR-27a-3p	lncRNA
IP6K2	hsa-miR-107	lncRNA
IP6K2	hsa-miR-33a-3p	lncRNA
IP6K2	hsa-miR-125a-5p	lncRNA
IP6K2	hsa-miR-125b-5p	lncRNA
IP6K2	hsa-miR-129-5p	lncRNA
FER1L4	hsa-miR-301b-3p	lncRNA
FER1L4	hsa-miR-212-3p	lncRNA
FER1L4	hsa-miR-507	lncRNA
FER1L4	hsa-miR-135a-5p	lncRNA
FER1L4	hsa-miR-139-5p	lncRNA
FER1L4	hsa-miR-140-5p	lncRNA
FER1L4	hsa-miR-876-3p	lncRNA
FER1L4	hsa-miR-184	lncRNA
FER1L4	hsa-miR-193a-3p	lncRNA
FER1L4	hsa-miR-206	lncRNA
FER1L4	hsa-miR-613	lncRNA
FER1L4	hsa-miR-761	lncRNA
FER1L4	hsa-miR-3619-5p	lncRNA
FER1L4	hsa-miR-216b-5p	lncRNA
FER1L4	hsa-miR-22-3p	lncRNA
FER1L4	hsa-miR-23b-3p	lncRNA
FER1L4	hsa-miR-24-3p	lncRNA
FER1L4	hsa-miR-363-3p	lncRNA
FER1L4	hsa-miR-1297	lncRNA
FER1L4	hsa-miR-27a-3p	lncRNA
FER1L4	hsa-miR-107	lncRNA
FER1L4	hsa-miR-33a-3p	lncRNA
FER1L4	hsa-miR-449c-5p	lncRNA
FER1L4	hsa-miR-125a-5p	lncRNA
FER1L4	hsa-miR-125b-5p	lncRNA
FER1L4	hsa-miR-10a-5p	lncRNA
FER1L4	hsa-miR-129-5p	lncRNA
P2RX7	hsa-miR-17-5p	lncRNA
P2RX7	hsa-miR-20b-5p	lncRNA
P2RX7	hsa-miR-761	lncRNA
P2RX7	hsa-miR-3619-5p	lncRNA
P2RX7	hsa-miR-216b-5p	lncRNA
P2RX7	hsa-miR-217	lncRNA
P2RX7	hsa-miR-22-3p	lncRNA
P2RX7	hsa-miR-1297	lncRNA
P2RX7	hsa-miR-27a-3p	lncRNA
P2RX7	hsa-miR-107	lncRNA
P2RX7	hsa-miR-33a-3p	lncRNA
P2RX7	hsa-miR-449c-5p	lncRNA
P2RX7	hsa-miR-129-5p	lncRNA
FUS	hsa-miR-301b-3p	lncRNA
FUS	hsa-miR-212-3p	lncRNA
FUS	hsa-miR-507	lncRNA
FUS	hsa-miR-140-5p	lncRNA
FUS	hsa-miR-876-3p	lncRNA
FUS	hsa-miR-146b-5p	lncRNA
FUS	hsa-miR-17-5p	lncRNA
FUS	hsa-miR-20b-5p	lncRNA
FUS	hsa-miR-206	lncRNA
FUS	hsa-miR-613	lncRNA
FUS	hsa-miR-761	lncRNA
FUS	hsa-miR-3619-5p	lncRNA
FUS	hsa-miR-216b-5p	lncRNA
FUS	hsa-miR-22-3p	lncRNA
FUS	hsa-miR-24-3p	lncRNA
FUS	hsa-miR-1297	lncRNA
FUS	hsa-miR-27a-3p	lncRNA
FUS	hsa-miR-33a-3p	lncRNA
FUS	hsa-miR-125a-5p	lncRNA
FUS	hsa-miR-125b-5p	lncRNA
FUS	hsa-miR-129-5p	lncRNA
DTX2	hsa-miR-507	lncRNA
DTX2	hsa-miR-137	lncRNA
DTX2	hsa-miR-146b-5p	lncRNA
DTX2	hsa-miR-761	lncRNA
DTX2	hsa-miR-3619-5p	lncRNA
DTX2	hsa-miR-216b-5p	lncRNA
DTX2	hsa-miR-217	lncRNA
DTX2	hsa-miR-22-3p	lncRNA
DTX2	hsa-miR-24-3p	lncRNA
DTX2	hsa-miR-363-3p	lncRNA
DTX2	hsa-miR-27a-3p	lncRNA
DTX2	hsa-miR-449c-5p	lncRNA
DTX2	hsa-miR-125a-5p	lncRNA
DTX2	hsa-miR-125b-5p	lncRNA
DTX2	hsa-miR-10a-5p	lncRNA
BLNK	hsa-miR-212-3p	lncRNA
BLNK	hsa-miR-135a-5p	lncRNA
BLNK	hsa-miR-146b-5p	lncRNA
BLNK	hsa-miR-206	lncRNA
BLNK	hsa-miR-613	lncRNA
BLNK	hsa-miR-761	lncRNA
BLNK	hsa-miR-3619-5p	lncRNA
BLNK	hsa-miR-217	lncRNA
BLNK	hsa-miR-508-3p	lncRNA
BLNK	hsa-miR-22-3p	lncRNA
BLNK	hsa-miR-24-3p	lncRNA
BLNK	hsa-miR-107	lncRNA
BLNK	hsa-miR-449c-5p	lncRNA
BLNK	hsa-miR-10a-5p	lncRNA
PRKY	hsa-miR-212-3p	lncRNA
PRKY	hsa-miR-135a-5p	lncRNA
PRKY	hsa-miR-137	lncRNA
PRKY	hsa-miR-139-5p	lncRNA
PRKY	hsa-miR-142-3p	lncRNA
PRKY	hsa-miR-17-5p	lncRNA
PRKY	hsa-miR-20b-5p	lncRNA
PRKY	hsa-miR-206	lncRNA
PRKY	hsa-miR-613	lncRNA
PRKY	hsa-miR-429	lncRNA
PRKY	hsa-miR-761	lncRNA
PRKY	hsa-miR-3619-5p	lncRNA
PRKY	hsa-miR-216b-5p	lncRNA
PRKY	hsa-miR-217	lncRNA
PRKY	hsa-miR-508-3p	lncRNA
PRKY	hsa-miR-23b-3p	lncRNA
PRKY	hsa-miR-24-3p	lncRNA
PRKY	hsa-miR-27a-3p	lncRNA
PRKY	hsa-miR-107	lncRNA
PRKY	hsa-miR-33a-3p	lncRNA
PRKY	hsa-miR-125a-5p	lncRNA
PRKY	hsa-miR-125b-5p	lncRNA
PRKY	hsa-miR-10a-5p	lncRNA
PRKY	hsa-miR-129-5p	lncRNA
MFNG	hsa-miR-193a-3p	lncRNA
MFNG	hsa-miR-761	lncRNA
MFNG	hsa-miR-3619-5p	lncRNA
MFNG	hsa-miR-217	lncRNA
MFNG	hsa-miR-508-3p	lncRNA
MFNG	hsa-miR-22-3p	lncRNA
MFNG	hsa-miR-23b-3p	lncRNA
MFNG	hsa-miR-24-3p	lncRNA
MFNG	hsa-miR-1297	lncRNA
MFNG	hsa-miR-27a-3p	lncRNA
MFNG	hsa-miR-107	lncRNA
MFNG	hsa-miR-125a-5p	lncRNA
MFNG	hsa-miR-125b-5p	lncRNA
MFNG	hsa-miR-10a-5p	lncRNA
SLC25A1	hsa-miR-507	lncRNA
SLC25A1	hsa-miR-206	lncRNA
SLC25A1	hsa-miR-613	lncRNA
SLC25A1	hsa-miR-217	lncRNA
SLC25A1	hsa-miR-10a-5p	lncRNA
TPTEP1	hsa-miR-301b-3p	lncRNA
TPTEP1	hsa-miR-135a-5p	lncRNA
TPTEP1	hsa-miR-137	lncRNA
TPTEP1	hsa-miR-139-5p	lncRNA
TPTEP1	hsa-miR-140-5p	lncRNA
TPTEP1	hsa-miR-876-3p	lncRNA
TPTEP1	hsa-miR-142-3p	lncRNA
TPTEP1	hsa-miR-146b-5p	lncRNA
TPTEP1	hsa-miR-17-5p	lncRNA
TPTEP1	hsa-miR-20b-5p	lncRNA
TPTEP1	hsa-miR-206	lncRNA
TPTEP1	hsa-miR-613	lncRNA
TPTEP1	hsa-miR-761	lncRNA
TPTEP1	hsa-miR-3619-5p	lncRNA
TPTEP1	hsa-miR-216b-5p	lncRNA
TPTEP1	hsa-miR-217	lncRNA
TPTEP1	hsa-miR-508-3p	lncRNA
TPTEP1	hsa-miR-22-3p	lncRNA
TPTEP1	hsa-miR-23b-3p	lncRNA
TPTEP1	hsa-miR-24-3p	lncRNA
TPTEP1	hsa-miR-1297	lncRNA
TPTEP1	hsa-miR-27a-3p	lncRNA
TPTEP1	hsa-miR-107	lncRNA
TPTEP1	hsa-miR-449c-5p	lncRNA
TPTEP1	hsa-miR-125a-5p	lncRNA
TPTEP1	hsa-miR-125b-5p	lncRNA
TPTEP1	hsa-miR-10a-5p	lncRNA
TPTEP1	hsa-miR-129-5p	lncRNA
C20orf24	hsa-miR-139-5p	lncRNA
C20orf24	hsa-miR-193a-3p	lncRNA
C20orf24	hsa-miR-24-3p	lncRNA
C20orf24	hsa-miR-1297	lncRNA
C20orf24	hsa-miR-449c-5p	lncRNA
C20orf24	hsa-miR-10a-5p	lncRNA
NOP56	hsa-miR-507	lncRNA
NOP56	hsa-miR-135a-5p	lncRNA
NOP56	hsa-miR-139-5p	lncRNA
NOP56	hsa-miR-17-5p	lncRNA
NOP56	hsa-miR-20b-5p	lncRNA
NOP56	hsa-miR-184	lncRNA
NOP56	hsa-miR-193a-3p	lncRNA
NOP56	hsa-miR-429	lncRNA
NOP56	hsa-miR-761	lncRNA
NOP56	hsa-miR-3619-5p	lncRNA
NOP56	hsa-miR-216b-5p	lncRNA
NOP56	hsa-miR-217	lncRNA
NOP56	hsa-miR-508-3p	lncRNA
NOP56	hsa-miR-22-3p	lncRNA
NOP56	hsa-miR-23b-3p	lncRNA
NOP56	hsa-miR-24-3p	lncRNA
NOP56	hsa-miR-363-3p	lncRNA
NOP56	hsa-miR-107	lncRNA
NOP56	hsa-miR-449c-5p	lncRNA
NOP56	hsa-miR-125a-5p	lncRNA
NOP56	hsa-miR-125b-5p	lncRNA
NOP56	hsa-miR-10a-5p	lncRNA
NOP56	hsa-miR-129-5p	lncRNA
WDR13	hsa-miR-206	lncRNA
WDR13	hsa-miR-613	lncRNA
WDR13	hsa-miR-761	lncRNA
WDR13	hsa-miR-3619-5p	lncRNA
WDR13	hsa-miR-217	lncRNA
WDR13	hsa-miR-22-3p	lncRNA
WDR13	hsa-miR-24-3p	lncRNA
WDR13	hsa-miR-27a-3p	lncRNA
WDR13	hsa-miR-107	lncRNA
WDR13	hsa-miR-449c-5p	lncRNA
WDR13	hsa-miR-125a-5p	lncRNA
WDR13	hsa-miR-125b-5p	lncRNA
WDR13	hsa-miR-10a-5p	lncRNA
LMF1	hsa-miR-135a-5p	lncRNA
LMF1	hsa-miR-140-5p	lncRNA
LMF1	hsa-miR-876-3p	lncRNA
LMF1	hsa-miR-142-3p	lncRNA
LMF1	hsa-miR-206	lncRNA
LMF1	hsa-miR-613	lncRNA
LMF1	hsa-miR-761	lncRNA
LMF1	hsa-miR-3619-5p	lncRNA
LMF1	hsa-miR-22-3p	lncRNA
LMF1	hsa-miR-24-3p	lncRNA
LMF1	hsa-miR-107	lncRNA
LMF1	hsa-miR-125a-5p	lncRNA
LMF1	hsa-miR-125b-5p	lncRNA
LMF1	hsa-miR-10a-5p	lncRNA
IKBKB	hsa-miR-212-3p	lncRNA
IKBKB	hsa-miR-507	lncRNA
IKBKB	hsa-miR-135a-5p	lncRNA
IKBKB	hsa-miR-137	lncRNA
IKBKB	hsa-miR-139-5p	lncRNA
IKBKB	hsa-miR-17-5p	lncRNA
IKBKB	hsa-miR-20b-5p	lncRNA
IKBKB	hsa-miR-206	lncRNA
IKBKB	hsa-miR-613	lncRNA
IKBKB	hsa-miR-429	lncRNA
IKBKB	hsa-miR-761	lncRNA
IKBKB	hsa-miR-3619-5p	lncRNA
IKBKB	hsa-miR-216b-5p	lncRNA
IKBKB	hsa-miR-217	lncRNA
IKBKB	hsa-miR-508-3p	lncRNA
IKBKB	hsa-miR-22-3p	lncRNA
IKBKB	hsa-miR-23b-3p	lncRNA
IKBKB	hsa-miR-24-3p	lncRNA
IKBKB	hsa-miR-1297	lncRNA
IKBKB	hsa-miR-27a-3p	lncRNA
IKBKB	hsa-miR-107	lncRNA
IKBKB	hsa-miR-33a-3p	lncRNA
IKBKB	hsa-miR-449c-5p	lncRNA
IKBKB	hsa-miR-125a-5p	lncRNA
IKBKB	hsa-miR-125b-5p	lncRNA
IKBKB	hsa-miR-10a-5p	lncRNA
IKBKB	hsa-miR-129-5p	lncRNA
ZFR2	hsa-miR-507	lncRNA
ZFR2	hsa-miR-17-5p	lncRNA
ZFR2	hsa-miR-20b-5p	lncRNA
ZFR2	hsa-miR-184	lncRNA
ZFR2	hsa-miR-429	lncRNA
ZFR2	hsa-miR-761	lncRNA
ZFR2	hsa-miR-3619-5p	lncRNA
ZFR2	hsa-miR-217	lncRNA
ZFR2	hsa-miR-22-3p	lncRNA
ZFR2	hsa-miR-24-3p	lncRNA
ZFR2	hsa-miR-10a-5p	lncRNA
ZFR2	hsa-miR-129-5p	lncRNA
ATP5SL	hsa-miR-212-3p	lncRNA
ATP5SL	hsa-miR-17-5p	lncRNA
ATP5SL	hsa-miR-20b-5p	lncRNA
ATP5SL	hsa-miR-193a-3p	lncRNA
ATP5SL	hsa-miR-429	lncRNA
ATP5SL	hsa-miR-27a-3p	lncRNA
ATP5SL	hsa-miR-107	lncRNA
ATP5SL	hsa-miR-33a-3p	lncRNA
ATP5SL	hsa-miR-449c-5p	lncRNA
NAPA	hsa-miR-761	lncRNA
NAPA	hsa-miR-3619-5p	lncRNA
NAPA	hsa-miR-107	lncRNA
DDX49	hsa-miR-140-5p	lncRNA
DDX49	hsa-miR-876-3p	lncRNA
DDX49	hsa-miR-146b-5p	lncRNA
DDX49	hsa-miR-17-5p	lncRNA
DDX49	hsa-miR-20b-5p	lncRNA
DDX49	hsa-miR-761	lncRNA
DDX49	hsa-miR-3619-5p	lncRNA
DDX49	hsa-miR-22-3p	lncRNA
DDX49	hsa-miR-24-3p	lncRNA
DDX49	hsa-miR-107	lncRNA
ABHD11	hsa-miR-139-5p	lncRNA
ABHD11	hsa-miR-140-5p	lncRNA
ABHD11	hsa-miR-876-3p	lncRNA
ABHD11	hsa-miR-142-3p	lncRNA
ABHD11	hsa-miR-17-5p	lncRNA
ABHD11	hsa-miR-20b-5p	lncRNA
ABHD11	hsa-miR-761	lncRNA
ABHD11	hsa-miR-3619-5p	lncRNA
ABHD11	hsa-miR-216b-5p	lncRNA
ABHD11	hsa-miR-217	lncRNA
ABHD11	hsa-miR-24-3p	lncRNA
ABHD11	hsa-miR-1297	lncRNA
ABHD11	hsa-miR-107	lncRNA
ABHD11	hsa-miR-10a-5p	lncRNA
ABHD11	hsa-miR-129-5p	lncRNA
PHF14	hsa-miR-301b-3p	lncRNA
PHF14	hsa-miR-212-3p	lncRNA
PHF14	hsa-miR-507	lncRNA
PHF14	hsa-miR-137	lncRNA
PHF14	hsa-miR-139-5p	lncRNA
PHF14	hsa-miR-146b-5p	lncRNA
PHF14	hsa-miR-17-5p	lncRNA
PHF14	hsa-miR-20b-5p	lncRNA
PHF14	hsa-miR-206	lncRNA
PHF14	hsa-miR-613	lncRNA
PHF14	hsa-miR-429	lncRNA
PHF14	hsa-miR-761	lncRNA
PHF14	hsa-miR-3619-5p	lncRNA
PHF14	hsa-miR-217	lncRNA
PHF14	hsa-miR-22-3p	lncRNA
PHF14	hsa-miR-23b-3p	lncRNA
PHF14	hsa-miR-24-3p	lncRNA
PHF14	hsa-miR-363-3p	lncRNA
PHF14	hsa-miR-27a-3p	lncRNA
PHF14	hsa-miR-107	lncRNA
PHF14	hsa-miR-33a-3p	lncRNA
PHF14	hsa-miR-129-5p	lncRNA
FOXRED1	hsa-miR-135a-5p	lncRNA
FOXRED1	hsa-miR-137	lncRNA
FOXRED1	hsa-miR-140-5p	lncRNA
FOXRED1	hsa-miR-876-3p	lncRNA
FOXRED1	hsa-miR-146b-5p	lncRNA
FOXRED1	hsa-miR-17-5p	lncRNA
FOXRED1	hsa-miR-20b-5p	lncRNA
FOXRED1	hsa-miR-216b-5p	lncRNA
FOXRED1	hsa-miR-23b-3p	lncRNA
FOXRED1	hsa-miR-24-3p	lncRNA
FOXRED1	hsa-miR-363-3p	lncRNA
FOXRED1	hsa-miR-107	lncRNA
FOXRED1	hsa-miR-33a-3p	lncRNA
FOXRED1	hsa-miR-449c-5p	lncRNA
MDK	hsa-miR-142-3p	lncRNA
MDK	hsa-miR-193a-3p	lncRNA
MDK	hsa-miR-761	lncRNA
MDK	hsa-miR-3619-5p	lncRNA
MDK	hsa-miR-23b-3p	lncRNA
MDK	hsa-miR-24-3p	lncRNA
PTK7	hsa-miR-301b-3p	lncRNA
PTK7	hsa-miR-507	lncRNA
PTK7	hsa-miR-135a-5p	lncRNA
PTK7	hsa-miR-137	lncRNA
PTK7	hsa-miR-139-5p	lncRNA
PTK7	hsa-miR-142-3p	lncRNA
PTK7	hsa-miR-146b-5p	lncRNA
PTK7	hsa-miR-17-5p	lncRNA
PTK7	hsa-miR-20b-5p	lncRNA
PTK7	hsa-miR-193a-3p	lncRNA
PTK7	hsa-miR-429	lncRNA
PTK7	hsa-miR-761	lncRNA
PTK7	hsa-miR-3619-5p	lncRNA
PTK7	hsa-miR-216b-5p	lncRNA
PTK7	hsa-miR-217	lncRNA
PTK7	hsa-miR-23b-3p	lncRNA
PTK7	hsa-miR-24-3p	lncRNA
PTK7	hsa-miR-1297	lncRNA
PTK7	hsa-miR-27a-3p	lncRNA
PTK7	hsa-miR-107	lncRNA
PTK7	hsa-miR-449c-5p	lncRNA
PTK7	hsa-miR-125a-5p	lncRNA
PTK7	hsa-miR-125b-5p	lncRNA
PTK7	hsa-miR-10a-5p	lncRNA
PRLR	hsa-miR-212-3p	lncRNA
PRLR	hsa-miR-507	lncRNA
PRLR	hsa-miR-135a-5p	lncRNA
PRLR	hsa-miR-137	lncRNA
PRLR	hsa-miR-140-5p	lncRNA
PRLR	hsa-miR-876-3p	lncRNA
PRLR	hsa-miR-142-3p	lncRNA
PRLR	hsa-miR-146b-5p	lncRNA
PRLR	hsa-miR-17-5p	lncRNA
PRLR	hsa-miR-20b-5p	lncRNA
PRLR	hsa-miR-184	lncRNA
PRLR	hsa-miR-193a-3p	lncRNA
PRLR	hsa-miR-206	lncRNA
PRLR	hsa-miR-613	lncRNA
PRLR	hsa-miR-429	lncRNA
PRLR	hsa-miR-761	lncRNA
PRLR	hsa-miR-3619-5p	lncRNA
PRLR	hsa-miR-216b-5p	lncRNA
PRLR	hsa-miR-22-3p	lncRNA
PRLR	hsa-miR-23b-3p	lncRNA
PRLR	hsa-miR-1297	lncRNA
PRLR	hsa-miR-27a-3p	lncRNA
PRLR	hsa-miR-107	lncRNA
PRLR	hsa-miR-33a-3p	lncRNA
PRLR	hsa-miR-449c-5p	lncRNA
PRLR	hsa-miR-10a-5p	lncRNA
PRLR	hsa-miR-129-5p	lncRNA
KANSL3	hsa-miR-212-3p	lncRNA
KANSL3	hsa-miR-135a-5p	lncRNA
KANSL3	hsa-miR-140-5p	lncRNA
KANSL3	hsa-miR-876-3p	lncRNA
KANSL3	hsa-miR-142-3p	lncRNA
KANSL3	hsa-miR-146b-5p	lncRNA
KANSL3	hsa-miR-193a-3p	lncRNA
KANSL3	hsa-miR-761	lncRNA
KANSL3	hsa-miR-3619-5p	lncRNA
KANSL3	hsa-miR-217	lncRNA
KANSL3	hsa-miR-508-3p	lncRNA
KANSL3	hsa-miR-22-3p	lncRNA
KANSL3	hsa-miR-23b-3p	lncRNA
KANSL3	hsa-miR-24-3p	lncRNA
KANSL3	hsa-miR-27a-3p	lncRNA
KANSL3	hsa-miR-107	lncRNA
KANSL3	hsa-miR-33a-3p	lncRNA
KANSL3	hsa-miR-125a-5p	lncRNA
KANSL3	hsa-miR-125b-5p	lncRNA
KANSL3	hsa-miR-10a-5p	lncRNA
KANSL3	hsa-miR-129-5p	lncRNA
LMAN2L	hsa-miR-507	lncRNA
LMAN2L	hsa-miR-146b-5p	lncRNA
LMAN2L	hsa-miR-17-5p	lncRNA
LMAN2L	hsa-miR-20b-5p	lncRNA
LMAN2L	hsa-miR-429	lncRNA
LMAN2L	hsa-miR-761	lncRNA
LMAN2L	hsa-miR-3619-5p	lncRNA
LMAN2L	hsa-miR-217	lncRNA
LMAN2L	hsa-miR-24-3p	lncRNA
LMAN2L	hsa-miR-1297	lncRNA
LMAN2L	hsa-miR-27a-3p	lncRNA
LMAN2L	hsa-miR-107	lncRNA
LMAN2L	hsa-miR-449c-5p	lncRNA
LMAN2L	hsa-miR-10a-5p	lncRNA
SNX17	hsa-miR-507	lncRNA
SNX17	hsa-miR-17-5p	lncRNA
SNX17	hsa-miR-20b-5p	lncRNA
SNX17	hsa-miR-761	lncRNA
SNX17	hsa-miR-3619-5p	lncRNA
SNX17	hsa-miR-217	lncRNA
SNX17	hsa-miR-107	lncRNA
SNX17	hsa-miR-33a-3p	lncRNA
SNX17	hsa-miR-449c-5p	lncRNA
SNX17	hsa-miR-125a-5p	lncRNA
SNX17	hsa-miR-125b-5p	lncRNA
SNX17	hsa-miR-10a-5p	lncRNA
TTC31	hsa-miR-135a-5p	lncRNA
TTC31	hsa-miR-139-5p	lncRNA
TTC31	hsa-miR-140-5p	lncRNA
TTC31	hsa-miR-876-3p	lncRNA
TTC31	hsa-miR-146b-5p	lncRNA
TTC31	hsa-miR-17-5p	lncRNA
TTC31	hsa-miR-20b-5p	lncRNA
TTC31	hsa-miR-184	lncRNA
TTC31	hsa-miR-193a-3p	lncRNA
TTC31	hsa-miR-761	lncRNA
TTC31	hsa-miR-3619-5p	lncRNA
TTC31	hsa-miR-216b-5p	lncRNA
TTC31	hsa-miR-22-3p	lncRNA
TTC31	hsa-miR-24-3p	lncRNA
TTC31	hsa-miR-363-3p	lncRNA
TTC31	hsa-miR-107	lncRNA
TTC31	hsa-miR-125a-5p	lncRNA
TTC31	hsa-miR-125b-5p	lncRNA
TTC31	hsa-miR-10a-5p	lncRNA
CHMP3	hsa-miR-301b-3p	lncRNA
CHMP3	hsa-miR-507	lncRNA
CHMP3	hsa-miR-140-5p	lncRNA
CHMP3	hsa-miR-876-3p	lncRNA
CHMP3	hsa-miR-142-3p	lncRNA
CHMP3	hsa-miR-146b-5p	lncRNA
CHMP3	hsa-miR-17-5p	lncRNA
CHMP3	hsa-miR-20b-5p	lncRNA
CHMP3	hsa-miR-761	lncRNA
CHMP3	hsa-miR-3619-5p	lncRNA
CHMP3	hsa-miR-216b-5p	lncRNA
CHMP3	hsa-miR-217	lncRNA
CHMP3	hsa-miR-508-3p	lncRNA
CHMP3	hsa-miR-22-3p	lncRNA
CHMP3	hsa-miR-23b-3p	lncRNA
CHMP3	hsa-miR-27a-3p	lncRNA
CHMP3	hsa-miR-107	lncRNA
CHMP3	hsa-miR-33a-3p	lncRNA
CHMP3	hsa-miR-449c-5p	lncRNA
CHMP3	hsa-miR-129-5p	lncRNA
ORC2	hsa-miR-301b-3p	lncRNA
ORC2	hsa-miR-137	lncRNA
ORC2	hsa-miR-140-5p	lncRNA
ORC2	hsa-miR-876-3p	lncRNA
ORC2	hsa-miR-17-5p	lncRNA
ORC2	hsa-miR-20b-5p	lncRNA
ORC2	hsa-miR-761	lncRNA
ORC2	hsa-miR-3619-5p	lncRNA
ORC2	hsa-miR-216b-5p	lncRNA
ORC2	hsa-miR-217	lncRNA
ORC2	hsa-miR-23b-3p	lncRNA
ORC2	hsa-miR-24-3p	lncRNA
ORC2	hsa-miR-363-3p	lncRNA
ORC2	hsa-miR-27a-3p	lncRNA
ORC2	hsa-miR-107	lncRNA
ORC2	hsa-miR-125a-5p	lncRNA
ORC2	hsa-miR-125b-5p	lncRNA
ORC2	hsa-miR-129-5p	lncRNA
ATF2	hsa-miR-212-3p	lncRNA
ATF2	hsa-miR-135a-5p	lncRNA
ATF2	hsa-miR-142-3p	lncRNA
ATF2	hsa-miR-146b-5p	lncRNA
ATF2	hsa-miR-17-5p	lncRNA
ATF2	hsa-miR-20b-5p	lncRNA
ATF2	hsa-miR-206	lncRNA
ATF2	hsa-miR-613	lncRNA
ATF2	hsa-miR-429	lncRNA
ATF2	hsa-miR-761	lncRNA
ATF2	hsa-miR-3619-5p	lncRNA
ATF2	hsa-miR-216b-5p	lncRNA
ATF2	hsa-miR-217	lncRNA
ATF2	hsa-miR-22-3p	lncRNA
ATF2	hsa-miR-23b-3p	lncRNA
ATF2	hsa-miR-24-3p	lncRNA
ATF2	hsa-miR-363-3p	lncRNA
ATF2	hsa-miR-1297	lncRNA
ATF2	hsa-miR-27a-3p	lncRNA
ATF2	hsa-miR-125a-5p	lncRNA
ATF2	hsa-miR-125b-5p	lncRNA
ATF2	hsa-miR-10a-5p	lncRNA
ATF2	hsa-miR-129-5p	lncRNA
ESPNP	hsa-miR-212-3p	lncRNA
ESPNP	hsa-miR-146b-5p	lncRNA
ESPNP	hsa-miR-216b-5p	lncRNA
ESPNP	hsa-miR-22-3p	lncRNA
ESPNP	hsa-miR-107	lncRNA
ESPNP	hsa-miR-449c-5p	lncRNA
NSUN4	hsa-miR-301b-3p	lncRNA
NSUN4	hsa-miR-507	lncRNA
NSUN4	hsa-miR-135a-5p	lncRNA
NSUN4	hsa-miR-137	lncRNA
NSUN4	hsa-miR-139-5p	lncRNA
NSUN4	hsa-miR-146b-5p	lncRNA
NSUN4	hsa-miR-17-5p	lncRNA
NSUN4	hsa-miR-20b-5p	lncRNA
NSUN4	hsa-miR-761	lncRNA
NSUN4	hsa-miR-3619-5p	lncRNA
NSUN4	hsa-miR-216b-5p	lncRNA
NSUN4	hsa-miR-22-3p	lncRNA
NSUN4	hsa-miR-24-3p	lncRNA
NSUN4	hsa-miR-363-3p	lncRNA
NSUN4	hsa-miR-27a-3p	lncRNA
NSUN4	hsa-miR-107	lncRNA
NSUN4	hsa-miR-125a-5p	lncRNA
NSUN4	hsa-miR-125b-5p	lncRNA
NSUN4	hsa-miR-129-5p	lncRNA
NENF	hsa-miR-142-3p	lncRNA
NENF	hsa-miR-17-5p	lncRNA
NENF	hsa-miR-20b-5p	lncRNA
NENF	hsa-miR-24-3p	lncRNA
NENF	hsa-miR-449c-5p	lncRNA
TXNDC12	hsa-miR-137	lncRNA
TXNDC12	hsa-miR-17-5p	lncRNA
TXNDC12	hsa-miR-20b-5p	lncRNA
TXNDC12	hsa-miR-184	lncRNA
TXNDC12	hsa-miR-193a-3p	lncRNA
TXNDC12	hsa-miR-22-3p	lncRNA
TXNDC12	hsa-miR-24-3p	lncRNA
TXNDC12	hsa-miR-363-3p	lncRNA
TXNDC12	hsa-miR-27a-3p	lncRNA
TXNDC12	hsa-miR-33a-3p	lncRNA
TXNDC12	hsa-miR-449c-5p	lncRNA
TXNDC12	hsa-miR-129-5p	lncRNA
CCDC70	hsa-miR-17-5p	lncRNA
CCDC70	hsa-miR-20b-5p	lncRNA
CCDC70	hsa-miR-429	lncRNA
CCDC70	hsa-miR-22-3p	lncRNA
CCDC70	hsa-miR-449c-5p	lncRNA
CCDC70	hsa-miR-125a-5p	lncRNA
CCDC70	hsa-miR-125b-5p	lncRNA
SPRYD7	hsa-miR-212-3p	lncRNA
SPRYD7	hsa-miR-146b-5p	lncRNA
SPRYD7	hsa-miR-17-5p	lncRNA
SPRYD7	hsa-miR-20b-5p	lncRNA
SPRYD7	hsa-miR-23b-3p	lncRNA
SPRYD7	hsa-miR-363-3p	lncRNA
SPRYD7	hsa-miR-1297	lncRNA
SPRYD7	hsa-miR-107	lncRNA
SPRYD7	hsa-miR-449c-5p	lncRNA
SPRYD7	hsa-miR-125a-5p	lncRNA
SPRYD7	hsa-miR-125b-5p	lncRNA
SPRYD7	hsa-miR-129-5p	lncRNA
GUCY1B2	hsa-miR-507	lncRNA
GUCY1B2	hsa-miR-135a-5p	lncRNA
GUCY1B2	hsa-miR-142-3p	lncRNA
GUCY1B2	hsa-miR-22-3p	lncRNA
GUCY1B2	hsa-miR-24-3p	lncRNA
GUCY1B2	hsa-miR-1297	lncRNA
GUCY1B2	hsa-miR-27a-3p	lncRNA
GUCY1B2	hsa-miR-107	lncRNA
GUCY1B2	hsa-miR-125a-5p	lncRNA
GUCY1B2	hsa-miR-125b-5p	lncRNA
GUCY1B2	hsa-miR-129-5p	lncRNA
PIGT	hsa-miR-140-5p	lncRNA
PIGT	hsa-miR-876-3p	lncRNA
PIGT	hsa-miR-142-3p	lncRNA
PIGT	hsa-miR-206	lncRNA
PIGT	hsa-miR-613	lncRNA
PIGT	hsa-miR-761	lncRNA
PIGT	hsa-miR-3619-5p	lncRNA
PIGT	hsa-miR-22-3p	lncRNA
PIGT	hsa-miR-449c-5p	lncRNA
PIGT	hsa-miR-125a-5p	lncRNA
PIGT	hsa-miR-125b-5p	lncRNA
BTN2A3P	hsa-miR-301b-3p	lncRNA
BTN2A3P	hsa-miR-139-5p	lncRNA
BTN2A3P	hsa-miR-142-3p	lncRNA
BTN2A3P	hsa-miR-146b-5p	lncRNA
BTN2A3P	hsa-miR-17-5p	lncRNA
BTN2A3P	hsa-miR-20b-5p	lncRNA
BTN2A3P	hsa-miR-761	lncRNA
BTN2A3P	hsa-miR-3619-5p	lncRNA
BTN2A3P	hsa-miR-216b-5p	lncRNA
BTN2A3P	hsa-miR-23b-3p	lncRNA
BTN2A3P	hsa-miR-24-3p	lncRNA
BTN2A3P	hsa-miR-363-3p	lncRNA
BTN2A3P	hsa-miR-1297	lncRNA
BTN2A3P	hsa-miR-107	lncRNA
BTN2A3P	hsa-miR-33a-3p	lncRNA
BTN2A3P	hsa-miR-449c-5p	lncRNA
BTN2A3P	hsa-miR-125a-5p	lncRNA
BTN2A3P	hsa-miR-125b-5p	lncRNA
FAM193A	hsa-miR-140-5p	lncRNA
FAM193A	hsa-miR-876-3p	lncRNA
FAM193A	hsa-miR-17-5p	lncRNA
FAM193A	hsa-miR-20b-5p	lncRNA
FAM193A	hsa-miR-761	lncRNA
FAM193A	hsa-miR-3619-5p	lncRNA
FAM193A	hsa-miR-22-3p	lncRNA
FAM193A	hsa-miR-23b-3p	lncRNA
FAM193A	hsa-miR-24-3p	lncRNA
FAM193A	hsa-miR-363-3p	lncRNA
FAM193A	hsa-miR-1297	lncRNA
FAM193A	hsa-miR-107	lncRNA
FAM193A	hsa-miR-33a-3p	lncRNA
FAM193A	hsa-miR-129-5p	lncRNA
ST3GAL3	hsa-miR-301b-3p	lncRNA
ST3GAL3	hsa-miR-507	lncRNA
ST3GAL3	hsa-miR-135a-5p	lncRNA
ST3GAL3	hsa-miR-137	lncRNA
ST3GAL3	hsa-miR-139-5p	lncRNA
ST3GAL3	hsa-miR-142-3p	lncRNA
ST3GAL3	hsa-miR-146b-5p	lncRNA
ST3GAL3	hsa-miR-17-5p	lncRNA
ST3GAL3	hsa-miR-20b-5p	lncRNA
ST3GAL3	hsa-miR-193a-3p	lncRNA
ST3GAL3	hsa-miR-761	lncRNA
ST3GAL3	hsa-miR-3619-5p	lncRNA
ST3GAL3	hsa-miR-216b-5p	lncRNA
ST3GAL3	hsa-miR-508-3p	lncRNA
ST3GAL3	hsa-miR-22-3p	lncRNA
ST3GAL3	hsa-miR-23b-3p	lncRNA
ST3GAL3	hsa-miR-107	lncRNA
ST3GAL3	hsa-miR-449c-5p	lncRNA
AIF1L	hsa-miR-193a-3p	lncRNA
AIF1L	hsa-miR-206	lncRNA
AIF1L	hsa-miR-613	lncRNA
AIF1L	hsa-miR-217	lncRNA
AIF1L	hsa-miR-508-3p	lncRNA
AIF1L	hsa-miR-22-3p	lncRNA
AIF1L	hsa-miR-23b-3p	lncRNA
AIF1L	hsa-miR-24-3p	lncRNA
AIF1L	hsa-miR-27a-3p	lncRNA
AIF1L	hsa-miR-107	lncRNA
AIF1L	hsa-miR-449c-5p	lncRNA
AIF1L	hsa-miR-125a-5p	lncRNA
AIF1L	hsa-miR-125b-5p	lncRNA
AIF1L	hsa-miR-10a-5p	lncRNA
EPS15L1	hsa-miR-301b-3p	lncRNA
EPS15L1	hsa-miR-206	lncRNA
EPS15L1	hsa-miR-613	lncRNA
EPS15L1	hsa-miR-216b-5p	lncRNA
EPS15L1	hsa-miR-22-3p	lncRNA
EPS15L1	hsa-miR-449c-5p	lncRNA
EPS15L1	hsa-miR-10a-5p	lncRNA
TUBBP1	hsa-miR-507	lncRNA
TUBBP1	hsa-miR-142-3p	lncRNA
TUBBP1	hsa-miR-184	lncRNA
TUBBP1	hsa-miR-761	lncRNA
TUBBP1	hsa-miR-3619-5p	lncRNA
TUBBP1	hsa-miR-22-3p	lncRNA
TUBBP1	hsa-miR-449c-5p	lncRNA
TUBBP1	hsa-miR-129-5p	lncRNA
PMS2P3	hsa-miR-193a-3p	lncRNA
PMS2P3	hsa-miR-27a-3p	lncRNA
PMS2P3	hsa-miR-449c-5p	lncRNA
MPDU1	hsa-miR-301b-3p	lncRNA
MPDU1	hsa-miR-139-5p	lncRNA
MPDU1	hsa-miR-142-3p	lncRNA
MPDU1	hsa-miR-193a-3p	lncRNA
MPDU1	hsa-miR-206	lncRNA
MPDU1	hsa-miR-613	lncRNA
MPDU1	hsa-miR-761	lncRNA
MPDU1	hsa-miR-3619-5p	lncRNA
MPDU1	hsa-miR-24-3p	lncRNA
MPDU1	hsa-miR-363-3p	lncRNA
MPDU1	hsa-miR-27a-3p	lncRNA
MPDU1	hsa-miR-107	lncRNA
MPDU1	hsa-miR-33a-3p	lncRNA
MPDU1	hsa-miR-125a-5p	lncRNA
MPDU1	hsa-miR-125b-5p	lncRNA
MPDU1	hsa-miR-10a-5p	lncRNA
ASH2L	hsa-miR-507	lncRNA
ASH2L	hsa-miR-140-5p	lncRNA
ASH2L	hsa-miR-876-3p	lncRNA
ASH2L	hsa-miR-142-3p	lncRNA
ASH2L	hsa-miR-17-5p	lncRNA
ASH2L	hsa-miR-20b-5p	lncRNA
ASH2L	hsa-miR-206	lncRNA
ASH2L	hsa-miR-613	lncRNA
ASH2L	hsa-miR-24-3p	lncRNA
ASH2L	hsa-miR-1297	lncRNA
ASH2L	hsa-miR-27a-3p	lncRNA
ASH2L	hsa-miR-33a-3p	lncRNA
ASH2L	hsa-miR-449c-5p	lncRNA
ASH2L	hsa-miR-10a-5p	lncRNA
ASH2L	hsa-miR-129-5p	lncRNA
H19	hsa-miR-301b-3p	lncRNA
H19	hsa-miR-212-3p	lncRNA
H19	hsa-miR-140-5p	lncRNA
H19	hsa-miR-876-3p	lncRNA
H19	hsa-miR-17-5p	lncRNA
H19	hsa-miR-20b-5p	lncRNA
H19	hsa-miR-193a-3p	lncRNA
H19	hsa-miR-206	lncRNA
H19	hsa-miR-613	lncRNA
H19	hsa-miR-216b-5p	lncRNA
H19	hsa-miR-22-3p	lncRNA
H19	hsa-miR-24-3p	lncRNA
H19	hsa-miR-107	lncRNA
NAPSB	hsa-miR-142-3p	lncRNA
NAPSB	hsa-miR-184	lncRNA
NAPSB	hsa-miR-429	lncRNA
NAPSB	hsa-miR-761	lncRNA
NAPSB	hsa-miR-3619-5p	lncRNA
NAPSB	hsa-miR-27a-3p	lncRNA
NAPSB	hsa-miR-125a-5p	lncRNA
NAPSB	hsa-miR-125b-5p	lncRNA
TTTY6	hsa-miR-429	lncRNA
TTTY6	hsa-miR-27a-3p	lncRNA
TTTY6	hsa-miR-125a-5p	lncRNA
TTTY6	hsa-miR-125b-5p	lncRNA
PPFIA1	hsa-miR-301b-3p	lncRNA
PPFIA1	hsa-miR-135a-5p	lncRNA
PPFIA1	hsa-miR-139-5p	lncRNA
PPFIA1	hsa-miR-142-3p	lncRNA
PPFIA1	hsa-miR-146b-5p	lncRNA
PPFIA1	hsa-miR-206	lncRNA
PPFIA1	hsa-miR-613	lncRNA
PPFIA1	hsa-miR-429	lncRNA
PPFIA1	hsa-miR-216b-5p	lncRNA
PPFIA1	hsa-miR-508-3p	lncRNA
PPFIA1	hsa-miR-22-3p	lncRNA
PPFIA1	hsa-miR-1297	lncRNA
PPFIA1	hsa-miR-27a-3p	lncRNA
PPFIA1	hsa-miR-33a-3p	lncRNA
PPFIA1	hsa-miR-449c-5p	lncRNA
PPFIA1	hsa-miR-125a-5p	lncRNA
PPFIA1	hsa-miR-125b-5p	lncRNA
PPFIA1	hsa-miR-129-5p	lncRNA
KIAA0664L3	hsa-miR-135a-5p	lncRNA
KIAA0664L3	hsa-miR-139-5p	lncRNA
KIAA0664L3	hsa-miR-142-3p	lncRNA
KIAA0664L3	hsa-miR-206	lncRNA
KIAA0664L3	hsa-miR-613	lncRNA
KIAA0664L3	hsa-miR-761	lncRNA
KIAA0664L3	hsa-miR-3619-5p	lncRNA
KIAA0664L3	hsa-miR-22-3p	lncRNA
KIAA0664L3	hsa-miR-24-3p	lncRNA
KIAA0664L3	hsa-miR-27a-3p	lncRNA
KIAA0664L3	hsa-miR-449c-5p	lncRNA
KIAA0664L3	hsa-miR-125a-5p	lncRNA
KIAA0664L3	hsa-miR-125b-5p	lncRNA
KIAA0664L3	hsa-miR-129-5p	lncRNA
LINC00470	hsa-miR-135a-5p	lncRNA
LINC00470	hsa-miR-139-5p	lncRNA
LINC00470	hsa-miR-140-5p	lncRNA
LINC00470	hsa-miR-876-3p	lncRNA
LINC00470	hsa-miR-193a-3p	lncRNA
LINC00470	hsa-miR-429	lncRNA
LINC00470	hsa-miR-761	lncRNA
LINC00470	hsa-miR-3619-5p	lncRNA
LINC00470	hsa-miR-216b-5p	lncRNA
LINC00470	hsa-miR-508-3p	lncRNA
LINC00470	hsa-miR-1297	lncRNA
LINC00470	hsa-miR-27a-3p	lncRNA
LINC00470	hsa-miR-33a-3p	lncRNA
LINC00470	hsa-miR-129-5p	lncRNA
IQCA1	hsa-miR-212-3p	lncRNA
IQCA1	hsa-miR-507	lncRNA
IQCA1	hsa-miR-140-5p	lncRNA
IQCA1	hsa-miR-876-3p	lncRNA
IQCA1	hsa-miR-206	lncRNA
IQCA1	hsa-miR-613	lncRNA
IQCA1	hsa-miR-761	lncRNA
IQCA1	hsa-miR-3619-5p	lncRNA
IQCA1	hsa-miR-217	lncRNA
IQCA1	hsa-miR-508-3p	lncRNA
IQCA1	hsa-miR-22-3p	lncRNA
IQCA1	hsa-miR-23b-3p	lncRNA
IQCA1	hsa-miR-363-3p	lncRNA
IQCA1	hsa-miR-1297	lncRNA
IQCA1	hsa-miR-107	lncRNA
IQCA1	hsa-miR-125a-5p	lncRNA
IQCA1	hsa-miR-125b-5p	lncRNA
IQCA1	hsa-miR-129-5p	lncRNA
SDF2	hsa-miR-212-3p	lncRNA
SDF2	hsa-miR-135a-5p	lncRNA
SDF2	hsa-miR-22-3p	lncRNA
SDF2	hsa-miR-24-3p	lncRNA
SDF2	hsa-miR-27a-3p	lncRNA
SDF2	hsa-miR-129-5p	lncRNA
ZDHHC8P1	hsa-miR-212-3p	lncRNA
ZDHHC8P1	hsa-miR-142-3p	lncRNA
ZDHHC8P1	hsa-miR-17-5p	lncRNA
ZDHHC8P1	hsa-miR-20b-5p	lncRNA
ZDHHC8P1	hsa-miR-193a-3p	lncRNA
ZDHHC8P1	hsa-miR-761	lncRNA
ZDHHC8P1	hsa-miR-3619-5p	lncRNA
ZDHHC8P1	hsa-miR-24-3p	lncRNA
ZDHHC8P1	hsa-miR-33a-3p	lncRNA
ZDHHC8P1	hsa-miR-449c-5p	lncRNA
ZDHHC8P1	hsa-miR-129-5p	lncRNA
VTCN1	hsa-miR-301b-3p	lncRNA
VTCN1	hsa-miR-507	lncRNA
VTCN1	hsa-miR-135a-5p	lncRNA
VTCN1	hsa-miR-140-5p	lncRNA
VTCN1	hsa-miR-876-3p	lncRNA
VTCN1	hsa-miR-17-5p	lncRNA
VTCN1	hsa-miR-20b-5p	lncRNA
VTCN1	hsa-miR-193a-3p	lncRNA
VTCN1	hsa-miR-206	lncRNA
VTCN1	hsa-miR-613	lncRNA
VTCN1	hsa-miR-22-3p	lncRNA
VTCN1	hsa-miR-23b-3p	lncRNA
VTCN1	hsa-miR-107	lncRNA
VTCN1	hsa-miR-33a-3p	lncRNA
VTCN1	hsa-miR-449c-5p	lncRNA
VTCN1	hsa-miR-125a-5p	lncRNA
VTCN1	hsa-miR-125b-5p	lncRNA
VTCN1	hsa-miR-129-5p	lncRNA
FOLH1B	hsa-miR-761	lncRNA
FOLH1B	hsa-miR-3619-5p	lncRNA
FOLH1B	hsa-miR-216b-5p	lncRNA
FOLH1B	hsa-miR-217	lncRNA
FOLH1B	hsa-miR-22-3p	lncRNA
FOLH1B	hsa-miR-23b-3p	lncRNA
FOLH1B	hsa-miR-27a-3p	lncRNA
FOLH1B	hsa-miR-129-5p	lncRNA
P2RX4	hsa-miR-301b-3p	lncRNA
P2RX4	hsa-miR-212-3p	lncRNA
P2RX4	hsa-miR-135a-5p	lncRNA
P2RX4	hsa-miR-139-5p	lncRNA
P2RX4	hsa-miR-140-5p	lncRNA
P2RX4	hsa-miR-876-3p	lncRNA
P2RX4	hsa-miR-142-3p	lncRNA
P2RX4	hsa-miR-17-5p	lncRNA
P2RX4	hsa-miR-20b-5p	lncRNA
P2RX4	hsa-miR-429	lncRNA
P2RX4	hsa-miR-508-3p	lncRNA
P2RX4	hsa-miR-24-3p	lncRNA
P2RX4	hsa-miR-363-3p	lncRNA
P2RX4	hsa-miR-1297	lncRNA
P2RX4	hsa-miR-27a-3p	lncRNA
P2RX4	hsa-miR-125a-5p	lncRNA
P2RX4	hsa-miR-125b-5p	lncRNA
P2RX4	hsa-miR-10a-5p	lncRNA
P2RX4	hsa-miR-129-5p	lncRNA
DMTF1	hsa-miR-301b-3p	lncRNA
DMTF1	hsa-miR-212-3p	lncRNA
DMTF1	hsa-miR-137	lncRNA
DMTF1	hsa-miR-140-5p	lncRNA
DMTF1	hsa-miR-876-3p	lncRNA
DMTF1	hsa-miR-142-3p	lncRNA
DMTF1	hsa-miR-17-5p	lncRNA
DMTF1	hsa-miR-20b-5p	lncRNA
DMTF1	hsa-miR-193a-3p	lncRNA
DMTF1	hsa-miR-429	lncRNA
DMTF1	hsa-miR-217	lncRNA
DMTF1	hsa-miR-22-3p	lncRNA
DMTF1	hsa-miR-24-3p	lncRNA
DMTF1	hsa-miR-27a-3p	lncRNA
DMTF1	hsa-miR-449c-5p	lncRNA
DMTF1	hsa-miR-10a-5p	lncRNA
DMTF1	hsa-miR-129-5p	lncRNA
DHX9	hsa-miR-301b-3p	lncRNA
DHX9	hsa-miR-507	lncRNA
DHX9	hsa-miR-135a-5p	lncRNA
DHX9	hsa-miR-139-5p	lncRNA
DHX9	hsa-miR-140-5p	lncRNA
DHX9	hsa-miR-876-3p	lncRNA
DHX9	hsa-miR-142-3p	lncRNA
DHX9	hsa-miR-193a-3p	lncRNA
DHX9	hsa-miR-429	lncRNA
DHX9	hsa-miR-216b-5p	lncRNA
DHX9	hsa-miR-22-3p	lncRNA
DHX9	hsa-miR-1297	lncRNA
DHX9	hsa-miR-27a-3p	lncRNA
DHX9	hsa-miR-107	lncRNA
DHX9	hsa-miR-129-5p	lncRNA
CALHM2	hsa-miR-212-3p	lncRNA
CALHM2	hsa-miR-17-5p	lncRNA
CALHM2	hsa-miR-20b-5p	lncRNA
CALHM2	hsa-miR-184	lncRNA
CALHM2	hsa-miR-193a-3p	lncRNA
CALHM2	hsa-miR-761	lncRNA
CALHM2	hsa-miR-3619-5p	lncRNA
CALHM2	hsa-miR-217	lncRNA
CALHM2	hsa-miR-24-3p	lncRNA
CALHM2	hsa-miR-27a-3p	lncRNA
CALHM2	hsa-miR-449c-5p	lncRNA
CALHM2	hsa-miR-125a-5p	lncRNA
CALHM2	hsa-miR-125b-5p	lncRNA
CALHM2	hsa-miR-129-5p	lncRNA
MMAB	hsa-miR-301b-3p	lncRNA
MMAB	hsa-miR-507	lncRNA
MMAB	hsa-miR-142-3p	lncRNA
MMAB	hsa-miR-206	lncRNA
MMAB	hsa-miR-613	lncRNA
MMAB	hsa-miR-23b-3p	lncRNA
MMAB	hsa-miR-24-3p	lncRNA
MMAB	hsa-miR-363-3p	lncRNA
MMAB	hsa-miR-1297	lncRNA
MMAB	hsa-miR-27a-3p	lncRNA
MMAB	hsa-miR-107	lncRNA
MMAB	hsa-miR-449c-5p	lncRNA
MMAB	hsa-miR-125a-5p	lncRNA
MMAB	hsa-miR-125b-5p	lncRNA
MMAB	hsa-miR-10a-5p	lncRNA
HERC2P2	hsa-miR-212-3p	lncRNA
HERC2P2	hsa-miR-507	lncRNA
HERC2P2	hsa-miR-135a-5p	lncRNA
HERC2P2	hsa-miR-139-5p	lncRNA
HERC2P2	hsa-miR-140-5p	lncRNA
HERC2P2	hsa-miR-876-3p	lncRNA
HERC2P2	hsa-miR-142-3p	lncRNA
HERC2P2	hsa-miR-146b-5p	lncRNA
HERC2P2	hsa-miR-17-5p	lncRNA
HERC2P2	hsa-miR-20b-5p	lncRNA
HERC2P2	hsa-miR-193a-3p	lncRNA
HERC2P2	hsa-miR-429	lncRNA
HERC2P2	hsa-miR-761	lncRNA
HERC2P2	hsa-miR-3619-5p	lncRNA
HERC2P2	hsa-miR-216b-5p	lncRNA
HERC2P2	hsa-miR-508-3p	lncRNA
HERC2P2	hsa-miR-23b-3p	lncRNA
HERC2P2	hsa-miR-24-3p	lncRNA
HERC2P2	hsa-miR-1297	lncRNA
HERC2P2	hsa-miR-27a-3p	lncRNA
HERC2P2	hsa-miR-107	lncRNA
HERC2P2	hsa-miR-33a-3p	lncRNA
HERC2P2	hsa-miR-449c-5p	lncRNA
HERC2P2	hsa-miR-129-5p	lncRNA
SORD	hsa-miR-301b-3p	lncRNA
SORD	hsa-miR-212-3p	lncRNA
SORD	hsa-miR-135a-5p	lncRNA
SORD	hsa-miR-17-5p	lncRNA
SORD	hsa-miR-20b-5p	lncRNA
SORD	hsa-miR-193a-3p	lncRNA
SORD	hsa-miR-429	lncRNA
SORD	hsa-miR-216b-5p	lncRNA
SORD	hsa-miR-217	lncRNA
SORD	hsa-miR-508-3p	lncRNA
SORD	hsa-miR-24-3p	lncRNA
SORD	hsa-miR-363-3p	lncRNA
SORD	hsa-miR-1297	lncRNA
SORD	hsa-miR-27a-3p	lncRNA
SORD	hsa-miR-107	lncRNA
SORD	hsa-miR-125a-5p	lncRNA
SORD	hsa-miR-125b-5p	lncRNA
SORD	hsa-miR-10a-5p	lncRNA
SORD	hsa-miR-129-5p	lncRNA
GAS8	hsa-miR-139-5p	lncRNA
GAS8	hsa-miR-140-5p	lncRNA
GAS8	hsa-miR-876-3p	lncRNA
GAS8	hsa-miR-17-5p	lncRNA
GAS8	hsa-miR-20b-5p	lncRNA
GAS8	hsa-miR-193a-3p	lncRNA
GAS8	hsa-miR-761	lncRNA
GAS8	hsa-miR-3619-5p	lncRNA
GAS8	hsa-miR-217	lncRNA
GAS8	hsa-miR-22-3p	lncRNA
GAS8	hsa-miR-24-3p	lncRNA
GAS8	hsa-miR-27a-3p	lncRNA
GAS8	hsa-miR-449c-5p	lncRNA
GAS8	hsa-miR-125a-5p	lncRNA
GAS8	hsa-miR-125b-5p	lncRNA
GAS8	hsa-miR-10a-5p	lncRNA
GAS8	hsa-miR-129-5p	lncRNA
KIF2B	hsa-miR-17-5p	lncRNA
KIF2B	hsa-miR-20b-5p	lncRNA
KIF2B	hsa-miR-761	lncRNA
KIF2B	hsa-miR-3619-5p	lncRNA
KIF2B	hsa-miR-216b-5p	lncRNA
KIF2B	hsa-miR-217	lncRNA
KIF2B	hsa-miR-22-3p	lncRNA
KIF2B	hsa-miR-107	lncRNA
KIF2B	hsa-miR-33a-3p	lncRNA
KIF2B	hsa-miR-125a-5p	lncRNA
KIF2B	hsa-miR-125b-5p	lncRNA
KIF2B	hsa-miR-129-5p	lncRNA
FN3KRP	hsa-miR-140-5p	lncRNA
FN3KRP	hsa-miR-876-3p	lncRNA
FN3KRP	hsa-miR-142-3p	lncRNA
FN3KRP	hsa-miR-217	lncRNA
FN3KRP	hsa-miR-24-3p	lncRNA
FN3KRP	hsa-miR-1297	lncRNA
FN3KRP	hsa-miR-107	lncRNA
FN3KRP	hsa-miR-449c-5p	lncRNA
FN3KRP	hsa-miR-10a-5p	lncRNA
NT5C3L	hsa-miR-140-5p	lncRNA
NT5C3L	hsa-miR-876-3p	lncRNA
NT5C3L	hsa-miR-17-5p	lncRNA
NT5C3L	hsa-miR-20b-5p	lncRNA
NT5C3L	hsa-miR-184	lncRNA
NT5C3L	hsa-miR-193a-3p	lncRNA
NT5C3L	hsa-miR-206	lncRNA
NT5C3L	hsa-miR-613	lncRNA
NT5C3L	hsa-miR-761	lncRNA
NT5C3L	hsa-miR-3619-5p	lncRNA
NT5C3L	hsa-miR-24-3p	lncRNA
NT5C3L	hsa-miR-107	lncRNA
NT5C3L	hsa-miR-33a-3p	lncRNA
NT5C3L	hsa-miR-125a-5p	lncRNA
NT5C3L	hsa-miR-125b-5p	lncRNA
NT5C3L	hsa-miR-10a-5p	lncRNA
SNAPIN	hsa-miR-301b-3p	lncRNA
SNAPIN	hsa-miR-507	lncRNA
SNAPIN	hsa-miR-125a-5p	lncRNA
SNAPIN	hsa-miR-125b-5p	lncRNA
PTPN7	hsa-miR-507	lncRNA
PTPN7	hsa-miR-135a-5p	lncRNA
PTPN7	hsa-miR-17-5p	lncRNA
PTPN7	hsa-miR-20b-5p	lncRNA
PTPN7	hsa-miR-184	lncRNA
PTPN7	hsa-miR-761	lncRNA
PTPN7	hsa-miR-3619-5p	lncRNA
PTPN7	hsa-miR-216b-5p	lncRNA
PTPN7	hsa-miR-508-3p	lncRNA
PTPN7	hsa-miR-22-3p	lncRNA
PTPN7	hsa-miR-24-3p	lncRNA
PTPN7	hsa-miR-27a-3p	lncRNA
PTPN7	hsa-miR-129-5p	lncRNA
TRIM41	hsa-miR-301b-3p	lncRNA
TRIM41	hsa-miR-507	lncRNA
TRIM41	hsa-miR-135a-5p	lncRNA
TRIM41	hsa-miR-140-5p	lncRNA
TRIM41	hsa-miR-876-3p	lncRNA
TRIM41	hsa-miR-17-5p	lncRNA
TRIM41	hsa-miR-20b-5p	lncRNA
TRIM41	hsa-miR-184	lncRNA
TRIM41	hsa-miR-193a-3p	lncRNA
TRIM41	hsa-miR-206	lncRNA
TRIM41	hsa-miR-613	lncRNA
TRIM41	hsa-miR-761	lncRNA
TRIM41	hsa-miR-3619-5p	lncRNA
TRIM41	hsa-miR-216b-5p	lncRNA
TRIM41	hsa-miR-217	lncRNA
TRIM41	hsa-miR-22-3p	lncRNA
TRIM41	hsa-miR-24-3p	lncRNA
TRIM41	hsa-miR-363-3p	lncRNA
TRIM41	hsa-miR-1297	lncRNA
TRIM41	hsa-miR-27a-3p	lncRNA
TRIM41	hsa-miR-107	lncRNA
TRIM41	hsa-miR-33a-3p	lncRNA
TRIM41	hsa-miR-449c-5p	lncRNA
TRIM41	hsa-miR-125a-5p	lncRNA
TRIM41	hsa-miR-125b-5p	lncRNA
TRIM41	hsa-miR-10a-5p	lncRNA
TRIM41	hsa-miR-129-5p	lncRNA
WASH2P	hsa-miR-507	lncRNA
WASH2P	hsa-miR-184	lncRNA
WASH2P	hsa-miR-193a-3p	lncRNA
WASH2P	hsa-miR-206	lncRNA
WASH2P	hsa-miR-613	lncRNA
WASH2P	hsa-miR-217	lncRNA
WASH2P	hsa-miR-22-3p	lncRNA
WASH2P	hsa-miR-24-3p	lncRNA
TTTY7B	hsa-miR-212-3p	lncRNA
TTTY7B	hsa-miR-137	lncRNA
TTTY7B	hsa-miR-761	lncRNA
TTTY7B	hsa-miR-3619-5p	lncRNA
TTTY7B	hsa-miR-508-3p	lncRNA
TTTY7B	hsa-miR-23b-3p	lncRNA
TTTY7B	hsa-miR-363-3p	lncRNA
OXSM	hsa-miR-507	lncRNA
OXSM	hsa-miR-139-5p	lncRNA
OXSM	hsa-miR-761	lncRNA
OXSM	hsa-miR-3619-5p	lncRNA
OXSM	hsa-miR-217	lncRNA
OXSM	hsa-miR-22-3p	lncRNA
OXSM	hsa-miR-107	lncRNA
OXSM	hsa-miR-33a-3p	lncRNA
OXSM	hsa-miR-449c-5p	lncRNA
CCDC144B	hsa-miR-301b-3p	lncRNA
CCDC144B	hsa-miR-212-3p	lncRNA
CCDC144B	hsa-miR-507	lncRNA
CCDC144B	hsa-miR-137	lncRNA
CCDC144B	hsa-miR-139-5p	lncRNA
CCDC144B	hsa-miR-142-3p	lncRNA
CCDC144B	hsa-miR-146b-5p	lncRNA
CCDC144B	hsa-miR-17-5p	lncRNA
CCDC144B	hsa-miR-20b-5p	lncRNA
CCDC144B	hsa-miR-193a-3p	lncRNA
CCDC144B	hsa-miR-429	lncRNA
CCDC144B	hsa-miR-761	lncRNA
CCDC144B	hsa-miR-3619-5p	lncRNA
CCDC144B	hsa-miR-216b-5p	lncRNA
CCDC144B	hsa-miR-217	lncRNA
CCDC144B	hsa-miR-508-3p	lncRNA
CCDC144B	hsa-miR-23b-3p	lncRNA
CCDC144B	hsa-miR-363-3p	lncRNA
CCDC144B	hsa-miR-1297	lncRNA
CCDC144B	hsa-miR-27a-3p	lncRNA
CCDC144B	hsa-miR-107	lncRNA
CCDC144B	hsa-miR-125a-5p	lncRNA
CCDC144B	hsa-miR-125b-5p	lncRNA
CCDC144B	hsa-miR-129-5p	lncRNA
ADPGK	hsa-miR-212-3p	lncRNA
ADPGK	hsa-miR-507	lncRNA
ADPGK	hsa-miR-139-5p	lncRNA
ADPGK	hsa-miR-140-5p	lncRNA
ADPGK	hsa-miR-876-3p	lncRNA
ADPGK	hsa-miR-146b-5p	lncRNA
ADPGK	hsa-miR-17-5p	lncRNA
ADPGK	hsa-miR-20b-5p	lncRNA
ADPGK	hsa-miR-193a-3p	lncRNA
ADPGK	hsa-miR-206	lncRNA
ADPGK	hsa-miR-613	lncRNA
ADPGK	hsa-miR-429	lncRNA
ADPGK	hsa-miR-761	lncRNA
ADPGK	hsa-miR-3619-5p	lncRNA
ADPGK	hsa-miR-216b-5p	lncRNA
ADPGK	hsa-miR-217	lncRNA
ADPGK	hsa-miR-22-3p	lncRNA
ADPGK	hsa-miR-24-3p	lncRNA
ADPGK	hsa-miR-1297	lncRNA
ADPGK	hsa-miR-107	lncRNA
ADPGK	hsa-miR-33a-3p	lncRNA
ADPGK	hsa-miR-449c-5p	lncRNA
ADPGK	hsa-miR-125a-5p	lncRNA
ADPGK	hsa-miR-125b-5p	lncRNA
DEDD2	hsa-miR-301b-3p	lncRNA
DEDD2	hsa-miR-146b-5p	lncRNA
DEDD2	hsa-miR-193a-3p	lncRNA
DEDD2	hsa-miR-761	lncRNA
DEDD2	hsa-miR-3619-5p	lncRNA
DEDD2	hsa-miR-22-3p	lncRNA
DEDD2	hsa-miR-107	lncRNA
DEDD2	hsa-miR-449c-5p	lncRNA
GBAP1	hsa-miR-212-3p	lncRNA
GBAP1	hsa-miR-761	lncRNA
GBAP1	hsa-miR-3619-5p	lncRNA
GBAP1	hsa-miR-217	lncRNA
GBAP1	hsa-miR-508-3p	lncRNA
GBAP1	hsa-miR-22-3p	lncRNA
GBAP1	hsa-miR-23b-3p	lncRNA
GBAP1	hsa-miR-27a-3p	lncRNA
GBAP1	hsa-miR-33a-3p	lncRNA
GATS	hsa-miR-139-5p	lncRNA
GATS	hsa-miR-761	lncRNA
GATS	hsa-miR-3619-5p	lncRNA
GATS	hsa-miR-508-3p	lncRNA
GATS	hsa-miR-22-3p	lncRNA
GATS	hsa-miR-24-3p	lncRNA
GATS	hsa-miR-107	lncRNA
GATS	hsa-miR-449c-5p	lncRNA
FDXR	hsa-miR-507	lncRNA
FDXR	hsa-miR-146b-5p	lncRNA
FDXR	hsa-miR-193a-3p	lncRNA
FDXR	hsa-miR-761	lncRNA
FDXR	hsa-miR-3619-5p	lncRNA
FDXR	hsa-miR-22-3p	lncRNA
FDXR	hsa-miR-24-3p	lncRNA
FDXR	hsa-miR-107	lncRNA
FDXR	hsa-miR-10a-5p	lncRNA
TKT	hsa-miR-507	lncRNA
TKT	hsa-miR-17-5p	lncRNA
TKT	hsa-miR-20b-5p	lncRNA
TKT	hsa-miR-193a-3p	lncRNA
TKT	hsa-miR-206	lncRNA
TKT	hsa-miR-613	lncRNA
TKT	hsa-miR-761	lncRNA
TKT	hsa-miR-3619-5p	lncRNA
TKT	hsa-miR-217	lncRNA
TKT	hsa-miR-22-3p	lncRNA
TKT	hsa-miR-23b-3p	lncRNA
TKT	hsa-miR-24-3p	lncRNA
TKT	hsa-miR-363-3p	lncRNA
TKT	hsa-miR-107	lncRNA
TKT	hsa-miR-449c-5p	lncRNA
TKT	hsa-miR-125a-5p	lncRNA
TKT	hsa-miR-125b-5p	lncRNA
TKT	hsa-miR-10a-5p	lncRNA
TKT	hsa-miR-129-5p	lncRNA
C1orf50	hsa-miR-301b-3p	lncRNA
C1orf50	hsa-miR-193a-3p	lncRNA
C1orf50	hsa-miR-429	lncRNA
C1orf50	hsa-miR-23b-3p	lncRNA
C1orf50	hsa-miR-24-3p	lncRNA
C1orf50	hsa-miR-1297	lncRNA
C1orf50	hsa-miR-107	lncRNA
C1orf50	hsa-miR-129-5p	lncRNA
SLC9B1	hsa-miR-135a-5p	lncRNA
SLC9B1	hsa-miR-137	lncRNA
SLC9B1	hsa-miR-140-5p	lncRNA
SLC9B1	hsa-miR-876-3p	lncRNA
SLC9B1	hsa-miR-206	lncRNA
SLC9B1	hsa-miR-613	lncRNA
SLC9B1	hsa-miR-761	lncRNA
SLC9B1	hsa-miR-3619-5p	lncRNA
SLC9B1	hsa-miR-216b-5p	lncRNA
SLC9B1	hsa-miR-27a-3p	lncRNA
SLC9B1	hsa-miR-107	lncRNA
SLC9B1	hsa-miR-33a-3p	lncRNA
SLC9B1	hsa-miR-129-5p	lncRNA
TEX264	hsa-miR-212-3p	lncRNA
TEX264	hsa-miR-139-5p	lncRNA
TEX264	hsa-miR-140-5p	lncRNA
TEX264	hsa-miR-876-3p	lncRNA
TEX264	hsa-miR-142-3p	lncRNA
TEX264	hsa-miR-429	lncRNA
TEX264	hsa-miR-761	lncRNA
TEX264	hsa-miR-3619-5p	lncRNA
TEX264	hsa-miR-216b-5p	lncRNA
TEX264	hsa-miR-217	lncRNA
TEX264	hsa-miR-24-3p	lncRNA
TEX264	hsa-miR-27a-3p	lncRNA
TEX264	hsa-miR-33a-3p	lncRNA
TEX264	hsa-miR-449c-5p	lncRNA
TEX264	hsa-miR-125a-5p	lncRNA
TEX264	hsa-miR-125b-5p	lncRNA
TEX264	hsa-miR-129-5p	lncRNA
ZMAT1	hsa-miR-212-3p	lncRNA
ZMAT1	hsa-miR-135a-5p	lncRNA
ZMAT1	hsa-miR-139-5p	lncRNA
ZMAT1	hsa-miR-140-5p	lncRNA
ZMAT1	hsa-miR-876-3p	lncRNA
ZMAT1	hsa-miR-142-3p	lncRNA
ZMAT1	hsa-miR-146b-5p	lncRNA
ZMAT1	hsa-miR-193a-3p	lncRNA
ZMAT1	hsa-miR-206	lncRNA
ZMAT1	hsa-miR-613	lncRNA
ZMAT1	hsa-miR-429	lncRNA
ZMAT1	hsa-miR-761	lncRNA
ZMAT1	hsa-miR-3619-5p	lncRNA
ZMAT1	hsa-miR-216b-5p	lncRNA
ZMAT1	hsa-miR-217	lncRNA
ZMAT1	hsa-miR-22-3p	lncRNA
ZMAT1	hsa-miR-23b-3p	lncRNA
ZMAT1	hsa-miR-24-3p	lncRNA
ZMAT1	hsa-miR-1297	lncRNA
ZMAT1	hsa-miR-107	lncRNA
ZMAT1	hsa-miR-33a-3p	lncRNA
ZMAT1	hsa-miR-125a-5p	lncRNA
ZMAT1	hsa-miR-125b-5p	lncRNA
ZMAT1	hsa-miR-10a-5p	lncRNA
ZMAT1	hsa-miR-129-5p	lncRNA
TAC3	hsa-miR-139-5p	lncRNA
TAC3	hsa-miR-146b-5p	lncRNA
TAC3	hsa-miR-22-3p	lncRNA
TAC3	hsa-miR-23b-3p	lncRNA
TAC3	hsa-miR-24-3p	lncRNA
TAC3	hsa-miR-107	lncRNA
TAC3	hsa-miR-33a-3p	lncRNA
TAC3	hsa-miR-449c-5p	lncRNA
TAC3	hsa-miR-129-5p	lncRNA
KLK2	hsa-miR-212-3p	lncRNA
KLK2	hsa-miR-135a-5p	lncRNA
KLK2	hsa-miR-761	lncRNA
KLK2	hsa-miR-3619-5p	lncRNA
KLK2	hsa-miR-216b-5p	lncRNA
KLK2	hsa-miR-24-3p	lncRNA
KLK2	hsa-miR-1297	lncRNA
KLK2	hsa-miR-107	lncRNA
PMCHL1	hsa-miR-301b-3p	lncRNA
PMCHL1	hsa-miR-212-3p	lncRNA
PMCHL1	hsa-miR-429	lncRNA
PMCHL1	hsa-miR-216b-5p	lncRNA
PMCHL1	hsa-miR-363-3p	lncRNA
PMCHL1	hsa-miR-449c-5p	lncRNA
PMCHL1	hsa-miR-129-5p	lncRNA
PMCHL2	hsa-miR-301b-3p	lncRNA
PMCHL2	hsa-miR-212-3p	lncRNA
PMCHL2	hsa-miR-146b-5p	lncRNA
PMCHL2	hsa-miR-429	lncRNA
PMCHL2	hsa-miR-216b-5p	lncRNA
PMCHL2	hsa-miR-23b-3p	lncRNA
PMCHL2	hsa-miR-363-3p	lncRNA
PMCHL2	hsa-miR-1297	lncRNA
PMCHL2	hsa-miR-125a-5p	lncRNA
PMCHL2	hsa-miR-125b-5p	lncRNA
PMCHL2	hsa-miR-129-5p	lncRNA
BCRP2	hsa-miR-507	lncRNA
BCRP2	hsa-miR-146b-5p	lncRNA
BCRP2	hsa-miR-17-5p	lncRNA
BCRP2	hsa-miR-20b-5p	lncRNA
BCRP2	hsa-miR-761	lncRNA
BCRP2	hsa-miR-3619-5p	lncRNA
BCRP2	hsa-miR-508-3p	lncRNA
BCRP2	hsa-miR-22-3p	lncRNA
BCRP2	hsa-miR-24-3p	lncRNA
BCRP2	hsa-miR-1297	lncRNA
BCRP2	hsa-miR-107	lncRNA
BCRP2	hsa-miR-449c-5p	lncRNA
BCRP2	hsa-miR-10a-5p	lncRNA
TRAPPC1	hsa-miR-301b-3p	lncRNA
TRAPPC1	hsa-miR-507	lncRNA
TRAPPC1	hsa-miR-142-3p	lncRNA
TRAPPC1	hsa-miR-107	lncRNA
FAM161A	hsa-miR-301b-3p	lncRNA
FAM161A	hsa-miR-212-3p	lncRNA
FAM161A	hsa-miR-135a-5p	lncRNA
FAM161A	hsa-miR-140-5p	lncRNA
FAM161A	hsa-miR-876-3p	lncRNA
FAM161A	hsa-miR-17-5p	lncRNA
FAM161A	hsa-miR-20b-5p	lncRNA
FAM161A	hsa-miR-193a-3p	lncRNA
FAM161A	hsa-miR-206	lncRNA
FAM161A	hsa-miR-613	lncRNA
FAM161A	hsa-miR-429	lncRNA
FAM161A	hsa-miR-508-3p	lncRNA
FAM161A	hsa-miR-24-3p	lncRNA
FAM161A	hsa-miR-1297	lncRNA
FAM161A	hsa-miR-27a-3p	lncRNA
FAM161A	hsa-miR-129-5p	lncRNA
DPY19L2P2	hsa-miR-301b-3p	lncRNA
DPY19L2P2	hsa-miR-212-3p	lncRNA
DPY19L2P2	hsa-miR-507	lncRNA
DPY19L2P2	hsa-miR-137	lncRNA
DPY19L2P2	hsa-miR-140-5p	lncRNA
DPY19L2P2	hsa-miR-876-3p	lncRNA
DPY19L2P2	hsa-miR-184	lncRNA
DPY19L2P2	hsa-miR-193a-3p	lncRNA
DPY19L2P2	hsa-miR-761	lncRNA
DPY19L2P2	hsa-miR-3619-5p	lncRNA
DPY19L2P2	hsa-miR-216b-5p	lncRNA
DPY19L2P2	hsa-miR-217	lncRNA
DPY19L2P2	hsa-miR-508-3p	lncRNA
DPY19L2P2	hsa-miR-22-3p	lncRNA
DPY19L2P2	hsa-miR-23b-3p	lncRNA
DPY19L2P2	hsa-miR-24-3p	lncRNA
DPY19L2P2	hsa-miR-363-3p	lncRNA
DPY19L2P2	hsa-miR-27a-3p	lncRNA
DPY19L2P2	hsa-miR-107	lncRNA
DPY19L2P2	hsa-miR-125a-5p	lncRNA
DPY19L2P2	hsa-miR-125b-5p	lncRNA
DPY19L2P2	hsa-miR-129-5p	lncRNA
C12orf32	hsa-miR-137	lncRNA
C12orf32	hsa-miR-140-5p	lncRNA
C12orf32	hsa-miR-876-3p	lncRNA
C12orf32	hsa-miR-17-5p	lncRNA
C12orf32	hsa-miR-20b-5p	lncRNA
C12orf32	hsa-miR-206	lncRNA
C12orf32	hsa-miR-613	lncRNA
C12orf32	hsa-miR-429	lncRNA
C12orf32	hsa-miR-761	lncRNA
C12orf32	hsa-miR-3619-5p	lncRNA
C12orf32	hsa-miR-22-3p	lncRNA
C12orf32	hsa-miR-27a-3p	lncRNA
C12orf32	hsa-miR-33a-3p	lncRNA
C12orf32	hsa-miR-449c-5p	lncRNA
C12orf32	hsa-miR-125a-5p	lncRNA
C12orf32	hsa-miR-125b-5p	lncRNA
PSMD1	hsa-miR-301b-3p	lncRNA
PSMD1	hsa-miR-212-3p	lncRNA
PSMD1	hsa-miR-135a-5p	lncRNA
PSMD1	hsa-miR-137	lncRNA
PSMD1	hsa-miR-139-5p	lncRNA
PSMD1	hsa-miR-140-5p	lncRNA
PSMD1	hsa-miR-876-3p	lncRNA
PSMD1	hsa-miR-142-3p	lncRNA
PSMD1	hsa-miR-146b-5p	lncRNA
PSMD1	hsa-miR-216b-5p	lncRNA
PSMD1	hsa-miR-217	lncRNA
PSMD1	hsa-miR-23b-3p	lncRNA
PSMD1	hsa-miR-24-3p	lncRNA
PSMD1	hsa-miR-363-3p	lncRNA
PSMD1	hsa-miR-449c-5p	lncRNA
PSMD1	hsa-miR-129-5p	lncRNA
SNHG11	hsa-miR-212-3p	lncRNA
SNHG11	hsa-miR-139-5p	lncRNA
SNHG11	hsa-miR-17-5p	lncRNA
SNHG11	hsa-miR-20b-5p	lncRNA
SNHG11	hsa-miR-184	lncRNA
SNHG11	hsa-miR-761	lncRNA
SNHG11	hsa-miR-3619-5p	lncRNA
SNHG11	hsa-miR-22-3p	lncRNA
SNHG11	hsa-miR-24-3p	lncRNA
SNHG11	hsa-miR-107	lncRNA
SNHG11	hsa-miR-449c-5p	lncRNA
C20orf166-AS1	hsa-miR-301b-3p	lncRNA
C20orf166-AS1	hsa-miR-146b-5p	lncRNA
C20orf166-AS1	hsa-miR-17-5p	lncRNA
C20orf166-AS1	hsa-miR-20b-5p	lncRNA
C20orf166-AS1	hsa-miR-193a-3p	lncRNA
C20orf166-AS1	hsa-miR-429	lncRNA
C20orf166-AS1	hsa-miR-22-3p	lncRNA
C20orf166-AS1	hsa-miR-24-3p	lncRNA
C20orf166-AS1	hsa-miR-107	lncRNA
C20orf166-AS1	hsa-miR-125a-5p	lncRNA
C20orf166-AS1	hsa-miR-125b-5p	lncRNA
C20orf166-AS1	hsa-miR-10a-5p	lncRNA
C17orf76-AS1	hsa-miR-301b-3p	lncRNA
C17orf76-AS1	hsa-miR-17-5p	lncRNA
C17orf76-AS1	hsa-miR-20b-5p	lncRNA
C17orf76-AS1	hsa-miR-206	lncRNA
C17orf76-AS1	hsa-miR-613	lncRNA
C17orf76-AS1	hsa-miR-429	lncRNA
C17orf76-AS1	hsa-miR-217	lncRNA
C17orf76-AS1	hsa-miR-508-3p	lncRNA
C17orf76-AS1	hsa-miR-22-3p	lncRNA
C17orf76-AS1	hsa-miR-1297	lncRNA
C17orf76-AS1	hsa-miR-449c-5p	lncRNA
C17orf76-AS1	hsa-miR-129-5p	lncRNA
MARCKSL1	hsa-miR-193a-3p	lncRNA
MARCKSL1	hsa-miR-429	lncRNA
MARCKSL1	hsa-miR-761	lncRNA
MARCKSL1	hsa-miR-3619-5p	lncRNA
MARCKSL1	hsa-miR-22-3p	lncRNA
MARCKSL1	hsa-miR-23b-3p	lncRNA
MARCKSL1	hsa-miR-24-3p	lncRNA
MARCKSL1	hsa-miR-27a-3p	lncRNA
MARCKSL1	hsa-miR-449c-5p	lncRNA
MARCKSL1	hsa-miR-129-5p	lncRNA
C1orf126	hsa-miR-140-5p	lncRNA
C1orf126	hsa-miR-876-3p	lncRNA
C1orf126	hsa-miR-146b-5p	lncRNA
C1orf126	hsa-miR-17-5p	lncRNA
C1orf126	hsa-miR-20b-5p	lncRNA
C1orf126	hsa-miR-184	lncRNA
C1orf126	hsa-miR-193a-3p	lncRNA
C1orf126	hsa-miR-761	lncRNA
C1orf126	hsa-miR-3619-5p	lncRNA
C1orf126	hsa-miR-216b-5p	lncRNA
C1orf126	hsa-miR-508-3p	lncRNA
C1orf126	hsa-miR-27a-3p	lncRNA
C1orf126	hsa-miR-107	lncRNA
C1orf126	hsa-miR-33a-3p	lncRNA
C1orf126	hsa-miR-125a-5p	lncRNA
C1orf126	hsa-miR-125b-5p	lncRNA
POLD4	hsa-miR-140-5p	lncRNA
POLD4	hsa-miR-876-3p	lncRNA
POLD4	hsa-miR-142-3p	lncRNA
POLD4	hsa-miR-17-5p	lncRNA
POLD4	hsa-miR-20b-5p	lncRNA
POLD4	hsa-miR-206	lncRNA
POLD4	hsa-miR-613	lncRNA
POLD4	hsa-miR-761	lncRNA
POLD4	hsa-miR-3619-5p	lncRNA
POLD4	hsa-miR-217	lncRNA
POLD4	hsa-miR-24-3p	lncRNA
POLD4	hsa-miR-10a-5p	lncRNA
POLD4	hsa-miR-129-5p	lncRNA
LINC00476	hsa-miR-301b-3p	lncRNA
LINC00476	hsa-miR-212-3p	lncRNA
LINC00476	hsa-miR-135a-5p	lncRNA
LINC00476	hsa-miR-140-5p	lncRNA
LINC00476	hsa-miR-876-3p	lncRNA
LINC00476	hsa-miR-146b-5p	lncRNA
LINC00476	hsa-miR-17-5p	lncRNA
LINC00476	hsa-miR-20b-5p	lncRNA
LINC00476	hsa-miR-193a-3p	lncRNA
LINC00476	hsa-miR-761	lncRNA
LINC00476	hsa-miR-3619-5p	lncRNA
LINC00476	hsa-miR-216b-5p	lncRNA
LINC00476	hsa-miR-508-3p	lncRNA
LINC00476	hsa-miR-23b-3p	lncRNA
LINC00476	hsa-miR-24-3p	lncRNA
LINC00476	hsa-miR-1297	lncRNA
LINC00476	hsa-miR-27a-3p	lncRNA
LINC00476	hsa-miR-107	lncRNA
LINC00476	hsa-miR-125a-5p	lncRNA
LINC00476	hsa-miR-125b-5p	lncRNA
LINC00476	hsa-miR-10a-5p	lncRNA
LINC00476	hsa-miR-129-5p	lncRNA
SFN	hsa-miR-140-5p	lncRNA
SFN	hsa-miR-876-3p	lncRNA
SFN	hsa-miR-429	lncRNA
SFN	hsa-miR-761	lncRNA
SFN	hsa-miR-3619-5p	lncRNA
TMPRSS7	hsa-miR-507	lncRNA
TMPRSS7	hsa-miR-206	lncRNA
TMPRSS7	hsa-miR-613	lncRNA
TMPRSS7	hsa-miR-429	lncRNA
TMPRSS7	hsa-miR-761	lncRNA
TMPRSS7	hsa-miR-3619-5p	lncRNA
TMPRSS7	hsa-miR-217	lncRNA
TMPRSS7	hsa-miR-23b-3p	lncRNA
TMPRSS7	hsa-miR-363-3p	lncRNA
TMPRSS7	hsa-miR-27a-3p	lncRNA
TMPRSS7	hsa-miR-125a-5p	lncRNA
TMPRSS7	hsa-miR-125b-5p	lncRNA
SCAND2	hsa-miR-135a-5p	lncRNA
SCAND2	hsa-miR-137	lncRNA
SCAND2	hsa-miR-17-5p	lncRNA
SCAND2	hsa-miR-20b-5p	lncRNA
SCAND2	hsa-miR-184	lncRNA
SCAND2	hsa-miR-206	lncRNA
SCAND2	hsa-miR-613	lncRNA
SCAND2	hsa-miR-429	lncRNA
SCAND2	hsa-miR-761	lncRNA
SCAND2	hsa-miR-3619-5p	lncRNA
SCAND2	hsa-miR-217	lncRNA
SCAND2	hsa-miR-23b-3p	lncRNA
SCAND2	hsa-miR-24-3p	lncRNA
SCAND2	hsa-miR-1297	lncRNA
SCAND2	hsa-miR-107	lncRNA
SCAND2	hsa-miR-33a-3p	lncRNA
SCAND2	hsa-miR-449c-5p	lncRNA
SCAND2	hsa-miR-129-5p	lncRNA
ACSF3	hsa-miR-507	lncRNA
ACSF3	hsa-miR-142-3p	lncRNA
ACSF3	hsa-miR-146b-5p	lncRNA
ACSF3	hsa-miR-17-5p	lncRNA
ACSF3	hsa-miR-20b-5p	lncRNA
ACSF3	hsa-miR-184	lncRNA
ACSF3	hsa-miR-193a-3p	lncRNA
ACSF3	hsa-miR-761	lncRNA
ACSF3	hsa-miR-3619-5p	lncRNA
ACSF3	hsa-miR-217	lncRNA
ACSF3	hsa-miR-24-3p	lncRNA
ACSF3	hsa-miR-363-3p	lncRNA
ACSF3	hsa-miR-107	lncRNA
ACSF3	hsa-miR-33a-3p	lncRNA
ACSF3	hsa-miR-449c-5p	lncRNA
ACSF3	hsa-miR-125a-5p	lncRNA
ACSF3	hsa-miR-125b-5p	lncRNA
ACSF3	hsa-miR-129-5p	lncRNA
TTTY14	hsa-miR-137	lncRNA
TTTY14	hsa-miR-146b-5p	lncRNA
TTTY14	hsa-miR-17-5p	lncRNA
TTTY14	hsa-miR-20b-5p	lncRNA
TTTY14	hsa-miR-184	lncRNA
TTTY14	hsa-miR-217	lncRNA
TTTY14	hsa-miR-508-3p	lncRNA
TTTY14	hsa-miR-22-3p	lncRNA
TTTY14	hsa-miR-24-3p	lncRNA
TTTY14	hsa-miR-1297	lncRNA
TTTY14	hsa-miR-125a-5p	lncRNA
TTTY14	hsa-miR-125b-5p	lncRNA
TTTY14	hsa-miR-10a-5p	lncRNA
TTTY14	hsa-miR-129-5p	lncRNA
LINC00303	hsa-miR-212-3p	lncRNA
LINC00303	hsa-miR-508-3p	lncRNA
LINC00303	hsa-miR-22-3p	lncRNA
LINC00303	hsa-miR-125a-5p	lncRNA
LINC00303	hsa-miR-125b-5p	lncRNA
MAN1B1	hsa-miR-301b-3p	lncRNA
MAN1B1	hsa-miR-507	lncRNA
MAN1B1	hsa-miR-135a-5p	lncRNA
MAN1B1	hsa-miR-139-5p	lncRNA
MAN1B1	hsa-miR-193a-3p	lncRNA
MAN1B1	hsa-miR-761	lncRNA
MAN1B1	hsa-miR-3619-5p	lncRNA
MAN1B1	hsa-miR-216b-5p	lncRNA
MAN1B1	hsa-miR-22-3p	lncRNA
MAN1B1	hsa-miR-23b-3p	lncRNA
MAN1B1	hsa-miR-24-3p	lncRNA
MAN1B1	hsa-miR-1297	lncRNA
MAN1B1	hsa-miR-27a-3p	lncRNA
MAN1B1	hsa-miR-125a-5p	lncRNA
MAN1B1	hsa-miR-125b-5p	lncRNA
MAN1B1	hsa-miR-10a-5p	lncRNA
MAN1B1	hsa-miR-129-5p	lncRNA
RPL13AP3	hsa-miR-212-3p	lncRNA
RPL13AP3	hsa-miR-429	lncRNA
RPL13AP3	hsa-miR-761	lncRNA
RPL13AP3	hsa-miR-3619-5p	lncRNA
RPL13AP3	hsa-miR-24-3p	lncRNA
RPL13AP3	hsa-miR-1297	lncRNA
RPL13AP3	hsa-miR-107	lncRNA
RPL13AP3	hsa-miR-10a-5p	lncRNA
RPL13AP3	hsa-miR-129-5p	lncRNA
CASC2	hsa-miR-301b-3p	lncRNA
CASC2	hsa-miR-212-3p	lncRNA
CASC2	hsa-miR-135a-5p	lncRNA
CASC2	hsa-miR-140-5p	lncRNA
CASC2	hsa-miR-876-3p	lncRNA
CASC2	hsa-miR-17-5p	lncRNA
CASC2	hsa-miR-20b-5p	lncRNA
CASC2	hsa-miR-193a-3p	lncRNA
CASC2	hsa-miR-206	lncRNA
CASC2	hsa-miR-613	lncRNA
CASC2	hsa-miR-429	lncRNA
CASC2	hsa-miR-761	lncRNA
CASC2	hsa-miR-3619-5p	lncRNA
CASC2	hsa-miR-216b-5p	lncRNA
CASC2	hsa-miR-217	lncRNA
CASC2	hsa-miR-23b-3p	lncRNA
CASC2	hsa-miR-24-3p	lncRNA
CASC2	hsa-miR-363-3p	lncRNA
CASC2	hsa-miR-27a-3p	lncRNA
CASC2	hsa-miR-107	lncRNA
CASC2	hsa-miR-449c-5p	lncRNA
CASC2	hsa-miR-125a-5p	lncRNA
CASC2	hsa-miR-125b-5p	lncRNA
ACAD9	hsa-miR-301b-3p	lncRNA
ACAD9	hsa-miR-212-3p	lncRNA
ACAD9	hsa-miR-507	lncRNA
ACAD9	hsa-miR-142-3p	lncRNA
ACAD9	hsa-miR-193a-3p	lncRNA
ACAD9	hsa-miR-761	lncRNA
ACAD9	hsa-miR-3619-5p	lncRNA
ACAD9	hsa-miR-216b-5p	lncRNA
ACAD9	hsa-miR-22-3p	lncRNA
ACAD9	hsa-miR-24-3p	lncRNA
ACAD9	hsa-miR-27a-3p	lncRNA
ACAD9	hsa-miR-107	lncRNA
ATP8B5P	hsa-miR-212-3p	lncRNA
ATP8B5P	hsa-miR-135a-5p	lncRNA
ATP8B5P	hsa-miR-140-5p	lncRNA
ATP8B5P	hsa-miR-876-3p	lncRNA
ATP8B5P	hsa-miR-146b-5p	lncRNA
ATP8B5P	hsa-miR-17-5p	lncRNA
ATP8B5P	hsa-miR-20b-5p	lncRNA
ATP8B5P	hsa-miR-429	lncRNA
ATP8B5P	hsa-miR-761	lncRNA
ATP8B5P	hsa-miR-3619-5p	lncRNA
ATP8B5P	hsa-miR-217	lncRNA
ATP8B5P	hsa-miR-23b-3p	lncRNA
ATP8B5P	hsa-miR-24-3p	lncRNA
ATP8B5P	hsa-miR-363-3p	lncRNA
ATP8B5P	hsa-miR-27a-3p	lncRNA
ATP8B5P	hsa-miR-107	lncRNA
ATP8B5P	hsa-miR-449c-5p	lncRNA
ATP8B5P	hsa-miR-125a-5p	lncRNA
ATP8B5P	hsa-miR-125b-5p	lncRNA
ATP8B5P	hsa-miR-129-5p	lncRNA
PPP1R14BP3	hsa-miR-212-3p	lncRNA
PPP1R14BP3	hsa-miR-449c-5p	lncRNA
HERC2P3	hsa-miR-212-3p	lncRNA
HERC2P3	hsa-miR-507	lncRNA
HERC2P3	hsa-miR-135a-5p	lncRNA
HERC2P3	hsa-miR-139-5p	lncRNA
HERC2P3	hsa-miR-140-5p	lncRNA
HERC2P3	hsa-miR-876-3p	lncRNA
HERC2P3	hsa-miR-142-3p	lncRNA
HERC2P3	hsa-miR-146b-5p	lncRNA
HERC2P3	hsa-miR-193a-3p	lncRNA
HERC2P3	hsa-miR-429	lncRNA
HERC2P3	hsa-miR-761	lncRNA
HERC2P3	hsa-miR-3619-5p	lncRNA
HERC2P3	hsa-miR-216b-5p	lncRNA
HERC2P3	hsa-miR-23b-3p	lncRNA
HERC2P3	hsa-miR-24-3p	lncRNA
HERC2P3	hsa-miR-27a-3p	lncRNA
HERC2P3	hsa-miR-107	lncRNA
HERC2P3	hsa-miR-33a-3p	lncRNA
HERC2P3	hsa-miR-449c-5p	lncRNA
HERC2P3	hsa-miR-129-5p	lncRNA
LINC00304	hsa-miR-135a-5p	lncRNA
LINC00304	hsa-miR-184	lncRNA
LINC00304	hsa-miR-193a-3p	lncRNA
LINC00304	hsa-miR-206	lncRNA
LINC00304	hsa-miR-613	lncRNA
LINC00304	hsa-miR-761	lncRNA
LINC00304	hsa-miR-3619-5p	lncRNA
LINC00304	hsa-miR-217	lncRNA
LINC00304	hsa-miR-24-3p	lncRNA
LINC00304	hsa-miR-1297	lncRNA
LINC00304	hsa-miR-10a-5p	lncRNA
SRSF8	hsa-miR-301b-3p	lncRNA
SRSF8	hsa-miR-212-3p	lncRNA
SRSF8	hsa-miR-139-5p	lncRNA
SRSF8	hsa-miR-142-3p	lncRNA
SRSF8	hsa-miR-17-5p	lncRNA
SRSF8	hsa-miR-20b-5p	lncRNA
SRSF8	hsa-miR-217	lncRNA
SRSF8	hsa-miR-22-3p	lncRNA
SRSF8	hsa-miR-23b-3p	lncRNA
SRSF8	hsa-miR-129-5p	lncRNA
SSR4	hsa-miR-135a-5p	lncRNA
SSR4	hsa-miR-193a-3p	lncRNA
SSR4	hsa-miR-206	lncRNA
SSR4	hsa-miR-613	lncRNA
SSR4	hsa-miR-761	lncRNA
SSR4	hsa-miR-3619-5p	lncRNA
SSR4	hsa-miR-22-3p	lncRNA
SSR4	hsa-miR-107	lncRNA
SSR4	hsa-miR-125a-5p	lncRNA
SSR4	hsa-miR-125b-5p	lncRNA
SSR4	hsa-miR-10a-5p	lncRNA
TP53TG1	hsa-miR-507	lncRNA
TP53TG1	hsa-miR-449c-5p	lncRNA
SHMT2	hsa-miR-212-3p	lncRNA
SHMT2	hsa-miR-140-5p	lncRNA
SHMT2	hsa-miR-876-3p	lncRNA
SHMT2	hsa-miR-146b-5p	lncRNA
SHMT2	hsa-miR-17-5p	lncRNA
SHMT2	hsa-miR-20b-5p	lncRNA
SHMT2	hsa-miR-193a-3p	lncRNA
SHMT2	hsa-miR-761	lncRNA
SHMT2	hsa-miR-3619-5p	lncRNA
SHMT2	hsa-miR-217	lncRNA
SHMT2	hsa-miR-508-3p	lncRNA
SHMT2	hsa-miR-22-3p	lncRNA
SHMT2	hsa-miR-24-3p	lncRNA
SHMT2	hsa-miR-107	lncRNA
SHMT2	hsa-miR-449c-5p	lncRNA
SHMT2	hsa-miR-125a-5p	lncRNA
SHMT2	hsa-miR-125b-5p	lncRNA
LINC00085	hsa-miR-193a-3p	lncRNA
LINC00085	hsa-miR-761	lncRNA
LINC00085	hsa-miR-3619-5p	lncRNA
LINC00085	hsa-miR-125a-5p	lncRNA
LINC00085	hsa-miR-125b-5p	lncRNA
DNM1P46	hsa-miR-507	lncRNA
DNM1P46	hsa-miR-17-5p	lncRNA
DNM1P46	hsa-miR-20b-5p	lncRNA
DNM1P46	hsa-miR-193a-3p	lncRNA
DNM1P46	hsa-miR-206	lncRNA
DNM1P46	hsa-miR-613	lncRNA
DNM1P46	hsa-miR-429	lncRNA
DNM1P46	hsa-miR-22-3p	lncRNA
DNM1P46	hsa-miR-24-3p	lncRNA
DNM1P46	hsa-miR-1297	lncRNA
DNM1P46	hsa-miR-107	lncRNA
DNM1P46	hsa-miR-33a-3p	lncRNA
DNM1P46	hsa-miR-449c-5p	lncRNA
DNM1P46	hsa-miR-10a-5p	lncRNA
NCF1B	hsa-miR-135a-5p	lncRNA
NCF1B	hsa-miR-184	lncRNA
NCF1B	hsa-miR-206	lncRNA
NCF1B	hsa-miR-613	lncRNA
NCF1B	hsa-miR-761	lncRNA
NCF1B	hsa-miR-3619-5p	lncRNA
NCF1B	hsa-miR-24-3p	lncRNA
NCF1B	hsa-miR-1297	lncRNA
NCF1B	hsa-miR-129-5p	lncRNA
CRIP2	hsa-miR-139-5p	lncRNA
CRIP2	hsa-miR-193a-3p	lncRNA
CRIP2	hsa-miR-429	lncRNA
CRIP2	hsa-miR-761	lncRNA
CRIP2	hsa-miR-3619-5p	lncRNA
CRIP2	hsa-miR-22-3p	lncRNA
CRIP2	hsa-miR-24-3p	lncRNA
CRIP2	hsa-miR-27a-3p	lncRNA
CRIP2	hsa-miR-33a-3p	lncRNA
CRIP2	hsa-miR-449c-5p	lncRNA
CRIP2	hsa-miR-125a-5p	lncRNA
CRIP2	hsa-miR-125b-5p	lncRNA
WT1-AS	hsa-miR-507	lncRNA
WT1-AS	hsa-miR-135a-5p	lncRNA
WT1-AS	hsa-miR-139-5p	lncRNA
WT1-AS	hsa-miR-17-5p	lncRNA
WT1-AS	hsa-miR-20b-5p	lncRNA
WT1-AS	hsa-miR-193a-3p	lncRNA
WT1-AS	hsa-miR-206	lncRNA
WT1-AS	hsa-miR-613	lncRNA
WT1-AS	hsa-miR-429	lncRNA
WT1-AS	hsa-miR-216b-5p	lncRNA
WT1-AS	hsa-miR-217	lncRNA
WT1-AS	hsa-miR-22-3p	lncRNA
WT1-AS	hsa-miR-23b-3p	lncRNA
WT1-AS	hsa-miR-24-3p	lncRNA
WT1-AS	hsa-miR-363-3p	lncRNA
WT1-AS	hsa-miR-27a-3p	lncRNA
WT1-AS	hsa-miR-449c-5p	lncRNA
WT1-AS	hsa-miR-125a-5p	lncRNA
WT1-AS	hsa-miR-125b-5p	lncRNA
WT1-AS	hsa-miR-129-5p	lncRNA
TTTY8	hsa-miR-137	lncRNA
TTTY8	hsa-miR-24-3p	lncRNA
TTTY8	hsa-miR-27a-3p	lncRNA
TTTY8	hsa-miR-129-5p	lncRNA
PI4KAP2	hsa-miR-301b-3p	lncRNA
PI4KAP2	hsa-miR-507	lncRNA
PI4KAP2	hsa-miR-135a-5p	lncRNA
PI4KAP2	hsa-miR-139-5p	lncRNA
PI4KAP2	hsa-miR-142-3p	lncRNA
PI4KAP2	hsa-miR-146b-5p	lncRNA
PI4KAP2	hsa-miR-17-5p	lncRNA
PI4KAP2	hsa-miR-20b-5p	lncRNA
PI4KAP2	hsa-miR-184	lncRNA
PI4KAP2	hsa-miR-193a-3p	lncRNA
PI4KAP2	hsa-miR-206	lncRNA
PI4KAP2	hsa-miR-613	lncRNA
PI4KAP2	hsa-miR-761	lncRNA
PI4KAP2	hsa-miR-3619-5p	lncRNA
PI4KAP2	hsa-miR-217	lncRNA
PI4KAP2	hsa-miR-508-3p	lncRNA
PI4KAP2	hsa-miR-22-3p	lncRNA
PI4KAP2	hsa-miR-23b-3p	lncRNA
PI4KAP2	hsa-miR-24-3p	lncRNA
PI4KAP2	hsa-miR-1297	lncRNA
PI4KAP2	hsa-miR-27a-3p	lncRNA
PI4KAP2	hsa-miR-107	lncRNA
PI4KAP2	hsa-miR-449c-5p	lncRNA
BPIFA4P	hsa-miR-212-3p	lncRNA
BPIFA4P	hsa-miR-761	lncRNA
BPIFA4P	hsa-miR-3619-5p	lncRNA
BPIFA4P	hsa-miR-217	lncRNA
BPIFA4P	hsa-miR-107	lncRNA
BPIFA4P	hsa-miR-33a-3p	lncRNA
BPIFA4P	hsa-miR-125a-5p	lncRNA
[truncated: 2,864 more rows]
