# Supplementary material for: Integrative analysis of competitive endogenous RNA network reveals the regulatory role of non-coding RNAs in high-glucose-induced human retinal endothelial cells
Source: PeerJ. 2020 Jun 29;8:e9452. doi: 10.7717/peerj.9452 (PMC7331629; doi:10.7717/peerj.9452)
Supplement: Supplemental Information 4 [file peerj-08-9452-s004.xls]

## Sheet: GO
ONTOLOGY	ID	Description	GeneRatio	BgRatio	pvalue	p.adjust	qvalue	geneID	Count
BP	GO:0030010	establishment of cell polarity	8/114	126/17913	1.41367e-06	0.00377734	0.0031205	CRK/WEE1/CRKL/FSCN1/FLOT2/GBF1/ROCK1/CDH5	8
BP	GO:0061014	positive regulation of mRNA catabolic process	5/114	44/17913	8.51502e-06	0.00591474	0.00488623	CPEB3/ZFP36L1/CNOT6L/BTG2/ROCK1	5
BP	GO:0000082	G1/S transition of mitotic cell cycle	10/114	269/17913	8.52022e-06	0.00591474	0.00488623	WEE1/CNOT6L/CDKN1A/BTG2/NPAT/ZNF385A/MCM7/PPAT/MYC/PIM2	10
BP	GO:0021954	central nervous system neuron development	6/114	76/17913	8.85441e-06	0.00591474	0.00488623	CRK/SALL3/CRKL/BTG2/EPHA4/RAC3	6
BP	GO:0007163	establishment or maintenance of cell polarity	8/114	172/17913	1.42316e-05	0.00686656	0.00567254	CRK/WEE1/CRKL/FSCN1/FLOT2/GBF1/ROCK1/CDH5	8
BP	GO:0044843	cell cycle G1/S phase transition	10/114	288/17913	1.54189e-05	0.00686656	0.00567254	WEE1/CNOT6L/CDKN1A/BTG2/NPAT/ZNF385A/MCM7/PPAT/MYC/PIM2	10
BP	GO:0061157	mRNA destabilization	4/114	28/17913	2.83122e-05	0.0108072	0.00892792	CPEB3/ZFP36L1/CNOT6L/ROCK1	4
BP	GO:0050779	RNA destabilization	4/114	30/17913	3.75248e-05	0.0125333	0.0103539	CPEB3/ZFP36L1/CNOT6L/ROCK1	4
BP	GO:0048661	positive regulation of smooth muscle cell proliferation	6/114	101/17913	4.51223e-05	0.0133963	0.0110668	MFN2/EDN1/IL6R/PTGS2/MMP2/IRAK1	6
BP	GO:0031331	positive regulation of cellular catabolic process	10/114	341/17913	6.46485e-05	0.0152609	0.0126072	CPEB3/SOCS5/ULK1/ZFP36L1/CNOT6L/BTG2/MFN2/ROCK1/DAB2/PIM2	10
BP	GO:0048308	organelle inheritance	3/114	13/17913	6.85371e-05	0.0152609	0.0126072	MAPK1/YWHAZ/GBF1	3
BP	GO:0048313	Golgi inheritance	3/114	13/17913	6.85371e-05	0.0152609	0.0126072	MAPK1/YWHAZ/GBF1	3
BP	GO:0050878	regulation of body fluid levels	12/114	499/17913	8.04276e-05	0.0162899	0.0134573	GNAQ/VDR/MAPK1/ZNF385A/MFN2/FZD6/EDN1/YWHAZ/PPAT/NR1H3/RCOR1/CD34	12
BP	GO:1903313	positive regulation of mRNA metabolic process	5/114	71/17913	8.90537e-05	0.0162899	0.0134573	CPEB3/ZFP36L1/CNOT6L/BTG2/ROCK1	5
BP	GO:1902117	positive regulation of organelle assembly	5/114	72/17913	9.52174e-05	0.0162899	0.0134573	ULK1/CNOT6L/VPS4B/EDN1/FSCN1	5
BP	GO:0034605	cellular response to heat	6/114	117/17913	0.000102551	0.0162899	0.0134573	CDKN1A/MAPK1/PTGS2/AKT1S1/CD34/IRAK1	6
BP	GO:0048167	regulation of synaptic plasticity	7/114	169/17913	0.000103641	0.0162899	0.0134573	CPEB3/SQSTM1/MAPK1/EGR2/EPHA4/PTGS2/YWHAH	7
BP	GO:0048660	regulation of smooth muscle cell proliferation	7/114	172/17913	0.000115666	0.01717	0.0141843	CDKN1A/MFN2/EDN1/IL6R/PTGS2/MMP2/IRAK1	7
BP	GO:0048659	smooth muscle cell proliferation	7/114	174/17913	0.000124295	0.0174798	0.0144403	CDKN1A/MFN2/EDN1/IL6R/PTGS2/MMP2/IRAK1	7
BP	GO:1900153	positive regulation of nuclear-transcribed mRNA catabolic process, deadenylation-dependent decay	3/114	16/17913	0.000132341	0.0176808	0.0146063	CPEB3/ZFP36L1/BTG2	3
BP	GO:0048545	response to steroid hormone	10/114	375/17913	0.000141404	0.0179474	0.0148265	ZFP36L1/CDKN1A/VDR/REST/EDN1/UBR5/PTGS2/YWHAH/NR1H3/DAB2	10
BP	GO:1905475	regulation of protein localization to membrane	7/114	181/17913	0.000158714	0.0179474	0.0148265	SQSTM1/CRKL/YWHAZ/VPS4A/YWHAH/DAB2/PTPN9	7
BP	GO:0033002	muscle cell proliferation	8/114	243/17913	0.000163352	0.0179474	0.0148265	CDKN1A/MAPK1/MFN2/EDN1/IL6R/PTGS2/MMP2/IRAK1	8
BP	GO:0071383	cellular response to steroid hormone stimulus	8/114	243/17913	0.000163352	0.0179474	0.0148265	ZFP36L1/VDR/REST/EDN1/UBR5/YWHAH/NR1H3/DAB2	8
BP	GO:0007611	learning or memory	8/114	247/17913	0.000182628	0.0179474	0.0148265	CPEB3/TANC1/CIC/BTG2/MAPK1/ZNF385A/EGR2/PTGS2	8
BP	GO:0007264	small GTPase mediated signal transduction	11/114	465/17913	0.000186394	0.0179474	0.0148265	CRK/RAP2C/SQSTM1/CRKL/CDKN1A/TNFAIP1/MFN2/GBF1/ARAP2/RAC3/ROCK1	11
BP	GO:1900151	regulation of nuclear-transcribed mRNA catabolic process, deadenylation-dependent decay	3/114	18/17913	0.000191058	0.0179474	0.0148265	CPEB3/ZFP36L1/BTG2	3
BP	GO:2000027	regulation of animal organ morphogenesis	8/114	250/17913	0.000198281	0.0179474	0.0148265	PAX9/VDR/ZNRF3/FZD6/EDN1/CD34/MYC/DAB2	8
BP	GO:0009896	positive regulation of catabolic process	10/114	392/17913	0.000202413	0.0179474	0.0148265	CPEB3/SOCS5/ULK1/ZFP36L1/CNOT6L/BTG2/MFN2/ROCK1/DAB2/PIM2	10
BP	GO:0006914	autophagy	11/114	471/17913	0.000208222	0.0179474	0.0148265	ACBD5/YOD1/SQSTM1/ULK1/FNBP1L/VPS4B/MFN2/VPS4A/ROCK1/ZFYVE1/PIM2	11
BP	GO:0061919	process utilizing autophagic mechanism	11/114	471/17913	0.000208222	0.0179474	0.0148265	ACBD5/YOD1/SQSTM1/ULK1/FNBP1L/VPS4B/MFN2/VPS4A/ROCK1/ZFYVE1/PIM2	11
BP	GO:0007265	Ras protein signal transduction	9/114	324/17913	0.000227668	0.0188763	0.0155939	CRK/RAP2C/SQSTM1/CRKL/CDKN1A/TNFAIP1/MFN2/GBF1/ROCK1	9
BP	GO:1903035	negative regulation of response to wounding	5/114	87/17913	0.000233128	0.0188763	0.0155939	CRK/CDKN1A/EPHA4/EDN1/CD34	5
BP	GO:0097734	extracellular exosome biogenesis	3/114	20/17913	0.000264454	0.020783	0.017169	VPS4B/VPS4A/CD34	3
BP	GO:0007599	hemostasis	9/114	336/17913	0.000297669	0.0221777	0.0183213	GNAQ/MAPK1/ZNF385A/MFN2/FZD6/EDN1/YWHAZ/RCOR1/CD34	9
BP	GO:0022411	cellular component disassembly	11/114	492/17913	0.000302519	0.0221777	0.0183213	LIMA1/SQSTM1/VPS4B/MFN2/MMP16/EPHA4/FSCN1/VPS4A/GBF1/MMP2/MYC	11
BP	GO:2000114	regulation of establishment of cell polarity	3/114	21/17913	0.000307102	0.0221777	0.0183213	FLOT2/ROCK1/CDH5	3
BP	GO:0016236	macroautophagy	8/114	272/17913	0.000350136	0.0242499	0.0200331	YOD1/SQSTM1/ULK1/VPS4B/MFN2/VPS4A/ZFYVE1/PIM2	8
BP	GO:0140112	extracellular vesicle biogenesis	3/114	22/17913	0.000353947	0.0242499	0.0200331	VPS4B/VPS4A/CD34	3
BP	GO:0032878	regulation of establishment or maintenance of cell polarity	3/114	23/17913	0.000405157	0.0270645	0.0223583	FLOT2/ROCK1/CDH5	3
BP	GO:0016050	vesicle organization	8/114	280/17913	0.000424666	0.0273703	0.0226109	SQSTM1/FNBP1L/VPS4B/PPP6R1/ZNF385A/VPS4A/GBF1/CD34	8
BP	GO:0006977	DNA damage response, signal transduction by p53 class mediator resulting in cell cycle arrest	4/114	56/17913	0.000442822	0.0273703	0.0226109	CNOT6L/CDKN1A/BTG2/ZNF385A	4
BP	GO:0042481	regulation of odontogenesis	3/114	24/17913	0.000460896	0.0273703	0.0226109	PAX9/EDN1/CD34	3
BP	GO:0046697	decidualization	3/114	24/17913	0.000460896	0.0273703	0.0226109	VDR/MAPK1/PTGS2	3
BP	GO:0072431	signal transduction involved in mitotic G1 DNA damage checkpoint	4/114	57/17913	0.000473923	0.0273703	0.0226109	CNOT6L/CDKN1A/BTG2/ZNF385A	4
BP	GO:1902400	intracellular signal transduction involved in G1 DNA damage checkpoint	4/114	57/17913	0.000473923	0.0273703	0.0226109	CNOT6L/CDKN1A/BTG2/ZNF385A	4
BP	GO:0050890	cognition	8/114	286/17913	0.000488642	0.0273703	0.0226109	CPEB3/TANC1/CIC/BTG2/MAPK1/ZNF385A/EGR2/PTGS2	8
BP	GO:0035690	cellular response to drug	9/114	362/17913	0.000511636	0.0273703	0.0226109	CRK/CRKL/GNAQ/REST/MAPK1/EDN1/PTGS2/PPAT/MYC	9
BP	GO:0009408	response to heat	6/114	158/17913	0.000521386	0.0273703	0.0226109	CDKN1A/MAPK1/PTGS2/AKT1S1/CD34/IRAK1	6
BP	GO:0072413	signal transduction involved in mitotic cell cycle checkpoint	4/114	59/17913	0.000540743	0.0273703	0.0226109	CNOT6L/CDKN1A/BTG2/ZNF385A	4
BP	GO:1902402	signal transduction involved in mitotic DNA damage checkpoint	4/114	59/17913	0.000540743	0.0273703	0.0226109	CNOT6L/CDKN1A/BTG2/ZNF385A	4
BP	GO:1902403	signal transduction involved in mitotic DNA integrity checkpoint	4/114	59/17913	0.000540743	0.0273703	0.0226109	CNOT6L/CDKN1A/BTG2/ZNF385A	4
BP	GO:0010256	endomembrane system organization	9/114	365/17913	0.000542898	0.0273703	0.0226109	SQSTM1/FNBP1L/VPS4B/MAPK1/ZNF385A/YWHAZ/VPS4A/GBF1/TJAP1	9
BP	GO:2000765	regulation of cytoplasmic translation	3/114	26/17913	0.0005866	0.0290258	0.0239786	CPEB3/ZNF385A/UNK	3
BP	GO:0034248	regulation of cellular amide metabolic process	10/114	452/17913	0.000621822	0.0301899	0.0249402	CPEB3/ZFP36L1/CNOT6L/BTG2/PPP1R15B/MAPK1/ZNF385A/EPHA4/ROCK1/UNK	10
BP	GO:0071156	regulation of cell cycle arrest	5/114	108/17913	0.000632723	0.0301899	0.0249402	CNOT6L/CDKN1A/BTG2/ZNF385A/CCNK	5
BP	GO:0031571	mitotic G1 DNA damage checkpoint	4/114	63/17913	0.00069404	0.0319737	0.0264138	CNOT6L/CDKN1A/BTG2/ZNF385A	4
BP	GO:0044819	mitotic G1/S transition checkpoint	4/114	63/17913	0.00069404	0.0319737	0.0264138	CNOT6L/CDKN1A/BTG2/ZNF385A	4
BP	GO:0044783	G1 DNA damage checkpoint	4/114	64/17913	0.000736708	0.0328081	0.0271031	CNOT6L/CDKN1A/BTG2/ZNF385A	4
BP	GO:0060135	maternal process involved in female pregnancy	4/114	64/17913	0.000736708	0.0328081	0.0271031	VDR/MAPK1/PTGS2/PPAT	4
BP	GO:1901991	negative regulation of mitotic cell cycle phase transition	7/114	235/17913	0.000766145	0.0335597	0.027724	WEE1/ZFP36L1/CNOT6L/CDKN1A/BTG2/ZNF385A/VPS4A	7
BP	GO:0050821	protein stabilization	6/114	171/17913	0.000789701	0.0340335	0.0281155	CDKN1A/GNAQ/EPHA4/FLOT2/HIP1/PIM2	6
BP	GO:0071559	response to transforming growth factor beta	7/114	239/17913	0.000845807	0.0356527	0.029453	CRK/CRKL/ZFP36L1/EDN1/ROCK1/CDH5/DAB2	7
BP	GO:0070482	response to oxygen levels	9/114	389/17913	0.000853956	0.0356527	0.029453	ZFP36L1/CDKN1A/REST/EDN1/LOXL2/PTGS2/CD34/IRAK1/MYC	9
BP	GO:1902991	regulation of amyloid precursor protein catabolic process	3/114	30/17913	0.000899198	0.0369639	0.0305363	EPHA4/FLOT2/ROCK1	3
BP	GO:0051056	regulation of small GTPase mediated signal transduction	8/114	316/17913	0.000936417	0.0376757	0.0311243	CRK/SQSTM1/CRKL/TNFAIP1/MFN2/GBF1/ARAP2/RAC3	8
BP	GO:0021953	central nervous system neuron differentiation	6/114	177/17913	0.000944712	0.0376757	0.0311243	CRK/SALL3/CRKL/BTG2/EPHA4/RAC3	6
BP	GO:0061013	regulation of mRNA catabolic process	6/114	178/17913	0.000972675	0.038153	0.0315186	CPEB3/ZFP36L1/CNOT6L/BTG2/YWHAZ/ROCK1	6
BP	GO:0006417	regulation of translation	9/114	397/17913	0.000985238	0.038153	0.0315186	CPEB3/ZFP36L1/CNOT6L/BTG2/PPP1R15B/MAPK1/ZNF385A/ROCK1/UNK	9
BP	GO:0071902	positive regulation of protein serine/threonine kinase activity	8/114	322/17913	0.00105662	0.040227	0.0332319	CRK/DUSP5/CRKL/MAPK1/EPHA4/EDN1/CCNK/IRAK1	8
BP	GO:0000289	nuclear-transcribed mRNA poly(A) tail shortening	3/114	32/17913	0.00108841	0.040227	0.0332319	CPEB3/CNOT6L/BTG2	3
BP	GO:0000288	nuclear-transcribed mRNA catabolic process, deadenylation-dependent decay	4/114	71/17913	0.00108881	0.040227	0.0332319	CPEB3/ZFP36L1/CNOT6L/BTG2	4
BP	GO:0043406	positive regulation of MAP kinase activity	7/114	250/17913	0.00109902	0.040227	0.0332319	CRK/DUSP5/CRKL/MAPK1/EPHA4/EDN1/IRAK1	7
BP	GO:1901652	response to peptide	10/114	491/17913	0.00116699	0.0408534	0.0337494	CRK/ZFP36L1/BTG2/EGR2/EPHA4/EDN1/PTGS2/MMP2/ROCK1/PPAT	10
BP	GO:2000134	negative regulation of G1/S transition of mitotic cell cycle	5/114	124/17913	0.00117929	0.0408534	0.0337494	WEE1/CNOT6L/CDKN1A/BTG2/ZNF385A	5
BP	GO:1901988	negative regulation of cell cycle phase transition	7/114	254/17913	0.00120459	0.0408534	0.0337494	WEE1/ZFP36L1/CNOT6L/CDKN1A/BTG2/ZNF385A/VPS4A	7
BP	GO:0061045	negative regulation of wound healing	4/114	73/17913	0.00120787	0.0408534	0.0337494	CRK/CDKN1A/EDN1/CD34	4
BP	GO:0072401	signal transduction involved in DNA integrity checkpoint	4/114	73/17913	0.00120787	0.0408534	0.0337494	CNOT6L/CDKN1A/BTG2/ZNF385A	4
BP	GO:0072422	signal transduction involved in DNA damage checkpoint	4/114	73/17913	0.00120787	0.0408534	0.0337494	CNOT6L/CDKN1A/BTG2/ZNF385A	4
BP	GO:0007596	blood coagulation	8/114	331/17913	0.0012598	0.0419169	0.034628	GNAQ/MAPK1/MFN2/FZD6/EDN1/YWHAZ/RCOR1/CD34	8
BP	GO:0072395	signal transduction involved in cell cycle checkpoint	4/114	74/17913	0.00127069	0.0419169	0.034628	CNOT6L/CDKN1A/BTG2/ZNF385A	4
BP	GO:0050817	coagulation	8/114	337/17913	0.00141176	0.0455995	0.0376703	GNAQ/MAPK1/MFN2/FZD6/EDN1/YWHAZ/RCOR1/CD34	8
BP	GO:0001893	maternal placenta development	3/114	35/17913	0.00141645	0.0455995	0.0376703	VDR/MAPK1/PTGS2	3
BP	GO:1902807	negative regulation of cell cycle G1/S phase transition	5/114	130/17913	0.00145482	0.0462771	0.03823	WEE1/CNOT6L/CDKN1A/BTG2/ZNF385A	5
BP	GO:0060828	regulation of canonical Wnt signaling pathway	7/114	264/17913	0.00150354	0.0472643	0.0390456	GNAQ/ZNRF3/FZD6/PRDM15/UBR5/TMEM170B/DAB2	7
BP	GO:1900026	positive regulation of substrate adhesion-dependent cell spreading	3/114	36/17913	0.0015381	0.0477884	0.0394785	CRK/CRKL/RAC3	3
BP	GO:0032102	negative regulation of response to external stimulus	8/114	343/17913	0.00157797	0.0480967	0.0397332	CRK/SOCS5/CDKN1A/EPHA4/EDN1/CDH5/NR1H3/CD34	8
BP	GO:0010948	negative regulation of cell cycle process	8/114	344/17913	0.00160712	0.0480967	0.0397332	WEE1/ZFP36L1/CNOT6L/CDKN1A/BTG2/ZNF385A/CCNK/VPS4A	8
BP	GO:1901990	regulation of mitotic cell cycle phase transition	9/114	428/17913	0.00165768	0.0480967	0.0397332	WEE1/CEP57/ZFP36L1/CNOT6L/CDKN1A/VPS4B/BTG2/ZNF385A/VPS4A	9
BP	GO:0042307	positive regulation of protein import into nucleus	3/114	37/17913	0.0016661	0.0480967	0.0397332	MAPK1/UBR5/PTGS2	3
BP	GO:0017148	negative regulation of translation	6/114	198/17913	0.00167795	0.0480967	0.0397332	CPEB3/ZFP36L1/CNOT6L/BTG2/ROCK1/UNK	6
BP	GO:0110110	positive regulation of animal organ morphogenesis	4/114	80/17913	0.00169636	0.0480967	0.0397332	VDR/EDN1/CD34/MYC	4
BP	GO:0051403	stress-activated MAPK cascade	7/114	271/17913	0.00174518	0.0480967	0.0397332	CRKL/ZFP36L1/MAPK1/EPHA4/EDN1/IRAK1/MYC	7
BP	GO:0060213	positive regulation of nuclear-transcribed mRNA poly(A) tail shortening	2/114	10/17913	0.00174741	0.0480967	0.0397332	CPEB3/BTG2	2
BP	GO:0060600	dichotomous subdivision of an epithelial terminal unit	2/114	10/17913	0.00174741	0.0480967	0.0397332	PLXNA1/PLXND1	2
BP	GO:1904896	ESCRT complex disassembly	2/114	10/17913	0.00174741	0.0480967	0.0397332	VPS4B/VPS4A	2
BP	GO:1904903	ESCRT III complex disassembly	2/114	10/17913	0.00174741	0.0480967	0.0397332	VPS4B/VPS4A	2
BP	GO:0030522	intracellular receptor signaling pathway	7/114	272/17913	0.00178203	0.0480967	0.0397332	CRKL/VDR/UBR5/YWHAH/NR1H3/IRAK1/DAB2	7
BP	GO:0031647	regulation of protein stability	7/114	272/17913	0.00178203	0.0480967	0.0397332	CDKN1A/GNAQ/MAPK1/EPHA4/FLOT2/HIP1/PIM2	7
BP	GO:0072583	clathrin-dependent endocytosis	3/114	38/17913	0.00180058	0.0481116	0.0397455	FNBP1L/HIP1/DAB2	3
BP	GO:1903531	negative regulation of secretion by cell	6/114	202/17913	0.00185645	0.0483279	0.0399242	VPS4B/MIDN/REST/EDN1/NR1H3/CD34	6
BP	GO:0071158	positive regulation of cell cycle arrest	4/114	82/17913	0.00185784	0.0483279	0.0399242	CNOT6L/CDKN1A/BTG2/ZNF385A	4
BP	GO:1903311	regulation of mRNA metabolic process	7/114	275/17913	0.00189622	0.0483279	0.0399242	CPEB3/ZFP36L1/CNOT6L/BTG2/REST/YWHAZ/ROCK1	7
BP	GO:0001666	response to hypoxia	8/114	354/17913	0.00192281	0.0483279	0.0399242	ZFP36L1/REST/EDN1/LOXL2/PTGS2/CD34/IRAK1/MYC	8
BP	GO:0045616	regulation of keratinocyte differentiation	3/114	39/17913	0.00194165	0.0483279	0.0399242	ZFP36L1/VDR/ROCK1	3
BP	GO:1904591	positive regulation of protein import	3/114	39/17913	0.00194165	0.0483279	0.0399242	MAPK1/UBR5/PTGS2	3
BP	GO:0050773	regulation of dendrite development	5/114	139/17913	0.00195337	0.0483279	0.0399242	CRK/CPEB3/CRKL/EPHA4/YWHAH	5
BP	GO:0051384	response to glucocorticoid	5/114	139/17913	0.00195337	0.0483279	0.0399242	ZFP36L1/CDKN1A/REST/EDN1/PTGS2	5
BP	GO:0031098	stress-activated protein kinase signaling cascade	7/114	278/17913	0.00201602	0.0494202	0.0408265	CRKL/ZFP36L1/MAPK1/EPHA4/EDN1/IRAK1/MYC	7

## Sheet: KEGG
ID	Description	GeneRatio	BgRatio	pvalue	p.adjust	qvalue	geneID	Count
hsa05163	Human cytomegalovirus infection	11/71	225/7913	4.3872e-06	0.000833569	0.000609591	JAK1/CRK/CRKL/CDKN1A/GNAQ/MAPK1/IL6R/PTGS2/RAC3/ROCK1/MYC	11
hsa05160	Hepatitis C	7/71	155/7913	0.000449444	0.0217863	0.0159324	JAK1/CDKN1A/MAPK1/YWHAZ/YWHAH/NR1H3/MYC	7
hsa05219	Bladder cancer	4/71	41/7913	0.000469089	0.0217863	0.0159324	CDKN1A/MAPK1/MMP2/MYC	4
hsa05220	Chronic myeloid leukemia	5/71	76/7913	0.000568549	0.0217863	0.0159324	CRK/CRKL/CDKN1A/MAPK1/MYC	5
hsa05161	Hepatitis B	7/71	162/7913	0.000586158	0.0217863	0.0159324	JAK1/CDKN1A/MAPK1/EGR2/YWHAZ/IRAK1/MYC	7
hsa05135	Yersinia infection	6/71	120/7913	0.000687988	0.0217863	0.0159324	CRK/CRKL/MAPK1/RAC3/ROCK1/IRAK1	6
hsa04110	Cell cycle	6/71	124/7913	0.000817751	0.0221961	0.016232	WEE1/CDKN1A/MCM7/YWHAZ/YWHAH/MYC	6
hsa04012	ErbB signaling pathway	5/71	85/7913	0.000948462	0.022526	0.0164733	CRK/CRKL/CDKN1A/MAPK1/MYC	5
hsa05206	MicroRNAs in cancer	9/71	310/7913	0.00169691	0.0358237	0.026198	CRK/CRKL/CDKN1A/MAPK1/MMP16/FSCN1/PTGS2/ROCK1/MYC	9
hsa05203	Viral carcinogenesis	7/71	201/7913	0.00206524	0.0392395	0.0286959	JAK1/GTF2A1/CDKN1A/MAPK1/EGR2/YWHAZ/YWHAH	7
hsa04928	Parathyroid hormone synthesis, secretion and action	5/71	106/7913	0.00253447	0.0404438	0.0295766	CDKN1A/GNAQ/VDR/MAPK1/MMP16	5
hsa05170	Human immunodeficiency virus 1 infection	7/71	212/7913	0.00278959	0.0404438	0.0295766	CRK/WEE1/CRKL/GNAQ/MAPK1/RAC3/IRAK1	7
hsa04066	HIF-1 signaling pathway	5/71	109/7913	0.00286194	0.0404438	0.0295766	CDKN1A/PFKP/MAPK1/EDN1/IL6R	5
hsa05131	Shigellosis	4/71	67/7913	0.00298007	0.0404438	0.0295766	CRK/CRKL/MAPK1/ROCK1	4
hsa05211	Renal cell carcinoma	4/71	69/7913	0.00331633	0.0420069	0.0307197	CRK/CRKL/CDKN1A/MAPK1	4
hsa05216	Thyroid cancer	3/71	37/7913	0.00432308	0.0495677	0.0362489	CDKN1A/MAPK1/MYC	3
hsa05212	Pancreatic cancer	4/71	75/7913	0.00447866	0.0495677	0.0362489	JAK1/CDKN1A/MAPK1/RAC3	4
hsa05140	Leishmaniasis	4/71	76/7913	0.00469588	0.0495677	0.0362489	JAK1/MAPK1/PTGS2/IRAK1	4
